# Supplementary material for: Rapid, potent, and persistent covalent chemical probes to deconvolute PI3Kα signaling
Source: Royal Society of Chemistry journal article supplement (doi:10.1039/d4sc05459h), 2024-01-01
Supplement: d4sc05459h1.pdf [file d4sc05459h1.pdf]

## SUPPORTING INFORMATION

### Rapid, Potent, and Persistent Covalent Chemical Probes to Deconvolute PI3K $\alpha$ Signaling

Lukas Bissegger<sup>1†</sup>, Theodora A. Constantin<sup>1†</sup>, Erhan Keles<sup>1†</sup>, Luka Raguž<sup>1</sup>, Isobel Barlow-Busch<sup>3</sup>, Clara Orbegozo<sup>1</sup>, Thorsten Schaefer<sup>1</sup>, Valentina Borlandelli<sup>1</sup>, Thomas Bohnacker<sup>1</sup>, Rohitha Sriramaratnam<sup>1</sup>, Alexander Schäfer<sup>2</sup>, Matthias Gstaiger<sup>2</sup>, John E. Burke<sup>3,4</sup>, Chiara Borsari<sup>1†‡</sup>, Matthias P. Wymann<sup>1\*</sup>

<sup>1</sup>Department of Biomedicine, University of Basel, Mattenstrasse 28, 4058 Basel, Switzerland

<sup>2</sup>Department of Biology, Institute of Molecular Systems Biology, ETH Zurich, Otto-Stern-Weg 3, 8093 Zürich, Switzerland

<sup>3</sup>Department of Biochemistry and Microbiology, University of Victoria, Victoria, British Columbia V8W 2Y2, Canada

<sup>4</sup>Department of Biochemistry and Molecular Biology, The University of British Columbia, Vancouver, British Columbia V6T 1Z3, Canada.

† Equal contribution

\* Corresponding author: [matthias.wymann@unibas.ch](mailto:matthias.wymann@unibas.ch), Tel: +41 61 207 5046

## Table of contents

|                                                                                                        |    |
|--------------------------------------------------------------------------------------------------------|----|
| Supporting Figures.....                                                                                | 3  |
| Figure S1. X-ray crystal structures of p110 $\alpha$ with compounds 1 and 2 .....                      | 3  |
| Figure S2. Time-dependent IC <sub>50</sub> shifts for compounds 1-9, 7r, 9r and CNX1351 .....          | 3  |
| Figure S3. Mass spectrometry of p110 $\alpha$ peptide adducts for 7 or 7r .....                        | 4  |
| Figure S4. Structural discussion of protein-ligand interactions.....                                   | 4  |
| Figure S5. Time- and concentration-dependent TR-FRET ratio curves .....                                | 6  |
| Figure S6. Solvent dependent conformers of 1, 7 and 9 .....                                            | 6  |
| Figure S7. Cell cycle distribution and effect of loss of PTEN on growth rate .....                     | 7  |
| Figure S8. IC <sub>50</sub> s for pPKB and pS6; growth rate, and FOXO1 translocation .....             | 8  |
| Figure S9. Western blots associated with Figure 5 and Figure S10.....                                  | 9  |
| Figure S10. MAPK pathway activation in cancer cell lines - washout assay .....                         | 10 |
| Figure S11. KinomeScan of 1, PQR514, PQR309, BYL719, GDC0980, and PKI-587 .....                        | 11 |
| Supporting Tables .....                                                                                | 12 |
| Table S1. Data for compounds 1-9, 7r, 9r, CNX1351, Ibrutinib, BYL719, GDC-0077 .....                   | 12 |
| Table S2. Summary of modified p110 $\alpha$ peptides with .....                                        | 13 |
| Table S3. Data collection and refinement statistics (molecular replacement) .....                      | 14 |
| Table S4. Lipophilic efficiency (LipE) calculations .....                                              | 15 |
| Table S5. Relative diffusion coefficient calculations .....                                            | 15 |
| Table S6. TPSA and 3D PSA of representative conformers of 1, 7 and 9 .....                             | 16 |
| Table S7. Growth rate inhibition (GR <sub>50</sub> ) for 9, 9r, GDC-0077 and BYL719.....               | 17 |
| Table S8. pPKB (Ser473)/ Tubulin in-cell western IC <sub>50</sub> s for 9, 9r, GDC-0077 and BYL719 ... | 17 |
| Table S9. pS6/tubulin in-cell western: IC <sub>50</sub> s for 9, 9r, GDC-0077 and BYL719.....          | 18 |
| Table S10. FOXO1 KTR translocation; IC <sub>50</sub> s for 9, 9r, GDC-0077 and BYL719. ....            | 18 |
| Table S11. Extended KINOMEScan data.....                                                               | 19 |
| Table S12. Selectivity profile based on KinomeScan data.....                                           | 30 |
| Extended Materials and Methods .....                                                                   | 31 |
| Determination of Covalent PI3K $\alpha$ Modification by Mass Spectrometry .....                        | 31 |
| Determination of Distribution Coefficient (LogD, pH 7.4) .....                                         | 32 |
| Analysis of Aqueous Solubility (Kinetic Solubility).....                                               | 32 |
| Intrinsic Warhead Reactivity ( $k_{\text{chem}}$ ) assay.....                                          | 33 |
| Determination of Kinetic Constants of Inhibitor/PI3K Interaction .....                                 | 34 |
| Cellular, covalent target engagement using NanoBRET (Inhibitor displacement) .....                     | 34 |
| Drug-Target Engagement Kinetics in HEK293 Cells; NanoBRET diffusion assay .....                        | 35 |
| Computational Compound Conformation Searches .....                                                     | 35 |
| KinTek Modelling to Estimate On/Off Target Covalent Modification.....                                  | 36 |
| Cellular Diffusion Coefficients .....                                                                  | 36 |
| Cell Line Maintenance .....                                                                            | 38 |
| Cellular PKB/Akt and S6 Ribosomal Protein Phosphorylation.....                                         | 39 |
| FOXO1 KTR Translocation Assay .....                                                                    | 40 |
| Resazurin Assay to Measure Cellular Viability .....                                                    | 41 |
| Cell Lysis .....                                                                                       | 42 |
| SDS-PAGE .....                                                                                         | 42 |
| Western Blotting.....                                                                                  | 42 |
| Cell Cycle Distribution Analysis .....                                                                 | 43 |
| Chemical Structures.....                                                                               | 44 |
| Final Compounds.....                                                                                   | 44 |
| Reference Compounds .....                                                                              | 44 |
| Intermediates .....                                                                                    | 45 |
| Synthesis and Characterization .....                                                                   | 46 |
| General Information, Chemistry.....                                                                    | 47 |
| Chemical Procedures .....                                                                              | 48 |
| References.....                                                                                        | 70 |
| Synthetic Schemes and Spectroscopic/Analytic Data, Table of Contents .....                             | 72 |

## Supporting Figures

**Figure S1. X-ray crystal structures of p110 $\alpha$  with compounds 1 and 2**

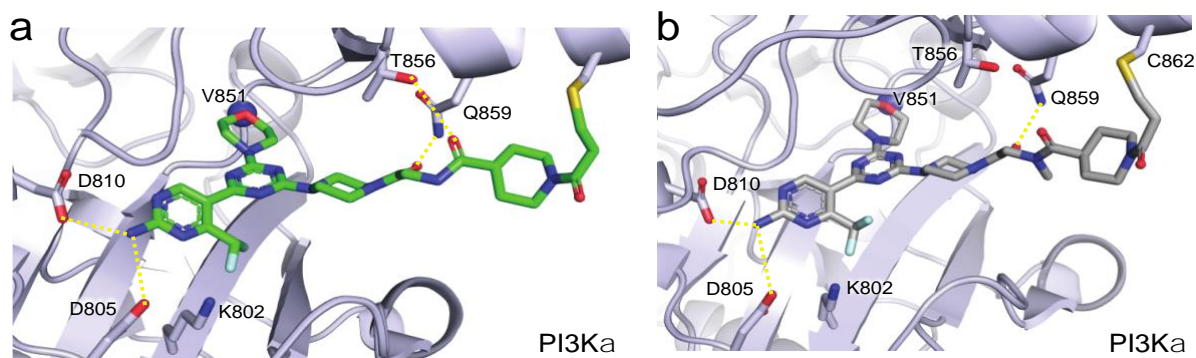

**Figure S1.** X-Ray cocrystal structure of (a) compound 1 and (b) compound 2 in p110 $\alpha$  (PDB-ID: 7R9V and 7R9Y).<sup>1</sup> Hydrogen-bonds are depicted as dashed yellow lines.

**Figure S2. Time-dependent IC<sub>50</sub> shifts for compounds 1-9, 7r, 9r and CNX1351**

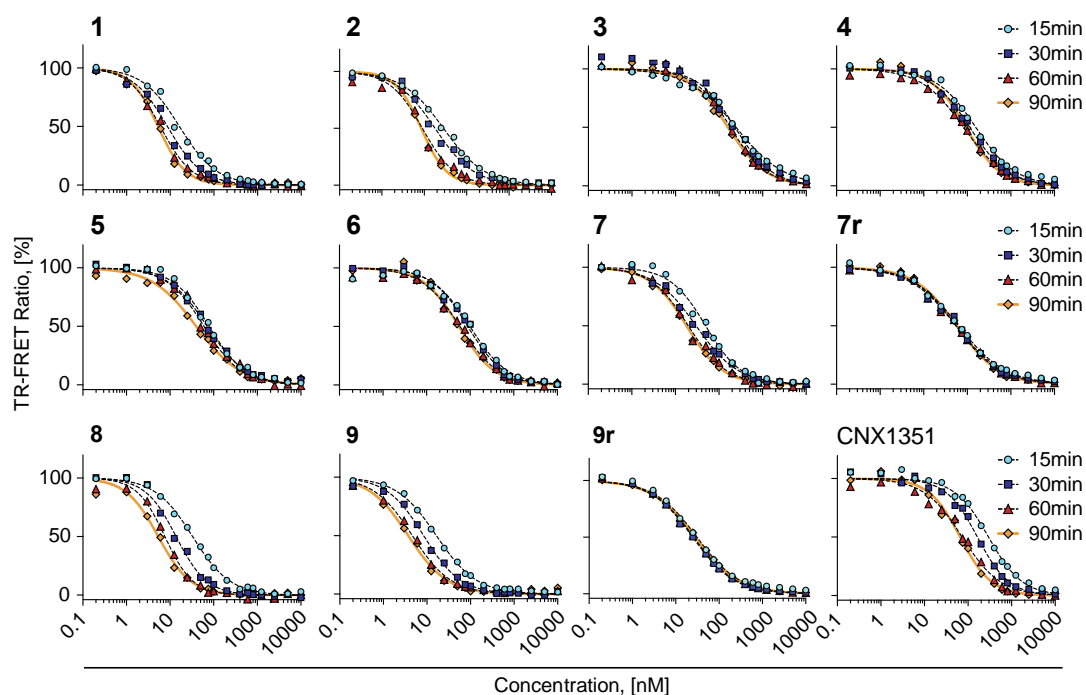

**Figure S2.** Time-dependent (15, 30, 60, 90 min) and time-resolved fluorescence resonance energy transfer (TR-FRET) IC<sub>50</sub> shifts for compounds 1-9, 7r, 9r and CNX1351 fitted to the “log(inhibitor) vs. normalized response – variable slope” function from raw data as exemplified in Figure S5. Data are presented as mean  $\pm$  SEM (n = 3).



compounds **3** and **4**, which lack one of these carbonyl groups. However, compounds **7**, **8**, and **9**, despite also lacking one carbonyl group, appear to compensate for this structural deficit. Notably, compound **9** showed even enhanced target engagement. To rationalize this structure-activity relationship, we performed covalent docking of compounds **3**, **7**, and **9** using Maestro from Schrödinger without constraints, and analyzed the 50 best poses for each molecule (100 poses for compound **3**, due to the presence of two possible protonation isomers). We then measured the distances between the atoms at the Y position (Figure S4a) of the docked molecules in all 50 poses and the four closest amino acids within p110 $\alpha$  (Thr856 (O-3), Met858 (S-4), Gln859 (N-4), and Ser919 (O-3), see Figure S4b). No consistent trend was observed in distances between Y atoms and Met858 or Ser919 across the tested compounds (Figure S4d). However, the mean distances from the Y atoms to Thr856 and Gln859 decreased with increasing  $k_{\text{inact}}/K_i$  values, suggesting a connection between target engagement and proximity of the linker region to the protein surface. To further visualize this observation, we calculated the center of mass for the Y atoms in each molecule's 50 poses and placed pseudoatoms at these positions (Figure S4c). This analysis showed a closer proximity of the Y position to Thr856 and Gln859 in compounds **9** (green) and **8** (yellow), as compared to **3** (brown) and **7** (cyan), but differences remained in the 1 Å range. One might therefore speculate that the observed structure-activity relationship is driven by a more restricted movement of **9** and **8** due to tighter surface association in the linker region, which reduces the degrees of freedom for warhead positioning and increases the likelihood of productive warhead orientation towards Cys862. This interpretation is in accordance with a well-defined electron density map of **9** in complex with p110 $\alpha$  (Figure 3g; PDB-ID: 8TWY).

**Figure S5. Time- and concentration-dependent TR-FRET ratio curves**

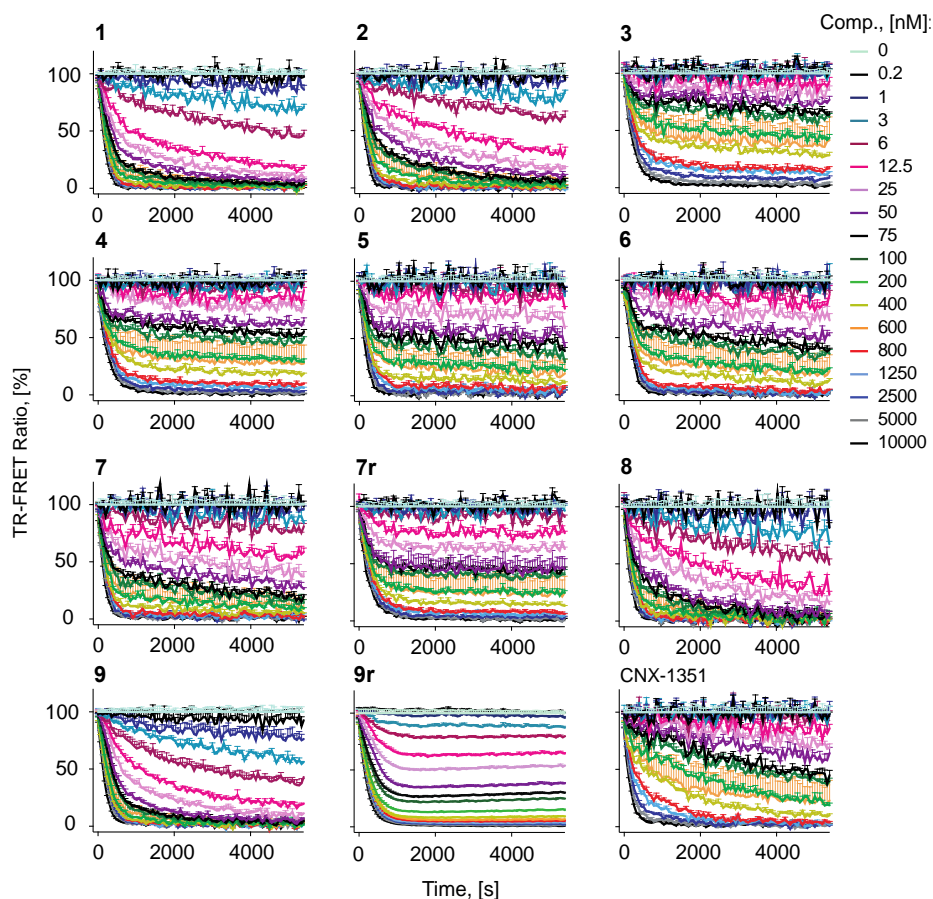

**Figure S5.** Time- and concentration-dependent TR-FRET ratio curves showing a time-dependent tracer displacement triggered by compound binding to recombinant PI3K $\alpha$  protein. Data are presented as mean  $\pm$  SEM ( $n = 3$ ).

**Figure S6. Solvent dependent conformers of 1, 7 and 9**

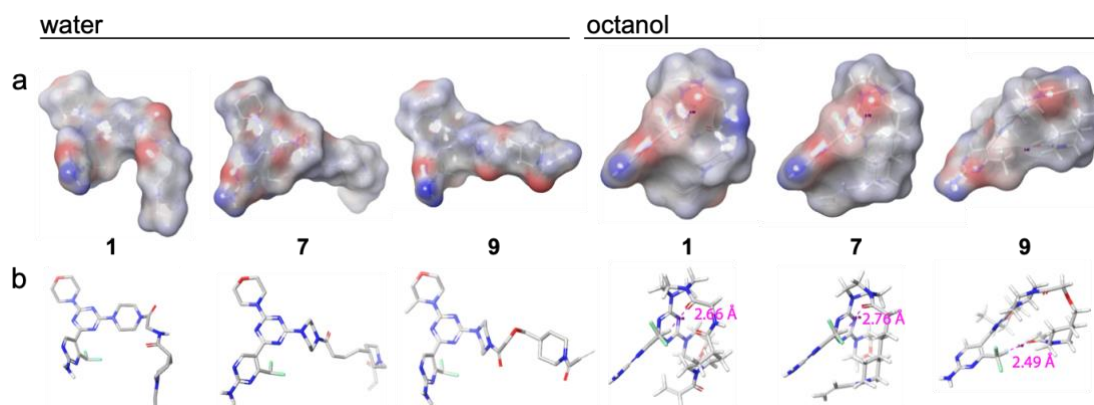

**Figure S6.** Representative conformers of **1**, **7**, and **9** observed during MacroModel conformational sampling in water or octanol. For each structure-solvent pair, the representative conformer is depicted as: **(a)** ligand surface, color coded according to its electrostatic potential, with color ramp in Red\_White\_Blue (min: -0.3; max 0.3); **(b)** thick tube representation via Maestro Schrödinger, with light grey atoms: C, red atoms: O, blue atoms: N, light green atoms: F. Intramolecular hydrogen bonds are depicted as a magenta dashed line. For TPSA and 3D PSA values see Table S6.

**Figure S7. Cell cycle distribution and effect of loss of PTEN on growth rate**

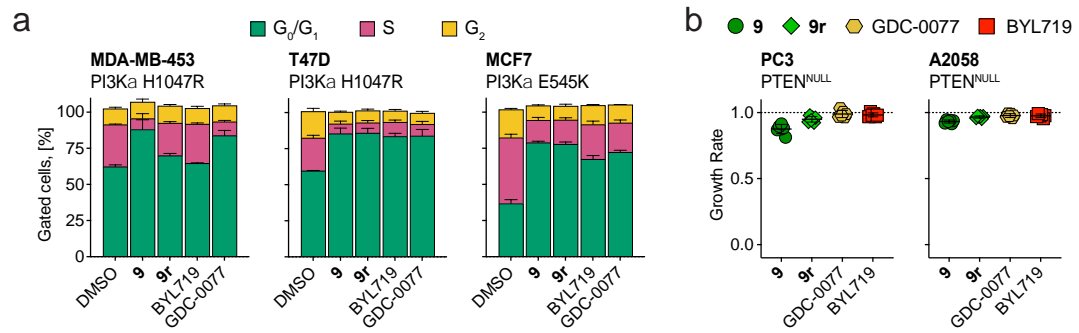

**Figure S7. (a)** Cell cycle distribution in cancer cell lines with mutated PI3K $\alpha$  after 48 h exposure to 50 nM (MDA-MB-453) or 1  $\mu$ M (T47D and MCF7) of the indicated inhibitors or DMSO. After DAPI staining, cell cycle profiles were determined by FACS (n=3, mean  $\pm$  SEM). **(b)** Growth rate of cancer cell lines with loss of PTEN in response to intermittent exposure (4 h/day followed by washout for 4 days) to inhibitors (n = 2 with technical triplicates, mean  $\pm$  SD). Experiments were carried out in complete growth medium containing 10% FCS.

## Figure S8. IC<sub>50</sub>s for pPKB and pS6; growth rate, and FOXO1 translocation

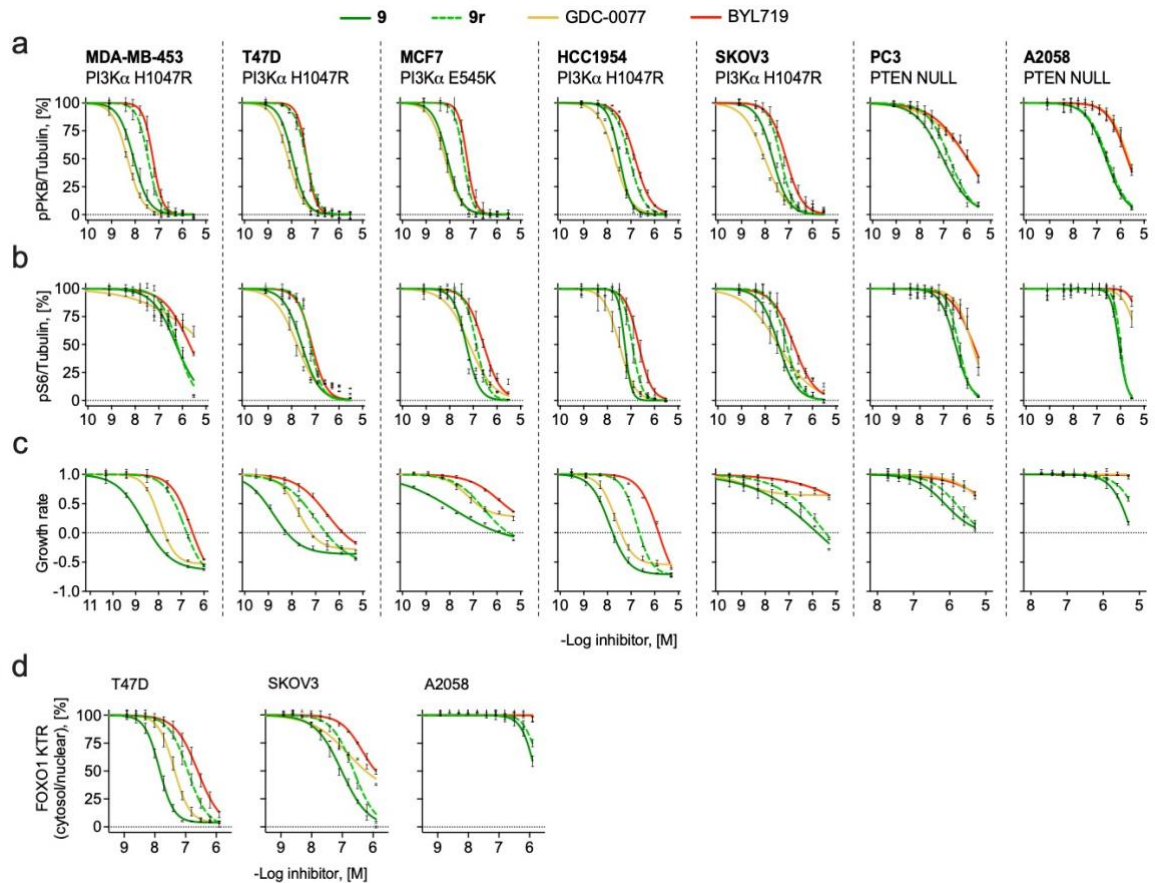

**Figure S8. (a)** Dose-response curves for pPKB (Ser743)/Tubulin determined by in-cell western (ICW) after 2 h incubation with indicated compounds. Data are shown as mean  $\pm$  SEM. MDA-MB-453 and PC3 (n=4), T47D, MCF7, HCC1954, SKOV3 and A2058 (n=3). **(b)** Dose-response curves for pS6 (Ser235/Ser236)/Tubulin determined by ICW after 2 h incubation with compounds. Data are shown as mean  $\pm$  SEM. MDA-MB-453, T47D, MCF7, HCC1954, SKOV3 and PC3 (n=3), A2058 (n=4). **(c)** Growth rate inhibition curves determined by resazurin assay after 72 h incubation with compounds. Data are shown as mean  $\pm$  SEM. MDA-MB-453 and HCC1954 (n=3), T47D, MCF7, SKOV3, PC3, A2058 (n=4). **(d)** FOXO1 KTR translocation (cytosolic/nuclear ratio) determined by high-content microscopy after 2 h incubation with compounds. Data are shown as mean  $\pm$  SEM (n = 3). Experiments were carried out in complete growth medium containing 10% FCS.



**Figure S9. Western blots associated with Figure 5 and Figure S10**

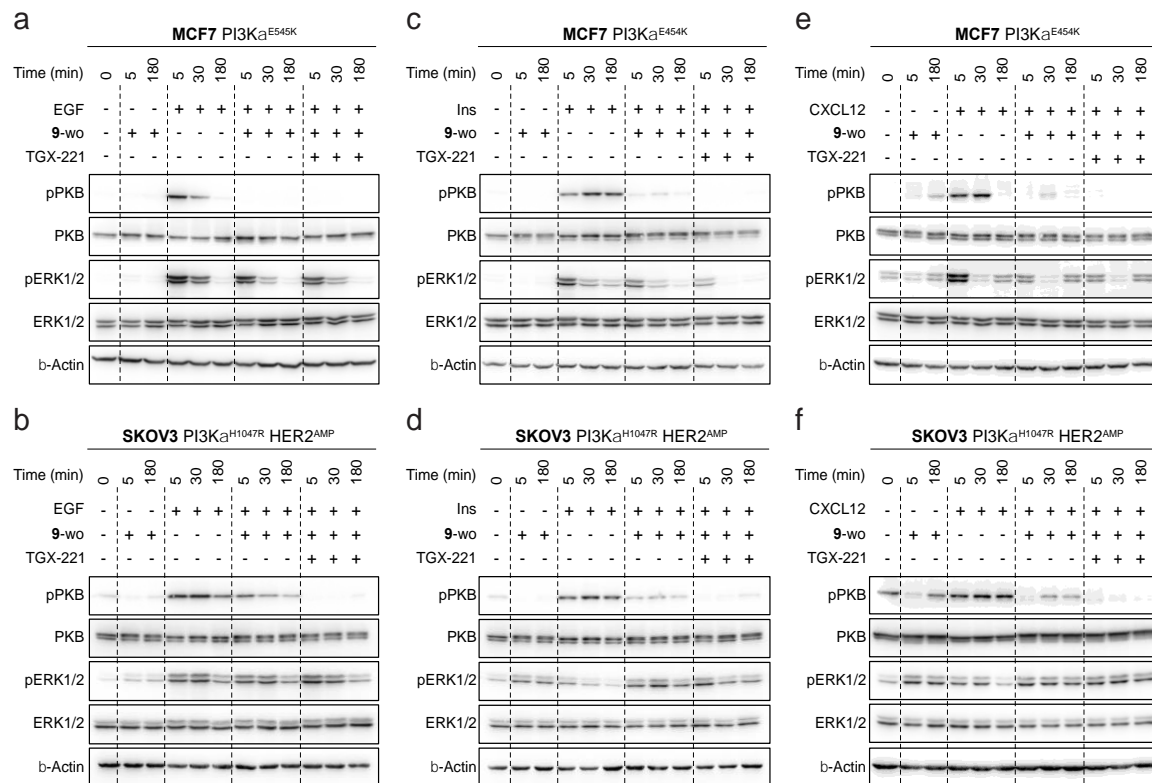

**Figure S9.** Representative western blots associated with data in Figure 5 and Figure S10. Serum-starved MCF7 or SKOV3 cells (24 h) were pre-incubated with **9** (1  $\mu$ M) for 2 h followed by washout (labelled **9-w/o**). Receptor ligands: **(a,b)** 10 ng/ml EGF, **(c,d)** 10  $\mu$ g/ml insulin, and **(e,f)** 50 ng/ml CXCL12 were then added to the medium in the absence or presence of the PI3K $\beta$ -selective inhibitor TGX221 (1  $\mu$ M) for the indicated times (5, 30, 180 min) followed by lysis and measurement of phosphorylated and total Akt/PKB (Ser473) and ERK1/2 (Thr202/Tyr204) by western blot.  $\beta$ -Actin serves as loading control. Stimulations and washouts were carried out using medium without FCS.

**Figure S10. MAPK pathway activation in cancer cell lines - washout assay**

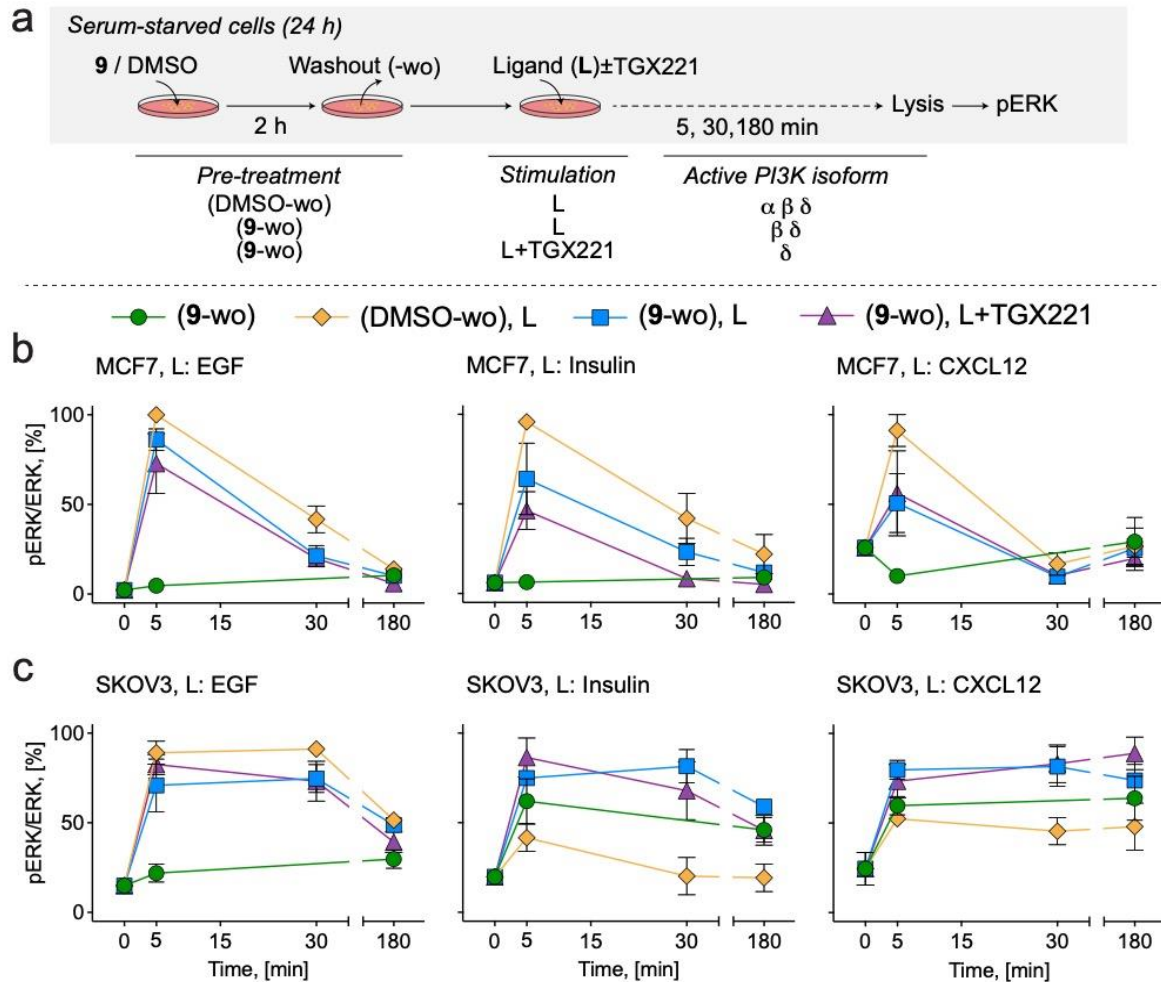

**Figure S10. (a)** Schematic diagram of MAPK pathway stimulation in cancer cell lines. Serum starved cells (24 h) were incubated with 1  $\mu$ M **9** or DMSO for 2 h followed by washout (labelled **9-wo** or DMSO-wo). Receptor ligands (L) were then added to the medium in the absence or presence of the PI3K $\beta$ -selective inhibitor TGX221 (1  $\mu$ M) for the indicated times (5, 30, 180 min) prior to lysis. Total ERK1/2 and pERK1/2 (Thr202/Tyr204) levels were measured by western blot (Figure S9) as a readout of MAPK signaling. All treatments and media changes were carried out using serum-free medium. Depicted in the schematic are the PI3K isoforms remaining active after inhibitor treatments. **(b)** MAPK signaling in MCF7 cells treated with inhibitors and stimulated with 10 ng/ml EGF (left), 10  $\mu$ g/ml insulin (center) or 50 ng/ml CXCL12 (right). **(c)** MAPK signaling in SKOV3 cells treated with inhibitors and stimulated with 10 ng/ml EGF (left), 10  $\mu$ g/ml insulin (center) or 50 ng/ml CXCL12 (right). Stimulations and washouts were carried out using medium without FCS.

**Figure S11. KinomeScan of 1, PQR514, PQR309, BYL719, GDC0980, and PKI-587**

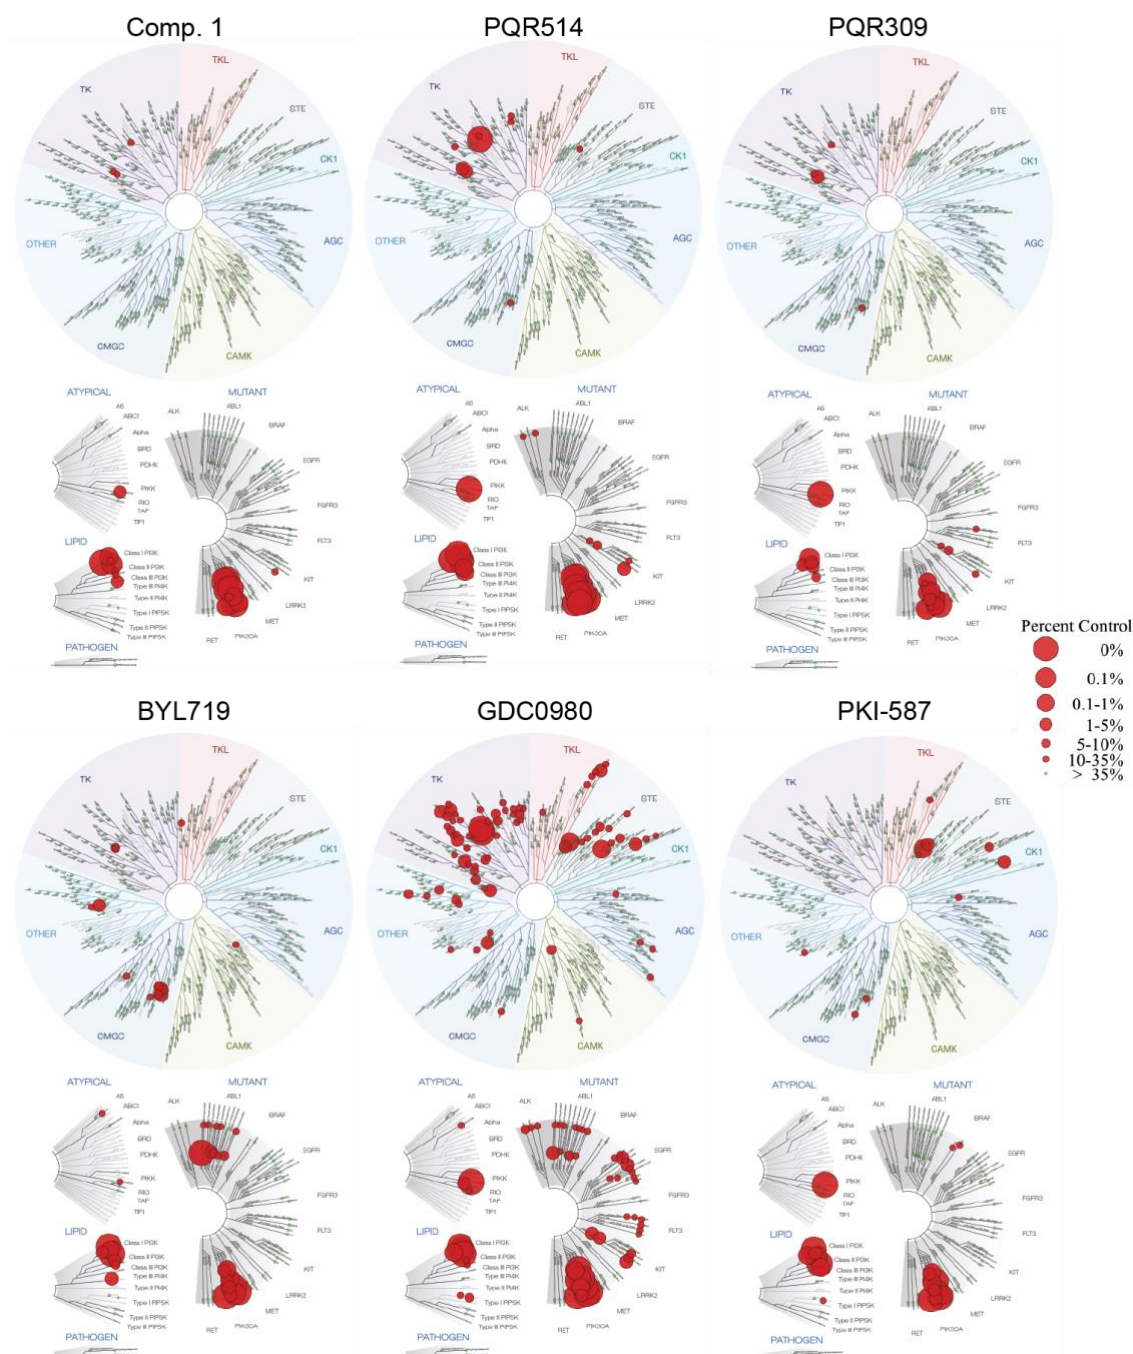

**Figure S11.** Kinome interactions of compound **1**, PQR514, PQR309, BYL719, GDC0980, PKI-587 as TREEspot Visualization. For data on **9** see Figure 6. Kinases that bind to compounds are marked by red circles (larger circles indicate higher-affinity; see free kinase as % of control). AGC: PKA, PKG and PKC kinases; CAMK: calcium-calmodulin-dependent protein kinases; CK1: casein kinase 1; CMGC: CDK, MAPK, GSK3, CLK family kinases; STE: Homologs of yeast Sterile 7, Sterile 11, Sterile 20 kinases; TK: Tyrosine kinases; TKL: Tyrosine kinase-like. Quantitative values for all compounds are in Table S11. Data for **1** and BYL719 (alpelisib) have been previously reported;<sup>1</sup> as well as PQR514;<sup>2</sup> PQR309, GDC0980 and PKI057.<sup>3</sup> Images were generated using TREEspot™ Software (KINOMEScan®, DiscoverRx). Selectivity scores are depicted in Table S12.

## Supporting Tables

**Table S1. Data for compounds 1-9, 7r, 9r, CNX1351, Ibrutinib, BYL719, GDC-0077**

| Compound  | cLogP <sup>a</sup> | LogD |      | Solubility, [μM] <sup>b</sup> |      | $k_{chem} \cdot 10^4$ , [M <sup>-1</sup> s <sup>-1</sup> ] <sup>c,d</sup> |      | $k_{inact} \cdot 10^4$ , [s <sup>-1</sup> ] <sup>d</sup> |      | $K_i$ , [nM] <sup>d</sup> |      | $k_{inact}/K_i \cdot 10^5$ , [nM <sup>-1</sup> s <sup>-1</sup> ] <sup>d</sup> |      | IC <sub>50</sub> pPKB, [nM] <sup>d,\$</sup> |     |
|-----------|--------------------|------|------|-------------------------------|------|---------------------------------------------------------------------------|------|----------------------------------------------------------|------|---------------------------|------|-------------------------------------------------------------------------------|------|---------------------------------------------|-----|
|           |                    | Mean | SD   | Mean                          | SD   | Mean                                                                      | SD   | Mean                                                     | SD   | Mean                      | SD   | Mean                                                                          | SD   | Mean                                        | SD  |
| <b>1</b>  | 0.65               | 1.12 | 0.02 | 333                           | 6.65 | 3.7                                                                       | 0.13 | 9.27                                                     | 1.53 | 2.23                      | 0.33 | 41.6                                                                          | 3.8  | 86                                          | 2.9 |
| <b>2</b>  | 0.89               | 0.97 | 0.04 | 383                           | 4.10 | 3.5                                                                       | 0.90 | 11.8                                                     | 0.99 | 5.26                      | 0.66 | 22.5                                                                          | 1.97 | 82                                          | 2.7 |
| <b>3</b>  | 1.61               | 1.79 | 0.06 | 363                           | 0.00 | 2.7                                                                       | 0.23 | 1.57                                                     | 0.12 | 29.5                      | 2.23 | 0.53                                                                          | 0.01 | 38                                          | 3.9 |
| <b>4</b>  | 1.46               | 1.40 | 0.02 | 393                           | 2.12 | 5.2 <sup>#</sup>                                                          | 0.43 | 1.13                                                     | 0.15 | 13.7                      | 1.42 | 0.82                                                                          | 0.08 | 69                                          | 15  |
| <b>5</b>  | 3.85               | 3.32 | 0.01 | 7                             | 0.28 | 3.2                                                                       | 0.27 | 0.85                                                     | 0.05 | 8.4                       | 1.01 | 1.03                                                                          | 0.15 | 54                                          | 5.6 |
| <b>6</b>  | 3.85               | 2.66 | 0.03 | 46                            | 0.14 | 2.9                                                                       | 0.47 | 2.14                                                     | 0.15 | 11.6                      | 1.18 | 1.85                                                                          | 0.07 | 41                                          | 7.0 |
| <b>7</b>  | 2.68               | 2.67 | 0.04 | 243                           | 0.42 | 2.5                                                                       | 0.01 | 3.09                                                     | 0.31 | 5.00                      | 0.91 | 6.24                                                                          | 0.53 | 22                                          | 2.4 |
| <b>7r</b> | 2.56               | n.d. |      | n.d.                          |      | -                                                                         | -    | -                                                        | -    | 6.26                      | 0.25 | -                                                                             | -    | 40                                          | 2.9 |
| <b>8</b>  | 1.47               | 1.70 | 0.07 | 381                           | 2.40 | 2.9                                                                       | 0.40 | 10.0                                                     | 1.74 | 4.15                      | 1.01 | 24.4                                                                          | 2.51 | 19                                          | 3.0 |
| <b>9</b>  | 1.88               | 2.43 | 0.01 | 357                           | 7.21 | 3.0                                                                       | 0.7  | 48.2                                                     | 5.82 | 8.68                      | 1.34 | 56.1                                                                          | 7.57 | 19                                          | 2.0 |
| <b>9r</b> | 1.76               | n.d. |      | n.d.                          |      | -                                                                         | -    | -                                                        | -    | 2.9                       | 0.12 | -                                                                             | -    | 48                                          | 3.6 |
| CNX1351   | 4.68               | 3.96 | 0.17 | 10                            | 0.00 | 2.22                                                                      | 0.61 | 7.79                                                     | 0.77 | 43.3                      | 6.93 | 1.82                                                                          | 0.19 | 172                                         | 27  |
| Ibrutinib | 3.57               | 4.08 | 0.03 | 10                            | 0.42 | 10                                                                        | 1.02 | -                                                        | -    | -                         | -    | -                                                                             | -    | -                                           | -   |
| BYL719    | 2.78               | 3.16 | 0.01 | 49                            | 2.21 | -                                                                         | -    | -                                                        | -    | 0.83                      | 0.1  | -                                                                             | -    | 162                                         | 36  |
| GDC-0077  | 1.12               | 1.10 | 0.02 | 357                           | 2.55 | -                                                                         | -    | -                                                        | -    | 0.50                      | 0.04 | -                                                                             | -    | 10                                          | 1.5 |

<sup>a</sup>Calculated using MarvinSuite at pH 7.4; <sup>b</sup>Kinetic solubility measured by Bienta Enamine Biology Services at pH 7.4 (solubility in PBS). <sup>c</sup>Compound concentration was 1 mM and βME concentration was 600 mM. <sup>d</sup>Means and standard deviations (SD) were calculated from >= 3 independent measurements. <sup>\$</sup>Phosphorylation of PKB/Akt on Ser473 was determined in SKOV3 cells by in-cell western assays after 1 h of compound exposure. <sup>#</sup>Approximation due to lack of baseline separation between starting material and adduct with βME; n.d., not determined.

**Table S2. Summary of modified p110 $\alpha$  peptides with**

| Peptide Probability | Treatment | Cys862 Modification | Modified Peptide Sequence       | Protein | Neutral Mass | Charge | m/z      | RT      | ppm    | mvh   |
|---------------------|-----------|---------------------|---------------------------------|---------|--------------|--------|----------|---------|--------|-------|
| 0.999999            | 7         | 7                   | R.NSHTIM[147.04]QIQC[703.32]K.G | P42336  | 1917.9265    | 2      | 959.9705 | 2183.71 | 1.2449 | 20.72 |
| 0.999999            | 7         | 7                   | R.NSHTIMQIQC[703.32]K.G         | P42336  | 1901.9316    | 2      | 951.9731 | 2443.76 | 2.561  | 18.14 |

**Table S2.** Peptide Probability: Trans Proteomic Pipeline derived probability; Cys862 Modification: Observed modification on Cys862; Modified Peptide Sequence, 147.04 = oxidation, 703.32 = 7; Protein, Protein Uniprot Accession; m/z, mass to charge ratio; RT, retention time; ppm, ppm mass deviation precursor; mvh, mvh Myrimatch raw ion score.

**Table S3. Data collection and refinement statistics (molecular replacement)**

| PIK3CA-9<br>(PDB: 8TWY)                             |                                |
|-----------------------------------------------------|--------------------------------|
| Data collection                                     |                                |
| Space group                                         | P212121                        |
| Cell dimensions                                     |                                |
| <i>a</i> , <i>b</i> , <i>c</i> (Å)                  | 59.1 135.4 143.7               |
| <i>a</i> , <i>b</i> , <i>g</i> (°)                  | 90 90 90                       |
| Resolution (Å)                                      | 49.28 - 2.67 (2.73 -<br>2.67)* |
| <i>R</i> <sub>merge</sub>                           | 0.113 (3.7580)                 |
| <i>I</i> / $\sigma I$                               | 15.7 (0.77)                    |
| CC1/2                                               | 0.999 (0.525)                  |
| Completeness (%)                                    | 99.68 (100.0)                  |
| Redundancy                                          | 13.5 (13.4)                    |
| Refinement                                          |                                |
| Resolution (Å)                                      | 49.28 - 2.67                   |
| No. unique reflections                              | 33570 (1573)                   |
| <i>R</i> <sub>work</sub> / <i>R</i> <sub>free</sub> | 22.5/26.1                      |
| No. atoms                                           |                                |
| Protein                                             | 6631                           |
| Ligand/ion                                          | 6575                           |
| Water                                               | 56                             |
| 0                                                   | 0                              |
| <i>B</i> -factors                                   |                                |
| Protein                                             | 105.5                          |
| Ligand/ion                                          | 106.0                          |
| Water                                               |                                |
| R.m.s. deviations                                   |                                |
| Bond lengths (Å)                                    | 0.003                          |
| Bond angles (°)                                     | 0.57                           |

\*Values in parentheses are for highest-resolution shell.

**Table S4. Lipophilic efficiency (LipE) calculations**

| Compound | LogD, pH 7.4 | IC <sub>50</sub> pPKB (S473) SKOV3, [nM] | pIC <sub>50</sub> | LipE |
|----------|--------------|------------------------------------------|-------------------|------|
| 1        | 1.12         | 81.7                                     | 7.09              | 5.97 |
| 2        | 0.97         | 85.7                                     | 7.07              | 6.10 |
| 3        | 1.79         | 38.3                                     | 7.42              | 5.63 |
| 4        | 1.40         | 68.4                                     | 7.17              | 5.77 |
| 5        | 3.32         | 54.1                                     | 7.27              | 3.95 |
| 6        | 2.66         | 41.0                                     | 7.39              | 4.73 |
| 7        | 2.67         | 21.5                                     | 7.67              | 5.00 |
| 8        | 1.7          | 19.3                                     | 7.71              | 6.01 |
| 9        | 2.43         | 19.2                                     | 7.71              | 5.29 |
| CNX1351  | 3.96         | 172                                      | 6.76              | 2.80 |
| BYL719   | 3.16         | 162                                      | 6.79              | 3.63 |

**Table S4.** LogD (pH7.4) were measured by Bienta Enamine Biology Services. Lipophilic efficiency (LipE) calculations for compounds calculated to the following equation:

$$-\log(\text{IC}_{50}) - \text{LogD} = \text{LipE}$$

**Table S5. Relative diffusion coefficient calculations**

| Compound | $k_1$ [cm <sup>3</sup> /s]·10 <sup>4</sup> |      | D <sub>rel(BYL719)</sub> [cm <sup>2</sup> /s] |       |
|----------|--------------------------------------------|------|-----------------------------------------------|-------|
|          | mean                                       | SD   | mean                                          | SD    |
| 1        | 1.84                                       | 0.22 | 0.05                                          | 0.005 |
| 2        | 3.71                                       | 0.78 | 0.10                                          | 0.016 |
| 6        | 32.4                                       | 2.04 | 0.84                                          | 0.043 |
| 7        | 39.2                                       | 3.54 | 1.01                                          | 0.075 |
| 7r       | 39.5                                       | 6.44 | 1.02                                          | 0.136 |
| 8        | 88.3                                       | 7.99 | 2.28                                          | 0.168 |
| 9        | 108                                        | 2.7  | 2.78                                          | 0.057 |
| 9r       | 106                                        | 8.64 | 2.75                                          | 0.181 |
| CNX1351  | 4.57                                       | 0.56 | 0.12                                          | 0.012 |
| BYL719   | 38.8                                       | 4.23 | 1                                             | 0.089 |

**Table S5.** For detailed diffusion coefficient calculations see methods.

**Table S6. TPSA and 3D PSA of representative conformers of 1, 7 and 9**

| <b>Polar surface area</b>            | <b>1</b> | <b>7</b> | <b>9</b> |
|--------------------------------------|----------|----------|----------|
| TPSA (Å <sup>2</sup> )               | 175.9    | 146.8    | 156.0    |
| 3D PSA in water (Å <sup>2</sup> )    | 165.1    | 137.0    | 141.1    |
| 3D PSA in octanol, (Å <sup>2</sup> ) | 162.8    | 133.4    | 143.0    |

**Table S6.** For calculation of values see Computational Compound Conformation Searches.



**Table S7. Growth rate inhibition (GR<sub>50</sub>) for 9, 9r, GDC-0077 and BYL719**

| GR <sub>50</sub> , [nM] |            |      |            |      |                  |      |               |      |             |     |           |     |             |     |
|-------------------------|------------|------|------------|------|------------------|------|---------------|------|-------------|-----|-----------|-----|-------------|-----|
| Compound                | T47D (n=4) |      | MCF7 (n=4) |      | MDA-MB-453 (n=3) |      | HCC1954 (n=3) |      | SKOV3 (n=4) |     | PC3 (n=4) |     | A2058 (n=4) |     |
|                         | mean       | SD   | mean       | SD   | mean             | SD   | mean          | SD   | mean        | SD  | mean      | SD  | mean        | SD  |
| <b>9</b>                | 0.8        | 0.1  | 5.9        | 0.8  | 0.8              | 0.4  | 5.5           | 1.4  | 75.9        | 69  | 774       | 472 | 2693        | 266 |
| <b>9r</b>               | 33.9       | 14.2 | 180        | 6.7  | 53.4             | 16.8 | 92.3          | 11.5 | 267         | 109 | 1576      | 809 | >5000       | -   |
| GDC-0077                | 12.6       | 5.3  | 142        | 78.7 | 6.3              | 1.1  | 12.7          | 3.6  | >5000       | -   | >5000     | -   | >5000       | -   |
| BYL719                  | 67.2       | 15.9 | 1616       | 592  | 101              | 26.1 | 516           | 32.7 | >5000       | -   | >5000     | -   | >5000       | -   |

**Table S8. pPKB (Ser473)/ Tubulin in-cell western IC<sub>50</sub>s for 9, 9r, GDC-0077 and BYL719**

| pPKB/Akt, IC <sub>50</sub> , [nM] |            |      |            |     |                  |      |               |      |             |      |           |      |             |      |
|-----------------------------------|------------|------|------------|-----|------------------|------|---------------|------|-------------|------|-----------|------|-------------|------|
| Compound                          | T47D (n=3) |      | MCF7 (n=3) |     | MDA-MB-453 (n=4) |      | HCC1954 (n=3) |      | SKOV3 (n=3) |      | PC3 (n=4) |      | A2058 (n=3) |      |
|                                   | mean       | SD   | mean       | SD  | mean             | SD   | mean          | SD   | mean        | SD   | mean      | SD   | mean        | SD   |
| <b>9</b>                          | 11.1       | 1.9  | 8.2        | 1.8 | 9.2              | 3.5  | 33.2          | 2.6  | 21.1        | 2.7  | 97.4      | 15.2 | 246         | 40.4 |
| <b>9r</b>                         | 43.4       | 11.8 | 38.1       | 7.0 | 35.6             | 7.5  | 87.8          | 13.3 | 45.9        | 4.4  | 183       | 16.3 | 287         | 49.2 |
| GDC-0077                          | 7.3        | 1.8  | 6.6        | 2.0 | 4.7              | 0.5  | 20.6          | 1.8  | 9.8         | 1.5  | 1212      | 479  | 2200        | 634  |
| BYL719                            | 43.8       | 6.7  | 54.6       | 8.8 | 57.4             | 11.8 | 149           | 17.7 | 76.5        | 14.3 | 1031      | 314  | 1940        | 604  |

**Table S9. pS6/tubulin in-cell western: IC<sub>50</sub>s for 9, 9r, GDC-0077 and BYL719.**

| pS6 IC <sub>50</sub> , [nM] |            |     |            |      |                  |     |               |      |             |      |           |      |             |     |
|-----------------------------|------------|-----|------------|------|------------------|-----|---------------|------|-------------|------|-----------|------|-------------|-----|
| Compound                    | T47D (n=3) |     | MCF7 (n=3) |      | MDA-MB-453 (n=3) |     | HCC1954 (n=3) |      | SKOV3 (n=3) |      | PC3 (n=3) |      | A2058 (n=4) |     |
|                             | mean       | SD  | mean       | SD   | mean             | SD  | mean          | SD   | mean        | SD   | mean      | SD   | mean        | SD  |
| <b>9</b>                    | 26.4       | 3.7 | 50.3       | 8.8  | 549              | 189 | 56.4          | 12.2 | 36.7        | 9.2  | 325       | 76.5 | 876         | 110 |
| <b>9r</b>                   | 62.1       | 2.8 | 135        | 5.2  | 607              | 136 | 117           | 30.1 | 78.7        | 17.7 | 438       | 133  | 987         | 174 |
| GDC-0077                    | 17.1       | 4.1 | 68.3       | 10.3 | >3000            | -   | 33.1          | 15.8 | 36.3        | 16.9 | 1915      | 691  | >3000       | -   |
| BYL719                      | 70.2       | 6.4 | 267        | 67.9 | 2008             | 511 | 222           | 111  | 162         | 50.1 | 1648      | 626  | >3000       | -   |

**Table S10. FOXO1 KTR translocation; IC<sub>50</sub>s for 9, 9r, GDC-0077 and BYL719.**

| FOXO1 KTR, IC <sub>50</sub> , [nM] |            |      |             |      |             |     |
|------------------------------------|------------|------|-------------|------|-------------|-----|
| Compound                           | T47D (n=3) |      | SKOV3 (n=3) |      | A2058 (n=3) |     |
|                                    | mean       | SD   | mean        | SD   | mean        | SD  |
| <b>9</b>                           | 14.9       | 3.7  | 92.5        | 26.2 | 1547        | 225 |
| <b>9r</b>                          | 121        | 37.4 | 214         | 36.3 | 2384        | 449 |
| GDC-0077                           | 44.9       | 13.1 | 578         | 93.1 | >3000       | -   |
| BYL719                             | 249        | 114  | 1279        | 273  | >3000       | -   |

**Table S11. Extended KINOMEScan data**

| ↓ DiscoverX Gene Symbol        | % remaining; 1 $\mu$ M for <b>9</b> and <b>1</b> ; other compounds 10 $\mu$ M |          |        |        |        |          |         |
|--------------------------------|-------------------------------------------------------------------------------|----------|--------|--------|--------|----------|---------|
| Compound→                      | <b>9</b>                                                                      | <b>1</b> | PQR514 | PQR309 | BYL719 | GDC-0980 | PKI-587 |
| AAK1                           | 100                                                                           | 100      | 62     | 83     | 17     | 50       | 99      |
| ABL1(E255K)-phosphorylated     | 100                                                                           | 87       | 79     | 83     | 42     | 24       | 100     |
| ABL1(F317I)-nonphosphorylated  | 76                                                                            | 100      | 84     | 100    | 2.8    | 100      | 100     |
| ABL1(F317I)-phosphorylated     | 100                                                                           | 94       | 70     | 100    | 13     | 80       | 100     |
| ABL1(F317L)-non-phosphorylated | 50                                                                            | 90       | 81     | 100    | 8.8    | 88       | 79      |
| ABL1(F317L)-phosphorylated     | 76                                                                            | 100      | 86     | 66     | 29     | 47       | 100     |
| ABL1(H396P)-nonphosphorylated  | 99                                                                            | 94       | 60     | 92     | 0.05   | 2        | 100     |
| ABL1(H396P)-phosphorylated     | 91                                                                            | 83       | 60     | 96     | 22     | 18       | 99      |
| ABL1(M351T)-phosphorylated     | 78                                                                            | 99       | 68     | 100    | 32     | 20       | 100     |
| ABL1(Q252H)-nonphosphorylated  | 96                                                                            | 94       | 70     | 89     | 32     | 7.5      | 100     |
| ABL1(Q252H)-phosphorylated     | 72                                                                            | 100      | 47     | 88     | 85     | 13       | 94      |
| ABL1(T315I)-nonphosphorylated  | 77                                                                            | 71       | 89     | 100    | 100    | 34       | 100     |
| ABL1(T315I)-phosphorylated     | 95                                                                            | 82       | 64     | 80     | 100    | 16       | 100     |
| ABL1(Y253F)-phosphorylated     | 76                                                                            | 90       | 63     | 100    | 81     | 21       | 97      |
| ABL1-nonphosphorylated         | 100                                                                           | 80       | 70     | 62     | 9.4    | 25       | 100     |
| ABL1-phosphorylated            | 97                                                                            | 93       | 61     | 86     | 30     | 23       | 99      |
| ABL2                           | 93                                                                            | 91       | 99     | 95     | 75     | 61       | 92      |
| ACVR1                          | 99                                                                            | 100      | 83     | 77     | 48     | 89       | 75      |
| ACVR1B                         | 100                                                                           | 82       | 94     | 99     | 77     | 100      | 100     |
| ACVR2A                         | 92                                                                            | 86       | 100    | 89     | 84     | 100      | 94      |
| ACVR2B                         | 88                                                                            | 91       | 100    | 76     | 96     | 86       | 83      |
| ACVRL1                         | 100                                                                           | 92       | 73     | 89     | 100    | 91       | 100     |
| ADCK3                          | 96                                                                            | 78       | 68     | 80     | 25     | 78       | 60      |
| ADCK4                          | 90                                                                            | 100      | 92     | 99     | 85     | 38       | 93      |
| AKT1                           | 100                                                                           | 94       | 94     | 75     | 44     | 96       | 93      |
| AKT2                           | 100                                                                           | 100      | 100    | 92     | 60     | 96       | 100     |
| AKT3                           | 100                                                                           | 100      | 59     | 97     | 55     | 100      | 95      |
| ALK                            | 72                                                                            | 71       | 26     | 94     | 87     | 17       | 80      |
| ALK(C1156Y)                    | 79                                                                            | 91       | 32     | 95     | 94     | 9.5      | 95      |
| ALK(L1196M)                    | 77                                                                            | 79       | 44     | 95     | 94     | 28       | 100     |
| AMPK-alpha1                    | 100                                                                           | 97       | 91     | 78     | 79     | 74       | 76      |
| AMPK-alpha2                    | 100                                                                           | 100      | 91     | 100    | 100    | 87       | 100     |
| ANKK1                          | 95                                                                            | 100      | 54     | 79     | 100    | 23       | 86      |
| ARK5                           | 100                                                                           | 99       | 94     | 97     | 92     | 72       | 82      |
| ASK1                           | 97                                                                            | 100      | 92     | 55     | 49     | 83       | 95      |
| ASK2                           | 96                                                                            | 100      | 76     | 100    | 100    | 72       | 100     |
| AURKA                          | 95                                                                            | 96       | 52     | 37     | 100    | 77       | 95      |
| AURKB                          | 100                                                                           | 56       | 91     | 81     | 100    | 100      | 100     |
| AURKC                          | 93                                                                            | 100      | 91     | 80     | 96     | 100      | 95      |
| AXL                            | 98                                                                            | 97       | 91     | 86     | 100    | 11       | 81      |
| BIKE                           | 90                                                                            | 94       | 91     | 87     | 36     | 78       | 80      |

| ↓ DiscoverX Gene Symbol | % remaining; 1 $\mu$ M for <b>9</b> and <b>1</b> ; other compounds 10 $\mu$ M |          |        |        |        |          |         |
|-------------------------|-------------------------------------------------------------------------------|----------|--------|--------|--------|----------|---------|
| Compound→               | <b>9</b>                                                                      | <b>1</b> | PQR514 | PQR309 | BYL719 | GDC-0980 | PKI-587 |
| BLK                     | 86                                                                            | 100      | 70     | 61     | 85     | 11       | 100     |
| BMPR1A                  | 100                                                                           | 80       | 93     | 100    | 74     | 73       | 72      |
| BMPR1B                  | 89                                                                            | 64       | 72     | 67     | 65     | 72       | 99      |
| BMPR2                   | 98                                                                            | 71       | 81     | 82     | 100    | 93       | 97      |
| BMX                     | 96                                                                            | 99       | 86     | 100    | 94     | 34       | 93      |
| BRAF                    | 90                                                                            | 92       | 36     | 75     | 61     | 78       | 20      |
| BRAF(V600E)             | 81                                                                            | 89       | 42     | 65     | 67     | 77       | 14      |
| BRK                     | 97                                                                            | 100      | 97     | 100    | 83     | 57       | 84      |
| BRSK1                   | 100                                                                           | 100      | 91     | 98     | 83     | 80       | 78      |
| BRSK2                   | 100                                                                           | 100      | 92     | 61     | 74     | 95       | 97      |
| BTK                     | 100                                                                           | 66       | 26     | 83     | 85     | 4.5      | 93      |
| BUB1                    | 93                                                                            | 77       | 99     | 100    | 100    | 99       | 100     |
| CAMK1                   | 100                                                                           | 86       | 82     | 76     | 53     | 35       | 77      |
| CAMK1B                  | 97                                                                            | 100      |        |        |        |          |         |
| CAMK1D                  | 100                                                                           | 100      | 100    | 83     | 72     | 78       | 91      |
| CAMK1G                  | 100                                                                           | 100      | 65     | 93     | 83     | 67       | 99      |
| CAMK2A                  | 100                                                                           | 96       | 64     | 88     | 68     | 80       | 70      |
| CAMK2B                  | 100                                                                           | 100      | 69     | 92     | 71     | 88       | 92      |
| CAMK2D                  | 100                                                                           | 100      | 66     | 100    | 88     | 93       | 94      |
| CAMK2G                  | 100                                                                           | 100      | 73     | 84     | 85     | 77       | 91      |
| CAMK4                   | 100                                                                           | 86       | 66     | 84     | 100    | 76       | 100     |
| CAMKK1                  | 98                                                                            | 96       | 70     | 100    | 83     | 73       | 93      |
| CAMKK2                  | 99                                                                            | 95       | 65     | 100    | 94     | 74       | 98      |
| CASK                    | 93                                                                            | 69       | 77     | 100    | 98     | 86       | 100     |
| CDC2L1                  | 100                                                                           | 100      | 95     | 100    | 100    | 100      | 91      |
| CDC2L2                  | 94                                                                            | 97       | 89     | 100    | 100    | 92       | 100     |
| CDC2L5                  | 96                                                                            | 95       | 95     | 80     | 94     | 100      | 96      |
| CDK11                   | 99                                                                            | 99       | 69     | 70     | 21     | 100      | 92      |
| CDK2                    | 100                                                                           | 100      | 100    | 93     | 96     | 93       | 88      |
| CDK3                    | 84                                                                            | 95       | 88     | 99     | 100    | 96       | 84      |
| CDK4                    | 100                                                                           | 92       |        |        |        |          |         |
| CDK4-cyclinD1           | 90                                                                            | 83       | 100    | 91     | 90     | 94       | 97      |
| CDK4-cyclinD3           | 75                                                                            | 100      | 87     | 97     | 100    | 100      | 100     |
| CDK5                    | 100                                                                           | 100      | 100    | 85     | 100    | 73       | 98      |
| CDK7                    | 97                                                                            | 94       | 56     | 100    | 100    | 45       | 86      |
| CDK8                    | 96                                                                            | 100      | 100    | 100    | 52     | 87       | 84      |
| CDK9                    | 100                                                                           | 98       | 99     | 70     | 100    | 99       | 96      |
| CDKL1                   | 82                                                                            | 90       | 97     | 93     | 100    | 100      | 100     |
| CDKL2                   | 100                                                                           | 100      | 99     | 100    | 97     | 95       | 85      |
| CDKL3                   | 100                                                                           | 100      | 74     | 85     | 97     | 100      | 99      |
| CDKL5                   | 89                                                                            | 100      | 67     | 83     | 100    | 100      | 100     |
| CHEK1                   | 96                                                                            | 88       | 67     | 84     | 100    | 98       | 98      |
| CHEK2                   | 94                                                                            | 88       | 75     | 100    | 77     | 9.1      | 93      |
| CIT                     | 91                                                                            | 100      | 91     | 100    | 94     | 37       | 65      |

| ↓ DiscoverX Gene Symbol   | % remaining; 1 $\mu$ M for <b>9</b> and <b>1</b> ; other compounds 10 $\mu$ M |          |        |        |        |          |         |
|---------------------------|-------------------------------------------------------------------------------|----------|--------|--------|--------|----------|---------|
| Compound→                 | <b>9</b>                                                                      | <b>1</b> | PQR514 | PQR309 | BYL719 | GDC-0980 | PKI-587 |
| CLK1                      | 92                                                                            | 93       | 58     | 55     | 5.2    | 95       | 50      |
| CLK2                      | 79                                                                            | 91       | 41     | 84     | 3.4    | 60       | 90      |
| CLK3                      | 76                                                                            | 97       | 90     | 100    | 8.8    | 96       | 100     |
| CLK4                      | 100                                                                           | 100      | 30     | 32     | 4.2    | 87       | 29      |
| CSF1R                     | 86                                                                            | 77       | 14     | 7.4    | 68     | 12       | 98      |
| CSF1R-autoinhibited       | 29                                                                            | 20       | 2.1    | 2.8    | 98     | 19       | 100     |
| CSK                       | 100                                                                           | 100      | 73     | 76     | 75     | 25       | 81      |
| CSNK1A1                   | 97                                                                            | 89       | 72     | 91     | 89     | 97       | 100     |
| CSNK1A1L                  | 97                                                                            | 100      | 74     | 95     | 79     | 100      | 99      |
| CSNK1D                    | 100                                                                           | 100      | 90     | 76     | 36     | 90       | 83      |
| CSNK1E                    | 90                                                                            | 87       | 38     | 78     | 62     | 83       | 3.2     |
| CSNK1G1                   | 100                                                                           | 99       | 79     | 100    | 86     | 80       | 75      |
| CSNK1G2                   | 99                                                                            | 100      | 85     | 82     | 100    | 73       | 56      |
| CSNK1G3                   | 100                                                                           | 100      | 95     | 100    | 93     | 85       | 81      |
| CSNK2A1                   | 92                                                                            | 75       | 79     | 59     | 97     | 97       | 91      |
| CSNK2A2                   | 88                                                                            | 100      | 69     | 100    | 100    | 89       | 95      |
| CTK                       | 100                                                                           | 78       | 100    | 91     | 100    | 57       | 97      |
| DAPK1                     | 91                                                                            | 96       | 94     | 86     | 85     | 82       | 89      |
| DAPK2                     | 100                                                                           | 95       | 76     | 94     | 59     | 75       | 81      |
| DAPK3                     | 100                                                                           | 89       | 80     | 94     | 64     | 78       | 78      |
| DCAMKL1                   | 100                                                                           | 59       | 86     | 84     | 84     | 70       | 73      |
| DCAMKL2                   | 92                                                                            | 98       | 86     | 100    | 100    | 100      | 100     |
| DCAMKL3                   | 100                                                                           | 96       | 73     | 85     | 100    | 100      | 100     |
| DDR1                      | 99                                                                            | 100      | 69     | 65     | 100    | 90       | 69      |
| DDR2                      | 100                                                                           | 83       | 57     | 100    | 100    | 66       | 73      |
| DLK                       | 72                                                                            | 97       | 91     | 81     | 86     | 15       | 87      |
| DMPK                      | 98                                                                            | 87       | 76     | 100    | 85     | 40       | 97      |
| DMPK2                     | 100                                                                           | 100      | 77     | 81     | 100    | 100      | 100     |
| DRAK1                     | 77                                                                            | 100      | 89     | 97     | 11     | 67       | 91      |
| DRAK2                     | 100                                                                           | 97       | 85     | 79     | 61     | 63       | 63      |
| DYRK1A                    | 85                                                                            | 94       | 48     | 100    | 30     | 96       | 90      |
| DYRK1B                    | 100                                                                           | 98       | 76     | 61     | 53     | 100      | 97      |
| DYRK2                     | 99                                                                            | 80       | 82     | 100    | 74     | 76       | 94      |
| EGFR                      | 89                                                                            | 100      | 56     | 73     | 90     | 11       | 78      |
| EGFR(E746-A750del)        | 100                                                                           | 95       | 77     | 95     | 88     | 14       | 79      |
| EGFR(G719C)               | 98                                                                            | 87       | 56     | 54     | 94     | 30       | 98      |
| EGFR(G719S)               | 97                                                                            | 97       | 75     | 64     | 100    | 40       | 100     |
| EGFR(L747-E749del, A750P) | 93                                                                            | 100      | 63     | 85     | 100    | 17       | 98      |
| EGFR(L747-S752del, P753S) | 100                                                                           | 82       | 85     | 90     | 94     | 31       | 77      |
| EGFR(L747-T751del,Sins)   | 100                                                                           | 98       | 77     | 84     | 97     | 25       | 100     |
| EGFR(L858R)               | 89                                                                            | 100      | 40     | 90     | 100    | 18       | 100     |
| EGFR(L858R, T790M)        | 98                                                                            | 97       | 74     | 78     | 90     | 3        | 85      |
| EGFR(L861Q)               | 100                                                                           | 93       | 77     | 63     | 98     | 15       | 100     |
| EGFR(S752-I759del)        | 100                                                                           | 92       | 88     | 73     | 93     | 22       | 100     |

| ↓ DiscoverX Gene Symbol | % remaining; 1 $\mu$ M for <b>9</b> and <b>1</b> ; other compounds 10 $\mu$ M |          |        |        |        |          |         |
|-------------------------|-------------------------------------------------------------------------------|----------|--------|--------|--------|----------|---------|
| Compound→               | <b>9</b>                                                                      | <b>1</b> | PQR514 | PQR309 | BYL719 | GDC-0980 | PKI-587 |
| EGFR(T790M)             | 86                                                                            | 90       | 51     | 92     | 100    | 4.3      | 100     |
| EIF2AK1                 | 81                                                                            | 94       | 85     | 100    | 100    | 100      | 100     |
| EPHA1                   | 100                                                                           | 100      | 68     | 76     | 100    | 72       | 100     |
| EPHA2                   | 100                                                                           | 95       | 94     | 100    | 98     | 100      | 100     |
| EPHA3                   | 94                                                                            | 90       | 69     | 79     | 92     | 50       | 99      |
| EPHA4                   | 100                                                                           | 94       | 94     | 83     | 100    | 98       | 92      |
| EPHA5                   | 100                                                                           | 100      | 97     | 98     | 100    | 78       | 96      |
| EPHA6                   | 100                                                                           | 100      | 94     | 89     | 100    | 100      | 90      |
| EPHA7                   | 85                                                                            | 100      | 86     | 93     | 83     | 88       | 89      |
| EPHA8                   | 88                                                                            | 100      | 100    | 80     | 80     | 80       | 78      |
| EPHB1                   | 100                                                                           | 100      | 98     | 70     | 91     | 92       | 92      |
| EPHB2                   | 94                                                                            | 95       | 95     | 95     | 94     | 78       | 92      |
| EPHB3                   | 100                                                                           | 98       | 96     | 84     | 96     | 100      | 79      |
| EPHB4                   | 100                                                                           | 100      | 97     | 84     | 98     | 77       | 91      |
| EPHB6                   | 59                                                                            | 65       | 50     | 54     | 82     | 8.6      | 97      |
| ERBB2                   | 100                                                                           | 70       | 65     | 65     | 100    | 72       | 97      |
| ERBB3                   | 100                                                                           | 84       | 69     | 61     | 96     | 29       | 92      |
| ERBB4                   | 100                                                                           | 100      | 60     | 79     | 100    | 24       | 96      |
| ERK1                    | 100                                                                           | 100      | 89     | 77     | 100    | 98       | 100     |
| ERK2                    | 100                                                                           | 98       | 98     | 89     | 100    | 79       | 94      |
| ERK3                    | 100                                                                           | 96       | 88     | 78     | 100    | 100      | 100     |
| ERK4                    | 100                                                                           | 97       | 99     | 100    | 100    | 100      | 100     |
| ERK5                    | 100                                                                           | 100      | 97     | 86     | 100    | 99       | 82      |
| ERK8                    | 100                                                                           | 97       | 100    | 100    | 82     | 88       | 82      |
| ERN1                    | 100                                                                           | 100      | 80     | 73     | 100    | 73       | 100     |
| FAK                     | 100                                                                           | 100      | 100    | 79     | 99     | 83       | 99      |
| FER                     | 96                                                                            | 87       | 67     | 96     | 100    | 9.1      | 100     |
| FES                     | 100                                                                           | 100      | 91     | 76     | 100    | 94       | 84      |
| FGFR1                   | 100                                                                           | 100      | 94     | 100    | 63     | 100      | 94      |
| FGFR2                   | 100                                                                           | 89       | 90     | 93     | 100    | 100      | 100     |
| FGFR3                   | 100                                                                           | 96       | 88     | 100    | 100    | 91       | 98      |
| FGFR3(G697C)            | 100                                                                           | 99       | 83     | 65     | 97     | 87       | 99      |
| FGFR4                   | 97                                                                            | 100      | 100    | 84     | 75     | 89       | 75      |
| FGR                     | 100                                                                           | 97       | 97     | 86     | 95     | 14       | 83      |
| FLT1                    | 96                                                                            | 99       | 91     | 98     | 99     | 62       | 82      |
| FLT3                    | 86                                                                            | 91       | 88     | 52     | 72     | 30       | 78      |
| FLT3(D835H)             | 74                                                                            | 100      | 55     | 57     | 85     | 16       | 100     |
| FLT3(D835V)             | 49                                                                            | 61       |        |        |        |          |         |
| FLT3(D835Y)             | 87                                                                            | 99       | 48     | 54     | 100    | 11       | 96      |
| FLT3(ITD)               | 95                                                                            | 97       | 77     | 90     | 100    | 19       | 97      |
| FLT3(ITD,D835V)         | 100                                                                           | 87       |        |        |        |          |         |
| FLT3(ITD,F691L)         | 44                                                                            | 95       |        |        |        |          |         |
| FLT3(K663Q)             | 61                                                                            | 100      | 48     | 69     | 83     | 18       | 89      |
| FLT3(N841I)             | 95                                                                            | 100      | 46     | 35     | 75     | 34       | 100     |

| ↓ DiscoverX Gene Symbol      | % remaining; 1 $\mu$ M for <b>9</b> and <b>1</b> ; other compounds 10 $\mu$ M |          |        |        |        |          |         |
|------------------------------|-------------------------------------------------------------------------------|----------|--------|--------|--------|----------|---------|
| Compound→                    | <b>9</b>                                                                      | <b>1</b> | PQR514 | PQR309 | BYL719 | GDC-0980 | PKI-587 |
| FLT3(R834Q)                  | 77                                                                            | 84       | 95     | 87     | 88     | 60       | 100     |
| FLT3-autoinhibited           | 92                                                                            | 99       | 50     | 78     | 100    | 58       | 100     |
| FLT4                         | 83                                                                            | 96       | 77     | 83     | 91     | 86       | 82      |
| FRK                          | 96                                                                            | 100      | 100    | 100    | 82     | 74       | 88      |
| FYN                          | 94                                                                            | 100      | 100    | 100    | 77     | 23       | 73      |
| GAK                          | 91                                                                            | 100      | 75     | 97     | 4.8    | 70       | 98      |
| GCN2(Kin.Dom.2,S808G)        | 100                                                                           | 100      | 71     | 100    | 100    | 3.4      | 100     |
| GRK1                         | 100                                                                           | 67       | 86     | 100    | 100    | 96       | 100     |
| GRK2                         | 100                                                                           | 100      |        |        |        |          |         |
| GRK3                         | 73                                                                            | 100      |        |        |        |          |         |
| GRK4                         | 58                                                                            | 100      | 74     | 91     | 85     | 68       | 60      |
| GRK7                         | 100                                                                           | 87       | 67     | 100    | 100    | 89       | 100     |
| GSK3A                        | 93                                                                            | 92       | 91     | 61     | 100    | 98       | 88      |
| GSK3B                        | 99                                                                            | 74       | 74     | 92     | 100    | 100      | 100     |
| HASPIN                       | 71                                                                            | 75       | 71     | 70     | 78     | 98       | 44      |
| HCK                          | 100                                                                           | 86       | 77     | 95     | 98     | 1.6      | 100     |
| HIPK1                        | 96                                                                            | 97       | 69     | 76     | 53     | 44       | 82      |
| HIPK2                        | 75                                                                            | 83       | 59     | 100    | 71     | 19       | 34      |
| HIPK3                        | 100                                                                           | 100      | 56     | 78     | 98     | 57       | 89      |
| HIPK4                        | 100                                                                           | 100      | 100    | 86     | 7.5    | 91       | 86      |
| HPK1                         | 100                                                                           | 100      | 88     | 66     | 90     | 12       | 67      |
| HUNK                         | 79                                                                            | 79       | 78     | 100    | 100    | 91       | 64      |
| ICK                          | 75                                                                            | 95       | 72     | 100    | 100    | 100      | 100     |
| IGF1R                        | 92                                                                            | 100      | 78     | 67     | 100    | 31       | 100     |
| IKK-alpha                    | 76                                                                            | 71       | 39     | 100    | 100    | 94       | 64      |
| IKK-beta                     | 100                                                                           | 73       | 77     | 100    | 100    | 100      | 100     |
| IKK-epsilon                  | 84                                                                            | 71       | 99     | 100    | 95     | 51       | 85      |
| INSR                         | 94                                                                            | 99       | 50     | 86     | 100    | 7.3      | 100     |
| INSRR                        | 87                                                                            | 96       | 80     | 92     | 85     | 19       | 72      |
| IRAK1                        | 100                                                                           | 100      | 50     | 100    | 77     | 78       | 100     |
| IRAK3                        | 97                                                                            | 89       | 83     | 68     | 16     | 61       | 79      |
| IRAK4                        | 84                                                                            | 95       | 72     | 100    | 90     | 100      | 99      |
| ITK                          | 66                                                                            | 99       | 44     | 88     | 84     | 19       | 84      |
| JAK1(JH1domain-catalytic)    | 91                                                                            | 100      | 90     | 80     | 100    | 96       | 100     |
| JAK1(JH2domain-pseudokinase) | 1.2                                                                           | 32       | 0.05   | 20     | 100    | 0        | 100     |
| JAK2(JH1domain-catalytic)    | 90                                                                            | 88       | 65     | 88     | 100    | 7.4      | 100     |
| JAK3(JH1domain-catalytic)    | 100                                                                           | 88       | 46     | 63     | 94     | 8.7      | 83      |
| JNK1                         | 93                                                                            | 93       | 86     | 74     | 55     | 47       | 100     |
| JNK2                         | 78                                                                            | 89       | 83     | 89     | 93     | 95       | 100     |
| JNK3                         | 80                                                                            | 100      | 90     | 83     | 59     | 93       | 100     |
| KIT                          | 96                                                                            | 93       | 20     | 29     | 100    | 2        | 81      |
| KIT(A829P)                   | 63                                                                            | 100      | 80     | 85     | 88     | 49       | 97      |
| KIT(D816H)                   | 57                                                                            | 100      | 89     | 81     | 86     | 57       | 94      |

| ↓ DiscoverX Gene Symbol | % remaining; 1 $\mu$ M for <b>9</b> and <b>1</b> ; other compounds 10 $\mu$ M |          |        |        |        |          |         |
|-------------------------|-------------------------------------------------------------------------------|----------|--------|--------|--------|----------|---------|
| Compound→               | <b>9</b>                                                                      | <b>1</b> | PQR514 | PQR309 | BYL719 | GDC-0980 | PKI-587 |
| KIT(D816V)              | 90                                                                            | 79       | 58     | 94     | 86     | 40       | 84      |
| KIT(L576P)              | 82                                                                            | 53       | 7.4    | 6.5    | 100    | 3        | 98      |
| KIT(V559D)              | 95                                                                            | 78       | 18     | 21     | 100    | 1.1      | 94      |
| KIT(V559D,T670I)        | 95                                                                            | 82       | 26     | 64     | 84     | 5.2      | 99      |
| KIT(V559D,V654A)        | 98                                                                            | 100      | 43     | 45     | 98     | 7.6      | 87      |
| KIT-autoinhibited       | 63                                                                            | 35       | 4.8    | 17     | 100    | 43       | 100     |
| LATS1                   | 96                                                                            | 100      | 82     | 96     | 100    | 59       | 39      |
| LATS2                   | 87                                                                            | 100      | 89     | 100    | 100    | 96       | 28      |
| LCK                     | 94                                                                            | 90       | 46     | 93     | 88     | 9.5      | 93      |
| LIMK1                   | 98                                                                            | 100      | 86     | 97     | 82     | 92       | 87      |
| LIMK2                   | 100                                                                           | 97       | 81     | 62     | 100    | 100      | 100     |
| LKB1                    | 77                                                                            | 100      | 91     | 92     | 82     | 100      | 79      |
| LOK                     | 100                                                                           | 95       | 64     | 72     | 85     | 28       | 76      |
| LRRK2                   | 89                                                                            | 63       | 97     | 91     | 96     | 98       | 100     |
| LRRK2(G2019S)           | 92                                                                            | 79       | 91     | 80     | 92     | 82       | 93      |
| LTK                     | 91                                                                            | 100      | 26     | 86     | 87     | 10       | 76      |
| LYN                     | 90                                                                            | 100      | 95     | 85     | 100    | 43       | 97      |
| LZK                     | 78                                                                            | 100      | 100    | 97     | 87     | 20       | 95      |
| MAK                     | 100                                                                           | 100      | 100    | 79     | 86     | 91       | 93      |
| MAP3K1                  | 100                                                                           | 93       | 77     | 100    | 100    | 93       | 100     |
| MAP3K15                 | 97                                                                            | 100      | 61     | 100    | 100    | 96       | 100     |
| MAP3K2                  | 97                                                                            | 69       | 71     | 100    | 100    | 13       | 80      |
| MAP3K3                  | 100                                                                           | 99       | 72     | 79     | 100    | 10       | 100     |
| MAP3K4                  | 100                                                                           | 100      | 82     | 68     | 84     | 95       | 71      |
| MAP4K2                  | 81                                                                            | 100      | 78     | 90     | 98     | 9.8      | 90      |
| MAP4K3                  | 89                                                                            | 86       | 87     | 71     | 97     | 51       | 92      |
| MAP4K4                  | 85                                                                            | 80       | 100    | 99     | 86     | 78       | 83      |
| MAP4K5                  | 96                                                                            | 95       | 100    | 89     | 100    | 93       | 100     |
| MAPKAPK2                | 90                                                                            | 100      | 85     | 80     | 100    | 96       | 85      |
| MAPKAPK5                | 100                                                                           | 92       | 72     | 89     | 92     | 75       | 64      |
| MARK1                   | 100                                                                           | 100      | 88     | 75     | 67     | 67       | 97      |
| MARK2                   | 77                                                                            | 90       | 77     | 87     | 80     | 54       | 85      |
| MARK3                   | 100                                                                           | 65       | 100    | 78     | 91     | 67       | 97      |
| MARK4                   | 100                                                                           | 97       | 90     | 76     | 64     | 77       | 100     |
| MAST1                   | 97                                                                            | 100      | 90     | 100    | 83     | 69       | 94      |
| MEK1                    | 99                                                                            | 69       | 83     | 72     | 100    | 26       | 100     |
| MEK2                    | 99                                                                            | 59       | 77     | 98     | 100    | 7        | 100     |
| MEK3                    | 80                                                                            | 59       | 78     | 100    | 100    | 99       | 100     |
| MEK4                    | 93                                                                            | 100      | 96     | 100    | 100    | 100      | 100     |
| MEK5                    | 96                                                                            | 77       | 39     | 100    | 100    | 0.4      | 100     |
| MEK6                    | 100                                                                           | 100      | 92     | 70     | 100    | 68       | 60      |
| MELK                    | 100                                                                           | 100      | 82     | 64     | 64     | 73       | 76      |
| MERTK                   | 80                                                                            | 94       | 87     | 100    | 91     | 37       | 87      |
| MET                     | 94                                                                            | 75       | 63     | 60     | 100    | 63       | 95      |



| ↓ DiscoverX Gene Symbol | % remaining; 1 μM for <b>9</b> and <b>1</b> ; other compounds 10 μM |          |        |        |        |          |         |
|-------------------------|---------------------------------------------------------------------|----------|--------|--------|--------|----------|---------|
| Compound→               | <b>9</b>                                                            | <b>1</b> | PQR514 | PQR309 | BYL719 | GDC-0980 | PKI-587 |
| MET(M1250T)             | 97                                                                  | 95       | 100    | 93     | 100    | 83       | 98      |
| MET(Y1235D)             | 100                                                                 | 98       | 92     | 100    | 94     | 68       | 74      |
| MINK                    | 100                                                                 | 99       | 66     | 86     | 100    | 24       | 64      |
| MKK7                    | 74                                                                  | 98       | 61     | 100    | 100    | 89       | 91      |
| MKNK1                   | 97                                                                  | 83       | 45     | 100    | 99     | 100      | 100     |
| MKNK2                   | 84                                                                  | 100      | 56     | 91     | 93     | 100      | 65      |
| MLCK                    | 99                                                                  | 92       | 84     | 94     | 98     | 74       | 62      |
| MLK1                    | 92                                                                  | 96       | 42     | 87     | 91     | 3.2      | 97      |
| MLK2                    | 100                                                                 | 99       | 53     | 59     | 43     | 41       | 100     |
| MLK3                    | 90                                                                  | 79       | 47     | 100    | 91     | 17       | 89      |
| MRCKA                   | 100                                                                 | 100      | 95     | 100    | 77     | 88       | 74      |
| MRCKB                   | 100                                                                 | 99       | 95     | 89     | 100    | 94       | 83      |
| MST1                    | 100                                                                 | 92       | 86     | 83     | 100    | 87       | 84      |
| MST1R                   | 100                                                                 | 100      | 96     | 69     | 92     | 81       | 91      |
| MST2                    | 100                                                                 | 97       | 95     | 72     | 100    | 92       | 91      |
| MST3                    | 100                                                                 | 98       | 91     | 92     | 97     | 93       | 96      |
| MST4                    | 100                                                                 | 100      | 91     | 56     | 100    | 97       | 100     |
| MTOR                    | 4.5                                                                 | 1.2      | 0      | 0      | 12     | 0.05     | 0       |
| MUSK                    | 100                                                                 | 79       | 92     | 100    | 80     | 90       | 74      |
| MYLK                    | 100                                                                 | 61       | 78     | 95     | 66     | 73       | 37      |
| MYLK2                   | 100                                                                 | 97       | 92     | 97     | 88     | 87       | 100     |
| MYLK4                   | 100                                                                 | 100      | 87     | 77     | 75     | 96       | 95      |
| MYO3A                   | 100                                                                 | 100      | 92     | 86     | 85     | 94       | 64      |
| MYO3B                   | 93                                                                  | 96       | 99     | 100    | 100    | 80       | 83      |
| NDR1                    | 92                                                                  | 88       | 66     | 71     | 100    | 26       | 54      |
| NDR2                    | 73                                                                  | 97       | 72     | 93     | 88     | 44       | 62      |
| NEK1                    | 90                                                                  | 96       | 99     | 76     | 70     | 85       | 62      |
| NEK10                   | 100                                                                 | 76       | 66     | 100    | 78     | 5        | 61      |
| NEK11                   | 65                                                                  | 69       | 89     | 100    | 87     | 50       | 82      |
| NEK2                    | 94                                                                  | 95       | 87     | 100    | 97     | 24       | 100     |
| NEK3                    | 96                                                                  | 51       | 78     | 100    | 98     | 100      | 100     |
| NEK4                    | 94                                                                  | 81       | 75     | 100    | 97     | 9.2      | 100     |
| NEK5                    | 100                                                                 | 100      | 92     | 100    | 60     | 100      | 100     |
| NEK6                    | 100                                                                 | 95       | 100    | 100    | 66     | 84       | 95      |
| NEK7                    | 89                                                                  | 100      | 70     | 100    | 39     | 87       | 100     |
| NEK9                    | 74                                                                  | 100      | 92     | 100    | 40     | 90       | 90      |
| NIK                     | 100                                                                 | 89       | 70     | 100    | 100    | 73       | 99      |
| NIM1                    | 85                                                                  | 100      | 68     | 92     | 100    | 100      | 98      |
| NLK                     | 100                                                                 | 94       | 88     | 99     | 83     | 75       | 68      |
| OSR1                    | 88                                                                  | 100      | 54     | 100    | 100    | 100      | 100     |
| p38-alpha               | 100                                                                 | 100      | 82     | 98     | 88     | 92       | 98      |
| p38-beta                | 100                                                                 | 89       | 98     | 95     | 97     | 79       | 92      |
| p38-delta               | 100                                                                 | 99       | 95     | 55     | 74     | 72       | 73      |
| p38-gamma               | 99                                                                  | 96       | 100    | 74     | 100    | 83       | 100     |

| ↓ DiscoverX Gene Symbol | % remaining; 1 $\mu$ M for <b>9</b> and <b>1</b> ; other compounds 10 $\mu$ M |          |        |        |        |          |         |
|-------------------------|-------------------------------------------------------------------------------|----------|--------|--------|--------|----------|---------|
| Compound→               | <b>9</b>                                                                      | <b>1</b> | PQR514 | PQR309 | BYL719 | GDC-0980 | PKI-587 |
| PAK1                    | 100                                                                           | 92       | 63     | 94     | 80     | 53       | 93      |
| PAK2                    | 97                                                                            | 100      | 58     | 88     | 98     | 65       | 100     |
| PAK3                    | 83                                                                            | 96       | 82     | 86     | 100    | 51       | 100     |
| PAK4                    | 88                                                                            | 99       | 58     | 93     | 84     | 3.9      | 100     |
| PAK6                    | 100                                                                           | 100      | 79     | 83     | 75     | 47       | 92      |
| PAK7                    | 84                                                                            | 79       | 52     | 86     | 92     | 0.65     | 87      |
| PCTK1                   | 90                                                                            | 100      | 90     | 100    | 100    | 100      | 100     |
| PCTK2                   | 100                                                                           | 89       | 100    | 98     | 100    | 95       | 76      |
| PCTK3                   | 91                                                                            | 95       | 82     | 100    | 100    | 98       | 100     |
| PDGFRA                  | 86                                                                            | 91       | 80     | 85     | 100    | 73       | 100     |
| PDGFRB                  | 100                                                                           | 100      | 69     | 97     | 100    | 8.9      | 75      |
| PDPK1                   | 100                                                                           | 93       | 83     | 53     | 100    | 96       | 80      |
| PFCDPK1(P.falciparum)   | 100                                                                           | 81       | 57     | 100    | 87     | 67       | 84      |
| PFPK5(P.falciparum)     | 92                                                                            | 65       | 64     | 78     | 100    | 99       | 100     |
| PFTAIRE2                | 95                                                                            | 100      | 94     | 100    | 99     | 86       | 93      |
| PFTK1                   | 92                                                                            | 100      | 82     | 93     | 100    | 96       | 100     |
| PHKG1                   | 92                                                                            | 100      | 94     | 91     | 76     | 82       | 98      |
| PHKG2                   | 100                                                                           | 89       | 67     | 89     | 79     | 87       | 67      |
| PIK3C2B                 | 46                                                                            | 21       | 0.75   | 41     | 4      | 31       | 0       |
| PIK3C2G                 | 79                                                                            | 16       | 0.75   | 7      | 9.6    | 12       | 0.2     |
| PIK3CA                  | 0                                                                             | 0.4      | 0      | 0.1    | 0.05   | 0        | 0       |
| PIK3CA(C420R)           | 0                                                                             | 0.6      | 0      | 0      | 0.05   | 0        | 0.15    |
| PIK3CA(E542K)           | 1.2                                                                           | 0        | 0      | 0.2    | 0.1    | 0.05     | 0       |
| PIK3CA(E545A)           | 0                                                                             | 0.5      | 0      | 0.1    | 0.05   | 0        | 0.15    |
| PIK3CA(E545K)           | 0                                                                             | 0        | 0      | 0.2    | 0.2    | 0.05     | 0       |
| PIK3CA(H1047L)          | 0                                                                             | 0.45     | 0      | 14     | 3.5    | 2        | 2.3     |
| PIK3CA(H1047Y)          | 0.15                                                                          | 5.9      | 0      | 1.4    | 1      | 0.35     | 1.8     |
| PIK3CA(I800L)           | 0.2                                                                           | 0        | 0.05   | 0.4    | 1.2    | 0.05     | 0.75    |
| PIK3CA(M1043I)          | 11                                                                            | 0        | 0      | 13     | 1.5    | 0.65     | 3.5     |
| PIK3CA(Q546K)           | 4.5                                                                           | 0        | 0      | 0.5    | 0.15   | 0.05     | 0.2     |
| PIK3CB                  | 0.55                                                                          | 0.05     | 0      | 2.6    | 2.9    | 0.3      | 0.25    |
| PIK3CD                  | 0.75                                                                          | 19       | 0      | 2.6    | 0.15   | 0        | 4.8     |
| PIK3CG                  | 0.55                                                                          | 0.1      | 0      | 1      | 0      | 0        | 0.1     |
| PIK4CB                  | 100                                                                           | 100      | 75     | 95     | 1.7    | 100      | 95      |
| PIKFYVE                 | 71                                                                            | 74       |        |        |        |          |         |
| PIM1                    | 100                                                                           | 95       | 96     | 85     | 82     | 82       | 100     |
| PIM2                    | 100                                                                           | 82       | 92     | 86     | 79     | 87       | 66      |
| PIM3                    | 100                                                                           | 97       | 89     | 78     | 91     | 85       | 100     |
| PIP5K1A                 | 100                                                                           | 100      | 100    | 82     | 59     | 8.9      | 27      |
| PIP5K1C                 | 95                                                                            | 85       | 100    | 100    | 100    | 27       | 80      |
| PIP5K2B                 | 86                                                                            | 99       | 100    | 94     | 100    | 84       | 99      |
| PIP5K2C                 | 90                                                                            | 95       | 84     | 96     | 100    | 96       | 83      |
| PKAC-alpha              | 92                                                                            | 100      | 85     | 67     | 100    | 70       | 84      |
| PKAC-beta               | 93                                                                            | 90       | 61     | 83     | 95     | 72       | 94      |

| ↓ DiscoverX Gene Symbol       | % remaining; 1 $\mu$ M for <b>9</b> and <b>1</b> ; other compounds 10 $\mu$ M |          |        |        |        |          |         |
|-------------------------------|-------------------------------------------------------------------------------|----------|--------|--------|--------|----------|---------|
| Compound→                     | <b>9</b>                                                                      | <b>1</b> | PQR514 | PQR309 | BYL719 | GDC-0980 | PKI-587 |
| PKMYT1                        | 92                                                                            | 92       | 98     | 66     | 100    | 98       | 87      |
| PKN1                          | 100                                                                           | 83       | 49     | 73     | 87     | 71       | 93      |
| PKN2                          | 94                                                                            | 84       | 100    | 100    | 87     | 93       | 100     |
| PKNB(M.tuberculosis)          | 91                                                                            | 67       | 66     | 100    | 100    | 100      | 66      |
| PLK1                          | 100                                                                           | 99       | 66     | 49     | 100    | 100      | 95      |
| PLK2                          | 100                                                                           | 95       | 73     | 65     | 88     | 67       | 89      |
| PLK3                          | 100                                                                           | 58       | 83     | 96     | 97     | 69       | 97      |
| PLK4                          | 87                                                                            | 89       | 69     | 81     | 100    | 57       | 100     |
| PRKCD                         | 100                                                                           | 100      | 97     | 100    | 65     | 62       | 76      |
| PRKCE                         | 85                                                                            | 79       | 96     | 42     | 100    | 26       | 73      |
| PRKCH                         | 100                                                                           | 100      | 91     | 100    | 100    | 45       | 86      |
| PRKCI                         | 100                                                                           | 95       | 95     | 92     | 100    | 100      | 100     |
| PRKCQ                         | 99                                                                            | 83       | 37     | 100    | 100    | 63       | 97      |
| PRKD1                         | 100                                                                           | 90       | 80     | 100    | 100    | 100      | 100     |
| PRKD2                         | 94                                                                            | 100      | 99     | 90     | 99     | 100      | 89      |
| PRKD3                         | 100                                                                           | 93       | 67     | 85     | 100    | 98       | 84      |
| PRKG1                         | 96                                                                            | 87       | 79     | 100    | 77     | 85       | 68      |
| PRKG2                         | 100                                                                           | 69       | 90     | 92     | 99     | 91       | 89      |
| PRKR                          | 100                                                                           | 100      | 91     | 72     | 96     | 20       | 98      |
| PRKX                          | 99                                                                            | 100      | 90     | 75     | 74     | 59       | 73      |
| PRP4                          | 84                                                                            | 100      | 100    | 79     | 99     | 75       | 84      |
| PYK2                          | 95                                                                            | 100      | 70     | 100    | 98     | 58       | 100     |
| QSK                           | 98                                                                            | 76       | 72     | 84     | 100    | 94       | 100     |
| RAF1                          | 100                                                                           | 93       | 98     | 92     | 100    | 100      | 100     |
| RET                           | 91                                                                            | 94       | 100    | 80     | 81     | 68       | 76      |
| RET(M918T)                    | 79                                                                            | 97       | 78     | 84     | 87     | 62       | 99      |
| RET(V804L)                    | 82                                                                            | 100      | 88     | 86     | 90     | 63       | 92      |
| RET(V804M)                    | 98                                                                            | 100      | 73     | 86     | 90     | 57       | 87      |
| RIOK1                         | 71                                                                            | 98       | 82     | 97     | 43     | 24       | 63      |
| RIOK2                         | 100                                                                           | 83       | 51     | 90     | 100    | 2.1      | 67      |
| RIOK3                         | 100                                                                           | 100      | 98     | 84     | 81     | 79       | 61      |
| RIPK1                         | 100                                                                           | 100      | 91     | 84     | 100    | 100      | 100     |
| RIPK2                         | 95                                                                            | 100      | 100    | 100    | 60     | 76       | 72      |
| RIPK4                         | 100                                                                           | 76       | 82     | 100    | 100    | 99       | 53      |
| RIPK5                         | 100                                                                           | 72       | 79     | 98     | 94     | 53       | 78      |
| ROCK1                         | 100                                                                           | 100      | 99     | 100    | 93     | 76       | 65      |
| ROCK2                         | 96                                                                            | 90       | 100    | 100    | 86     | 75       | 58      |
| ROS1                          | 88                                                                            | 87       | 54     | 65     | 88     | 26       | 96      |
| RPS6KA4(Kin.Dom.1-N-terminal) | 93                                                                            | 82       | 82     | 86     | 100    | 89       | 96      |
| RPS6KA4(Kin.Dom.2-C-terminal) | 100                                                                           | 100      | 63     | 88     | 92     | 92       | 91      |
| RPS6KA5(Kin.Dom.1-N-terminal) | 100                                                                           | 100      | 88     | 92     | 99     | 91       | 93      |

| ↓ DiscoverX Gene Symbol       | % remaining; 1 $\mu$ M for <b>9</b> and <b>1</b> ; other compounds 10 $\mu$ M |          |        |        |        |          |         |
|-------------------------------|-------------------------------------------------------------------------------|----------|--------|--------|--------|----------|---------|
| Compound→                     | <b>9</b>                                                                      | <b>1</b> | PQR514 | PQR309 | BYL719 | GDC-0980 | PKI-587 |
| RPS6KA5(Kin.Dom.2-C-terminal) | 100                                                                           | 100      | 88     | 95     | 80     | 83       | 91      |
| RSK1(Kin.Dom.1-N-terminal)    | 93                                                                            | 100      | 75     | 74     | 68     | 25       | 100     |
| RSK1(Kin.Dom.2-C-terminal)    | 96                                                                            | 100      | 88     | 86     | 85     | 92       | 91      |
| RSK2(Kin.Dom.1-N-terminal)    | 100                                                                           | 85       | 59     | 96     | 100    | 14       | 84      |
| RSK2(Kin.Dom.2-C-terminal)    | 82                                                                            | 63       | 84     | 96     | 100    | 100      | 100     |
| RSK3(Kin.Dom.1-N-terminal)    | 100                                                                           | 82       | 44     | 100    | 100    | 51       | 100     |
| RSK3(Kin.Dom.2-C-terminal)    | 90                                                                            | 93       | 95     | 100    | 90     | 88       | 95      |
| RSK4(Kin.Dom.1-N-terminal)    | 84                                                                            | 100      | 48     | 100    | 100    | 66       | 77      |
| RSK4(Kin.Dom.2-C-terminal)    | 84                                                                            | 95       | 94     | 100    | 94     | 99       | 99      |
| S6K1                          | 100                                                                           | 56       | 76     | 100    | 89     | 73       | 91      |
| SBK1                          | 100                                                                           | 100      | 60     | 100    | 98     | 75       | 89      |
| SGK                           | 91                                                                            | 85       | 77     | 93     | 100    | 100      | 100     |
| SgK110                        | 91                                                                            | 87       | 85     | 76     | 100    | 57       | 100     |
| SGK2                          | 100                                                                           | 86       | 84     | 96     | 100    | 100      | 100     |
| SGK3                          | 99                                                                            | 100      | 44     | 89     | 100    | 69       | 85      |
| SIK                           | 100                                                                           | 89       | 100    | 91     | 97     | 49       | 94      |
| SIK2                          | 91                                                                            | 96       | 97     | 97     | 100    | 98       | 70      |
| SLK                           | 82                                                                            | 80       | 24     | 96     | 95     | 14       | 86      |
| SNARK                         | 100                                                                           | 100      | 50     | 100    | 100    | 52       | 97      |
| SNRK                          | 87                                                                            | 99       | 81     | 100    | 92     | 89       | 85      |
| SRC                           | 94                                                                            | 91       | 57     | 77     | 92     | 1.6      | 100     |
| SRMS                          | 89                                                                            | 72       | 88     | 94     | 100    | 27       | 97      |
| SRPK1                         | 100                                                                           | 75       | 82     | 78     | 91     | 66       | 93      |
| SRPK2                         | 88                                                                            | 100      | 100    | 58     | 92     | 80       | 58      |
| SRPK3                         | 95                                                                            | 99       | 77     | 77     | 100    | 64       | 64      |
| STK16                         | 100                                                                           | 92       | 56     | 78     | 66     | 22       | 73      |
| STK33                         | 98                                                                            | 100      | 94     | 66     | 43     | 61       | 93      |
| STK35                         | 94                                                                            | 93       | 55     | 85     | 98     | 12       | 87      |
| STK36                         | 98                                                                            | 95       | 99     | 86     | 88     | 92       | 84      |
| STK39                         | 100                                                                           | 76       | 70     | 100    | 82     | 71       | 100     |
| SYK                           | 96                                                                            | 86       | 61     | 100    | 69     | 1.8      | 71      |
| TAK1                          | 98                                                                            | 100      | 91     | 100    | 81     | 35       | 91      |
| TAOK1                         | 93                                                                            | 80       | 60     | 86     | 96     | 100      | 2       |
| TAOK2                         | 90                                                                            | 72       | 92     | 100    | 88     | 75       | 0.6     |
| TAOK3                         | 100                                                                           | 77       | 70     | 87     | 100    | 100      | 12      |
| TBK1                          | 100                                                                           | 91       | 95     | 76     | 91     | 71       | 90      |
| TEC                           | 94                                                                            | 99       | 58     | 80     | 94     | 8.4      | 67      |
| TESK1                         | 100                                                                           | 100      | 72     | 83     | 93     | 86       | 87      |
| TGFBR1                        | 100                                                                           | 100      | 100    | 100    | 100    | 100      | 89      |
| TGFBR2                        | 100                                                                           | 88       | 69     | 90     | 78     | 89       | 100     |
| TIE1                          | 100                                                                           | 100      | 84     | 100    | 80     | 80       | 64      |
| TIE2                          | 100                                                                           | 97       | 99     | 100    | 93     | 86       | 100     |
| TLK1                          | 89                                                                            | 99       | 92     | 93     | 100    | 97       | 94      |

| ↓ DiscoverX Gene Symbol      | % remaining; 1 $\mu$ M for <b>9</b> and <b>1</b> ; other compounds 10 $\mu$ M |          |        |        |        |          |         |
|------------------------------|-------------------------------------------------------------------------------|----------|--------|--------|--------|----------|---------|
| Compound→                    | <b>9</b>                                                                      | <b>1</b> | PQR514 | PQR309 | BYL719 | GDC-0980 | PKI-587 |
| TLK2                         | 100                                                                           | 100      | 100    | 74     | 91     | 88       | 88      |
| TNIK                         | 92                                                                            | 87       | 82     | 75     | 81     | 27       | 73      |
| TNK1                         | 94                                                                            | 83       | 83     | 90     | 80     | 92       | 100     |
| TNK2                         | 98                                                                            | 100      | 85     | 75     | 71     | 81       | 87      |
| TNNI3K                       | 97                                                                            | 100      | 100    | 100    | 78     | 62       | 72      |
| TRKA                         | 59                                                                            | 81       | 78     | 88     | 91     | 32       | 88      |
| TRKB                         | 95                                                                            | 89       | 74     | 84     | 87     | 30       | 100     |
| TRKC                         | 36                                                                            | 86       | 87     | 92     | 100    | 51       | 96      |
| TRPM6                        | 65                                                                            | 71       | 59     | 85     | 72     | 32       | 66      |
| TSSK1B                       | 100                                                                           | 95       | 100    | 90     | 65     | 49       | 75      |
| TSSK3                        | 100                                                                           | 100      |        |        |        |          |         |
| TTK                          | 100                                                                           | 92       | 84     | 80     | 65     | 56       | 80      |
| TXK                          | 100                                                                           | 100      | 56     | 74     | 89     | 30       | 94      |
| TYK2(JH1domain-catalytic)    | 81                                                                            | 92       | 56     | 91     | 100    | 56       | 98      |
| TYK2(JH2domain-pseudokinase) | 65                                                                            | 56       | 15     | 100    | 97     | 0.05     | 92      |
| TYRO3                        | 100                                                                           | 100      | 81     | 68     | 66     | 56       | 95      |
| ULK1                         | 68                                                                            | 85       | 57     | 100    | 100    | 100      | 100     |
| ULK2                         | 100                                                                           | 96       | 72     | 91     | 100    | 100      | 100     |
| ULK3                         | 96                                                                            | 81       | 60     | 100    | 100    | 6.6      | 100     |
| VEGFR2                       | 94                                                                            | 81       | 41     | 100    | 100    | 30       | 100     |
| VPS34                        | 29                                                                            | 4.5      |        |        |        |          |         |
| VRK2                         | 71                                                                            | 93       | 64     | 100    | 100    | 97       | 97      |
| WEE1                         | 98                                                                            | 89       | 100    | 84     | 100    | 100      | 100     |
| WEE2                         | 97                                                                            | 100      | 82     | 100    | 96     | 88       | 100     |
| WNK1                         | 100                                                                           | 99       | 57     | 100    | 58     | 46       | 38      |
| WNK2                         | 69                                                                            | 92       |        |        |        |          |         |
| WNK3                         | 93                                                                            | 96       | 56     | 100    | 52     | 24       | 31      |
| WNK4                         | 46                                                                            | 92       |        |        |        |          |         |
| YANK1                        | 87                                                                            | 91       | 94     | 100    | 100    | 100      | 100     |
| YANK2                        | 100                                                                           | 93       | 90     | 76     | 100    | 79       | 89      |
| YANK3                        | 100                                                                           | 99       | 100    | 79     | 81     | 64       | 94      |
| YES                          | 84                                                                            | 97       | 80     | 76     | 83     | 15       | 100     |
| YSK1                         | 100                                                                           | 96       | 93     | 69     | 98     | 95       | 70      |
| YSK4                         | 63                                                                            | 42       | 41     | 100    | 83     | 1.8      | 6.7     |
| ZAK                          | 100                                                                           | 100      | 80     | 83     | 59     | 96       | 99      |
| ZAP70                        | 98                                                                            | 100      | 94     | 87     | 97     | 35       | 100     |

Data for **1** and BYL719 (Alpelisib) have been reported previously;<sup>1</sup> PQR514 data are from Ref. 2; PQR309, GDC0980 and PKI057 are from Ref. 3.

**Table S12. Selectivity profile based on KinomeScan data.**

| S-Score <sup>a</sup> | S35 (# of hits) | S10 (# of hits) | S1(# of hits) | # of Kinases | Drug [ $\mu$ M] |
|----------------------|-----------------|-----------------|---------------|--------------|-----------------|
| <b>9</b>             | 0.020 (8)       | 0.015 (6)       | 0.010 (4)     | 403          | 1               |
| <b>1</b>             | 0.025 (10)      | 0.012 (5)       | 0.007 (3)     | 403          | 1               |
| PQR514               | 0.041 (16)      | 0.025 (10)      | 0.02 (8)      | 395          | 10              |
| PQR309               | 0.025 (10)      | 0.018 (7)       | 0.005 (2)     | 395          | 10              |
| BYL719               | 0.053 (21)      | 0.035 (14)      | 0.008 (3)     | 395          | 10              |
| GDC0980              | 0.215 (85)      | 0.086 (34)      | 0.023 (9)     | 395          | 10              |
| PKI-587              | 0.046 (18)      | 0.028 (11)      | 0.018 (7)     | 395          | 10              |

<sup>a</sup>Selectivity Score (S-score) is a quantitative measure of compound selectivity, and is calculated with the formula:

$$S = \text{Number of hits} / \text{Number of tested kinases (excluding mutant variants)}.$$

S35, S10, S1 were calculated using % of control as a potency threshold (35, 10, 1%), e.g. S(35) = (number of non-mutant kinases with % of control <35)/(number of non-mutant kinases tested).

## Extended Materials and Methods

### Determination of Covalent PI3K $\alpha$ Modification by Mass Spectrometry

Determination of covalent PI3K $\alpha$  modification by mass spectrometry was carried out as described earlier:<sup>1</sup> 200 ng bovine serum albumin, (BSA, Thermo Scientific) and 200 ng PI3K $\alpha$  (Life Technologies) were diluted in 100  $\mu$ L reaction buffer (50 mM HEPES, 10 mM MgCl<sub>2</sub>, 1 mM EGTA, pH 7.5). Compound **7** and **7r** or DMSO were added to a final concentration of 1  $\mu$ M and incubated at 25 °C for 2 h with gentle agitation. Microcon Ym-10 ultrafiltration filters (Merck) were washed with 200  $\mu$ L urea buffer (8 M urea, 100 mM Tris, pH 8). All centrifugation steps were performed at 14000 g at room temperature for 30 min. Samples were applied to the Ym-10 filters followed by centrifugation. The retentates were dissolved in 250  $\mu$ L urea buffer supplemented with 5 mM DTT (Sigma) and incubated at 37 °C for 30 min. The filters were centrifuged and 250  $\mu$ L urea buffer supplemented with 10 mM iodoacetamide (Sigma) was added. Samples were incubated in the dark for 30 min and centrifuged again. The retentates were washed twice in 250  $\mu$ L 100 mM Tris (pH 8) followed by another centrifugation step. Finally, samples were diluted in 200  $\mu$ L of 100 mM Tris (pH 8) and digested with 100 ng Lys-C (Wako) for 1 h followed by 200 ng Trypsin (Promega) overnight at 37 °C. Peptides were harvested in clean Eppendorf tubes by centrifugation, addition of 200  $\mu$ L of 100 mM Tris pH 8 and subsequent centrifugation. Peptides were concentrated by SPE in UltraMicro spin columns (Nest Group) according to manufacturer instructions and dried in a Speedvac. Dried peptides were reconstituted in 8  $\mu$ L of 2% acetonitrile (ACN), 0.5% trifluoroacetic acid (TFA) and subjected to LC-MS/MS analysis.

LC-MS/MS data was acquired in data-dependent mode on a system consisting of a Proxeon Ultra easy LC and an Orbitrap Elite (Thermo Scientific). Peptides were separated on a PepMap100 column (C18, 0.075 x 150 mm, 2  $\mu$ m, 100A) with solvent A: 5% ACN, 0.1% formic acid (FA) in water and solvent B: 98% ACN, 0.1% FA. Gradient settings were: 0 – 60 min: 5%B-30%B at 300 nL/min. The Orbitrap Elite was run in data-dependent mode with parallel MS1/MS2 acquisition. Survey full scan MS1 spectra (from m/z 350 to 1600) were acquired in the Orbitrap with resolution R= 120000 at m/z 400. Up to 15 ions with charge state  $\geq +2$  were selected for fragmentation per cycle with a dynamic exclusion window of 30 s.

Peptides were identified using the Trans-Proteomic-Pipeline (TPP) version 5.1 with the search engine Myrimatch and the parameters: precursor tolerance: 10 ppm; fragment tolerance: 0.5 Da; dynamic modifications: iodoacetamide (C), oxidation (M); **7** (C) and **7r** (C); enzyme: Trypsin; missed cleavages: 2. Peptide probabilities were assigned with PeptideProphet and iProphet and the dataset was filtered with a peptide probability (iprobability) of 0.9. MS1 XIC traces of the C862 containing peptides with different covalent modifications were extracted using Skyline version 4.2.

The conversion rate of PI3K $\alpha$  C862 through the compounds was quantified using LC-SRM. 40 ng and 40 ng BSA were incubated with the compounds under study or DMSO at 1  $\mu$ M and digested as detailed above. All analyses were performed in triplicates. The resulting peptides were analyzed on a TSQ Vantage (Thermo Scientific) coupled to a nanoLC Ultra1D+ (Eksigent). Peptides were separated on a column (0.075 x 100 mm, C18 ProntoSIL 200 3  $\mu$ M, 200 A) packed into a PicoTip Emitter (New Objective). Peptides were separated along a linear gradient of B (98% ACN, 0.1% FA) in A (2% ACN, 0.1% FA), running from 2% – 35% B in 20 min. The TSQ was run in SRM mode, monitoring the NSHTIMQIQCK peptide with or without oxidized methionine as well as three, four and five peptides derived from p110 $\alpha$ , p85 $\alpha$  and BSA respectively. Samples were injected in randomized order. SRM data was processed in Skyline version 4.2 and exported to R version 3.5.1. NSHTIMQIQCK SRM intensity was normalized to the intensity of all other peptides.

#### **Determination of Distribution Coefficient (LogD, pH 7.4)**

Determination of distribution coefficient (LogD) was performed according to the Enamine's distribution coefficient SOP. Incubations were carried out in Eppendorf-type polypropylene microtubes in triplicates. Briefly, 5  $\mu$ L aliquot of 10 mM test compound stock (in 100% DMSO) was added into the previously mutually saturated mixture containing 500  $\mu$ L of phosphate-buffered saline (PBS, pH 7.4) and 500  $\mu$ L of octanol. The solution was allowed to mix in a rotator for 1 h at 30 rpm. Phase separation was assured by centrifugation for 2 min at 6000 rpm. The octanol phase was diluted 100-fold with 40% acetonitrile, and the aqueous phase (PBS buffer) was diluted 10-fold; for the compound CNX1351 the aqueous phase was analyzed without dilution. The samples (both phases) were analyzed using HPLC system coupled with tandem mass spectrometer. Mebendazole was used as a reference compound. Calculations of the partition ratios were carried out using the equation:

$$D = \frac{d_o * S_o}{d_p * S_p}, \quad \text{eq. 1}$$

where  $S_o$  is peak area of the analyte in octanol phase,  $S_p$  is peak area of the analyte in PBS buffer,  $d_o$  is dilution coefficient for octanol phase, and  $d_p$  is dilution coefficient for aqueous phase.

#### **Analysis of Aqueous Solubility (Kinetic Solubility)**

Kinetic solubility assay was performed according to the Enamine's aqueous solubility SOP. Briefly, using a 20 mM compound stock solution (in 100% DMSO) dilutions were prepared to a theoretical concentration of 400  $\mu$ M in duplicates in PBS pH 7.4 with 2% final DMSO. The experimental compound dilutions in PBS were further allowed to equilibrate at 25  $^{\circ}$ C on a thermostatic shaker for 2 h and then filtered through HTS filter plates using a vacuum manifold.



The filtrates of test compounds were diluted 2-fold with acetonitrile with 2% DMSO before measuring. In parallel, compound dilutions in 50% acetonitrile/PBS were prepared to theoretical concentrations of 0  $\mu$ M (blank), 10  $\mu$ M, 25  $\mu$ M, 50  $\mu$ M, 100  $\mu$ M, and 200  $\mu$ M with 2% final DMSO to generate calibration curves. Ondansetron was used as reference compound to control proper assay performance. 200  $\mu$ L of each sample was transferred to 96-well plate and measured in 200-550 nm range with 5 nm step. Absorbance wavelengths for calculations were selected for each compound manually based on absorbance maximums (the minimum and maximum concentration points within a 0-3 OD range in absolute absorbance units). The effective range of this assay is within approximately 2-400  $\mu$ M and the compounds returning values close to the upper limit of the range may have higher actual solubility (for example 5'-deoxy-5-fluorouridine).

### **Intrinsic Warhead Reactivity ( $k_{\text{chem}}$ ) assay**

The assay was carried out as outlined earlier<sup>1</sup> with minor modifications: compound stock solutions of 2 mM in pure DMSO were prepared. Subsequently, the following solutions were mixed in a HPLC vial (volume = 1.5 mL): (i) 750  $\mu$ L of 2 mM test compound stock solution; (ii) 375  $\mu$ L pure DMSO and (iii) 285  $\mu$ L phosphate-buffered saline (PBS). The solutions were maintained at 37°C and analyzed using an Ultimate 3000SD System from ThermoFisher with LPG-3400SD pump system, ACC-3000 autosampler and column oven, and DAD- 3000 diode array detector. An Acclaim-120 C18 reversed-phase column from ThermoFisher was used as stationary phase.

Gradient elution (5:95 for 0.2 min, 5:95  $\rightarrow$  100:0 over 10 min, 100:0 for 3 min) of the mobile phase consisting of ACN / MeOH:H<sub>2</sub>O (10:90) was used at a flow rate of 0.5 mL / min at 40°C. Following the first injection (time zero), 90  $\mu$ L of 10 M  $\beta$ -mercaptoethanol ( $\beta$ ME) in PBS were added, to yield a final concentration of 600 mM  $\beta$ ME. The loss of inhibitor and the formation of inhibitor +  $\beta$ ME adduct was monitored every 20 min for the first 3 h and every 1 h thereafter for up to 8 h. The inhibitor +  $\beta$ ME adduct was identified by MALDI-ToF mass spectra obtained on a Voyager-DeTM Pro measured in m/z (see supplementary data set). The percent of inhibitor +  $\beta$ ME adduct in each sample was determined by measuring the area under the curve in HPLC chromatograms. Moles of inhibitors were plotted versus time (in seconds) using GraphPad Prism to determine  $k'$  for the reaction (unit of  $k' = \text{s}^{-1}$ ). Dividing  $k'$  for the concentration of  $\beta$ ME used in the assay, pseudo-first order reactions were converted into second-order reaction and  $k_{\text{chem}}$  (in units of  $\text{M}^{-1}\cdot\text{s}^{-1}$ ) was determined. Experiments were performed in triplicates and results are given in means  $\pm$  SD.

## Determination of Kinetic Constants of Inhibitor/PI3K Interaction

The inhibitory constant ( $K_i$ ) and the covalent reaction rate  $k_{\text{inact}}$  of compounds and p110 $\alpha$  were determined using LanthaScreen Technology (Life Technologies) as described earlier<sup>1</sup> with some modifications. An *N*-terminally His<sub>6</sub>-tagged p110 $\alpha$  recombinant protein (5 nM, PV4789) was combined with a biotinylated anti-His<sub>6</sub>-tag antibody (2 nM, PV6089), an Europium-labeled Streptavidin complex (2 nM, PV5899) and an AlexaFluor647-labelled kinase Tracer (Tracer 314, 20 nM, PV6087,  $K_D$  of 2.26 nM for p110 $\alpha$ ) in TR-FRET assay buffer (50 mM N-(2-hydroxyethyl)piperazine-*N'*-ethanesulfonic acid (HEPES) pH 7.5, 10 mM MgCl<sub>2</sub>, 1 mM ethylene glycol-bis( $\beta$ -aminoethyl ether)-*N,N,N',N'*-tetraacetic acid (EGTA), and 0.01% (v/v) Brij-35). The prepared kinase-antibody-tracer (KAT) complex was dispensed into a 384-well plate (14  $\mu$ L per well). The plate was then centrifuged (700 g for 5 min) and incubated in the dark at room temperature for 45 min. Subsequently, compounds were diluted in TR-FRET assay buffer and then dispensed to the KAT solution (in triplicate) at a final concentration range between 10  $\mu$ M and 0.2 nM using an I.DOT One dispenser (Dispensix). Immediately after addition of the compounds, TR-FRET was measured for 90 min using a Synergy Neo2 plate reader. (BioTek instruments; excitation at 330/80 nm using a Xenon flash lamp (except for **9r**, there, a TRF laser at 337 nM was used); Emission filters: 665/8 nm and 620/10 nm; 100  $\mu$ s delay, 200  $\mu$ s data collection; 37 °C; dichroic mirror 400 nm). The emission ratio of 665/620 nm was normalized and subsequently, the data was fitted to a model using KinTek Global Kinetic Explorer modelling software (Version 10.0.200717). The reaction model depicted below was used to calculate  $K_i$  and  $k_{\text{inact}}$  values. T is the Tracer, E~T is the reversible enzyme-tracer complex, I is the inhibitor, E~I is the reversible enzyme-inhibitor complex and EI is the covalent enzyme-inhibitor complex.

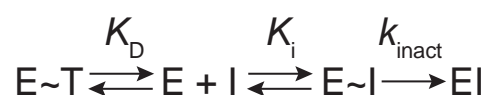

## Cellular, covalent target engagement using NanoBRET (Inhibitor displacement)

NanoBRET assays were carried out as described before<sup>1</sup> with some modifications. Expression vectors encoding a Nanoluciferase (NanoLuc) *N*-terminally fused to various class IA PI3K catalytic subunit isoforms and one mutant were purchased from Promega (PI3K $\alpha$  wild type, #NV3901; PI3K $\alpha$  C862S; custom vector; PI3K $\beta$ , #NV4011; and PI3K $\delta$ , #NV4021). For transient transfections, 2x10<sup>6</sup> HEK293 cells were co-transfected with a total of 10  $\mu$ g of plasmid DNA for NanoLuc-PI3K and the regulatory subunit p85 $\alpha$  (Promega, #NV4031) at a mass ratio of 1:10 (catalytic subunit:regulatory subunit) using jetPEI transfection reagent (Polyplus transfection, #101B-010N) according to the manufacturers protocol, followed by incubation for

20 h (37 °C, 5% CO<sub>2</sub>). Cells were then reseeded into white opaque, flat-bottom 96-well plates (Falcon, #353296) at a density of 2 x 10<sup>5</sup> cells per mL in Opti-MEM without phenol red (Gibco, #11058021) and incubated for 4 h (37 °C, 5% CO<sub>2</sub>). Inhibitors were diluted in PBS (pH 7.4) and dispensed to a final concentration of 3 μM using an I.DOT dispenser (Dispindex). Cells were then incubated for 2 h (37 °C, 5% CO<sub>2</sub>). After incubation, medium containing inhibitors was gently aspirated and cells were washed twice with inhibitor-free Opti-MEM. The energy transfer probe Tracer K-3 (200 nM, Promega, #N2602), NanoGlo substrate (Promega, #N157C) together with Extracellular NanoLuc Inhibitor (10 μM, Promega, #N235B) were dispensed using an I.DOT dispenser (Dispindex). Immediately after dispensing, filtered luminescence was measured sequentially on a Berthold Mithras<sup>2</sup> LB 943 Plate Reader luminometer at 25 °C equipped with 460 nm BP filter (donor) and 600 nm LP filter (acceptor), using 0.5 s integration time.

### **Drug-Target Engagement Kinetics in HEK293 Cells; NanoBRET diffusion assay**

For kinetic measurement of drug-target engagement in living cells, HEK293 cells were transiently co-transfected with vectors expressing *N*-terminal NanoLuc fused to p110α wildtype (Promega #NV3901) and regulatory subunit p85α (Promega #NV4031) as described in the previous section. Tracer K-3 (200 nM), NanoBRET NanoGlo Substrate and Extracellular NanoLuc Inhibitor (10 μM) were dispensed using an I.DOT One dispenser (Dispindex) with subsequent incubation for 20 min (37 °C, 5% CO<sub>2</sub>). Immediately after addition of the test compounds at the concentration range between 5000 nM and 78 nM (2-fold dilution steps) using an I.DOT One dispenser (Dispindex), BRET measurements were performed at 25 °C for 4 h on a Berthold Mithras<sup>2</sup> LB 943 Plate Reader luminometer equipped with 460 nm BP filter (donor) and 600 nm LP filter (acceptor), using 0.5 s integration time.

### **Computational Compound Conformation Searches**

Computational conformational searches were carried out via MacroModel (version 10.0) in Maestro Schrödinger version 13.3.121 (2022-3 release). The structures of **1**, **7**, and **9** were prepared via LigPrep software, and ionized according to Epik at pH 7. The conformational search was set up via MacroModel software, for both water and octanol as explicit solvents. All simulations for each molecule-solvent pair were performed by searching for viable conformations within an energy window of 21.0 kJ/mol (i.e., 5.02 kcal/mol) using the OPLS4 force field. All simulations were submitted with the default parameters for a maximum number of 500 conformers – when accessible within the selected energy window – to be generated for each structure-solvent combination, using the default mixed torsional/low-mode sampling method for MacroModel conformational search. Redundant conformers were eliminated using a maximum atom deviation cutoff of 0.5 Å.

For each structure-solvent combination, all conformers were screened for conformational similarity and intramolecular hydrogen bonds. For each structure-solvent pair, the representative conformers xyz coordinates were exported to Pymol software. 3D PSA values were computed using a Pymol script.<sup>4</sup> For the representative conformers in octanol intramolecular hydrogen bonds (IMHBs) were detected (see Figure S6).

### **KinTek Modelling to Estimate On/Off Target Covalent Modification**

On-target and off-target covalent binding for each inhibitor were modelled using KinTek Global Kinetic Explorer modelling software.<sup>5,6</sup> Numerical integration to the enzymatic reaction model was carried out as given below:

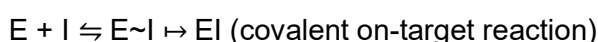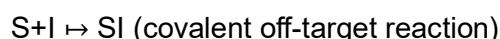

E denotes enzyme concentration; I denotes inhibitor concentration; E~I is the reversible inhibitor-enzyme complex, whose equilibrium is defined by experimentally determined  $K_i$ ; and EI is the covalent enzyme-inhibitor complex whose formation rate is defined by experimentally determined  $k_{inact}$ . S denotes thiol concentration and SI denotes the covalent thiol-inhibitor adduct which forms with an experimentally determined rate,  $k_{chem}$ .

The reaction parameters [ $K_i$  and  $k_{inact}$ ] and the intrinsic warhead reactivity [ $k_{chem}$ ] were determined experimentally (see “Determination of Inhibitor Dissociation and Kinetic Constants” and “Determination of Intrinsic Warhead Reactivity ( $k_{chem}$ ) Using  $\beta$ -Mercaptoethanol”). The on-target reaction with 10 nM cellular PI3K $\alpha$  enzyme and off-target reaction with 7 mM thiol<sup>7</sup> were modelled for the indicated inhibitors at a concentration of 100 nM.

### **Cellular Diffusion Coefficients**

Using the results obtained by drug-target engagement tracer displacement in HEK293 cells (see section “Measurement of Drug-Target Engagement Kinetics in Living HEK293 Cells Using NanoBRET (Tracer Displacement)”), modeling to calculate kinetic parameters was carried out through global fitting for numerical integration using KinTek Global Kinetic Explorer modelling software.<<Johnson, 2009 19897109; Johnson, 2009 19154726>> Specifically, the recorded NanoBRET assay tracer displacement data were fitted with the KinTek Global Kinetic Explorer modelling software to a process/enzymatic reaction model as given below:

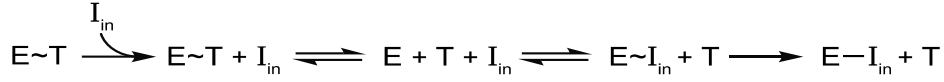

where  $I_{in}$  is the intracellular inhibitor concentration.  $E \sim T$  is the reversible enzyme (E) ~ tracer (T) complex,  $E \sim I_{in}$  is the initial reversible inhibitor-enzyme complex, and  $E - I$  is the covalent enzyme-inhibitor complex.

The traversing of an inhibitor across the plasma membrane ( $I_{out} \rightleftharpoons I_{in}$ ) can be formulated as a reversible process ( $Y \rightleftharpoons Z$ ). As the extracellular compartment volume ( $V_{ex}$ ) is much larger than the intracellular volume ( $V_{in}$ ), the extracellular concentration  $I_{out}$  can be assumed to remain constant ( $I_{out} = I_0$ ). This process can then be described by the following differential equation (eq. 2).

$$\frac{dI_{in}}{dt} = [I_0] * k_1 - [I_{in}] * k_{-1} \quad \text{eq. 2}$$

Small molecule inhibitors are assumed to traverse the plasma membrane by simple passive diffusion, therefore  $k_1 = k_{-1}$  and equation eq. 2 yields:

$$\frac{dI_{in}}{dt} = (I_0 - [I_{in}]) * k_1 \quad \text{eq.3}$$

Based on Fick's first law, the diffusion of a small molecule across a membrane can be described by the following equation (eq. 4):<sup>8</sup>

$$J' = -\frac{dI}{dt} = D * A * \frac{dI}{dx} \quad \text{eq. 4}$$

where  $J'$  or  $-\frac{dI}{dt}$  is the mean molecular diffusion rate of the inhibitor in [ $cm^3/s$ ],  $D$  the diffusion coefficient in [ $cm^2/s$ ],  $A$  is the surface area of the cell plasma membrane in [ $cm^2$ ], and  $\frac{dI}{dx}$  is the concentration gradient of the inhibitor over the plasma membrane in [ $mol/cm^4$ ]. The gradient  $\frac{dI}{dx}$  can be approximated by a stepwise gradient ( $[I_0] - [I_{in}])/\Delta x$ , where  $\Delta x$  is the thickness of the cell plasma membrane in [ $cm$ ], yielding:

$$\frac{dI_{in}}{dt} = D * A * \frac{[I_0] - [I_{in}]}{\Delta x} = \frac{D * A}{\Delta x} * ([I_0] - [I_{in}]) \quad \text{eq. 5}$$

setting eq. 3 equal to eq. 5 one yields eq. 6

$$\frac{dI_{in}}{dt} = \frac{D \cdot A}{\Delta x} * ([I_0] - [I_{in}]) = (I_0 - [I_{in}]) * k_1 \quad \text{eq. 6}$$

which defines  $k_1$  as

$$k_1 = \frac{D \cdot A}{\Delta x} \quad \text{eq. 7}$$

where  $k_1$  is the diffusion kinetic rate constant [ $cm^3/s$ ], determined by fitting the experimental NanoBRET intensity curves (see Fig. 3) to the process/enzymatic reaction model using KinTek Global Kinetic Explorer modelling software, with restriction that  $I_{out} = I_0$  during the diffusion process.

With  $k_1$  obtained by modelling and eq. 7, the diffusion coefficient  $D$  in [ $cm^2/s$ ] could be calculated with  $A$  and  $\Delta x$ :

$$D = \frac{k_1 \cdot \Delta x}{A} \quad \text{eq. 8}$$

although values for the thickness of the plasma membrane ( $\Delta x = 8 \text{ nm}^9$ ), and the surface area of HEK293 cells<sup>10</sup> ( $A$ ) have been reported, the NanoBRET assay is influenced by transfection efficiency and fusion protein expression in individual cells. We therefore present a standardized diffusion coefficient ( $D_{rel \text{ of } ac}$ ) for the assessed compounds ( $ac$ ) ( $D_{of \text{ } ac}$ ). This relative value is expressed in relation to the diffusion coefficient of BYL719 ( $D_{of \text{ } BYL719}$ ) where

$$D_{rel \text{ of } ac} = \frac{D_{of \text{ } ac}}{D_{of \text{ } BYL719}} = \frac{k_1 \text{ of } ac}{k_1 \text{ of } BYL719} \quad \text{eq. 9}$$

The available area ( $A$ ) for an inhibitor to diffuse into per well was approximated with the following considerations. The surface area of one HEK293 cell for an inhibitor to diffuse into can be approximated using the following formula:<sup>10</sup>

$$A \approx \frac{4\pi \left( \frac{(ab)^{1.6}(ac)^{1.6}(bc)^{1.6}}{3} \right)^{1/1.6}}{2} \quad \text{eq. 10}$$

The values for  $a = b = 10 \text{ }\mu\text{m}$ ,  $c = 5 \text{ }\mu\text{m}$  have been published earlier,<sup>10</sup> yielding a total available surface area of a model HEK293 cell of  $434 \text{ }\mu\text{m}^2$ . The total available surface area was calculated by multiplying the surface area of one HEK293 cell by the number of transfected cells per well, which yields a total surface area for the inhibitor to diffuse into of  $0.0651 \text{ cm}^2$ .

### Cell Line Maintenance

HEK293, T47D, MCF7, SKOV3, A2058, and PC3 cell lines were obtained from the ATCC as frozen stocks. HCC1954 and MDA-MB-453 were a gift from Prof. Mohamed Bentires-Alj

(University of Basel). Cell lines were cultured according to ATCC recommendations. DMEM (Sigma, #D5671) was used to culture HEK293, SKOV3, and MDA-MB-453 cell lines. Low glucose DMEM (Sigma, #D6046) was used to culture T47D and MCF7 cell lines. RPMI-1641 (Sigma, #R0883) was used to culture A2058, PC3 and HCC1954 cell lines. Complete growth media were obtained by supplementing with 10% fetal calf serum (FCS, Sigma, #F7524, Batch BCBV4855), 2 mM L-glutamine (Sigma, #G7513), 100 U/mL penicillin and 100 µg/mL streptomycin (Gibco, #15140122), (medium with all supplements dubbed below as complete growth medium) in humidified incubators maintained at 37 °C and 5% CO<sub>2</sub>. Cell lines were maintained in culture ~15 passages from the point of cryopreservation before being replaced with new frozen aliquots. Cell lines in culture were routinely screened for Mycoplasma infection using the MycoAlert Detection Kit (Lonza #LT07-418).

### **Cellular PKB/Akt and S6 Ribosomal Protein Phosphorylation**

Phosphorylation of PKB/Akt and ribosomal protein S6 were measured using in-cell western (ICW) assays as described earlier,<sup>1</sup> with modifications. Cells were seeded into 96-well CellCarrier black plates with optically clear bottom (PerkinElmer) in complete growth medium and allowed to adhere overnight (37 °C, 5% CO<sub>2</sub>). Inhibitor stock solutions prepared in DMSO (2 mM) were added using an I.DOT One dispenser (Dispensix) to generate a concentration range in 0.05% DMSO. Cells were incubated for 2 h (37 °C, 5% CO<sub>2</sub>) unless otherwise stated, fixed with 4% paraformaldehyde (PFA) in PBS for 30 min at room temperature, permeabilized with 1% BSA, 0.1% Triton X-100 in PBS for 30 min at room temperature, blocked with 5% goat serum, 1% BSA, 0.1% Triton X-100 in PBS for 30 min at room temperature, and stained with rabbit monoclonal anti-phospho-Ser473 PKB/Akt (Cell Signaling Technology, #4058, 1:500) or anti-phospho-Ser235/236 S6 ribosomal protein (Cell Signaling Technology, #4856, 1:500) and mouse monoclonal anti- $\alpha$ -tubulin (Sigma, #T9026, 1:2000) antibodies overnight at 4 °C. Primary antibodies were removed and cells were washed 3 times with PBS before secondary antibodies (IRDye680-conjugated goat anti-mouse [LICOR, #926-68070, 1:500] and IRDye800-conjugated goat anti-rabbit [LICOR, #926-32211, 1:500]) were added and incubated for 90 min with shaking in the dark at room temperature. After removal of secondary antibodies and 3 washes with PBS, fluorescence was recorded on an Odyssey CLx infrared imaging scanner (LICOR) set on "In Cell Western" mode, offset 4.0 µm, automatic exposure. Background signal (wells without primary antibody) was first subtracted from test wells in both channels. Phosphorylated protein signal was corrected for cellular protein as determined by  $\alpha$ -tubulin signal. Corrected values were normalized to DMSO, representing 100% signal. The calculated percentages of remaining phospho-PKB/S6 signals were plotted as a function of inhibitor concentration (log scale) and dose-response curves were fit in GraphPad Prism (v9.3.1) using the formula:

$$Y = \frac{100}{1+10^{(\text{Log}IC_{50}-\text{Log}X)*\text{HillSlope}}} \quad \text{eq. 11}$$

where X is the inhibitor concentration. IC<sub>50</sub> values of inhibitors were determined by interpolating the concentration X where Y = 50%.

### **FOXO1 KTR Translocation Assay**

Cell lines (A2058, SKOV3, T47D) stably expressing a FOXO1 Clover fusion protein were prepared using lentiviral transduction with the pLenti-FoxO1-Clover<sup>11</sup> plasmid (www.addgene.org) and 3<sup>rd</sup> generation lentiviral packaging plasmids according to the laboratory protocol for lentivirus production of the Broad Institute The RNAi Consortium (TRC). As a transfection reagent, jetPEI was used as an alternative to FuGENE. Cells were then selected by incubation with puromycin and sorted by fluorescence intensity using a FACS BD FACSAria IIIu cell sorter.

Stably transfected cells were seeded in 95 µL complete DMEM into 96-well plates (Cell Carrier, Perkin Elmer) the day before inhibitor treatment. To generate inhibitor dose-response curves, cells were exposed to inhibitors for 1 h unless otherwise stated, and fixed with 4% PFA for 30 min at room temperature. Cells were permeabilized and stained with Hoechst33324 (10 µg/mL) diluted in 1% BSA, 0.1% Triton-X in PBS for 30 min at room temperature in the dark. Fluorescent microscopy images were acquired on an Operetta high content analysis system (Perkin Elmer). At least 35 fields of view/well were acquired as wide field images (20xWD objective, N.A. 0.45). Nuclei (and nuclear DNA content) were imaged using the Hoechst filter set and FOXO1 localization was imaged using the YFP filter set. Images were batch analyzed using Cell Profiler version 4.2.4<sup>12</sup> (Broad Institute, www.cellprofiler.org). Nuclei were identified using primary object identification using the nuclear stain fluorescence and cells were identified by extending the nuclear segmentation to create a ring around the nucleus a specified number of pixels based on the FOXO1 Clover reporter fluorescence (secondary object). Subsequently, the nuclear region was subtracted from the cellular region to give a cytosolic ring ("cytoring"). The average ratio of the median fluorescence intensity of the cytoring/nucleus was calculated for each inhibitor concentration or DMSO control well and used to quantify FOXO1 localization (i.e. low values indicate nuclear translocation while high values indicate cytosol translocation). Data were expressed as percentage of DMSO control (representing 100% response), with the lowest cytoring/nuclear ratio subtracted as background (representing 0% response after subtraction). Dose-response curves were fit in GraphPad Prism version 9.3.1 using the formula:



$$Y = \text{Bottom} + \frac{(\text{Top}-\text{Bottom})}{1+10^{(\text{LogIC}_{50}-\text{LogX})\cdot\text{HillSlope}}} \quad \text{eq. 12}$$

where X is inhibitor concentration, Top = 100 and Bottom must be a value between 0 and 100. IC<sub>50</sub> values of inhibitors were determined by interpolating the concentration X where Y = 50%. Live cell imaging studies were performed in phenol red-free medium with 2% FCS and nuclei were stained with SiR Hoechst (spirochrome.com) for 1 h prior to imaging using a Leica DMI8 microscope (Leica) with a stage top incubator maintained at 37 °C, and in 95% air, 5% CO<sub>2</sub>. Cells were exposed to vehicle or inhibitors (3 μM) for 2 h followed by washout of inhibitors (media was removed and replaced twice) and imaging was continued for a further 10 h. Cells were imaged every min until 1 h following washout and at later time points every 30 min using a 20x HC Plan-Apo objective (N.A. 0.8), and a GFP filter cube (excitation band, 470/40 nm; emission band, 525/50 nm) and a Cy5 filter cube (excitation band, 620/60 nm; emission band, 700/72 nm). Image analysis was performed as described above.

### Resazurin Assay to Measure Cellular Viability

Cells were seeded into 96-well CellCarrier black plates (PerkinElmer) in complete growth medium and allowed to adhere overnight (37 °C, 5% CO<sub>2</sub>). Inhibitors were serially diluted in medium and added to the wells (max. 0.25% DMSO). Relative live cells numbers were measured using the resazurin assay at the beginning (t = 0 h) and at the end of the incubation period (t = 72 h for generation of concentration-response curves and t = 96 h for intermittent exposure experiments). A 11X resazurin solution (0.3 mg/ml diluted in Dulbecco's PBS, filter sterilized) was added to the wells containing cells alongside at least one well per plate containing medium only (background signal) and incubated for 4 h at 37 °C, 5% CO<sub>2</sub>. Fluorescence was recorded on a Synergy 4 plate reader (BioTek) using a 565/590 nm excitation/emission filter set (top read, 4 mm offset). Background fluorescence values were subtracted from raw test values and growth rates at concentration c (GR<sub>(c)</sub>) were calculated using the equation:

$$\text{GR}_{(c)} = 2^{\frac{\log_2 \frac{x_{(c)}}{x_{(0)}}}{\log_2 \frac{x_{(\text{DMSO})}}{x_{(0)}}}} - 1 \quad \text{eq. 13}$$

where x<sub>(0)</sub> represents the initial fluorescence read, x<sub>(c)</sub> represents the final fluorescence read at inhibitor concentration c, and x<sub>(DMSO)</sub> represents the final fluorescence read in the vehicle control.

To generate dose-response curves, the calculated GR values were fitted in GraphPad Prism (version 9.3.1) using the equation:

$$Y = \text{Bottom} + \frac{(\text{Top}-\text{Bottom})}{1+10^{(\text{LogIC}_{50}-\text{LogX})\cdot\text{HillSlope}}} \quad \text{eq. 14}$$

where X is the inhibitor concentration, Top = 1, and Bottom  $\geq$  -1. Finally, GR<sub>50</sub> values were determined by interpolating the concentration X<sup>13</sup> where Y = 0.5.

### **Cell Lysis**

Cells seeded in 6-well plates in complete growth medium were allowed to adhere overnight at 37 °C and 5% CO<sub>2</sub>. For determination of p110 $\alpha$  levels, inhibitors (1  $\mu$ M) were added to the medium and incubated for 48 h. For experiments using serum-starved cells, plating medium was removed and replaced with medium containing no FCS for 24 h. Compound **9** and TGX221 were used at a final concentration of 1  $\mu$ M, and receptor ligands were added at the following final concentrations: 10 ng/mL epidermal growth factor (EGF, Sigma #E9644), 10  $\mu$ g/mL insulin (Sigma #I9278), 50 ng/mL CXCL12 (Peprotech #250-20A). After incubation at 37 °C and 5% CO<sub>2</sub> for the indicated times, medium was removed and cells were washed twice with cold PBS. Adherent cells were detached and lysed using 1x cell lysis buffer (Cell Signaling Technology #9803) supplemented immediately before use with either Halt™ Protease and Phosphatase Inhibitor Single-Use Cocktail (100X; Thermo Scientific, #78442) or cComplete™ EDTA-free protease inhibitor cocktail (Roche), PhosSTOP™ phosphatase inhibitor cocktail (Roche) and 1 mM PMSF, for 30 min on ice. Cell extracts were cleared in a cooled centrifuge (4 °C, 10 min, 16'000 g) and supernatants were transferred to cooled Eppendorf tubes and used for SDS-PAGE immediately or stored frozen at -20 °C until further processing.

### **SDS-PAGE**

Total protein content of cell lysates was determined using a Pierce™ BCA protein assay kit (Thermo Scientific). Equal amounts of protein were denatured in SDS-PAGE sample buffer and heated at 95 °C for 10 min. Denatured protein samples were subjected to SDS-PAGE and transferred to pre-cut 0.2  $\mu$ m nitrocellulose membranes using the Trans-Blot Turbo Transfer System (Bio-Rad).

### **Western Blotting**

Membranes were blocked in TBS buffer containing 0.1% Tween-20 (TBST) with either 1% BSA or 5% (w/v) non-fat dry milk powder (Cell Signaling Technologies, #9999). Primary antibodies against pSer473-PKB/Akt (#4058, 1:1000), pThr308-PKB/Akt (#9275, 1:1000), pan-PKB/Akt (#2920, 1:1000), p44/42 MAPK (Erk1/2, 1:1000) (#4695) and pThr202/Tyr204-p44/42 MAPK (Erk1/2, 1:1000) (#4370) were from Cell Signaling Technology and primary antibody against  $\beta$ -actin (A5441, 1:10000) was from Sigma. Primary antibody against p110 $\alpha$  U3A (diluted 1:2000) has been described previously.<sup>14</sup> Membranes were incubated with primary antibodies overnight followed by extensive washing using TBST and subsequent probing using HRP-conjugated secondary antibodies (goat anti-mouse IgG peroxidase

conjugate, Sigma #A4416, 1:5000 and goat anti-rabbit IgG peroxidase conjugate, Sigma #A6154, 1:5000). Chemiluminescent signals were visualized using Immobilon western HRP substrate (Millipore) on a Fusion FX (Vilber Lourmat) imaging system. Levels of phosphorylated and total protein signals were quantified using ImageJ. Phospho-protein levels in each sample were normalized to total protein signals.

### **Cell Cycle Distribution Analysis**

Cells seeded in 6-well plates in complete growth medium were allowed to adhere overnight at 37 °C and 5% CO<sub>2</sub>. Inhibitors or DMSO control were added at the indicated final concentrations for 48 h. Subsequently, cells were detached, fixed in 70% cold ethanol and stained with 1 µg/mL DAPI diluted in PBS with 0.1% Triton X-100 for 30 min in the dark. Cell cycle profiles were acquired by flow cytometry (CytoFlex LX, Beckman Coulter) and analyzed with FlowJo (Treestar) software.

### **Kinome Profiling**

Compound binding affinity and selectivity were determined as previously described<sup>1</sup> using the KINOMEscan™ scanMAX platform of DiscoverX. Experiments were performed at DiscoverX, San Diego using its automated and standardized *in vitro* assay and data analysis and TreeSpot™ visualization tools.

## Chemical Structures Final Compounds

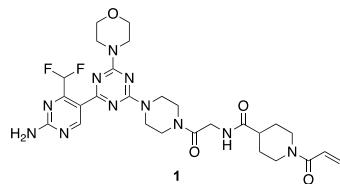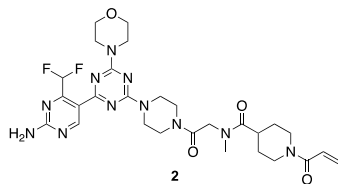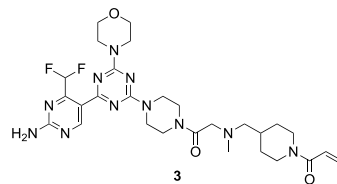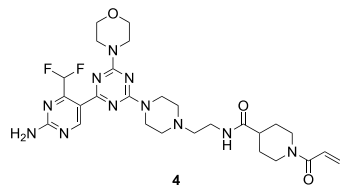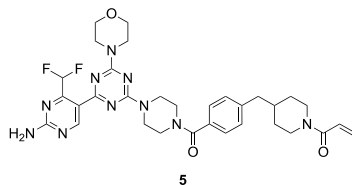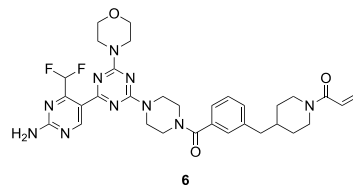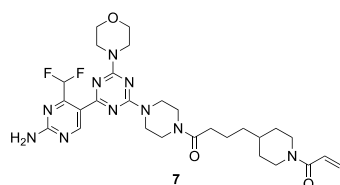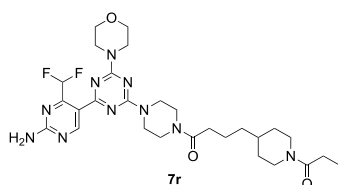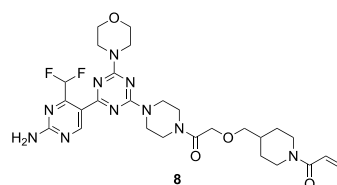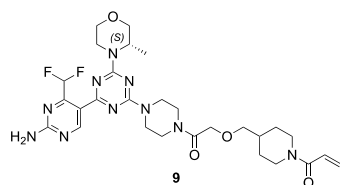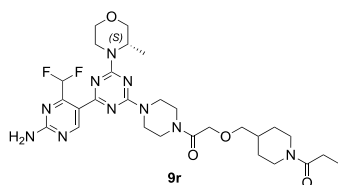

## Reference Compounds

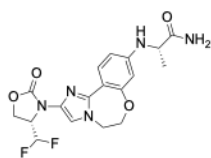

GDC0077

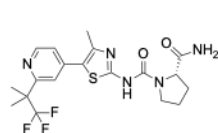

BYL719

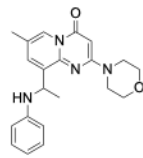

TGX221

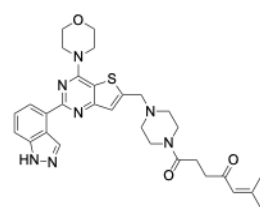

CNX1351

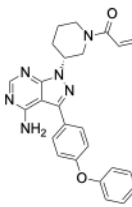

Ibrutinib



## Synthesis and Characterization

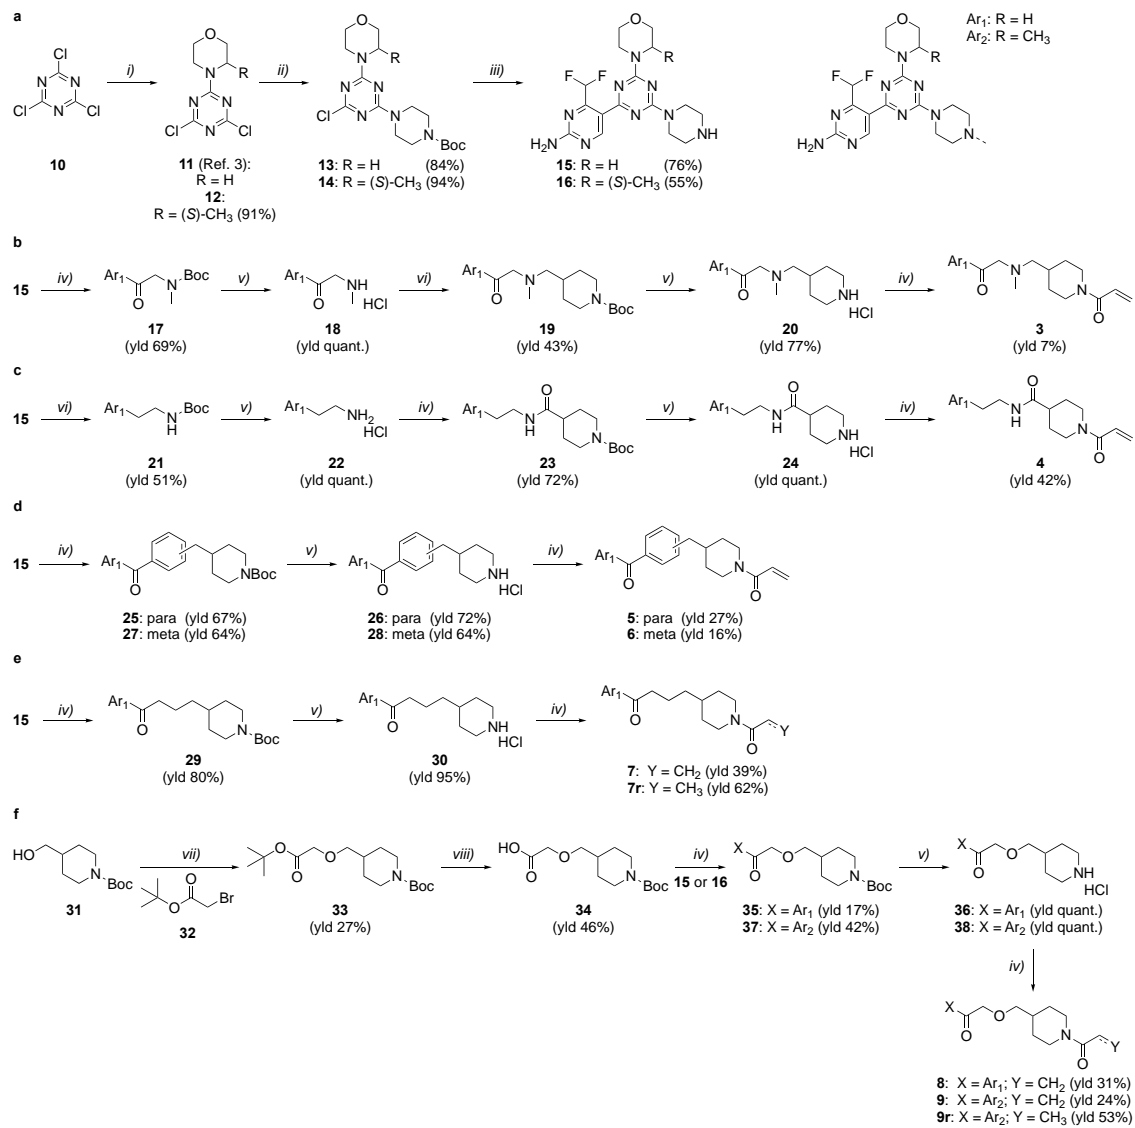

## General Information, Chemistry

Reagents were purchased at the highest commercial quality from Acros Organics, Sigma-Aldrich, Apollo Scientific or Fluorochem and used without further purification. Solvents were purchased from Acros Organics in AcroSeal<sup>®</sup> bottles over molecular sieves. Grignard reactions, cross-coupling reactions and peptide-coupling reactions were carried out under nitrogen atmosphere in anhydrous solvents, and glassware was oven dried prior to use. Thin layer chromatography (TLC) plates were purchased from Merck KGaA (Polygram SIL / UV254, 0.2 mm silica with fluorescence indicator) and UV light (254 nm) was used to visualize the compounds. Flash chromatography was performed with Isco CombiFlash Companion systems using prepacked silica gel columns (40 - 60  $\mu$ m particle size RediSep). <sup>1</sup>H, <sup>19</sup>F and <sup>13</sup>C NMR spectra were recorded on a Bruker Avance 400 spectrometer. NMR spectra were obtained in deuterated solvents, namely CDCl<sub>3</sub> or (CD<sub>3</sub>)<sub>2</sub>SO. The chemical shift ( $\delta$  values) are reported in ppm and corrected to the signal of the deuterated solvents (7.26 ppm (<sup>1</sup>H NMR) and 77.16 ppm (<sup>13</sup>C NMR) for CDCl<sub>3</sub>; and 2.50 ppm (<sup>1</sup>H NMR) and 39.52 ppm (<sup>13</sup>C NMR) for (CD<sub>3</sub>)<sub>2</sub>SO. <sup>19</sup>F NMR spectra are calibrated relative to CFCl<sub>3</sub> ( $\delta$  = 0 ppm) as external standard. When peak multiplicities are reported, the following abbreviations are used: s (singlet), d (doublet), dd (doublet of doublets), t (triplet), td (triplet of doublets), q (quartet), doublet of quartets (dq), m (multiplet), br (broadened signal). Coupling constants are reported in Hertz (Hz). High resolution mass spectra (HRMS) were recorded on a Thermo Fisher Scientific LTQ Orbitrap XL (nanoESI-MS) spectrometer. MALDI-ToF mass spectra were obtained on a Voyager-De<sup>TM</sup> Pro measured in *m/z*. The chromatographic purity of final compounds was determined by high performance liquid chromatography (HPLC) analyses on an Ultimate 3000SD System from ThermoFisher with LPG-3400SD pump system, ACC-3000 autosampler and column oven, and DAD-3000 diode array detector. An Acclaim-120 C18 reversed-phase column from ThermoFisher was used as stationary phase. Gradient elution (5:95 for 0.2 min, 5:95  $\rightarrow$  100:0 over 10 min, 100:0 for 3 min) of the mobile phase consisting of CH<sub>3</sub>CN / MeOH:H<sub>2</sub>O (10:90) was used at a flow rate of 0.5 mL / min at 40 °C. The purity of all final compounds was higher than 95% (except for **9r**: 92.9%).

## Chemical Procedures

**General procedure 1 (GP1).** To a solution of the respective carboxylic acid (1.0-1.5 equiv) in anhydrous *N,N*-dimethylformamide (DMF, approx. 1 mL / 0.18 mmol), *O*-(1*H*-6-chlorobenzotriazole-1-yl)-1,1,3,3-tetramethyluronium hexafluorophosphate (HCTU, 1.1 equiv) and *N,N*-diisopropylethylamine (3.2 equiv) were added at 0 °C under nitrogen atmosphere. The resulting mixture was stirred for 5 min at 0 °C, then **15** or the respective HCl salt (1.0 equiv) was added and the reaction was stirred at room temperature for 4-16 h. After completion of the reaction, DMF was removed under high vacuum. The crude was dissolved in DCM and the organic layer was washed with deionized H<sub>2</sub>O (2 x) and an aqueous saturated Na<sub>2</sub>CO<sub>3</sub>-solution (3 x). The organic layer was dried over Na<sub>2</sub>SO<sub>4</sub>, filtered and concentrated under reduced pressure. The crude product was purified by column chromatography on silica gel and then recrystallized from DCM / pentane.

**General procedure 2 (GP2).** To a solution of the respective Boc-protected amine (1.0 equiv.) in THF (approx. 1 mL / 0.10 mmol), a 4 M solution of HCl in dioxane (17 equiv.) was added dropwise. The mixture was stirred at room temperature for 3-16 h. The mixture was reduced to dryness under reduced pressure. The product was precipitated from ACN, filtered and washed with cold ACN. The HCl salt of the product was used for the next step without further purification.

**General procedure 3 (GP3).** Compound **15** (1 equiv.), the respective bromo derivative (1 equiv.) and K<sub>2</sub>CO<sub>3</sub> (4 equiv.) were charged in a flask under nitrogen atmosphere. Dry DMF (approx. 1 mL / 0.33 mmol) was added and the reaction was stirred at 80 °C overnight. After completion of the reaction monitored by TLC, the solvent was removed under reduced pressure. The crude was dissolved in DCM and washed with water (2x). The organic layer was dried over anhydrous Na<sub>2</sub>SO<sub>4</sub>, filtered and concentrated under reduced pressure. The crude product was purified by column chromatography on silica gel.



1-acryloyl-*N*-(2-(4-(4-(2-amino-4-(difluoromethyl)pyrimidin-5-yl)-6-morpholino-1,3,5-triazin-2-yl)piperazin-1-yl)-2-oxoethyl)piperidine-4-carboxamide (**1**)

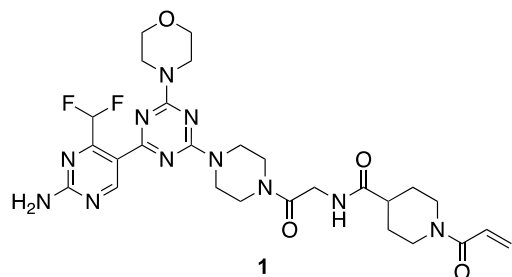

Compound **1** was prepared according to the literature.<sup>1</sup>

1-acryloyl-*N*-(2-(4-(4-(2-amino-4-(difluoromethyl)pyrimidin-5-yl)-6-morpholino-1,3,5-triazin-2-yl)piperazin-1-yl)-2-oxoethyl)-*N*-methylpiperidine-4-carboxamide (**2**)

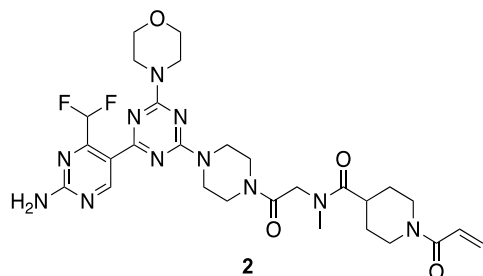

Compound **2** was prepared according to the literature.<sup>1</sup>

1-(4-(((2-(4-(4-(2-amino-4-(difluoromethyl)pyrimidin-5-yl)-6-morpholino-1,3,5-triazin-2-yl)piperazin-1-yl)-2-oxoethyl)(methyl)amino)methyl)piperidin-1-yl)prop-2-en-1-one (**3**)

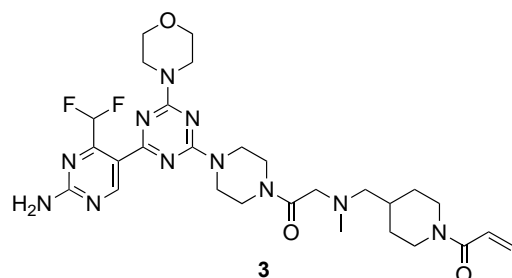

Compound **3** was prepared according to **GP1** from intermediate **20** (191 mg, 0.32 mmol, 1.0 equiv). Purification by column chromatography on silica gel (DCM / methanol / ammonia: 100:0:0 → 97:3:0.03) gave compound **3** as a colorless solid (14 mg, 0.023 mmol, 7%). **<sup>1</sup>H NMR** (400 MHz, CDCl<sub>3</sub>): δ 9.23 (s, 1 H), 7.61 (t, *J* = 54.4 Hz, 1 H), 6.58 (dd, *J* = 16.8, 10.6 Hz, 1 H), 6.25 (d, *J* = 16.8 Hz, 1 H), 5.79 (br s, 2 H), 5.67 (d, *J* = 10.6 Hz, 1 H), 4.70-4.60 (m, 1 H), 4.05-3.96 (m, 1 H), 3.94-3.80 (m, 6 H), 3.81-3.72 (m, 4 H), 3.73-3.60 (m, 4 H), 3.49 (s, 1 H), 3.22 (s, 2 H), 3.11-2.99 (m, 1 H), 2.70-2.60 (m, 1 H), 2.28 (s, 3 H), 1.90-1.70 (m, 4 H), 1.17-1.02 (m, 2 H), 0.93-0.79 (m, 2 H) ppm. **<sup>19</sup>F{<sup>1</sup>H} NMR** (376 MHz, CDCl<sub>3</sub>): δ -121.62 (s, 2 F) ppm. **<sup>13</sup>C{<sup>1</sup>H} NMR** (101 MHz, CDCl<sub>3</sub>): δ 169.02 (s, 1 C), 167.74 (s, 1 C), 165.41 (s, 1 C),

164.54 (s, 2 C), 163.33 (s, 1 C), 162.46 (s, 1 C), 159.51 (s, 1 C), 127.89 (s, 1 C), 127.47 (s, 1 C), 119.82 (s, 1 C), 109.49 (t,  $J = 240.7$  Hz, 1 C), 66.74 (s, 2 C), 63.39 (s, 1 C), 62.53 (s, 1 C), 45.96 (br s, 1 C), 45.43 (br s, 1 C), 43.69-42.92 (m, 4 C), 42.17 (br s, 1 C), 41.75 (br s, 1 C), 34.21 (s, 1 C), 31.35 (s, 1 C), 30.25 (s, 1 C), 29.27 (s, 1 C) ppm. **HRMS** ( $m/z$ ):  $[M + H]^+$  calc. for  $C_{28}H_{40}F_2N_{11}O_3$ , 616.3278; found: 616.3283;  $[M + Na]^+$  calc. for  $C_{28}H_{39}F_2N_{11}NaO_3$ , 638.3098; found: 638.3102. **HPLC** (ACN with 0.1% TFA):  $t_R = 5.32$  min (96.6% purity).

1-acryloyl-*N*-(2-(4-(4-(2-amino-4-(difluoromethyl)pyrimidin-5-yl)-6-morpholino-1,3,5-triazin-2-yl)piperazin-1-yl)ethyl)piperidine-4-carboxamide (**4**)

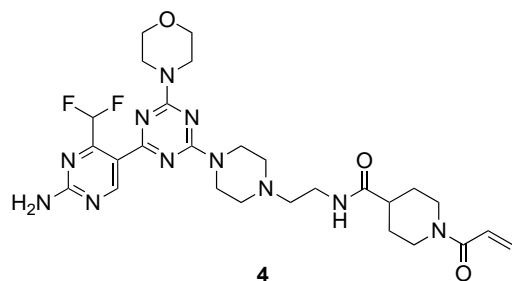

Compound **4** was prepared according to **GP1** from intermediate **24** (263 mg, 0.45 mmol, 1.0 equiv). Purification by column chromatography on silica gel (DCM / methanol / ammonia: 100:0:0 → 97:3:0.03) gave compound **4** as a colorless solid (114 mg, 0.19 mmol, 42%). **<sup>1</sup>H NMR** (400 MHz,  $CDCl_3$ ):  $\delta$  9.23 (s, 1 H), 7.62 (t,  $J = 54.4$  Hz, 1 H), 6.58 (dd,  $J = 16.8$  Hz,  $^3J_{H,H} = 10.6$  Hz, 1 H), 6.27 (dd,  $J = 16.8$  Hz,  $J = 1.9$  Hz, 1 H), 6.06 (br s, 1 H), 5.69 (dd,  $J = 10.6$  Hz,  $J = 1.9$  Hz, 1 H), 5.53 (br s, 2 H), 4.71-4.60 (m, 1 H), 4.10-3.99 (m, 1 H), 3.95-3.79 (m, 8 H), 3.78-3.69 (m, 4 H), 3.40 (q,  $J = 5.6$  Hz, 2 H), 3.18-3.08 (m, 1 H), 2.83-2.72 (m, 1 H), 2.57-2.45 (m, 6 H), 2.44-2.35 (m, 1 H), 1.97-1.87 (m, 2 H), 1.77-1.64 (m, 2 H) ppm. **<sup>19</sup>F{<sup>1</sup>H} NMR** (376 MHz,  $CDCl_3$ ):  $\delta$  -121.70 (s, 2 F) ppm. **<sup>13</sup>C{<sup>1</sup>H} NMR** (101 MHz,  $CDCl_3$ ):  $\delta$  173.95 (s, 1 C), 167.63 (s, 1 C), 165.49 (s, 1 C), 164.55 (s, 1 C), 164.31 (s, 1 C), 163.44 (s, 1 C), 162.48 (s, 1 C), 159.43 (t,  $J = 21.4$  Hz, 1 C), 127.74 (s, 1 C), 127.68 (s, 1 C), 119.70 (t,  $J = 3.7$  Hz, 1 C), 109.51 (t,  $J = 240.7$  Hz, 1 C), 66.73 (s, 2 C), 56.67 (s, 1 C), 52.69 (s, 1 C), 45.36 (s, 1 C), 43.64 (br s, 1 C), 43.30-42.95 (m, 2 C), 43.01 (s, 1 C), 41.52 (s, 1 C), 35.83 (s, 1 C), 30.94 (s, 1 C), 29.16 (s, 1 C), 29.11 (s, 1 C), 28.54 (s, 1 C) ppm. **HRMS** ( $m/z$ ):  $[M + H]^+$  calc. for  $C_{27}H_{38}F_2N_{11}O_3$ , 602.3122; found: 602.3126;  $[M + Na]^+$  calc. for  $C_{27}H_{37}F_2N_{11}NaO_3$ , 624.2941; found: 624.2942. **HPLC** (ACN with 0.1% TFA):  $t_R = 4.90$  min (97.0% purity).

1-(4-(4-(4-(4-(2-amino-4-(difluoromethyl)pyrimidin-5-yl)-6-morpholino-1,3,5-triazin-2-yl)piperazine-1-carbonyl)benzyl)piperidin-1-yl)prop-2-en-1-one (**5**)

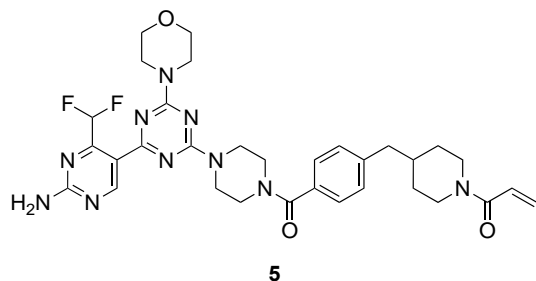

Compound **5** was prepared according to **GP1** from intermediate **26** (150 mg, 0.24 mmol, 1.0 equiv). Purification by column chromatography on silica gel (DCM / methanol / ammonia: 100:0:0 → 96:4:0.04) gave compound **5** as a colorless solid (42.6 mg, 0.066 mmol, 27%). **<sup>1</sup>H NMR** (400 MHz, CDCl<sub>3</sub>): δ 9.22 (s, 1 H), 7.59 (t, *J* = 54.4 Hz, 1 H), 7.38 (d, *J* = 8.1 Hz, 2 H), 7.20 (d, *J* = 8.0 Hz, 2 H), 6.57 (dd, *J* = 16.8, 10.6 Hz, 1 H), 6.26 (dd, *J* = 16.8, 1.9 Hz, 1 H), 5.66 (dd, *J* = 10.6, 1.9 Hz, 1 H), 5.59 (s, 2 H), 4.66 (d, *J* = 14.8 Hz, 1 H), 4.05-3.47 (m, 17 H), 3.00 (t, *J* = 13.5 Hz, 1 H), 2.63-2.53 (m, 3 H), 1.86-1.67 (m, 2 H), 1.30-0.98 (m, 3 H) ppm. **<sup>19</sup>F{<sup>1</sup>H} NMR** (376 MHz, CDCl<sub>3</sub>): δ -121.68 (s, 2 F) ppm. **<sup>13</sup>C{<sup>1</sup>H} NMR** (101 MHz, CDCl<sub>3</sub>): δ 170.75 (s, 1 C), 167.85 (s, 1 C), 165.42 (s, 1 C), 164.62 (s, 1 C), 164.58 (s, 1 C), 163.48 (s, 1 C), 162.54 (s, 1 C), 159.56 (t, *J* = 20.8 Hz, 1 C), 142.26 (s, 1 C), 133.25 (s, 1 C), 129.36 (s, 2 C), 128.00 (s, 1 C), 127.43 (s, 1 C), 127.36 (s, 2 C), 119.64 (t, *J* = 3.8 Hz, 1 C), 109.56 (t, *J* = 240.9 Hz, 1 C), 66.77 (s, 2 C), 46.15 (s, 1 C), 43.73 (s, 4 C), 42.80 (s, 2 C), 42.38 (s, 2 C), 38.21 (s, 1 C), 32.67 (s, 1 C), 31.74 (s, 1 C) ppm. **HRMS** (*m/z*): [M + H]<sup>+</sup> calc. for C<sub>32</sub>H<sub>39</sub>F<sub>2</sub>N<sub>10</sub>O<sub>3</sub>, 649.3169; found: 649.3162; [M + Na]<sup>+</sup> calc. for C<sub>32</sub>H<sub>38</sub>F<sub>2</sub>N<sub>10</sub>NaO<sub>3</sub>, 671.2989; found: 671.2989. **HPLC** *t<sub>R</sub>* = 7.82 min (98.9% purity).

1-(4-(3-(4-(4-(2-amino-4-(difluoromethyl)pyrimidin-5-yl)-6-morpholino-1,3,5-triazin-2-yl)piperazine-1-carbonyl)benzyl)piperidin-1-yl)prop-2-en-1-one (**6**)

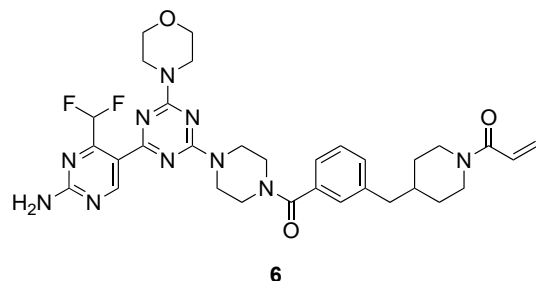

Compound **6** was prepared according to **GP1** from intermediate **28** (130 mg, 0.21 mmol, 1.0 equiv). Purification by column chromatography on silica gel (DCM / methanol / ammonia: 100:0:0 → 96:4:0.04) gave compound **6** as a light-yellow solid (28.3 mg, 0.044 mmol, 16%). **<sup>1</sup>H NMR** (400 MHz, CDCl<sub>3</sub>): δ 9.22 (s, 1 H), 7.58 (t, *J* = 54.3 Hz, 1 H), 7.36 (t, *J* = 7.8 Hz, 1 H), 7.28 (s, 1 H), 7.24-7.20 (m, 2 H), 6.56 (dd, *J* = 16.8, 10.6 Hz, 1 H), 6.25 (dd, *J* = 16.8, 1.9 Hz,

1 H), 5.66 (dd,  $J = 10.6, 1.9$  Hz, 1 H), 5.58 (s, 2 H), 4.65 (d,  $J = 13.3$  Hz, 1 H), 3.99-3.61 (m, 16 H), 3.51 (br s, 1 H), 2.99 (t,  $J = 12.6$  Hz, 1 H), 2.68-2.52 (m, 3 H), 1.89-1.76 (m, 1 H), 1.71 (d,  $J = 9.5$  Hz, 2 H), 1.26-1.15 (m, 2 H) ppm.  **$^{19}\text{F}\{^1\text{H}\}$  NMR** (376 MHz,  $\text{CDCl}_3$ ):  $\delta$  -121.68 (s, 2 F) ppm.  **$^{13}\text{C}\{^1\text{H}\}$  NMR** (101 MHz,  $\text{CDCl}_3$ ):  $\delta$  170.85 (s, 1 C), 167.90 (s, 1 C), 165.50 (s, 1 C), 164.69 (s, 1 C), 164.64 (s, 1 C), 163.47 (s, 1 C), 162.58 (s, 1 C), 159.65 (s, 1 C), 140.76 (s, 1 C), 135.64 (s, 1 C), 130.87 (s, 1 C), 128.70 (s, 1 C), 128.03 (s, 1 C), 127.82 (s, 1 C), 127.51 (s, 1 C), 124.90 (s, 1 C), 119.82 (s, 1 C), 109.60 (t,  $J = 241.0$  Hz, 1 C), 66.83 (s, 2 C), 46.20 (s, 1 C), 43.79 (s, 2 C), 42.91 (s, 1 C), 42.43 (s, 1 C), 38.23 (s, 1 C), 35.54 (s, 1 C), 32.74 (s, 1 C), 31.83 (s, 1 C), 26.55 (s, 1 C) 26.44 (s, 1 C), 22.81 (s, 1 C) ppm. **HRMS** ( $m/z$ ):  $[\text{M} + \text{H}]^+$  calc. for  $\text{C}_{32}\text{H}_{39}\text{F}_2\text{N}_{10}\text{O}_3$ , 649.3169; found: 649.3170;  $[\text{M} + \text{Na}]^+$  calc. for  $\text{C}_{32}\text{H}_{38}\text{F}_2\text{N}_{10}\text{NaO}_3$ , 671.2989; found: 671.2991. **HPLC**:  $t_R = 7.83$  min (96.9% purity).

4-(1-acryloylpiperidin-4-yl)-1-(4-(4-(2-amino-4-(difluoromethyl)pyrimidin-5-yl)-6-morpholino-1,3,5-triazin-2-yl)piperazin-1-yl)butan-1-one (**7**)

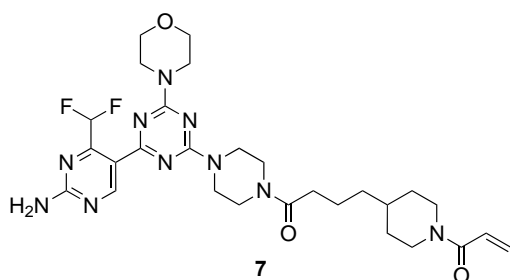

Compound **7** was prepared according to **GP1** from intermediate **30** (250 mg, 0.60 mmol, 1.0 equiv). Purification by column chromatography on silica gel (DCM / methanol / ammonia: 100:0:0  $\rightarrow$  97:3:0.03) gave compound **7** as a colorless solid (141 mg, 0.23 mmol, 39%).  **$^1\text{H}$  NMR** (400 MHz,  $\text{CDCl}_3$ ):  $\delta$  9.23 (s, 1 H), 7.60 (t,  $J = 54.4$  Hz, 1 H), 6.58 (dd,  $J = 16.8, 10.6$  Hz, 1 H), 6.25 (dd,  $J = 16.8, 2.0$  Hz, 1 H), 5.65 (dd,  $J = 10.5, 2.0$  Hz, 1 H), 5.63 (br s, 2 H), 4.67-4.61 (m, 1 H), 4.01-3.95 (m, 1 H), 3.93-3.80 (m, 8 H), 3.78-3.73 (m, 4 H), 3.72-3.67 (m, 2 H), 3.57-3.52 (m, 2 H), 3.03 (t,  $J = 12.6$  Hz, 1 H), 2.62 (t,  $J = 12.7$  Hz, 1 H), 2.37 (t,  $J = 7.5$  Hz, 2 H), 1.82-1.63 (m, 4 H), 1.59-1.49 (m, 1 H), 1.35-1.27 (m, 2 H), 1.20-1.09 (m, 2 H) ppm.  **$^{19}\text{F}\{^1\text{H}\}$  NMR** (376 MHz,  $\text{CDCl}_3$ ):  $\delta$  -121.63 (s, 2 F) ppm.  **$^{13}\text{C}\{^1\text{H}\}$  NMR** (101 MHz,  $\text{CDCl}_3$ ):  $\delta$  171.52 (s, 1 C), 167.77 (s, 1 C), 165.33 (s, 1 C), 164.53 (s, 1 C), 164.52 (s, 1 C), 163.39 (s, 1 C), 162.47 (s, 1 C), 159.54 (t,  $J = 21.5$  Hz, 1 C), 128.03 (s, 1 C), 127.20 (s, 1 C), 119.69 (s, 1 C), 109.50 (t,  $J = 240.9$  Hz, 1 C), 66.72 (s, 2 C), 46.18 (s, 1 C), 45.27 (br s, 1 C), 43.69-42.86 (m, 4 C), 42.39 (s, 1 C), 41.28 (br s, 1 C), 36.14 (s, 1 C), 36.13 (s, 1 C), 33.38 (s, 1 C), 32.84 (s, 1 C), 31.87 (s, 1 C), 22.30 (s, 1 C) ppm. **HRMS** ( $m/z$ ):  $[\text{M} + \text{H}]^+$  calc. for  $\text{C}_{28}\text{H}_{39}\text{F}_2\text{N}_{10}\text{O}_3$ , 601.3169; found: 601.3169;  $[\text{M} + \text{Na}]^+$  calc. for  $\text{C}_{28}\text{H}_{38}\text{F}_2\text{N}_{10}\text{NaO}_3$ , 623.2989; found: 623.2984. **HPLC**:  $t_R = 7.22$  min (99.0% purity).

1-(4-(4-(2-amino-4-(difluoromethyl)pyrimidin-5-yl)-6-morpholino-1,3,5-triazin-2-yl)piperazin-1-yl)-4-(1-propionylpiperidin-4-yl)butan-1-one (**7r**)

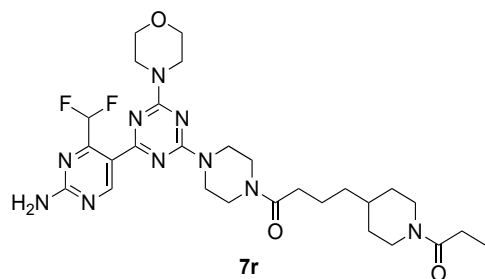

Compound **7r** was prepared according to **GP1** from intermediate **30** (300 mg, 0.51 mmol, 1.0 equiv). Purification by column chromatography on silica gel (DCM / methanol / ammonia: 100:0:0 → 96:4:0.04) gave compound **7r** as a colorless solid (190 mg, 0.32 mmol, 62%). **<sup>1</sup>H NMR** (400 MHz, CDCl<sub>3</sub>): δ 9.21 (s, 1 H), 7.59 (t, *J* = 54.4 Hz, 1 H), 6.01 (s, 2 H), 4.63 – 4.54 (m, 1 H), 3.93-3.77 (m, 10 H), 3.77-3.72 (m, 4 H), 3.68 (t, *J* = 5.1 Hz, 2 H), 3.52 (t, *J* = 5.3 Hz, 2 H), 2.95 (td, *J* = 12.9, 2.7 Hz, 1 H), 2.50 (td, *J* = 12.9, 2.8 Hz, 1 H), 2.38- 2.27 (m, 4 H), 1.79-1.63 (m, 4 H), 1.54- 1.43 (m, 1 H), 1.34-1.24 (m, 2 H), 1.12 (t, *J* = 7.5 Hz, 4 H) ppm. **<sup>19</sup>F{<sup>1</sup>H} NMR** (376 MHz, CDCl<sub>3</sub>): δ -121.63 (s, 2 F) ppm. **<sup>13</sup>C{<sup>1</sup>H} NMR** (101 MHz, CDCl<sub>3</sub>): δ 172.16 (s, 1 C), 171.61 (s, 1 C), 167.82 (s, 1 C), 164.58 (s, 1 C), 164.57 (s, 1 C), 163.50 (s, 1 C), 162.54 (s, 1 C), 159.46 (t, *J* = 21.4 Hz, 1 C), 119.67 (s, 1 C), 109.57 (t, *J* = 241.3 Hz, 1 C), 66.78 (s, 2 C), 45.81 (s, 1 C), 45.33 (s, 1 C), 43.75 (s, 2 C), 43.40 (br s, 2 C), 42.03 (s, 1 C), 41.35 (s, 1 C), 36.24 (s, 1 C), 36.20 (s, 1 C), 33.45 (s, 1 C), 32.81 (s, 1 C), 32.01 (s, 1 C), 26.66 (s, 1 C), 22.37 (s, 1 C), 9.70 (s, 1 C) ppm. **HRMS** (*m/z*): [M + Na]<sup>+</sup> calc. for C<sub>28</sub>H<sub>40</sub>F<sub>2</sub>N<sub>11</sub>NaO<sub>3</sub>, 625.3145; found: 625.3142. **HPLC** *t<sub>R</sub>* = 7.41 min (> 99.9% purity).

1-(4-((2-(4-(4-(2-amino-4-(difluoromethyl)pyrimidin-5-yl)-6-morpholino-1,3,5-triazin-2-yl)piperazin-1-yl)-2-oxoethoxy)methyl)piperidin-1-yl)prop-2-en-1-one (**8**)

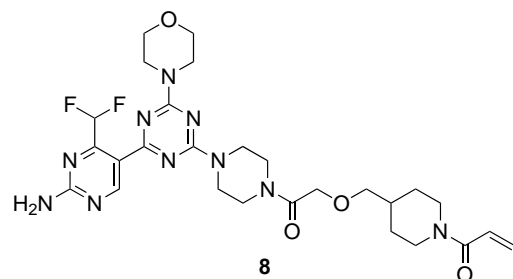

Compound **8** was prepared according to **GP1** from intermediate **36** (653 mg, 0.99 mmol, 1.0 equiv). Purification by column chromatography on silica gel (DCM / methanol / ammonia: 100:0:0 → 92:8:0.08) gave compound **8** as a colorless solid (183 mg, 0.30 mmol, 31%). **<sup>1</sup>H NMR** (400 MHz, CDCl<sub>3</sub>): δ 9.23 (s, 1 H), 7.59 (t, *J* = 54.4 Hz, 1 H), 6.57 (dd, *J* = 16.8, 10.6 Hz, 1 H), 6.25 (dd, *J* = 16.8, 2.0 Hz, 1 H), 5.66 (dd, *J* = 10.6, 2.0 Hz, 1 H), 5.61 (br s, 2 H), 4.72-4.63 (m, 1 H), 4.19 (s, 2 H), 4.06-3.98 (m, 1 H), 3.95-3.79 (m, 8 H), 3.79-3.73 (m, 4 H),

3.72-3.65 (m, 2 H), 3.62-3.55 (m, 2 H), 3.39 (d,  $J = 6.2$  Hz, 2 H), 3.06 (t,  $J = 13.1$  Hz, 1 H), 2.65 (t,  $J = 12.6$  Hz, 1 H), 1.96-1.87 (m, 1 H), 1.88-1.75 (m, 2 H), 1.29-1.17 (m, 2 H) ppm.  $^{19}\text{F}\{^1\text{H}\}$  NMR (376 MHz,  $\text{CDCl}_3$ ):  $\delta$  -121.64 (s, 2 F) ppm.  $^{13}\text{C}\{^1\text{H}\}$  NMR (101 MHz,  $\text{CDCl}_3$ ):  $\delta$  167.95 (s, 1 C), 167.80 (s, 1 C), 165.41 (s, 1 C), 164.53 (s, 2 C), 163.42 (s, 1 C), 162.49 (s, 1 C), 159.52 (t,  $J = 21.5$  Hz, 1 C), 127.90 (s, 1 C), 127.44 (s, 1 C), 119.65 (s, 1 C), 109.51 (t,  $J = 240.9$  Hz, 1 C), 75.86 (s, 1 C), 70.83 (s, 1 C), 66.72 (s, 2 C), 45.78 (s, 1 C), 44.94 (s, 1 C), 43.68-42.91 (m, 4 C), 41.96 (s, 1 C), 41.60 (s, 1 C), 36.59 (s, 1 C), 29.78 (s, 1 C), 28.61 (s, 1 C) ppm. **HRMS** ( $m/z$ ):  $[\text{M} + \text{H}]^+$  calc. for  $\text{C}_{27}\text{H}_{37}\text{F}_2\text{N}_{10}\text{O}_4$ , 603.2962; found: 603.2961;  $[\text{M} + \text{Na}]^+$  calc. for  $\text{C}_{27}\text{H}_{36}\text{F}_2\text{N}_{10}\text{NaO}_4$ , 625.2781; found: 625.2783. **HPLC**:  $t_{\text{R}} = 6.62$  min (98.9% purity).

(S)-1-(4-((2-(4-(4-(2-amino-4-(difluoromethyl)pyrimidin-5-yl)-6-(3-methylmorpholino)-1,3,5-triazin-2-yl)piperazin-1-yl)-2-oxoethoxy)methyl)piperidin-1-yl)propan-1-one (**9**)

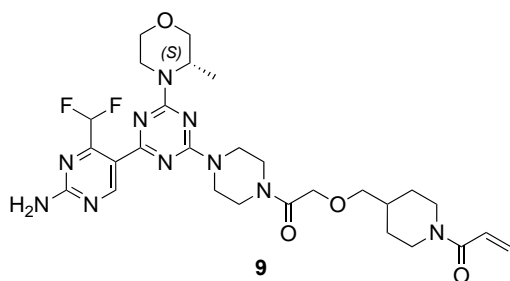

Compound **9** was prepared according to **GP1** from intermediate **38** (370 mg, 0.62 mmol, 1.0 equiv). Purification by column chromatography on silica gel (DCM / methanol / ammonia: 100:0:0  $\rightarrow$  95:5:0.05) gave compound **9** as a light-yellow solid (92.7 mg, 0.15 mmol, 24%).  $^1\text{H}$  NMR (400 MHz,  $\text{CDCl}_3$ ):  $\delta$  9.24 (s, 1 H), 7.61 (t,  $J = 54.4$  Hz, 1 H), 6.57 (dd,  $J = 16.8, 10.6$  Hz, 1 H), 6.25 (dd,  $J = 16.8, 2.0$  Hz, 1 H), 5.66 (dd,  $J = 10.6, 2.0$  Hz, 1 H), 5.58 (s, 2 H), 4.79-4.62 (m, 1 H), 4.48-4.33 (m, 1 H), 4.18 (s, 2 H), 3.99 (dd,  $J = 11.4, 3.8$  Hz, 2 H), 3.95-3.75 (m, 4 H), 3.73-3.64 (m, 3 H), 3.62-3.47 (m, 3 H), 3.39 (d,  $J = 6.2$  Hz, 2 H), 3.29 (t,  $J = 12.7$  Hz, 1 H), 3.06 (t,  $J = 12.8$  Hz, 1 H), 2.64 (t,  $J = 12.6$  Hz, 1 H), 1.99-1.73 (m, 2 H), 1.33 (d,  $J = 6.8$  Hz, 3 H), 1.32-1.17 (m, 5 H) ppm.  $^{19}\text{F}\{^1\text{H}\}$  NMR (376 MHz,  $\text{CDCl}_3$ ):  $\delta$  -121.75 (s, 2 F) ppm.  $^{13}\text{C}\{^1\text{H}\}$  NMR (101 MHz,  $\text{CDCl}_3$ ):  $\delta$  168.03 (s, 1 C), 167.82 (s, 1 C), 165.49 (s, 1 C), 164.65 (s, 1 C), 164.28 (s, 1 C), 163.43 (s, 1 C), 162.54 (s, 1 C), 159.63 (s, 1 C), 127.98 (s, 1 C), 127.52 (s, 1 C), 119.80 (s, 1 C), 109.60 (t,  $J = 241.0$  Hz, 1 C), 75.93 (s, 1 C), 71.06 (s, 1 C), 70.90 (s, 1 C), 67.00 (s, 2 C), 46.64 (s, 1 C), 45.86 (s, 1 C), 45.01 (s, 1 C), 42.04 (s, 1 C), 41.68 (s, 1 C), 38.74 (s, 1 C), 36.67 (s, 1 C), 29.86 (s, 1 C), 29.78 (s, 1 C), 28.69 (s, 1 C) ppm. **HRMS** ( $m/z$ ):  $[\text{M} + \text{Na}]^+$  calc. for  $\text{C}_{28}\text{H}_{38}\text{F}_2\text{N}_{10}\text{NaO}_4$ , 639.2938; found: 639.2941. **HPLC**:  $t_{\text{R}} = 7.05$  min (96.6% purity).

(S)-1-(4-((2-(4-(4-(2-amino-4-(difluoromethyl)pyrimidin-5-yl)-6-(3-methylmorpholino)-1,3,5-triazin-2-yl)piperazin-1-yl)-2-oxoethoxy)methyl)piperidin-1-yl)propan-1-one (**9r**)

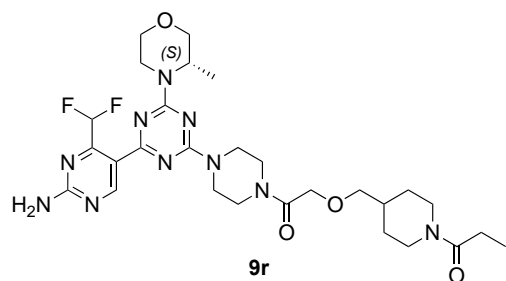

Compound **9r** was prepared according to **GP1** from intermediate **38** (301 mg, 0.50 mmol, 1.0 equiv). Purification by column chromatography on silica gel (DCM / methanol / ammonia: 100:0:0 → 95:5:0.05) followed by preparative TLC (DCM / methanol / ammonia: 94:6:0.06) gave compound **9r** as a light-yellow solid (164 mg, 0.27 mmol, 53%). **<sup>1</sup>H NMR** (400 MHz, CDCl<sub>3</sub>): δ 9.22 (s, 1H), 7.60 (t, *J* = 54.4 Hz, 1H), 6.00 (s, 2H), 4.72 (br s, 1H), 4.64-4.61 (m, 1H), 4.38 (d, *J* = 14.0 Hz, 1H), 4.17 (s, 2H), 3.98 (dd, *J* = 11.3, 3.5 Hz, 1H), 3.93-3.80 (m, 5H), 3.80-3.75 (m, 1H), 3.72-3.62 (m, 3H), 3.61-3.53 (m, 2H), 3.52-3.46 (m, 1H), 3.37 (d, *J* = 5.6 Hz, 2H), 3.33-3.22 (m, 1H), 3.05-2.93 (m, 1H), 2.59-2.48 (m, 1H), 2.32 (q, *J* = 7.5 Hz, 2H), 1.93-1.77 (m, 2H), 1.77-1.68 (m, 1H), 1.32 (d, *J* = 6.8 Hz, 3H), 1.26-1.15 (m, 2H), 1.12 (t, *J* = 7.5 Hz, 3H) ppm. **<sup>19</sup>F{<sup>1</sup>H} NMR** (376 MHz, CDCl<sub>3</sub>): δ -121.68 (s, 2 F) ppm. **<sup>13</sup>C{<sup>1</sup>H} NMR** (101 MHz, CDCl<sub>3</sub>): δ 172.29 (s, 1 C), 168.08 (s, 1 C), 167.85 (s, 1 C), 164.66 (s, 1 C), 164.29 (s, 1 C), 163.51 (s, 1 C), 162.58 (s, 1 C), 159.62 (t, *J* = 21.7 Hz, 1 C), 119.73 (s, 1 C), 109.62 (t, *J* = 241.2 Hz, 1 C), 76.04 (s, 1 C), 71.07 (s, 1 C), 70.92 (s, 1 C), 67.01 (s, 1 C), 46.64 (s, 1 C), 45.43 (s, 1 C), 45.03 (s, 1 C), 43.47 (s, 1 C), 42.95 (s, 1 C), 41.71 (s, 1 C), 41.63 (s, 1 C), 38.75 (s, 1 C), 36.69 (s, 1 C), 29.78 (s, 1 C), 28.77 (s, 1 C), 26.68 (s, 1 C), 14.45 (s, 1 C), 9.69 (s, 1 C) ppm. **HRMS** (*m/z*): [M + Na]<sup>+</sup> calc. for C<sub>28</sub>H<sub>38</sub>F<sub>2</sub>N<sub>10</sub>NaO<sub>4</sub>, 641.3094; found: 641.3107. **HPLC**: *t<sub>R</sub>* = 7.17 min (92.9% purity).

#### 2,4-Dichloro-6-(morpholin-4-yl)-1,3,5-triazine (**11**)

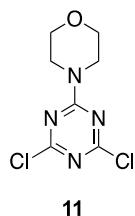

Compound **11** was prepared according to the literature.<sup>15</sup>

(S)-4-(4,6-dichloro-1,3,5-triazin-2-yl)-3-methylmorpholine (**12**)

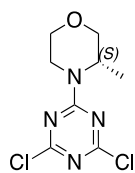

**12**

Compound **12** was prepared according to the literature.<sup>16</sup>

*tert*-butyl 4-(4-chloro-6-morpholino-1,3,5-triazin-2-yl)piperazine-1-carboxylate (**13**)

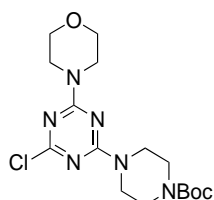

**13**

To a solution of 2,4-dichloro-6-(morpholin-4-yl)-1,3,5-triazine (**11**) (20.7 g, 87.9 mmol, 0.9 equiv) in ethanol, DIPEA (16.2 g, 21.4 mL, 125.6 mmol, 1.3 equiv) and 1-Boc-piperazine (18.0 g, 96.6 mmol, 1.0 equiv) were added at 0 °C. The reaction mixture was stirred at room temperature for 5 h. The solvent was removed under reduced pressure. DCM (300 mL) was added and the resulting organic layer was washed with an aqueous saturated NaHSO<sub>4</sub>-solution (4 x 200 mL). The organic layer was dried over anhydrous Na<sub>2</sub>SO<sub>4</sub>, filtered and concentrated under reduced pressure. The product was recrystallized from DCM / heptane to obtain compound **13** as a colorless solid (22.7 g, 58.9 mmol, 80%). **<sup>1</sup>H NMR** (400 MHz, CDCl<sub>3</sub>): δ 3.85-3.69 (m, 12 H), 3.50-3.43 (m, 4 H), 1.48 (s, 9 H) ppm. **<sup>13</sup>C{<sup>1</sup>H} NMR** (101 MHz, CDCl<sub>3</sub>): δ 169.68 (s, 1 C), 164.47 (s, 2 C), 154.62 (s, 1 C), 80.24 (s, 1 C), 66.69 (s, 2 C), 66.54 (s, 2 C), 43.86 (s, 2 C), 43.28 (s, 2 C), 28.39 (s, 3 C) ppm. **MALDI-MS**: *m/z* = 385.643 [M + H]<sup>+</sup>. **HPLC**: *t<sub>R</sub>* = 6.53 min (100.0 % purity).

*tert*-butyl (S)-4-(4-chloro-6-(3-methylmorpholino)-1,3,5-triazin-2-yl)piperazine-1-carboxylate (**14**)

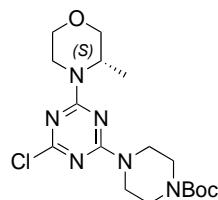

**14**

To a solution of (S)-4-(4,6-dichloro-1,3,5-triazin-2-yl)-3-methylmorpholine (**12**) (30.3 g, 122 mmol, 1.0 equiv) in ethanol, DIPEA (23.7 g, 32.1 mL, 184 mmol, 1.5 equiv) and 1-Boc-piperazine (27.3 g, 146 mmol, 1.2 equiv) were added at 0 °C. The reaction mixture was stirred



at room temperature for 3 h. The solvent was removed under reduced pressure. DCM (300 mL) was added and the resulting organic layer was washed with an aqueous saturated NaHSO<sub>4</sub>-solution (4 x 200 mL). The organic layer was dried over anhydrous Na<sub>2</sub>SO<sub>4</sub>, filtered and concentrated under reduced pressure. The product was recrystallized from DCM / heptane to obtain compound **14** as a colorless solid (51.2 g, 128 mmol, quantitative yield). **<sup>1</sup>H NMR** (400 MHz, CDCl<sub>3</sub>): δ 4.66 (s, 1 H), 4.33 (t, *J* = 7.1 Hz, 1 H), 3.94 (dd, *J* = 11.5, 3.7 Hz, 1 H), 3.84-3.69 (m, 5 H), 3.63 (dd, *J* = 11.5, 3.3 Hz, 1 H), 3.47 (m, 5 H), 3.25 (ddd, *J* = 13.7, 12.3, 3.8 Hz, 1 H), 1.48 (s, 9 H), 1.30 (d, *J* = 6.9 Hz, 3 H) ppm. **<sup>13</sup>C{<sup>1</sup>H} NMR** (101 MHz, CDCl<sub>3</sub>): δ 169.70 (s, 1 C), 164.55 (s, 1 C), 164.23 (s, 1 C), 154.67 (s, 1 C), 80.25 (s, 1 C), 79.88 (s, 1 C), 70.86 (s, 1 C), 66.84 (s, 1 C), 46.70 (s, 2 C), 43.28 (s, 2 C), 38.86 (s, 1 C), 28.40 (s, 3 C), 14.12 (s, 1 C) ppm. **MALDI-MS**: *m/z* = 399.661 [M + H]<sup>+</sup>.

4-(difluoromethyl)-5-(4-morpholino-6-(piperazin-1-yl)-1,3,5-triazin-2-yl)pyrimidin-2-amine  
(**15**).

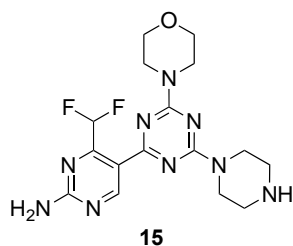

**Step 1.** The bromo derivative **39** (7.00 g, 16.5 mmol, 1.0 equiv), bis(pinacolato)diboron (6.29 g, 24.75 mmol, 1.5 equiv), potassium acetate (5.02 g, 51.2 mmol, 3.1 equiv), [1,1'-bis(diphenylphosphino)ferrocene]dichloropalladium(II) (Pd(dppf)Cl<sub>2</sub>, 1.21 g, 1.65 mmol, 0.1 equiv) were charged in flask under nitrogen atmosphere. Absolute 1,4-dioxane (40 mL) was added and the mixture was stirred at 95 °C for 1.5 h. After completion of the reaction, the mixture was allowed to cool down to room temperature. **Step 2.** Monochloro-triazine **13** (6.99 g, 18.2 mmol, 1.1 equiv), chloro(2-dicyclohexylphosphino-2',4',6'-triisopropyl-1,1'-biphenyl)[2-(2'-amino-1,1'-biphenyl)]palladium(II) (XPhos Pd G2, 0.519 g, 0.66 mmol, 0.04 equiv), potassium phosphate tribasic (10.5 g, 49.5 mmol, 3.0 equiv) and deionized H<sub>2</sub>O (10 mL) were added. The resulting mixture was stirred at 100 °C overnight. After completion of the reaction, the mixture was allowed to cool down to room temperature and the crude was filtered on celite. To the solution, deionized H<sub>2</sub>O (300 mL) and ethyl acetate (300 mL) were added. The layers were separated and the organic layer was washed with deionized H<sub>2</sub>O and brine (2x). The aqueous layer was extracted with DCM (2x). The combined organic layers were concentrated under reduced pressure. **Step 3.** The above residue was dissolved in 1,4-dioxane (40 mL) and an aqueous solution of HCl (3 M, 40 mL) was added. The reaction mixture was stirred at 80 °C overnight. After completion of the reaction, the mixture was cool down to room temperature.

Ethyl acetate (200 mL) and deionized H<sub>2</sub>O (200 mL) were added and the two layers were separated. The aqueous layer was washed with ethyl acetate (3x). The aqueous layer was basified to pH = 10. The solid formed was filtered and washed with acetonitrile to obtain compound **15** as a beige solid (4.91 g, 12.5 mmol, 76%). **<sup>1</sup>H NMR** (400 MHz, DMSO-*d*<sub>6</sub>): δ 9.09 (s, 1 H), 7.63 (t, *J* = 54.1 Hz, 1 H), 7.57 (br s, 2 H), 3.86-3.56 (m, 12 H), 2.82-2.63 (s, 4 H) ppm. **<sup>19</sup>F{<sup>1</sup>H} NMR** (376 MHz, DMSO-*d*<sub>6</sub>): δ -120.60 (s, 2 F) ppm. **<sup>13</sup>C{<sup>1</sup>H} NMR** (101 MHz, DMSO-*d*<sub>6</sub>): δ 167.22 (s, 1 C), 163.99 (s, 1 C), 163.73 (s, 1 C), 163.72 (s, 1 C), 161.64 (s, 1 C), 158.82 (t, *J* = 21.2 Hz, 1 C), 117.68 (s, 1 C), 109.80 (t, *J* = 239.2 Hz, 1 C), 65.91 (s, 2 C), 45.43 (s, 2 C), 44.08 (s, 2 C), 43.20 (s, 2 C) ppm. **MALDI-MS**: *m/z* = 394.205 [M + H]<sup>+</sup>.

(*S*)-4-(difluoromethyl)-5-(4-(3-methylmorpholino)-6-(piperazin-1-yl)-1,3,5-triazin-2-yl)pyrimidin-2-amine (**16**)

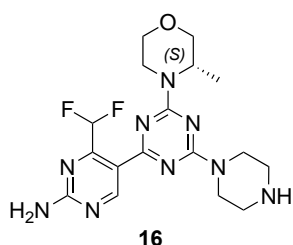

**Step 1.** The bromo derivative **39** (14.5 g, 34.2 mmol, 1.0 equiv), bis(pinacolato)diboron (13.0 g, 51.3 mmol, 1.5 equiv), potassium acetate (10.4 g, 106.2 mmol, 3.1 equiv), [1,1'-bis(diphenylphosphino)ferrocene]dichloropalladium(II) (Pd(dppf)Cl<sub>2</sub>, 1.26 g, 1.72 mmol, 0.05 equiv) were charged in a flask under nitrogen atmosphere. Absolute 1,4-dioxane (65 mL) was added and the mixture was stirred at 95 °C for 3 h. After completion of the reaction, the mixture was allowed to cool down to room temperature. **Step 2.** Monochloro-triazine **14** (15.0 g, 37.6 mmol, 1.1 equiv), chloro(2-dicyclohexylphosphino-2',4',6'-triisopropyl-1,1'-biphenyl)[2-(2'-amino-1,1'-biphenyl)]palladium(II) (XPhos Pd G2, 812 mg, 1.03 mmol, 0.03 equiv), potassium phosphate tribasic (23.6 g, 102.5 mmol, 3.0 equiv) and deionized H<sub>2</sub>O (22 mL) were added. The resulting mixture was stirred at 100 °C overnight. After completion of the reaction, the mixture was allowed to cool down to room temperature and the crude was filtered on celite. To the solution, deionized H<sub>2</sub>O (300 mL) and ethyl acetate (300 mL) were added. The layers were separated and the organic layer was washed with deionized H<sub>2</sub>O and brine (2x). The aqueous layer was extracted with DCM (2x). The combined organic layers were concentrated under reduced pressure. **Step 3.** The above residue was dissolved in 1,4-dioxane (65 mL) and an aqueous solution of HCl (3 M, 150 mL) was added. The reaction mixture was stirred at 80 °C overnight. After completion of the reaction, the mixture was cool down to room temperature. DCM (200 mL) were added to the reaction mixture, the aqueous phase was collected and basified to pH 11 with NaOH pellets. The formed precipitate was filtered and

washed with acetonitrile to obtain compound **16** as a beige solid (7.70 g, 18.9 mmol, 55%). **<sup>1</sup>H NMR** (400 MHz, CDCl<sub>3</sub>): δ 9.24 (s, 1 H), 7.66 (t, *J* = 54.5 Hz, 1 H), 5.57 (s, 2 H), 4.73 (d, *J* = 7.8 Hz, 1 H), 4.40 (d, *J* = 13.6 Hz, 1 H), 3.98 (dd, *J* = 11.4, 3.7 Hz, 1 H), 3.89-3.74 (m, 5 H), 3.73-3.64 (m, 1 H), 3.52 (td, *J* = 11.9, 3.0 Hz, 1 H), 3.27 (td, *J* = 12.8, 3.7 Hz, 1 H), 2.92 (t, *J* = 5.1 Hz, 4 H), 1.32 (d, *J* = 6.8 Hz, 3 H) ppm. **<sup>19</sup>F{<sup>1</sup>H} NMR** (376 MHz, CDCl<sub>3</sub>): δ -121.74 (s, 2 F) ppm. **<sup>13</sup>C{<sup>1</sup>H} NMR** (101 MHz, CDCl<sub>3</sub>): δ 167.64 (s, 1 C), 164.50 (s, 1 C), 164.34 (s, 1 C), 163.46 (s, 1 C), 162.62 (s, 1 C), 159.53 (t, *J* = 21.4 Hz, 1 C), 120.07 (t, *J* = 3.8 Hz, 1 C), 109.61 (t, *J* = 240.8 Hz, 1 C), 71.13 (s, 1 C), 67.07 (s, 1 C), 46.51 (s, 1 C), 46.07 (s, 2 C), 44.49 (s, 2 C), 38.66 (s, 1 C), 14.36 (s, 1 C) ppm. **MALDI-MS**: *m/z* = 408.532 [M + H]<sup>+</sup>.

*tert*-butyl (2-(4-(4-(2-amino-4-(difluoromethyl)pyrimidin-5-yl)-6-morpholino-1,3,5-triazin-2-yl)piperazin-1-yl)-2-oxoethyl)(methyl)carbamate (**17**)

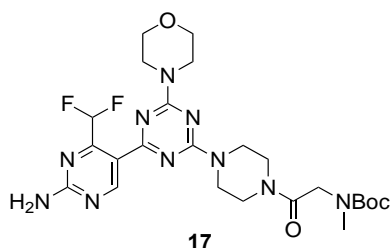

Compound **17** was prepared according to **GP1** from **15** (1.40 g, 3.57 mmol, 1.0 eq.) and *N*-(*tert*-butoxycarbonyl)-*N*-methylglycine (1.01 g, 5.35 mmol, 1.5 eq.). Compound **17** was obtained as a colorless solid (1.40 g, 2.48 mmol, 69%). **<sup>1</sup>H NMR** (400 MHz, CDCl<sub>3</sub>): δ 9.22 (s, 1 H), 7.59 (t, *J* = 54.4 Hz, 1 H), 5.60 (br s, 2 H), 4.15-4.09 (m, 2 H), 4.03-3.80 (m, 8 H), 3.78-3.73 (m, 4 H), 3.73-3.66 (m, 2 H), 3.56-3.48 (m, 2 H), 2.05 (s, 3 H), 1.48 (s, 9 H) ppm. **<sup>19</sup>F{<sup>1</sup>H} NMR** (376 MHz, CDCl<sub>3</sub>): δ -121.68 (s, 2 F) ppm. **<sup>13</sup>C{<sup>1</sup>H} NMR** (101 MHz, CDCl<sub>3</sub>): δ 167.78 (s, 1 C), 167.48 (s, 1 C), 164.53 (s, 1 C), 164.51 (s, 1 C), 163.43 (s, 1 C), 162.47 (s, 1 C), 159.53 (t, *J* = 21.6 Hz, 1 C), 156.19 (s, 1 C), 119.60 (s, 1 C), 109.50 (t, *J* = 240.9 Hz, 1 C), 80.19 (s, 1 C), 66.72 (s, 2 C), 60.40 (s, 1 C), 44.58 (br s, 1 C), 43.69-42.87 (m, 4 C), 41.67 (br s, 1 C), 35.54 (s, 1 C), 28.37 (s, 3 C) ppm. **MALDI-MS**: *m/z* = 565.111 [M + H]<sup>+</sup>.

2-(4-(4-(2-amino-4-(difluoromethyl)pyrimidin-5-yl)-6-morpholino-1,3,5-triazin-2-yl)piperazin-1-yl)-*N*-methyl-2-oxoethan-1-aminium chloride (**18**)

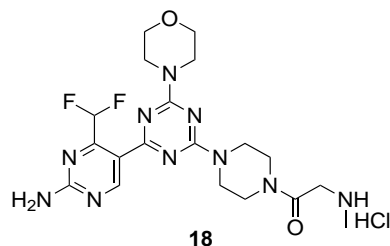

Compound **18** was prepared according to **GP2** from intermediate **17** (1.15 g, 2.04 mmol, 1.0 equiv). Compound **18** was obtained as a colorless solid (1.02 g, 2.04 mmol, quantitative yield).  $^1\text{H NMR}$  (400 MHz, DMSO- $d_6$ ):  $\delta$  9.12 (s, 1 H), 9.07 (br s, 2 H), 7.64 (br s, 2 H), 7.63 (t,  $J$  = 54.0 Hz, 1 H), 4.10 (t,  $J$  = 5.9 Hz, 2 H), 3.90-3.74 (m, 8 H), 3.68-3.64 (m, 4 H), 3.62-3.58 (m, 2 H), 3.50-3.45 (m, 2 H), 2.58-2.55 (m, 3 H) ppm.  $^{19}\text{F}\{^1\text{H}\}$  NMR (376 MHz, DMSO- $d_6$ ):  $\delta$  -120.67 (s, 2 F) ppm. **MALDI-MS**:  $m/z$  = 465.437 [M + H] $^+$ .

*tert*-butyl 4-(((2-(4-(4-(2-amino-4-(difluoromethyl)pyrimidin-5-yl)-6-morpholino-1,3,5-triazin-2-yl)piperazin-1-yl)-2-oxoethyl)(methyl)amino)methyl)piperidine-1-carboxylate (**19**)

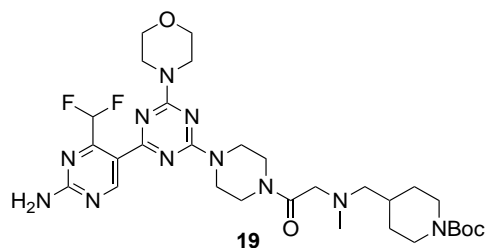

Compound **19** was prepared according to **GP3** from intermediate **18** (651 g, 1.30 mmol, 1 equiv.) and 1-boc-4-bromomethylpiperidine (362 mg, 1.30 mmol, 1 equiv.). Purification by column chromatography on silica gel (DCM / methanol / ammonia: 100:0:0  $\rightarrow$  93:7:0.07) gave compound **19** as a colorless solid (370 mg, 0.56 mmol, 43%).  $^1\text{H NMR}$  (400 MHz, CDCl $_3$ ):  $\delta$  9.23 (s, 1 H), 7.61 (t,  $J$  = 54.4 Hz, 1 H), 5.98 (br s, 2 H), 4.18-4.03 (m, 3 H), 3.94-3.80 (m, 8 H), 3.79-3.73 (m, 4 H), 3.72-3.65 (m, 3 H), 3.56-3.44 (m, 1 H), 2.76-2.63 (m, 2 H), 2.70 (s, 3 H), 1.96-1.60 (m, 5 H), 1.45 (s, 9 H), 1.31-0.99 (m, 3 H) ppm.  $^{19}\text{F}\{^1\text{H}\}$  NMR (376 MHz, CDCl $_3$ ):  $\delta$  -121.65 (s, 2 F) ppm.  $^{13}\text{C}\{^1\text{H}\}$  NMR (101 MHz, CDCl $_3$ ):  $\delta$  169.13 (s, 1 C), 167.78 (s, 1 C), 167.07 (s, 1 C), 164.53 (s, 1 C), 163.41 (s, 1 C), 162.47 (s, 1 C), 159.51 (s, 1 C), 154.86 (s, 1 C), 119.70 (s, 1 C), 109.50 (t,  $J$  = 240.9 Hz, 1 C), 79.41 (s, 1 C), 66.73 (s, 2 C), 63.66 (s, 1 C), 62.88 (br s, 1 C), 45.43 (br s, 2 C), 43.68-43.05 (m, 4 C), 41.62 (br s, 2 C), 35.91 (s, 1 C), 34.10 (s, 1 C), 30.57 (s, 1 C), 28.65 (br s, 1 C), 28.47 (s, 3 C) ppm. **MALDI-MS**:  $m/z$  = 662.218 [M + H] $^+$ .

4-(((2-(4-(4-(2-amino-4-(difluoromethyl)pyrimidin-5-yl)-6-morpholino-1,3,5-triazin-2-yl)piperazin-1-yl)-2-oxoethyl)(methyl)amino)methyl)piperidin-1-ium chloride (**20**)

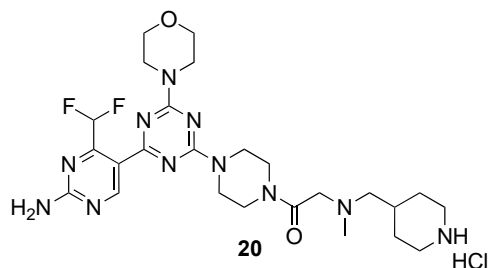

Compound **20** was prepared according to **GP2** from intermediate **19** (331 mg, 0.50 mmol, 1.0 equiv). Compound **20** was obtained as a colorless solid (229 mg, 0.38 mmol, 77%). **<sup>1</sup>H NMR** (400 MHz, DMSO-*d*<sub>6</sub>): δ 9.55 (br s, 1 H), 9.21 (s, 1 H), 9.15-8.87 (m, 2 H), 7.72 (t, *J* = 54.0 Hz, 1 H), 7.71 (br s, 1 H), 4.50-4.44 (m, 1 H), 4.24 (d, *J* = 7.0 Hz, 1 H), 4.02-3.47 (m, 14 H), 3.39-3.05 (m, 4 H), 3.01-2.87 (m, 4 H), 2.16 (s, 3 H), 1.94-1.77 (m, 2 H), 1.59-1.44 (m, 3 H) ppm. **<sup>19</sup>F{<sup>1</sup>H} NMR** (376 MHz, DMSO-*d*<sub>6</sub>): δ -120.66 (s, 2 F) ppm.

*tert*-butyl (2-(4-(4-(2-amino-4-(difluoromethyl)pyrimidin-5-yl)-6-morpholino-1,3,5-triazin-2-yl)piperazin-1-yl)ethyl)carbamate (**21**)

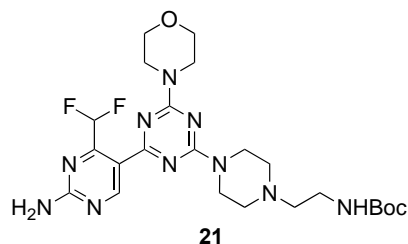

Compound **21** was prepared according to **GP3** from intermediate **15** (1.18 g, 3.00 mmol, 1 equiv.) and 2-(*boc*-amino)ethyl bromide (672 mg, 3.00 mmol, 1 equiv.). Purification by column chromatography on silica gel (DCM / methanol / ammonia: 100:0:0 → 97:3:0.03) gave compound **21** as a colorless solid (826 mg, 1.54 mmol, 51%). **<sup>1</sup>H NMR** (400 MHz, DMSO-*d*<sub>6</sub>): δ 9.10 (s, 1 H), 7.63 (t, *J* = 54.1 Hz, 1 H), 7.55 (br s, 2 H), 6.68 (t, *J* = 5.7 Hz, 1 H), 3.82-3.70 (m, 8 H), 3.67-3.59 (m, 4 H), 3.08 (q, *J* = 6.4 Hz, 2 H), 2.46-2.40 (m, 4 H), 2.37 (t, *J* = 6.8 Hz, 2 H), 1.38 (s, 9 H) ppm. **<sup>19</sup>F{<sup>1</sup>H} NMR** (376 MHz, DMSO-*d*<sub>6</sub>): δ -121.70 (s, 2 F) ppm. **<sup>13</sup>C{<sup>1</sup>H} NMR** (101 MHz, DMSO-*d*<sub>6</sub>): δ 167.81 (s, 1 C), 164.50 (s, 1 C), 164.26 (s, 1 C), 164.24 (s, 1 C), 162.17 (s, 1 C), 159.36 (t, *J* = 21.2 Hz, 1 C), 156.04 (s, 1 C), 118.10 (s, 1 C), 110.32 (t, *J* = 239.3 Hz, 1 C), 78.00 (s, 1 C), 66.41 (s, 2 C), 57.75 (s, 1 C), 52.90 (s, 2 C), 43.74-43.08 (m, 4 C), 37.79 (s, 1 C), 28.72 (s, 3 C) ppm. **MALDI-MS**: *m/z* = 481.542 [M – *tert*-butyl + H]<sup>+</sup>.

2-(4-(4-(2-amino-4-(difluoromethyl)pyrimidin-5-yl)-6-morpholino-1,3,5-triazin-2-yl)piperazin-1-yl)ethan-1-aminium chloride (**22**)

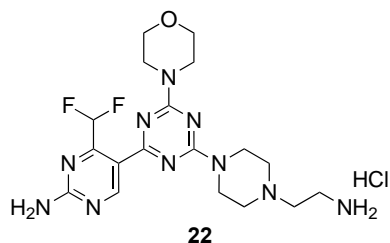

Compound **22** was prepared according to **GP2** from intermediate **21** (800 mg, 1.49 mmol, 1.0 equiv). Compound **22** was obtained as a colorless solid (705 mg, 1.49 mmol, quantitative yield). **<sup>1</sup>H NMR** (400 MHz, DMSO-*d*<sub>6</sub>): δ 9.14 (s, 1 H), 8.38 (br s, 3 H), 7.62 (t, *J* = 53.9 Hz, 1 H), 4.79 (br s, 1 H), 3.84-3.75 (m, 5 H), 3.70-3.61 (m, 7 H), 3.51-3.43 (m, 2 H), 3.39-3.31 (m, 4 H), 3.20-3.08 (s, 2 H) ppm. **<sup>19</sup>F{<sup>1</sup>H} NMR** (376 MHz, DMSO-*d*<sub>6</sub>): δ -120.68 (s, 2 F) ppm. **MALDI-MS**: *m/z* = 437.676 [M + H]<sup>+</sup>.

tert-butyl 4-((2-(4-(4-(2-amino-4-(difluoromethyl)pyrimidin-5-yl)-6-morpholino-1,3,5-triazin-2-yl)piperazin-1-yl)ethyl)carbamoyl)piperidine-1-carboxylate (**23**)

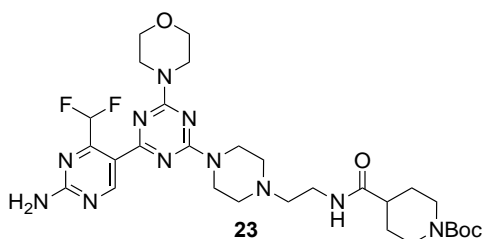

Compound **23** was prepared according to **GP1** from **22** (368 g, 0.78 mmol, 1.0 equiv). Purification by column chromatography on silica gel (DCM / methanol / ammonia: 100:0:0 → 96:4:0.04) gave compound **23** as a colorless solid (366 mg, 0.56 mmol, 72%). **<sup>1</sup>H NMR** (400 MHz, CDCl<sub>3</sub>): δ 9.23 (s, 1 H), 7.62 (t, *J* = 54.4 Hz, 1 H), 6.05 (br s, 1 H), 5.57 (br s, 2 H), 4.23-4.10 (m, 2 H), 3.95-3.79 (m, 8 H), 3.78-3.73 (m, 4 H), 3.40 (q, *J* = 5.6 Hz, 2 H), 2.76 (t, *J* = 12.7 Hz, 2 H), 2.57-2.47 (m, 6 H), 2.26 (tt, *J* = 11.6, 3.7 Hz, 1 H), 1.86-1.79 (m, 2 H), 1.70-1.57 (m, 2 H), 1.46 (s, 9 H) ppm. **<sup>19</sup>F{<sup>1</sup>H} NMR** (376 MHz, CDCl<sub>3</sub>): δ -121.70 (s, 2 F) ppm. **<sup>13</sup>C{<sup>1</sup>H} NMR** (101 MHz, CDCl<sub>3</sub>): δ 174.44 (s, 1 C), 167.65 (s, 1 C), 164.57 (s, 1 C), 164.33 (s, 1 C), 163.36 (s, 1 C), 162.47 (s, 1 C), 159.49 (t, *J* = 21.5 Hz, 1 C), 154.70 (s, 1 C), 119.88 (t, *J* = 3.8 Hz, 1 C), 109.48 (t, *J* = 240.8 Hz, 1 C), 79.65 (s, 1 C), 66.75 (s, 2 C), 56.66 (s, 1 C), 52.68 (s, 2 C), 43.66 (br s, 2 C), 43.30-42.84 (m, 4 C), 43.29 (s, 1 C), 35.78 (s, 1 C), 28.67 (s, 2 C), 28.44 (s, 3 C) ppm.

4-((2-(4-(4-(2-amino-4-(difluoromethyl)pyrimidin-5-yl)-6-morpholino-1,3,5-triazin-2-yl)piperazin-1-yl)ethyl)carbamoyl)piperidin-1-ium chloride (**24**).

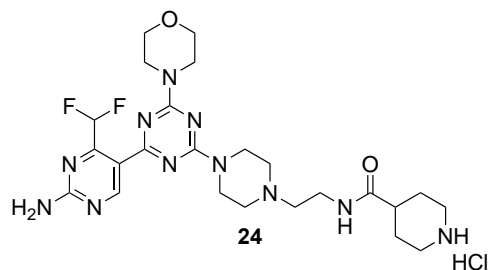

Compound **24** was prepared according to **GP2** from intermediate **23** (336 g, 0.52 mmol, 1.0 equiv). Compound **24** was obtained as a colorless solid (302 mg, 0.52 mmol, quantitative yield). **<sup>1</sup>H NMR** (400 MHz, DMSO-*d*<sub>6</sub>): δ 11.19 (br s, 1 H), 9.14 (s, 1 H), 8.90 (br s, 1 H), 8.66 (br s, 1 H), 8.39 (t, *J* = 5.7 Hz, 1 H), 7.62 (t, *J* = 53.9 Hz, 1 H), 7.61 (br s, 1 H), 4.81-4.69 (m, 2 H), 3.85-3.74 (m, 4 H), 3.70-3.58 (m, 5 H), 3.55-3.44 (m, 4 H), 3.30-3.23 (m, 2 H), 3.21-3.15 (m, 2 H), 3.13-3.02 (m, 2 H), 2.88 (q, *J* = 11.6 Hz, 2 H), 2.52-2.42 (m, 2 H), 1.95-1.87 (m, 2 H), 1.81-1.69 (m, 2 H) ppm. **<sup>19</sup>F{<sup>1</sup>H} NMR** (376 MHz, DMSO-*d*<sub>6</sub>): δ -120.68 (s, 2 F) ppm. **MALDI-MS**: *m/z* = 548.421 [M + H]<sup>+</sup>.

*tert*-butyl 4-(4-(4-(4-(2-amino-4-(difluoromethyl)pyrimidin-5-yl)-6-morpholino-1,3,5-triazin-2-yl)piperazine-1-carbonyl)benzyl)piperidine-1-carboxylate (**25**)

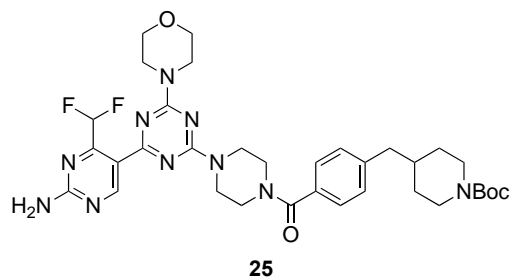

Compound **25** was prepared according to **GP1** from intermediate **15** (279 mg, 0.71 mmol, 1.0 equiv.) and 4-((1-(*tert*-butoxycarbonyl)piperidin-4-yl)methyl)benzoic acid (249 mg, 0.78 mmol, 1.1 equiv.). Purification by column chromatography on silica gel (DCM / methanol / ammonia: 100:0:0 → 97:3:0.03) gave compound **25** as a yellow solid (331 mg, 0.48 mmol, 67%). **<sup>1</sup>H NMR** (400 MHz, CDCl<sub>3</sub>): δ 9.22 (s, 1 H), 7.59 (t, *J* = 54.4 Hz, 1 H), 7.37 (d, *J* = 8.1 Hz, 2 H), 7.20 (d, *J* = 7.9 Hz, 2 H), 5.61 (s, 2 H), 4.18-4.01 (m, 2 H), 3.98-3.46 (m, 14 H), 2.64 (t, *J* = 12.8 Hz, 2 H), 2.58 (d, *J* = 7.0 Hz, 2 H), 1.74-1.55 (m, 5 H), 1.45 (s, 9 H), 1.23-1.10 (m, 2 H) ppm. **<sup>19</sup>F{<sup>1</sup>H} NMR** (376 MHz, CDCl<sub>3</sub>): δ -121.68 (s, 2 F) ppm. **<sup>13</sup>C{<sup>1</sup>H} NMR** (101 MHz, CDCl<sub>3</sub>): δ 170.75 (s, 1 C), 167.78 (s, 1 C), 164.56 (s, 1 C), 164.51 (s, 1 C), 163.41 (s, 1 C), 162.48 (s, 1 C), 159.50 (t, *J* = 21.4 Hz, 1 C), 154.84 (s, 1 C), 142.54 (s, 1 C), 133.03 (s, 1 C), 129.32 (s, 2 C), 127.23 (s, 2 C), 119.63 (t, *J* = 3.8 Hz, 1 C), 109.49 (t, *J* = 240.9 Hz, 1 C), 79.31 (s, 1 C),

66.71 (s, 2 C), 44.34-43.02 (s, 6 C), 42.95 (s, 2 C), 38.05 (s, 2 C), 31.91 (s, 2 C), 28.47 (s, 3 C) ppm. **MALDI-MS**:  $m/z = 639.769$  [ $M - \text{tert-butyl} + \text{H}$ ] $^+$ .

4-(4-(4-(4-(2-amino-4-(difluoromethyl)pyrimidin-5-yl)-6-morpholino-1,3,5-triazin-2-yl)piperazine-1-carbonyl)benzyl)piperidin-1-ium chloride (**26**)

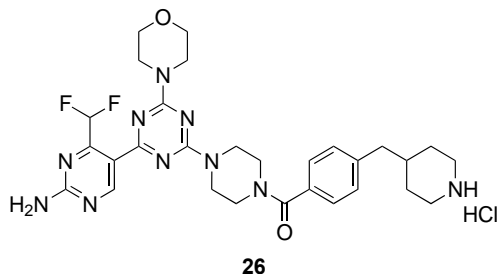

Compound **26** was prepared according to **GP2** from intermediate **25** (283 mg, 0.41 mmol, 1.0 equiv). Compound **26** was obtained as a colorless solid (185 mg, 0.29 mmol, 72%).  **$^1\text{H}$  NMR** (400 MHz,  $\text{DMSO-}d_6$ ):  $\delta$  9.11 (s, 1 H), 8.85 (br s, 1 H), 8.57 (br s, 1 H), 7.62 (t,  $J = 54.0$  Hz, 1 H), 7.41-7.34 (m, 2 H), 7.32-7.22 (m, 2 H), 3.94-3.75 (m, 8 H), 3.72-3.56 (m, 6 H), 3.41 (t,  $J = 6.4$  Hz, 1 H), 3.22 (d,  $J = 12.5$  Hz, 2 H), 2.79 (q,  $J = 11.5$  Hz, 2 H), 2.59 (d,  $J = 7.1$  Hz, 2 H), 1.89-1.78 (m, 1 H), 1.71 (d,  $J = 14.1$  Hz, 3 H), 1.36 (q,  $J = 12.1$  Hz, 2 H) ppm.  **$^{19}\text{F}\{^1\text{H}\}$  NMR** (376 MHz,  $\text{DMSO-}d_6$ ):  $\delta$  -120.67 (s, 2 F) ppm. **MALDI-MS**:  $m/z = 595.621$  [ $M + \text{H}$ ] $^+$ .

*tert*-butyl 3-(3-(4-(4-(2-amino-4-(difluoromethyl)pyrimidin-5-yl)-6-morpholino-1,3,5-triazin-2-yl)piperazine-1-carbonyl)benzyl)piperidine-1-carboxylate (**27**)

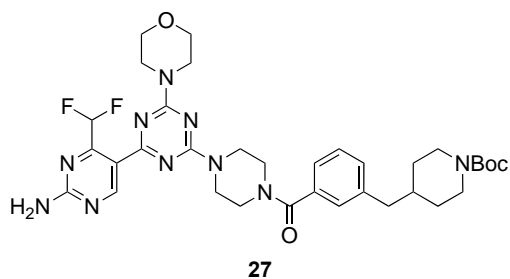

Compound **27** was prepared according to **GP1** from intermediate **15** (279 mg, 0.71 mmol, 1.0 equiv.) and 3-((1-(*tert*-butoxycarbonyl)piperidin-4-yl)methyl)benzoic acid (249 mg, 0.78 mmol, 1.1 equiv.). Purification by column chromatography on silica gel (DCM / methanol / ammonia: 100:0:0  $\rightarrow$  97:3:0.03) gave compound **27** as a light-yellow solid (318 mg, 0.46 mmol, 64%).  **$^1\text{H}$  NMR** (400 MHz,  $\text{CDCl}_3$ ):  $\delta$  9.20 (s, 1 H), 7.58 (t,  $J = 54.1$  Hz, 1 H), 7.36-7.30 (m, 1 H), 7.25-7.17 (m, 3 H), 5.98 (br s, 2 H), 4.16-3.98 (m, 2 H), 3.98-3.78 (m, 10 H), 3.78-3.71 (m, 4 H), 3.61-3.38 (m, 2 H), 2.71-2.50 (m, 4 H), 1.73-1.56 (m, 3 H), 1.43 (s, 9 H), 1.20-1.07 (m, 2 H) ppm.  **$^{19}\text{F}\{^1\text{H}\}$  NMR** (376 MHz,  $\text{CDCl}_3$ ):  $\delta$  -121.60 (s, 2 F) ppm.  **$^{13}\text{C}\{^1\text{H}\}$  NMR** (101 MHz,  $\text{CDCl}_3$ ):  $\delta$  170.86 (s, 1 C), 167.87 (s, 1 C), 164.64 (s, 1 C), 164.59 (s, 1 C), 163.49 (s, 1 C), 162.55 (s,



1 C), 159.58 (t,  $J = 21.7$  Hz, 1 C), 154.91 (s, 1 C), 141.01 (s, 1 C), 135.51 (s, 1 C), 130.85 (s, 1 C), 128.57 (s, 1 C), 127.80 (s, 1 C), 124.74 (s, 1 C), 119.66 (d,  $J = 3.8$  Hz, 1 C), 109.57 (t,  $J = 241.0$  Hz, 1 C), 79.38 (s, 1 C), 66.79 (s, 2 C), 44.36-43.00 (m, 6 C), 43.07 (s, 2 C), 38.08 (s, 2 C), 32.01 (s, 2 C), 28.53 (s, 3 C) ppm. **MALDI-MS**:  $m/z = 639.698$  [M – *tert*-butyl + H]<sup>+</sup>.

4-(3-(4-(4-(2-amino-4-(difluoromethyl)pyrimidin-5-yl)-6-morpholino-1,3,5-triazin-2-yl)piperazine-1-carbonyl)benzyl)piperidin-1-ium chloride (**28**)

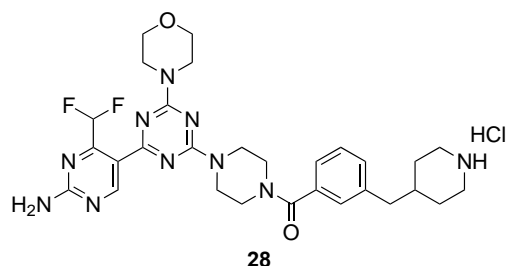

Compound **28** was prepared according to **GP2** from intermediate **27** (272 mg, 0.39 mmol, 1.0 equiv). Compound **28** was obtained as a light-yellow solid (156 mg, 0.25 mmol, 64%). **<sup>1</sup>H NMR** (400 MHz, DMSO-*d*<sub>6</sub>):  $\delta$  9.11 (s, 1 H), 8.93 (s, 1 H), 8.64 (s, 1 H), 7.62 (t,  $J = 54.2$  Hz, 1 H), 7.43-7.35 (m, 1 H), 7.34-7.19 (m, 3 H), 3.97-3.54 (m, 13 H), 3.50-3.31 (m, 2 H), 3.28-3.14 (m, 2 H), 2.78 (q,  $J = 11.7$  Hz, 2 H), 2.59 (d,  $J = 6.9$  Hz, 2 H), 1.89-1.76 (m, 1 H), 1.75-1.64 (m, 2 H), 1.45-1.25 (m, 2 H) ppm. **<sup>19</sup>F{<sup>1</sup>H} NMR** (376 MHz, DMSO-*d*<sub>6</sub>):  $\delta$  -120.69 (s, 2 F) ppm. **MALDI-MS**:  $m/z = 595.644$  [M + H]<sup>+</sup>.

*tert*-butyl 4-(4-(4-(4-(2-amino-4-(difluoromethyl)pyrimidin-5-yl)-6-morpholino-1,3,5-triazin-2-yl)piperazin-1-yl)-4-oxobutyl)piperidine-1-carboxylate (**29**)

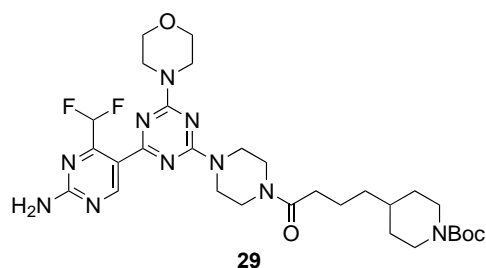

Compound **29** was prepared according to **GP1** from intermediate **15** (400 mg, 1.00 mmol, 1 equiv.) and 4-(1-(*tert*-butoxycarbonyl)piperidin-4-yl)butanoic acid (276 mg, 1.00 mmol, 1 equiv.). Purification by column chromatography on silica gel (DCM / methanol / ammonia: 100:0:0 → 97:3:0.03) gave compound **29** as a colorless solid (498 mg, 0.77 mmol, 77%). **<sup>1</sup>H NMR** (400 MHz, CDCl<sub>3</sub>):  $\delta$  9.22 (s, 1 H), 7.59 (t,  $J = 54.4$  Hz, 1 H), 5.94-5.78 (m, 2 H), 4.06 (s, 2 H), 3.90-3.79 (m, 8 H), 3.78-3.72 (m, 4 H), 3.71-3.61 (m, 2 H), 3.56-3.44 (m, 2 H), 2.66 (t,  $J = 12.8$  Hz, 2 H), 2.35 (t,  $J = 7.5$  Hz, 2 H), 1.84-1.74 (m, 1 H), 1.72-1.61 (m, 4 H), 1.44 (s, 9 H), 1.30 (dd,  $J = 10.1$ , 6.0 Hz, 2 H), 1.08 (qd,  $J = 12.1$ , 4.1 Hz, 2 H) ppm. **<sup>19</sup>F{<sup>1</sup>H} NMR** (376 MHz, DMSO-*d*<sub>6</sub>):  $\delta$  -121.59 (s, 2 F) ppm. **<sup>13</sup>C{<sup>1</sup>H} NMR** (101 MHz, CDCl<sub>3</sub>):  $\delta$  171.64 (s, 1 C), 171.57 (s, 1 C), 167.75 (s, 1

C), 164.52 (s, 1 C), 164.51 (s, 1 C), 163.43 (s, 1 C), 162.49 (s, 1 C), 159.50 (s, 1 C), 154.89 (s, 1 C), 119.63 (s, 1 C), 109.51 (t,  $J = 239.5$  Hz, 1 C), 79.20 (s, 1 C), 66.72 (s, 2 C), 45.29 (s, 1 C), 43.68 (s, 1 C), 41.27 (s, 1 C), 36.32 (s, 2 C), 35.98 (s, 2 C), 33.47 (s, 2 C), 32.12 (s, 2 C), 28.48 (s, 3 C), 22.34 (s, 2 C) ppm. **MALDI-MS**:  $m/z$  591.531  $[M - \text{tert-butyl} + H]^+$ .

4-(4-(4-(4-(2-amino-4-(difluoromethyl)pyrimidin-5-yl)-6-morpholino-1,3,5-triazin-2-yl)piperazin-1-yl)-4-oxobutyl)piperidin-1-ium chloride (**30**)

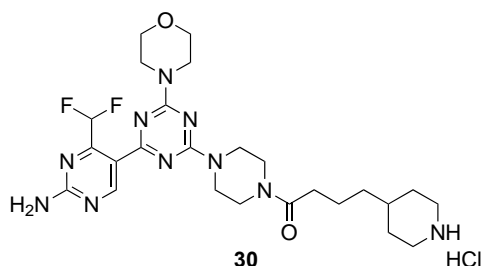

Compound **30** was prepared according to **GP2** from intermediate **29** (450 mg, 0.70 mmol, 1.0 equiv). Compound **30** was obtained as a colorless solid (390 mg, 0.67 mmol, 95%). **<sup>1</sup>H NMR** (400 MHz, DMSO- $d_6$ ):  $\delta$  9.10 (s, 1 H), 9.03 (d,  $J = 10.9$  Hz, 1 H), 8.79 (m, 1 H), 7.63 (t,  $J = 54.0$  Hz, 1 H), 3.76 (m, 8 H), 3.66-3.63 (m, 4 H), 3.54-3.46 (m, 4 H), 3.20 (d,  $J = 12.5$  Hz, 2 H), 2.79 (q,  $J = 11.9$  Hz, 2 H), 2.34 (t,  $J = 7.3$  Hz, 2 H), 1.78-1.74 (m, 2 H), 1.53-1.49 (m, 3 H), 1.39-1.19 (m, 4 H) ppm. **<sup>19</sup>F{<sup>1</sup>H} NMR** (376 MHz, DMSO- $d_6$ ):  $\delta$  -120.65 (d,  $J = 19.5$  Hz, 2 F) ppm. **MALDI-MS**:  $m/z = 547.516$   $[M + H]^+$ .

tert-butyl 4-((2-(tert-butoxy)-2-oxoethoxy)methyl)piperidine-1-carboxylate (**33**)

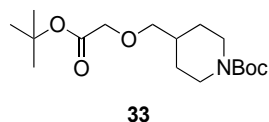

To a cold solution (0 °C) of *N*-boc-4-hydroxymethylpiperidine (**31**) (244 mg, 1.13 mmol, 1 equiv.) in dry DMF (3.5 mL) under inert atmosphere, NaH (60% dispersion in mineral oil, 95 mg, 2.38 mmol, 2.1 equiv.) was added portionwise. The resulting mixture was stirred for. Then *tert*-butyl bromoacetate (**32**) (449 mg, 2.30 mmol, 0.34 mL, 2 equiv.) was added and the mixture was stirred at 0 °C for 15 min. After reaction completion monitored by TLC, distilled H<sub>2</sub>O was added to quench the reaction and the product was extracted with EtOAc. The organic layer was washed with brine (2x), dried over Na<sub>2</sub>SO<sub>4</sub> and concentrated under reduced pressure. Purification by column chromatography on silica gel (cyclohexane / ethyl acetate: 100:0 → 80:20) gave compound **33** as a colorless oil (99 mg, 0.30 mmol, 27%). **<sup>1</sup>H NMR** (400 MHz, CDCl<sub>3</sub>):  $\delta$  4.17-4.01 (m, 2 H), 3.93 (s, 2 H), 3.35 (d,  $J = 6.2$  Hz, 2 H), 2.69 (t,  $J = 12.2$  Hz, 2 H), 1.85-1.68 (m, 3 H), 1.47 (s, 9 H), 1.44 (s, 9 H), 1.15 (td,  $J = 12.1, 4.4$  Hz, 2 H) ppm.

2-((1-(*tert*-butoxycarbonyl)piperidin-4-yl)methoxy)acetic acid (**34**).

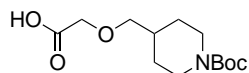

**34**

To a cold solution (0 °C) of **33** (1.26 g, 3.84 mmol, 1.0 equiv.) in THF (20 mL), a LiOH aqueous solution (5M, 20 mL, 25 equiv.) was added. The resulting mixture was stirred for 5 h at 60°C. After reaction completion monitored by TLC, the solvent was removed under pressure and the aqueous phase was washed with EtOAc. The aqueous phase was collected and acidified to pH 1 with HCl 1 M and extracted with EtOAc (3x). The organic layer was washed with brine (2x), dried over Na<sub>2</sub>SO<sub>4</sub> and concentrated under reduced pressure, giving compound **34** as a colorless solid (478 mg, 1.75 mmol, 46%). **<sup>1</sup>H NMR** (400 MHz, CDCl<sub>3</sub>): δ 4.11 (s, 4 H), 3.41 (d, *J* = 6.4 Hz, 2 H), 2.71 (t, *J* = 12.8 Hz, 2 H), 1.86-1.77 (m, 1 H), 1.77-1.70 (m, 2 H), 1.45 (s, 9 H), 1.17 (qd, *J* = 12.5, 4.4 Hz, 2 H) ppm.

*tert*-butyl 4-((2-(4-(4-(2-amino-4-(difluoromethyl)pyrimidin-5-yl)-6-morpholino-1,3,5-triazin-2-yl)piperazin-1-yl)-2-oxoethoxy)methyl)piperidine-1-carboxylate (**35**)

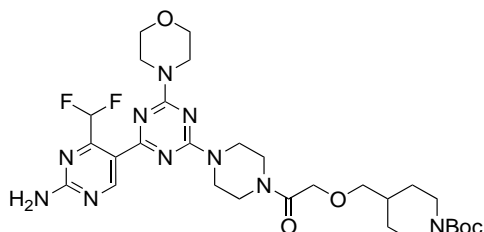

**35**

Compound **35** was prepared according to **GP1** from intermediate **15** (310 mg, 0.80 mmol, 1.0 equiv.) and **34** (234 mg, 0.14 mmol, 1.1 equiv.). Purification by column chromatography on silica gel (DCM / methanol / ammonia: 100:0:0 → 97:3:0.03) gave compound **35** as a light-yellow solid (89 mg, 0.48 mmol, 17%). **<sup>1</sup>H NMR** (400 MHz, CDCl<sub>3</sub>): δ 9.21 (s, 1 H), 7.59 (t, *J* = 54.4 Hz, 1 H), 5.96 (s, 2 H), 4.17 (s, 2 H), 4.14-4.02 (m, 2 H), 3.94-3.80 (m, 8 H), 3.78-3.71 (m, 4 H), 3.70-3.64 (m, 2 H), 3.63-3.56 (m, 2 H), 3.36 (d, *J* = 6.4 Hz, 2 H), 2.69 (t, *J* = 12.1 Hz, 2 H), 1.82-1.75 (m, 1 H), 1.74-1.65 (m, 2 H), 1.43 (s, 9 H), 1.15 (td, *J* = 12.2, 4.0 Hz, 2 H) ppm. **<sup>19</sup>F{<sup>1</sup>H} NMR** (376 MHz, CDCl<sub>3</sub>): δ -121.65 (s, 2 F) ppm. **<sup>13</sup>C{<sup>1</sup>H} NMR** (101 MHz, CDCl<sub>3</sub>): δ 181.89 (s, 1 C), 168.13 (s, 1 C), 167.87 (s, 1 C), 164.61 (s, 1 C), 164.60 (s, 1 C), 163.50 (s, 1 C), 162.56 (s, 1 C), 154.91 (s, 1 C), 119.72 (s, 1 C), 109.69 (t, *J* = 241.3 Hz, 1 C), 79.45 (s, 1 C), 71.03 (s, 1 C), 66.80 (s, 2 C), 45.07 (s, 2 C), 43.89-42.94 (m, 4 C), 41.69 (m, 2 C), 36.56 (s, 2 C), 29.03 (s, 2 C), 28.53 (s, 3 C) ppm. **MALDI-MS**: *m/z* = 549.981 [M – Boc + H]<sup>+</sup>.

4-((2-(4-(4-(2-amino-4-(difluoromethyl)pyrimidin-5-yl)-6-morpholino-1,3,5-triazin-2-yl)piperazin-1-yl)-2-oxoethoxy)methyl)piperidin-1-ium chloride (**36**)

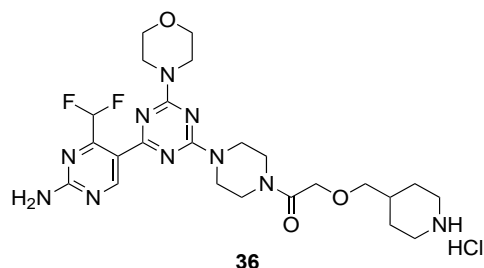

Compound **36** was prepared according to **GP2** from intermediate **35** (641 mg, 0.99 mmol, 1.0 equiv). Compound **36** was obtained as a colorless solid (653 mg, 1.12 mmol, quantitative yield). <sup>1</sup>H NMR (400 MHz, DMSO-*d*<sub>6</sub>): δ 9.11 (s, 1 H), 8.81 (br s, 1 H), 8.50 (br s, 1 H), 7.63 (t, *J* = 54.0 Hz, 1 H), 4.19 (s, 2 H), 3.87-3.72 (m, 8 H), 3.69-3.61 (m, 4 H), 3.54-3.45 (m, 4 H), 3.41 (t, *J* = 6.4 Hz, 1 H), 3.32 (d, *J* = 5.9 Hz, 2 H), 3.24 (d, *J* = 12.5 Hz, 2 H), 2.84 (q, *J* = 11.8 Hz, 2 H), 1.84-1.77 (m, 3 H), 1.45-1.32 (m, 2 H) ppm. <sup>19</sup>F{<sup>1</sup>H} NMR (376 MHz, DMSO-*d*<sub>6</sub>): δ -120.62 (s, 2 F) ppm. MALDI-MS: *m/z* = 549.739 [M + H]<sup>+</sup>.

*tert*-butyl (S)-4-((2-(4-(4-(2-amino-4-(difluoromethyl)pyrimidin-5-yl)-6-(3-methylmorpholino)-1,3,5-triazin-2-yl)piperazin-1-yl)-2-oxoethoxy)methyl)piperidine-1-carboxylate (**37**)

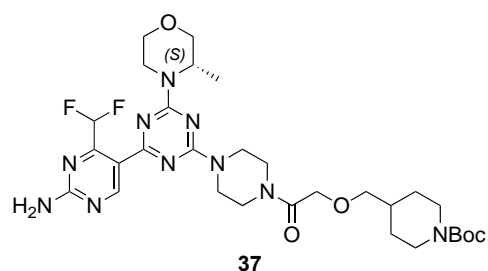

Compound **37** was prepared according to **GP1** from intermediate **16** (599 mg, 1.47 mmol, 1 equiv.) and **34** (444 mg, 1.62 mmol, 1 equiv.). Purification by column chromatography on silica gel (DCM / methanol / ammonia: 100:0:0 → 97:3:0.03) gave compound **37** as a colorless solid (413 mg, 0.62 mmol, 42%). <sup>1</sup>H NMR (400 MHz, CDCl<sub>3</sub>): δ 9.24 (s, 1 H), 7.61 (t, *J* = 54.4 Hz, 1 H), 5.58 (s, 2 H), 4.74 (s, 1 H), 4.40 (d, *J* = 13.6 Hz, 1 H), 4.18 (br s, 2 H), 4.12 (br s, 1 H), 3.99 (dd, *J* = 11.5, 3.7 Hz, 1 H), 3.94-3.76 (m, 5 H), 3.68 (dd, *J* = 11.3, 3.4 Hz, 3 H), 3.64-3.47 (m, 4 H), 3.37 (d, *J* = 6.3 Hz, 2 H), 3.29 (t, *J* = 12.8 Hz, 1 H), 2.70 (t, *J* = 13.0 Hz, 2 H), 1.84-1.75 (m, 1 H), 1.71 (d, *J* = 13.4 Hz, 2 H), 1.45 (s, 9 H), 1.33 (d, *J* = 6.8 Hz, 3 H), 1.16 (qd, *J* = 12.5, 4.2 Hz, 2 H) ppm. <sup>19</sup>F{<sup>1</sup>H} NMR (376 MHz, CDCl<sub>3</sub>): δ -121.74 (s, 2 F) ppm. <sup>13</sup>C{<sup>1</sup>H} NMR (101 MHz, CDCl<sub>3</sub>): δ 168.27 (s, 1 C), 167.98 (s, 1 C), 164.78 (s, 1 C), 164.41 (s, 1 C), 163.61 (s, 1 C), 162.73 (s, 1 C), 160.32-159.34 (m, 1 C), 155.05 (s, 1 C), 119.92 (s, 1 C), 109.74 (t, *J* = 241.0 Hz, 1 C), 79.59 (s, 1 C), 76.41 (s, 1 C), 71.20 (s, 2 C), 67.14 (s, 1 C), 46.75 (s, 1 C), 45.20 (s, 1 C), 43.68 (s, 3 C), 41.83 (s, 1 C), 38.86 (s, 1 C), 36.70 (s, 1 C),

29.91 (s, 1 C), 29.17 (s, 2 C), 28.67 (s, 3 C), 14.56 (s, 1 C) ppm. **MALDI-MS**:  $m/z = 663.613$   $[M + H]^+$ .

(S)-4-((2-(4-(4-(2-amino-4-(difluoromethyl)pyrimidin-5-yl)-6-(3-methylmorpholino)-1,3,5-triazin-2-yl)piperazin-1-yl)-2-oxoethoxy)methyl)piperidin-1-ium chloride (**38**)

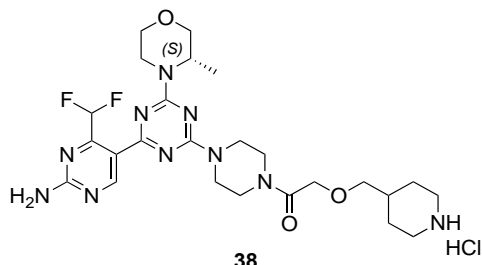

Compound **38** was prepared according to **GP2** from intermediate **37** (373 mg, 0.56 mmol, 1.0 equiv). Compound **38** was obtained as a light-yellow solid (404 mg, 0.67 mmol, quantitative yield).  $^1\text{H NMR}$  (400 MHz,  $\text{DMSO-}d_6$ ):  $\delta$  9.11 (s, 1 H), 8.91 (s, 1 H), 8.60 (s, 1 H), 7.64 (t,  $J = 54.1$  Hz, 1 H), 4.33 (d,  $J = 13.6$  Hz, 1 H), 4.18 (s, 2 H), 3.97-3.89 (m, 1 H), 3.87-3.69 (m, 5 H), 3.65 (td,  $J = 6.7, 6.3, 5.2$  Hz, 1 H), 3.53 (d,  $J = 9.6$  Hz, 4 H), 3.41 (t,  $J = 6.4$  Hz, 1 H), 3.32 (d,  $J = 6.0$  Hz, 2 H), 3.26-3.14 (m, 3 H), 2.83 (q,  $J = 11.9$  Hz, 2 H), 1.88-1.72 (m, 4 H), 1.39 (q,  $J = 11.9, 11.4$  Hz, 2 H), 1.23 (d,  $J = 6.8$  Hz, 3 H) ppm.  $^{19}\text{F}\{^1\text{H}\}$  NMR (376 MHz,  $\text{DMSO-}d_6$ ):  $\delta$  -120.65 (s, 2 F) ppm. **MALDI-MS**:  $m/z = 563.709$   $[M + H]^+$ .

*tert*-Butyl *N*-[5-bromo-4-(difluoromethyl)pyrimidin-2-yl]-*N*-[(*tert*-butoxy)carbonyl]carbamate (**39**).

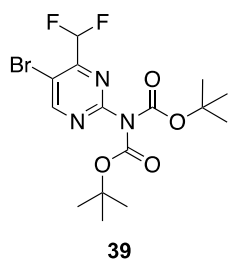

Compound **39** was prepared according to the literature.<sup>16</sup>

## References

- (1) Borsari, C., Keles, E., McPhail, J. A., Schaefer, A., Sriramaratnam, R., Goch, W., Schaefer, T., De Pascale, M., Bal, W., Gstaiger, M., Burke, J. E., Wymann, M. P. Covalent Proximity Scanning of a Distal Cysteine to Target PI3K $\alpha$ . *J Am Chem Soc* **2022**, *144*, 6326-6342. <https://DOI.org/10.1021/jacs.1c13568>
- (2) Borsari, C., Rageot, D., Beaufils, F., Bohnacker, T., Keles, E., Buslov, I., Melone, A., Sele, A. M., Hebeisen, P., Fabbro, D., Hillmann, P., Wymann, M. P. Preclinical Development of PQR514, a Highly Potent PI3K Inhibitor Bearing a Difluoromethyl-Pyrimidine Moiety. *ACS Med Chem Lett* **2019**, *10*, 1473-1479. <https://DOI.org/10.1021/acsmchemlett.9b00333>
- (3) Beaufils, F., Cmiljanovic, N., Cmiljanovic, V., Bohnacker, T., Melone, A., Marone, R., Jackson, E., Zhang, X., Sele, A., Borsari, C., Mestan, J., Hebeisen, P., Hillmann, P., Giese, B., Zvelebil, M., Fabbro, D., Williams, R. L., Rageot, D., Wymann, M. P. 5-(4,6-Dimorpholino-1,3,5-triazin-2-yl)-4-(trifluoromethyl)pyridin-2-amine (PQR309), a Potent, Brain-Penetrant, Orally Bioavailable, Pan-Class I PI3K/mTOR Inhibitor as Clinical Candidate in Oncology. *J Med Chem* **2017**, *60*, 7524-7538. <https://DOI.org/10.1021/acs.jmedchem.7b00930>
- (4) Rossi Sebastiano, M., Doak, B. C., Backlund, M., Poongavanam, V., Over, B., Ermondi, G., Caron, G., Matsson, P., Kihlberg, J. Impact of Dynamically Exposed Polarity on Permeability and Solubility of Chameleonic Drugs Beyond the Rule of 5. *Journal of Medicinal Chemistry* **2018**, *61*, 4189-4202. <https://DOI.org/10.1021/acs.jmedchem.8b00347>
- (5) Johnson, K. A. Fitting enzyme kinetic data with KinTek Global Kinetic Explorer. *Methods Enzymol* **2009**, *467*, 601-626. [https://DOI.org/10.1016/S0076-6879\(09\)67023-3](https://DOI.org/10.1016/S0076-6879(09)67023-3)
- (6) Johnson, K. A., Simpson, Z. B., Blom, T. Global kinetic explorer: a new computer program for dynamic simulation and fitting of kinetic data. *Anal Biochem* **2009**, *387*, 20-29. <https://DOI.org/10.1016/j.ab.2008.12.024>
- (7) Montero, D., Tachibana, C., Rahr Winther, J., Appenzeller-Herzog, C. Intracellular glutathione pools are heterogeneously concentrated. *Redox Biol* **2013**, *1*, 508-513. <https://DOI.org/10.1016/j.redox.2013.10.005>
- (8) Geremia, S., Campagnolo, M., Demitri, N., Johnson, L. N. Simulation of diffusion time of small molecules in protein crystals. *Structure* **2006**, *14*, 393-400. <https://DOI.org/10.1016/j.str.2005.12.007>
- (9) Zhao, W., Tian, Y., Cai, M., Wang, F., Wu, J., Gao, J., Liu, S., Jiang, J., Jiang, S., Wang, H. Studying the nucleated mammalian cell membrane by single molecule approaches. *PLoS One* **2014**, *9*, e91595. <https://DOI.org/10.1371/journal.pone.0091595>
- (10) Shen, T., Shirinzadeh, B., Zhong, Y., Smith, J., Pinski, J., Ghafarian, M. Sensing and Modelling Mechanical Response in Large Deformation Indentation of Adherent Cell Using Atomic Force Microscopy. *Sensors (Basel)* **2020**, *20*, 1764. <https://DOI.org/10.3390/s20061764>
- (11) Gross, S. M., Rotwein, P. Akt signaling dynamics in individual cells. *J Cell Sci* **2015**, *128*, 2509-2519. <https://DOI.org/10.1242/jcs.168773>
- (12) McQuin, C., Goodman, A., Chernyshev, V., Kamentsky, L., Cimini, B. A., Karhohs, K. W., Doan, M., Ding, L., Rafelski, S. M., Thirstrup, D., Wiegand, W., Singh, S., Becker, T., Caicedo, J. C.,

- Carpenter, A. E. CellProfiler 3.0: Next-generation image processing for biology. *PLoS Biol* **2018**, *16*, e2005970. <https://DOI.org/10.1371/journal.pbio.2005970>
- (13) Hafner, M., Niepel, M., Chung, M., Sorger, P. K. Growth rate inhibition metrics correct for confounders in measuring sensitivity to cancer drugs. *Nat Methods* **2016**, *13*, 521-527. <https://DOI.org/10.1038/nmeth.3853>
- (14) Klippel, A., Escobedo, J. A., Hirano, M., Williams, L. T. The interaction of small domains between the subunits of phosphatidylinositol 3-kinase determines enzyme activity. *Mol Cell Biol* **1994**, *14*, 2675-2685. <https://DOI.org/10.1128/mcb.14.4.2675>
- (15) Bohnacker, T., Prota, A. E., Beaufils, F., Burke, J. E., Melone, A., Inglis, A. J., Rageot, D., Sele, A. M., Cmiljanovic, V., Cmiljanovic, N., Bargsten, K., Aher, A., Akhmanova, A., Díaz, J. F., Fabbro, D., Zvelebil, M., Williams, R. L., Steinmetz, M. O., Wymann, M. P. Deconvolution of Buparlisib's mechanism of action defines specific PI3K and tubulin inhibitors for therapeutic intervention. *Nat Commun* **2017**, *8*, 14683. <https://DOI.org/10.1038/ncomms14683>
- (16) Rageot, D., Bohnacker, T., Keles, E., McPhail, J. A., Hoffmann, R. M., Melone, A., Borsari, C., Sriramaratnam, R., Sele, A. M., Beaufils, F., Hebeisen, P., Fabbro, D., Hillmann, P., Burke, J. E., Wymann, M. P. (S)-4-(Difluoromethyl)-5-(4-(3-methylmorpholino)-6-morpholino-1,3,5-triazin-2-yl)pyridin-2-amine (PQR530), a Potent, Orally Bioavailable, and Brain-Penetrable Dual Inhibitor of Class I PI3K and mTOR Kinase. *J Med Chem* **2019**, *62*, 6241-6261. <https://DOI.org/10.1021/acs.jmedchem.9b00525>

## Synthetic Schemes and Spectroscopic/Analytic Data, Table of Contents

### Spectra by Type

|                                                          |     |
|----------------------------------------------------------|-----|
| <sup>1</sup> H-NMR spectra .....                         | 75  |
| <sup>13</sup> C-NMR spectra.....                         | 93  |
| MS data.....                                             | 105 |
| HPLC data.....                                           | 119 |
| MALD-MS spectra of β-mercaptoethanol (β-ME) adducts..... | 125 |

### Figures of Spectra

|                                                                                               |    |
|-----------------------------------------------------------------------------------------------|----|
| Figure S12. <sup>1</sup> H-NMR of compound 3 (400 MHz) in CDCl <sub>3</sub> .....             | 75 |
| Figure S13. <sup>1</sup> H-NMR of compound 4 (400 MHz) in CDCl <sub>3</sub> .....             | 76 |
| Figure S14. <sup>1</sup> H-NMR of compound 5 (400 MHz) in CDCl <sub>3</sub> .....             | 76 |
| Figure S15. <sup>1</sup> H-NMR of compound 6 (400 MHz) in CDCl <sub>3</sub> .....             | 77 |
| Figure S16. <sup>1</sup> H-NMR of compound 7 (400 MHz) in CDCl <sub>3</sub> .....             | 78 |
| Figure S17. <sup>1</sup> H-NMR of compound 7r (400 MHz) in CDCl <sub>3</sub> . ....           | 78 |
| Figure S18. <sup>1</sup> H-NMR of compound 8 (400 MHz) in CDCl <sub>3</sub> .....             | 79 |
| Figure S19. <sup>1</sup> H-NMR of compound 9 (400 MHz) in CDCl <sub>3</sub> .....             | 79 |
| Figure S20. <sup>1</sup> H-NMR of compound 9r (400 MHz) in CDCl <sub>3</sub> . ....           | 80 |
| Figure S21. <sup>1</sup> H-NMR of compound 13 (400 MHz) in CDCl <sub>3</sub> .....            | 80 |
| Figure S22. <sup>1</sup> H-NMR of compound 14 (400 MHz) in CDCl <sub>3</sub> .....            | 81 |
| Figure S23. <sup>1</sup> H-NMR of compound 15 (400 MHz) in DMSO- <i>d</i> <sub>6</sub> . .... | 81 |
| Figure S24. <sup>1</sup> H-NMR of compound 16 (400 MHz) in CDCl <sub>3</sub> .....            | 82 |
| Figure S25. <sup>1</sup> H-NMR of compound 17 (400 MHz) in CDCl <sub>3</sub> .....            | 82 |
| Figure S26. <sup>1</sup> H-NMR of compound 18 (400 MHz) in DMSO- <i>d</i> <sub>6</sub> . .... | 83 |
| Figure S27. <sup>1</sup> H-NMR of compound 19 (400 MHz) in CDCl <sub>3</sub> .....            | 83 |
| Figure S28. <sup>1</sup> H-NMR of compound 20 (400 MHz) in DMSO- <i>d</i> <sub>6</sub> . .... | 84 |
| Figure S29. <sup>1</sup> H-NMR of compound 21 (400 MHz) in DMSO- <i>d</i> <sub>6</sub> . .... | 84 |
| Figure S30. <sup>1</sup> H-NMR of compound 22 (400 MHz) in DMSO- <i>d</i> <sub>6</sub> . .... | 85 |
| Figure S31. <sup>1</sup> H-NMR of compound 23 (400 MHz) in CDCl <sub>3</sub> .....            | 85 |
| Figure S32. <sup>1</sup> H-NMR of compound 24 (400 MHz) in DMSO- <i>d</i> <sub>6</sub> . .... | 86 |
| Figure S33. <sup>1</sup> H-NMR of compound 25 (400 MHz) in CDCl <sub>3</sub> .....            | 86 |
| Figure S34. <sup>1</sup> H-NMR of compound 26 (400 MHz) in DMSO- <i>d</i> <sub>6</sub> . .... | 87 |
| Figure S35. <sup>1</sup> H-NMR of compound 27 (400 MHz) in CDCl <sub>3</sub> .....            | 87 |
| Figure S36. <sup>1</sup> H-NMR of compound 28 (400 MHz) in DMSO- <i>d</i> <sub>6</sub> . .... | 88 |
| Figure S37. <sup>1</sup> H-NMR of compound 29 (400 MHz) in CDCl <sub>3</sub> .....            | 88 |



|                                                                                 |     |
|---------------------------------------------------------------------------------|-----|
| Figure S38. $^1\text{H-NMR}$ of compound 30 (400 MHz) in $\text{DMSO-}d_6$ .    | 89  |
| Figure S39. $^1\text{H-NMR}$ of compound 33 (400 MHz) in $\text{CDCl}_3$ .      | 89  |
| Figure S40. $^1\text{H-NMR}$ of compound 34 (400 MHz) in $\text{CDCl}_3$ .      | 90  |
| Figure S41. $^1\text{H-NMR}$ of compound 35 (400 MHz) in $\text{CDCl}_3$ .      | 90  |
| Figure S42. $^1\text{H-NMR}$ of compound 36 (400 MHz) in $\text{DMSO-}d_6$ .    | 91  |
| Figure S43. $^1\text{H-NMR}$ of compound 37 (400 MHz) in $\text{CDCl}_3$ .      | 91  |
| Figure S44. $^1\text{H-NMR}$ of compound 38 (400 MHz) in $\text{DMSO-}d_6$ .    | 92  |
| Figure S45. $^{13}\text{C-NMR}$ of compound 3 (101 MHz) in $\text{CDCl}_3$ .    | 93  |
| Figure S46. $^{13}\text{C-NMR}$ of compound 4 (101 MHz) in $\text{CDCl}_3$ .    | 94  |
| Figure S47. $^{13}\text{C-NMR}$ of compound 5 (101 MHz) in $\text{CDCl}_3$ .    | 94  |
| Figure S48. $^{13}\text{C-NMR}$ of compound 6 (101 MHz) in $\text{CDCl}_3$ .    | 95  |
| Figure S49. $^{13}\text{C-NMR}$ of compound 7 (101 MHz) in $\text{CDCl}_3$ .    | 96  |
| Figure S50. $^{13}\text{C-NMR}$ of compound 7r (101 MHz) in $\text{CDCl}_3$ .   | 96  |
| Figure S51. $^{13}\text{C-NMR}$ of compound 8 (101 MHz) in $\text{CDCl}_3$ .    | 97  |
| Figure S52. $^{13}\text{C-NMR}$ of compound 9 (101 MHz) in $\text{CDCl}_3$ .    | 97  |
| Figure S53. $^{13}\text{C-NMR}$ of compound 9r (101 MHz) in $\text{CDCl}_3$ .   | 98  |
| Figure S54. $^{13}\text{C-NMR}$ of compound 13 (101 MHz) in $\text{CDCl}_3$ .   | 98  |
| Figure S55. $^{13}\text{C-NMR}$ of compound 14 (101 MHz) in $\text{CDCl}_3$ .   | 99  |
| Figure S56. $^{13}\text{C-NMR}$ of compound 15 (101 MHz) in $\text{DMSO-}d_6$ . | 99  |
| Figure S57. $^{13}\text{C-NMR}$ of compound 16 (101 MHz) in $\text{CDCl}_3$ .   | 100 |
| Figure S58. $^{13}\text{C-NMR}$ of compound 17 (101 MHz) in $\text{CDCl}_3$ .   | 100 |
| Figure S59. $^{13}\text{C-NMR}$ of compound 19 (101 MHz) in $\text{CDCl}_3$ .   | 101 |
| Figure S60. $^{13}\text{C-NMR}$ of compound 21 (101 MHz) in $\text{CDCl}_3$ .   | 101 |
| Figure S61. $^{13}\text{C-NMR}$ of compound 23 (101 MHz) in $\text{CDCl}_3$ .   | 102 |
| Figure S62. $^{13}\text{C-NMR}$ of compound 25 (101 MHz) in $\text{CDCl}_3$ .   | 102 |
| Figure S63. $^{13}\text{C-NMR}$ of compound 27 (101 MHz) in $\text{CDCl}_3$ .   | 103 |
| Figure S64. $^{13}\text{C-NMR}$ of compound 29 (101 MHz) in $\text{CDCl}_3$ .   | 103 |
| Figure S65. $^{13}\text{C-NMR}$ of compound 35 (101 MHz) in $\text{CDCl}_3$ .   | 104 |
| Figure S66. $^{13}\text{C-NMR}$ of compound 37 (101 MHz) in $\text{CDCl}_3$ .   | 104 |
| Figure S67. HRMS of compound 3.                                                 | 105 |
| Figure S68. HRMS of compound 4.                                                 | 105 |
| Figure S69. HRMS of compound 5.                                                 | 105 |
| Figure S70. HRMS of compound 6.                                                 | 106 |
| Figure S71. HRMS of compound 7.                                                 | 106 |
| Figure S72. HRMS of compound 7r.                                                | 106 |
| Figure S73. HRMS of compound 8.                                                 | 107 |
| Figure S74. HRMS of compound 9.                                                 | 107 |

|                                                                 |     |
|-----------------------------------------------------------------|-----|
| Figure S75. HRMS of compound 9r. ....                           | 108 |
| Figure S76. MALDI-MS of compound 13. ....                       | 108 |
| Figure S77. MALDI-MS of compound 14. ....                       | 109 |
| Figure S78. MALDI-MS of compound 15. ....                       | 109 |
| Figure S79. MALDI-MS of compound 16. ....                       | 110 |
| Figure S80. MALDI-MS of compound 17. ....                       | 110 |
| Figure S81. MALDI-MS of compound 18. ....                       | 111 |
| Figure S82. MALDI-MS of compound 19. ....                       | 111 |
| Figure S83. MALDI-MS of compound 21. ....                       | 112 |
| Figure S84. MALDI-MS of compound 22. ....                       | 112 |
| Figure S85. MALDI-MS of compound 24. ....                       | 113 |
| Figure S86. MALDI-MS of compound 25. ....                       | 113 |
| Figure S87. MALDI-MS of compound 26. ....                       | 114 |
| Figure S88. MALDI-MS of compound 27. ....                       | 114 |
| Figure S89. MALDI-MS of compound 28. ....                       | 115 |
| Figure S90. MALDI-MS of compound 29. ....                       | 115 |
| Figure S91. MALDI-MS of compound 30. ....                       | 116 |
| Figure S92. MALDI-MS of compound 35. ....                       | 116 |
| Figure S93. MALDI-MS of compound 36. ....                       | 117 |
| Figure S94. MALDI-MS of compound 37. ....                       | 117 |
| Figure S95. MALDI-MS of compound 38. ....                       | 118 |
| Figure S96. HPLC chromatogram of compound 3. ....               | 119 |
| Figure S97. HPLC chromatogram of compound 4. ....               | 120 |
| Figure S98. HPLC chromatogram of compound 5. ....               | 120 |
| Figure S99. HPLC chromatogram of compound 6. ....               | 121 |
| Figure S100. HPLC chromatogram of compound 7. ....              | 121 |
| Figure S101. HPLC chromatogram of compound 7r. ....             | 122 |
| Figure S102. HPLC chromatogram of compound 8. ....              | 123 |
| Figure S103. HPLC chromatogram of compound 9. ....              | 123 |
| Figure S104. HPLC chromatogram of compound 9r. ....             | 124 |
| Figure S105. MALDI-MS of $\beta$ -ME adduct of compound 3. .... | 125 |
| Figure S106. MALDI-MS of $\beta$ -ME adduct of compound 5. .... | 125 |
| Figure S107. MALDI-MS of $\beta$ -ME adduct of compound 5. .... | 126 |
| Figure S108. MALDI-MS of $\beta$ -ME adduct of compound 7. .... | 126 |
| Figure S109. MALDI-MS of $\beta$ -ME adduct of compound 8. .... | 127 |
| Figure S110. MALDI-MS of $\beta$ -ME adduct of compound 9. .... | 127 |

# <sup>1</sup>H-NMR spectra

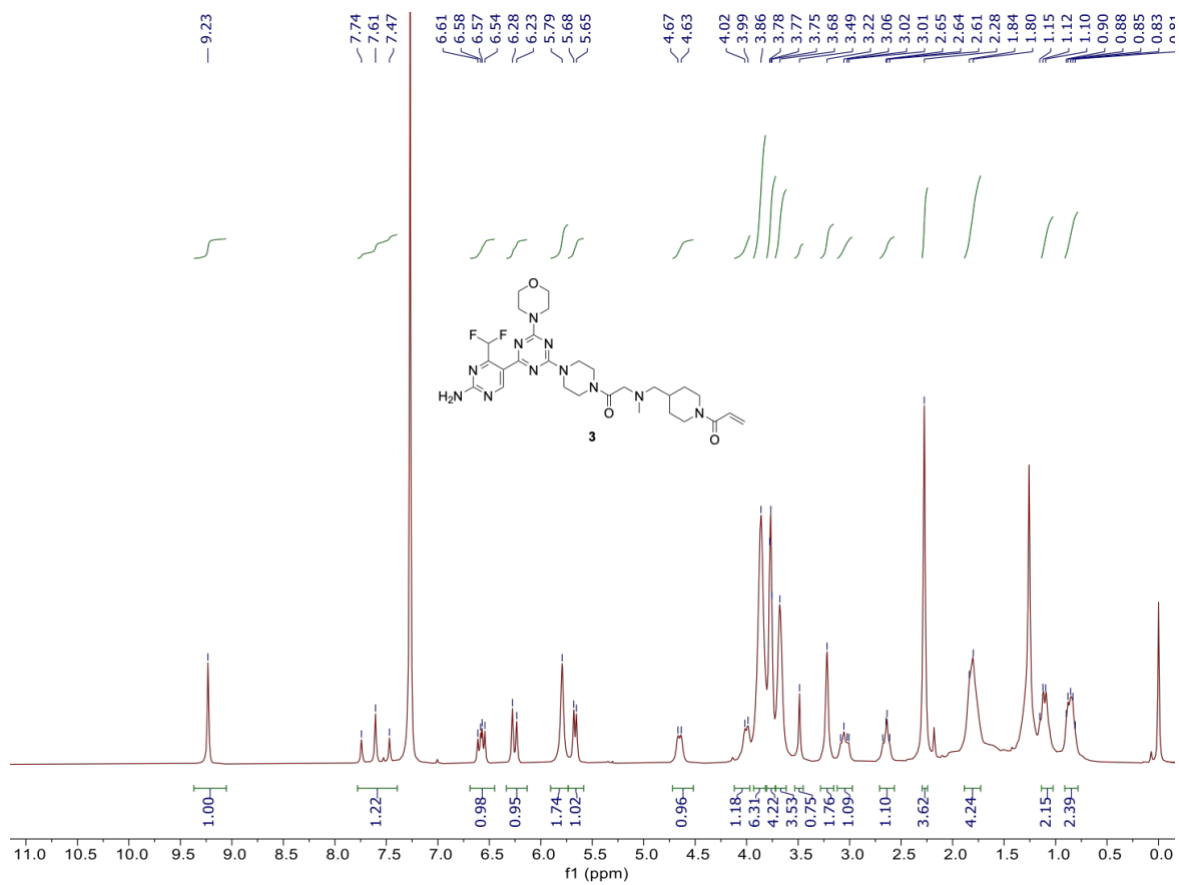

**Figure S12.** <sup>1</sup>H-NMR of compound 3 (400 MHz) in CDCl<sub>3</sub>.

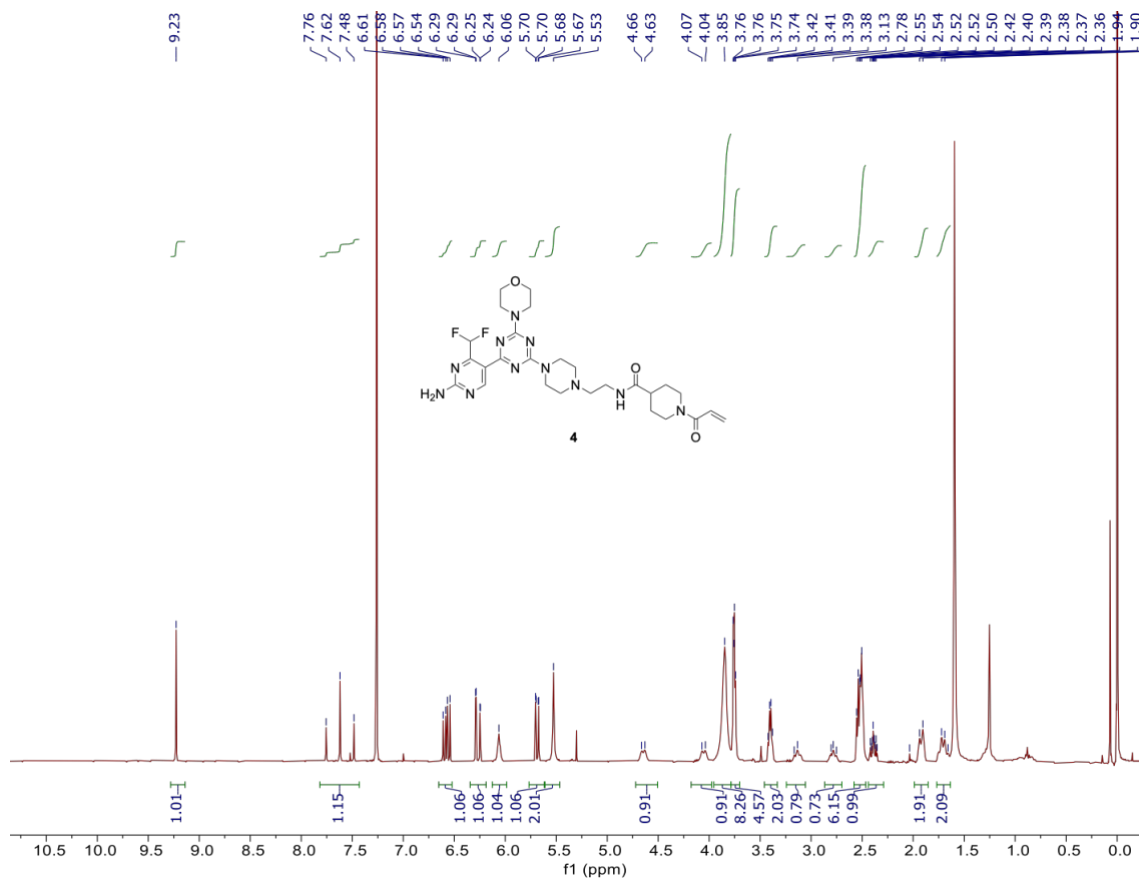

Figure S13. <sup>1</sup>H-NMR of compound 4 (400 MHz) in CDCl<sub>3</sub>.

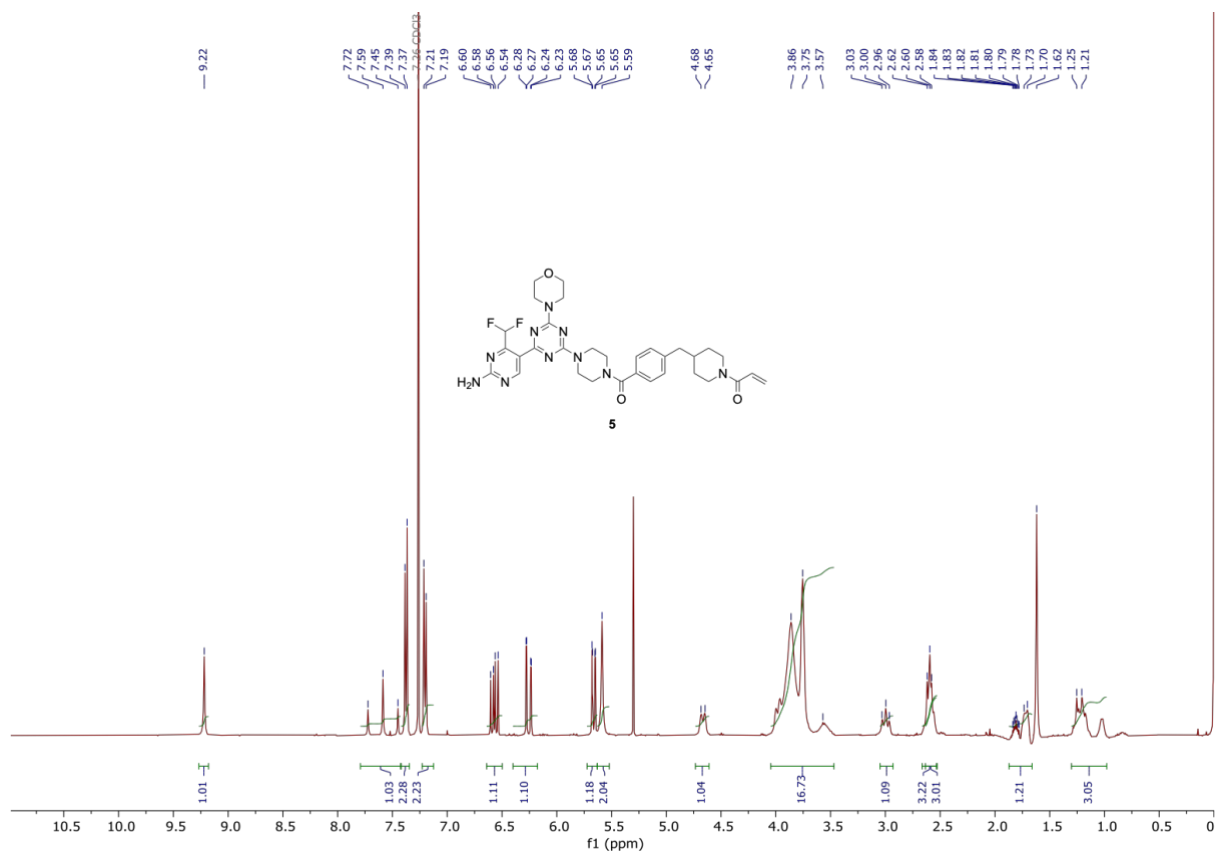

Figure S14. <sup>1</sup>H-NMR of compound 5 (400 MHz) in CDCl<sub>3</sub>.

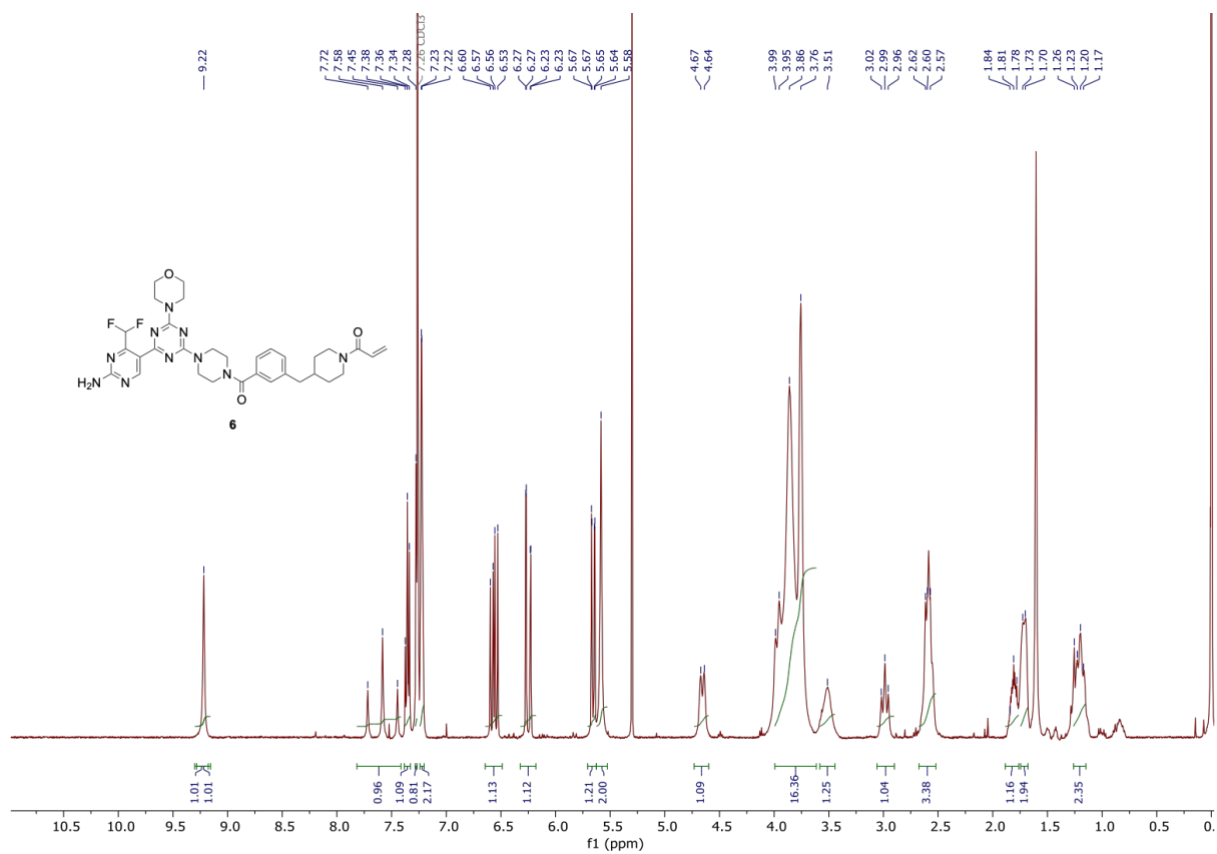

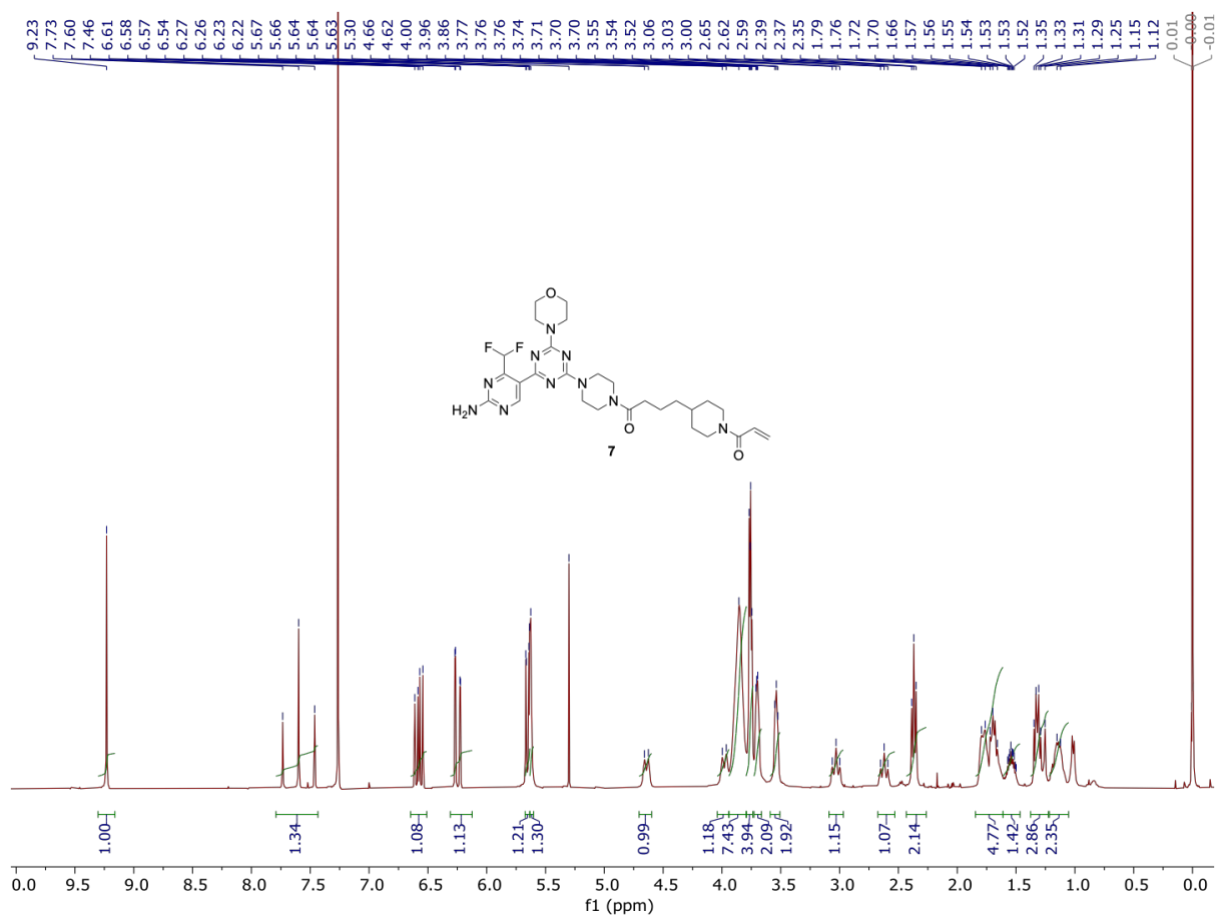

Figure S16. <sup>1</sup>H-NMR of compound 7 (400 MHz) in CDCl<sub>3</sub>.

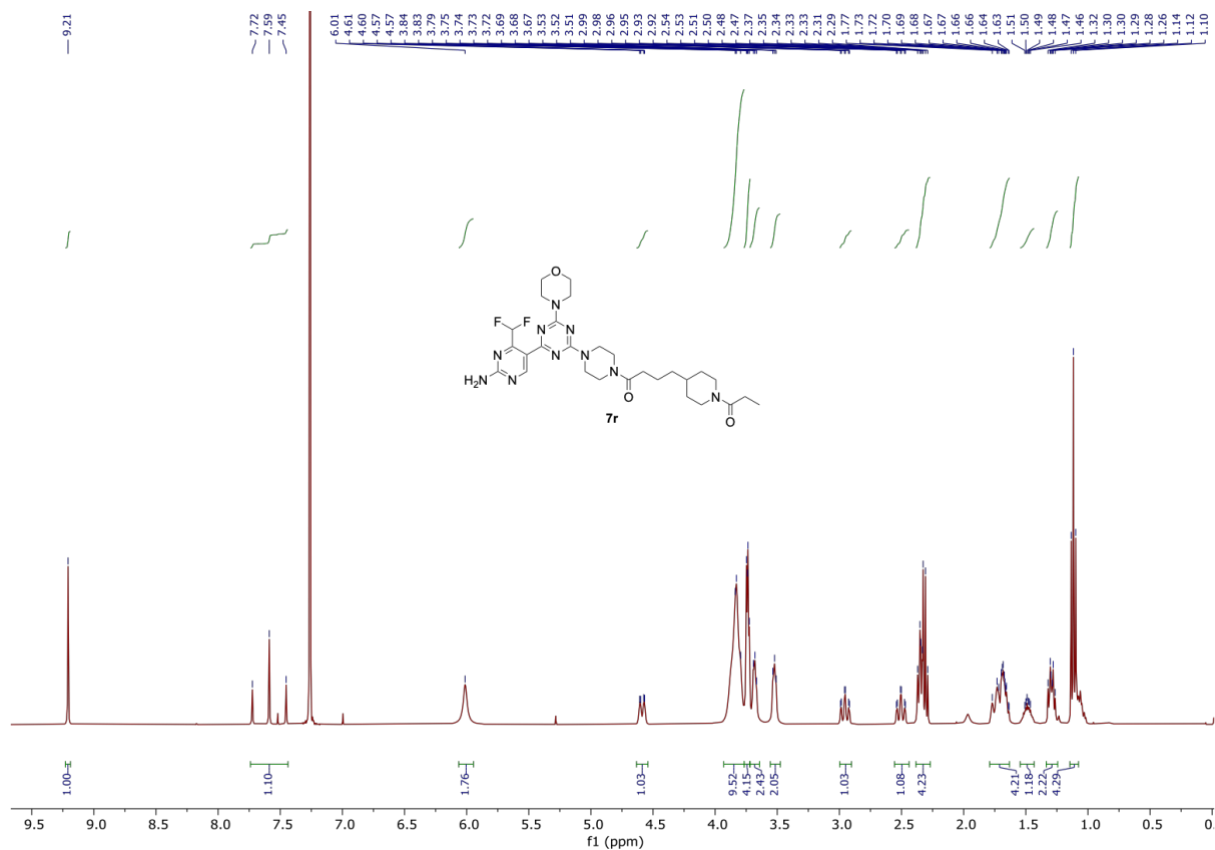

Figure S17. <sup>1</sup>H-NMR of compound 7r (400 MHz) in CDCl<sub>3</sub>.

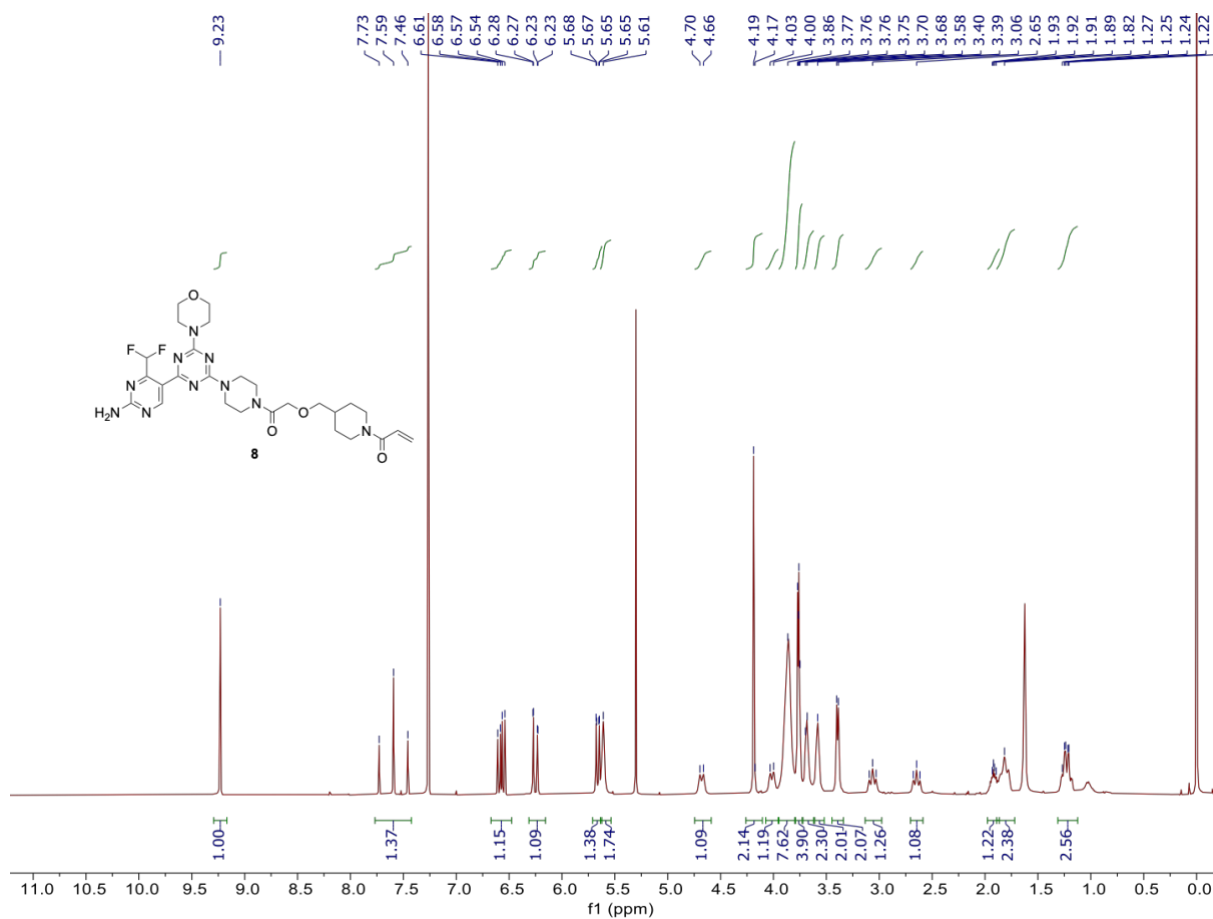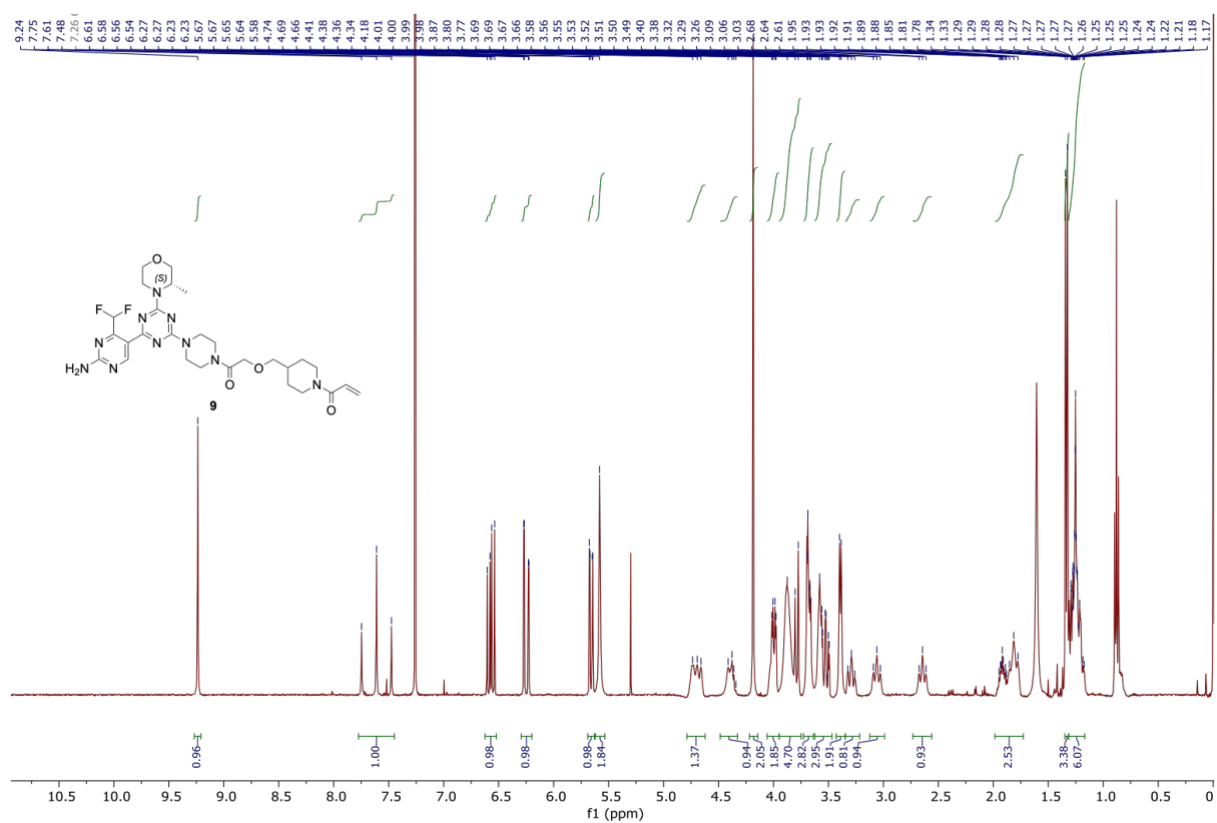

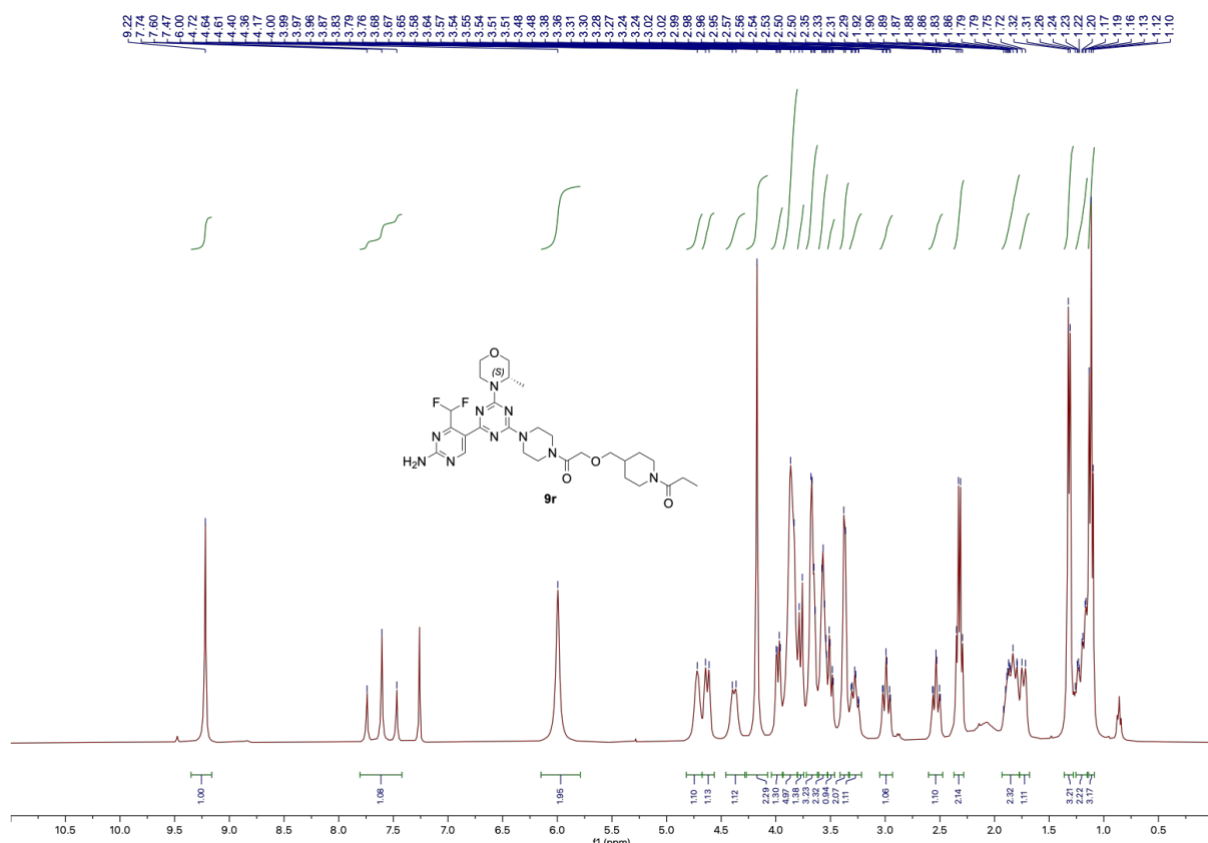

**Figure S20. <sup>1</sup>H-NMR of compound **9r** (400 MHz) in CDCl<sub>3</sub>.**

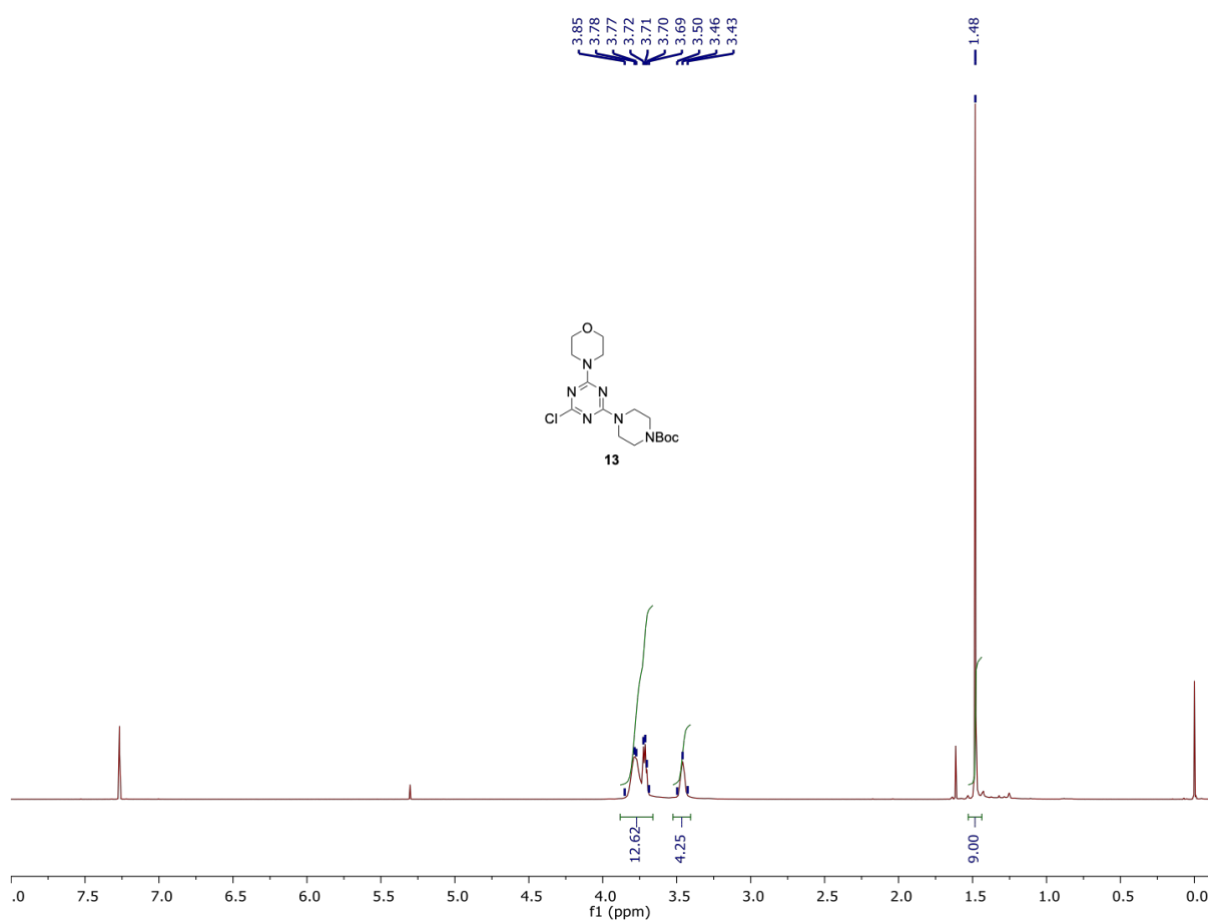

**Figure S21. <sup>1</sup>H-NMR of compound **13** (400 MHz) in CDCl<sub>3</sub>.**



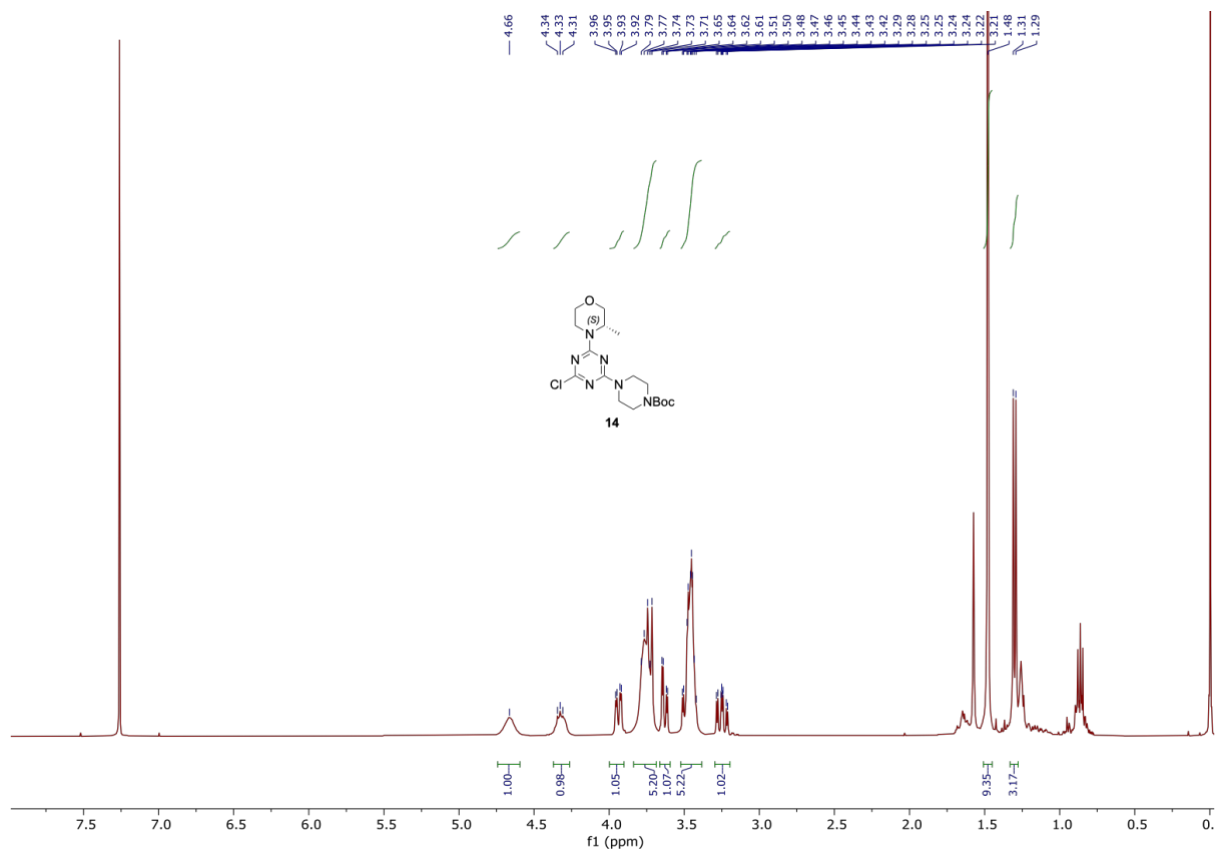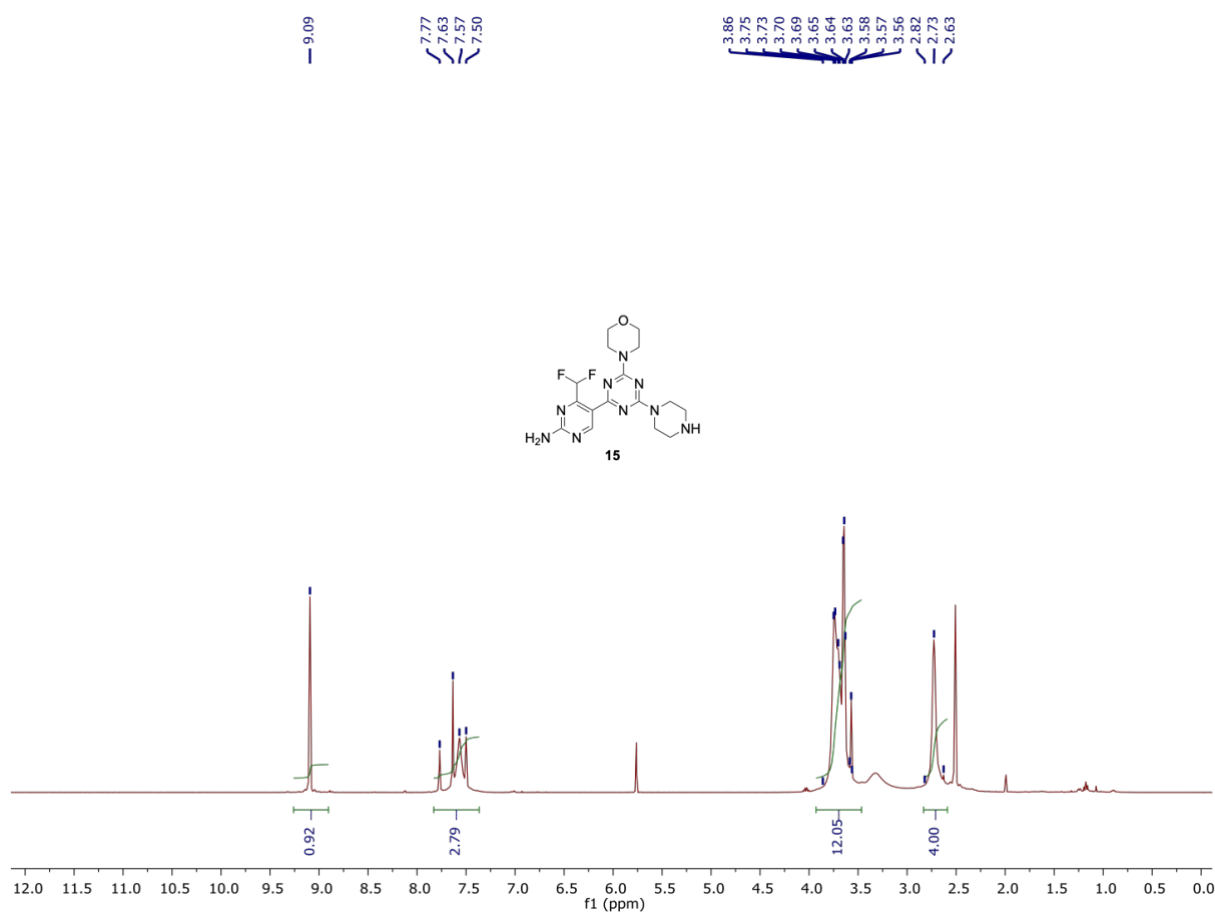

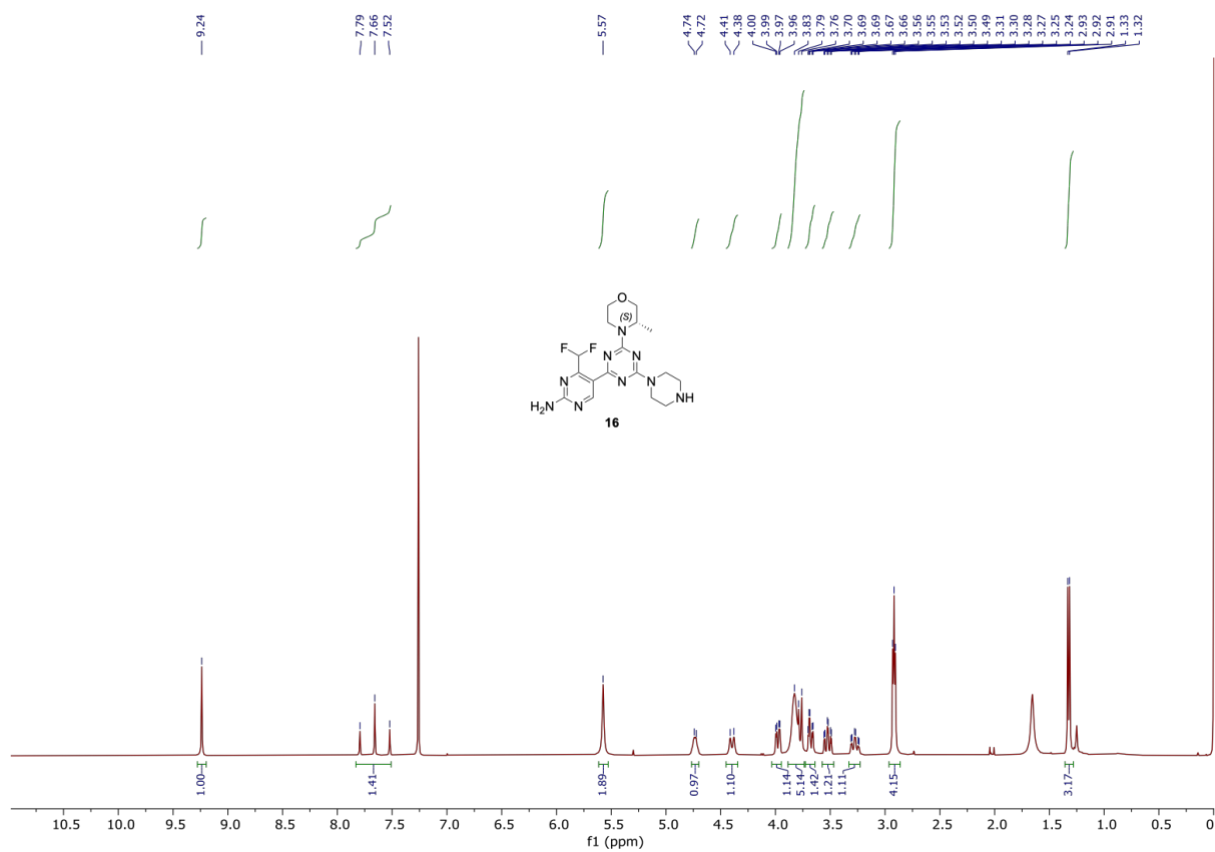

Figure S24. <sup>1</sup>H-NMR of compound **16** (400 MHz) in CDCl<sub>3</sub>.

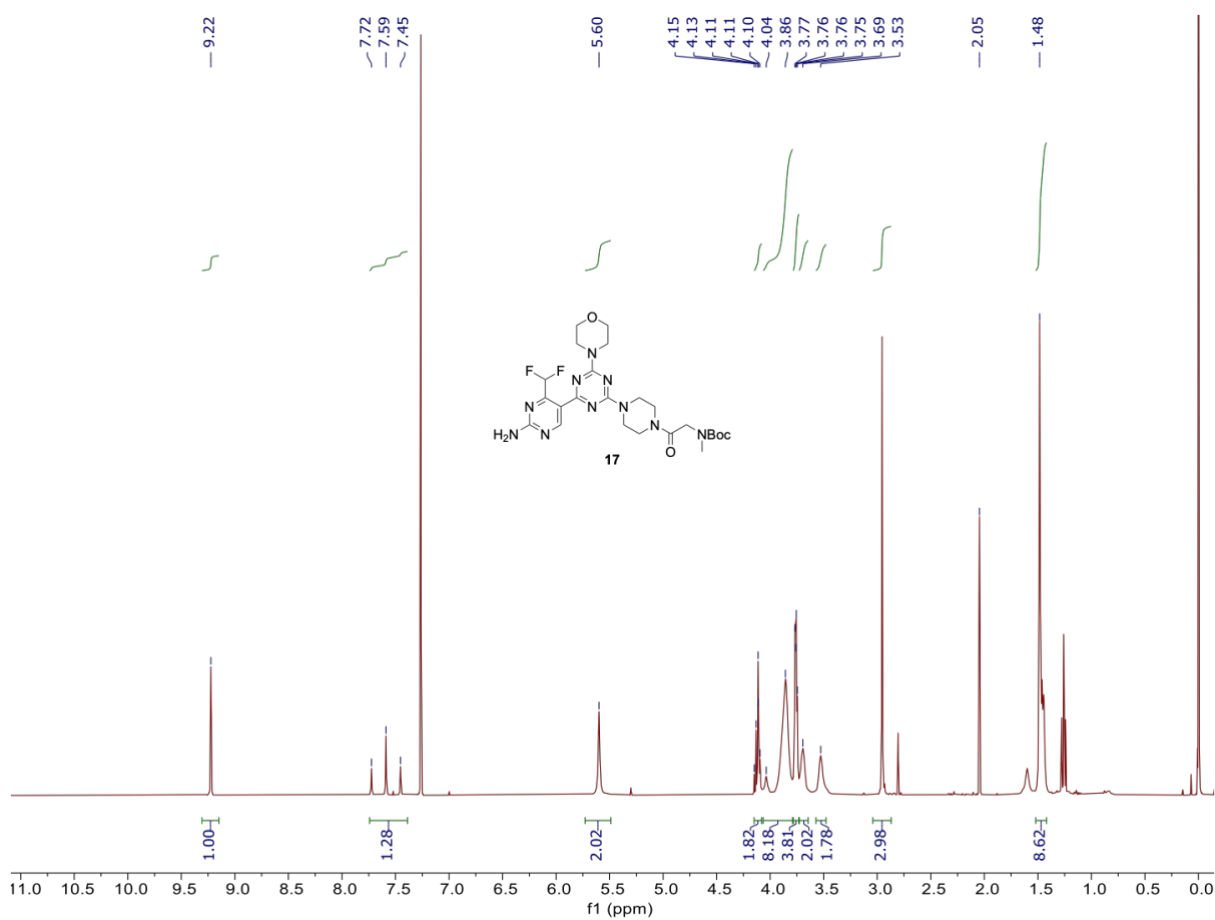

Figure S25. <sup>1</sup>H-NMR of compound **17** (400 MHz) in CDCl<sub>3</sub>.

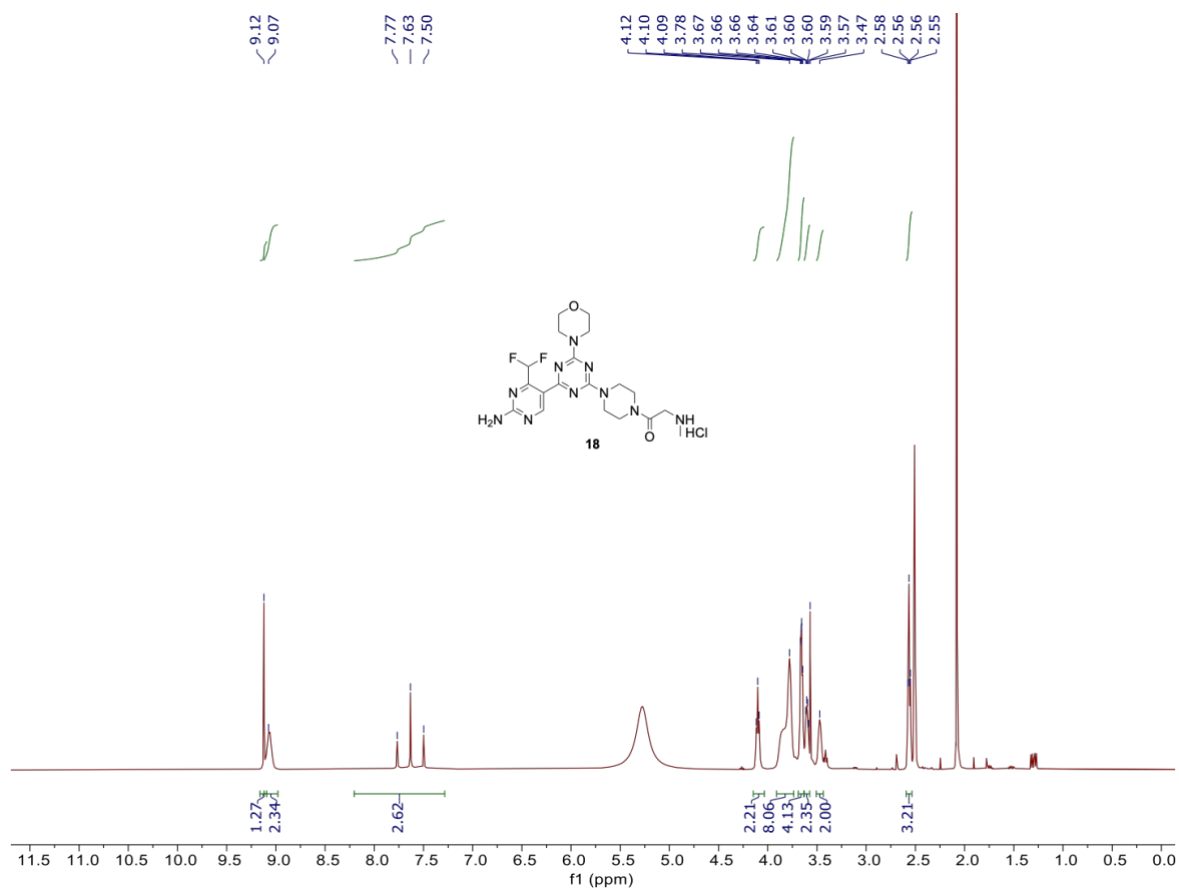

**Figure S26.** <sup>1</sup>H-NMR of compound 18 (400 MHz) in DMSO-*d*<sub>6</sub>.

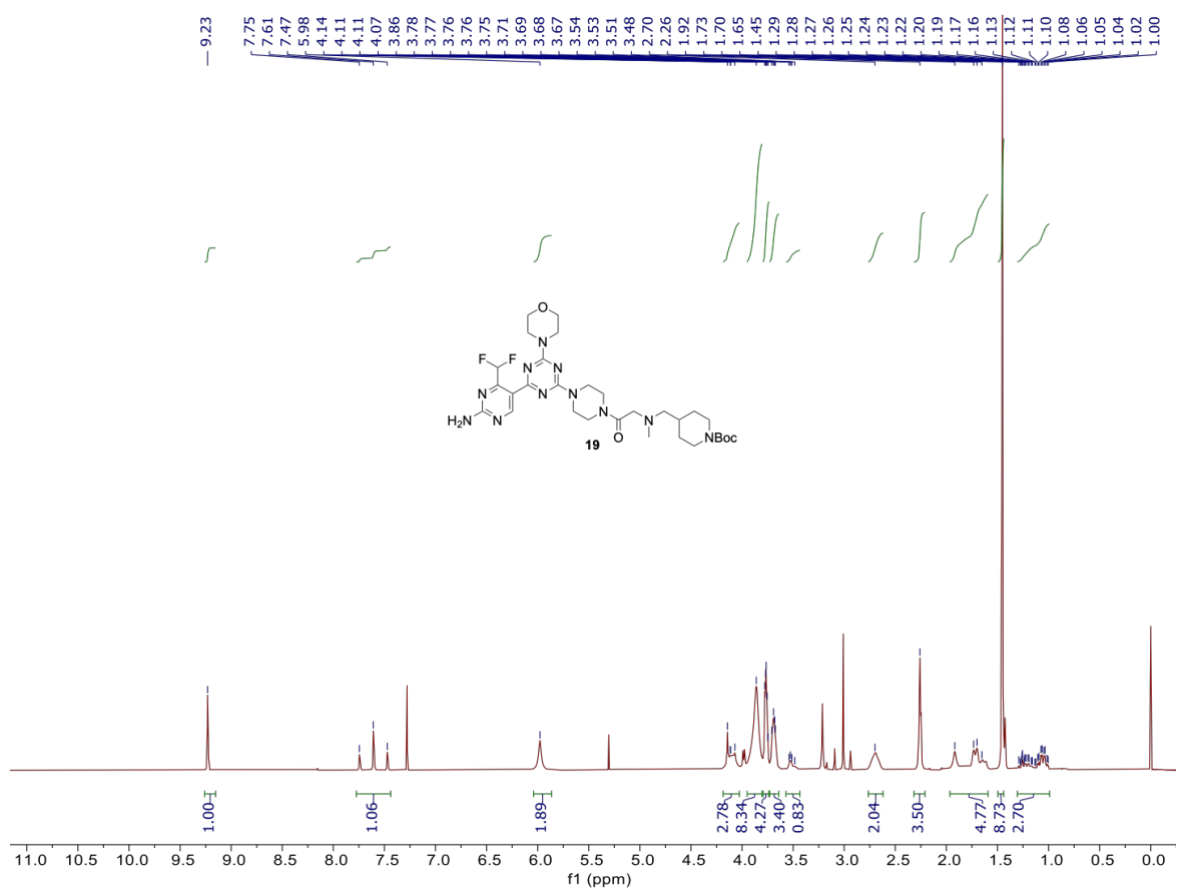

**Figure S27.** <sup>1</sup>H-NMR of compound 19 (400 MHz) in CDCl<sub>3</sub>.

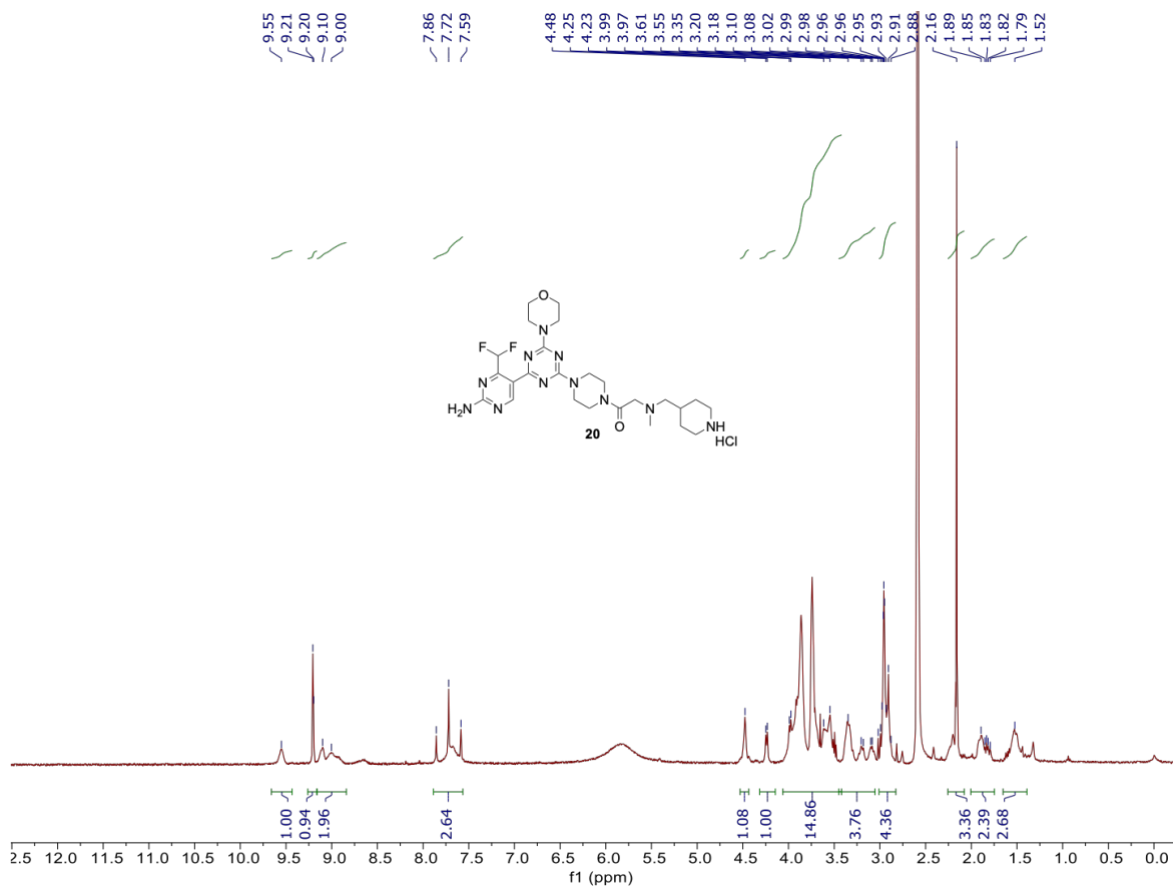

**Figure S28.**  $^1\text{H-NMR}$  of compound **20** (400 MHz) in  $\text{DMSO-}d_6$ .

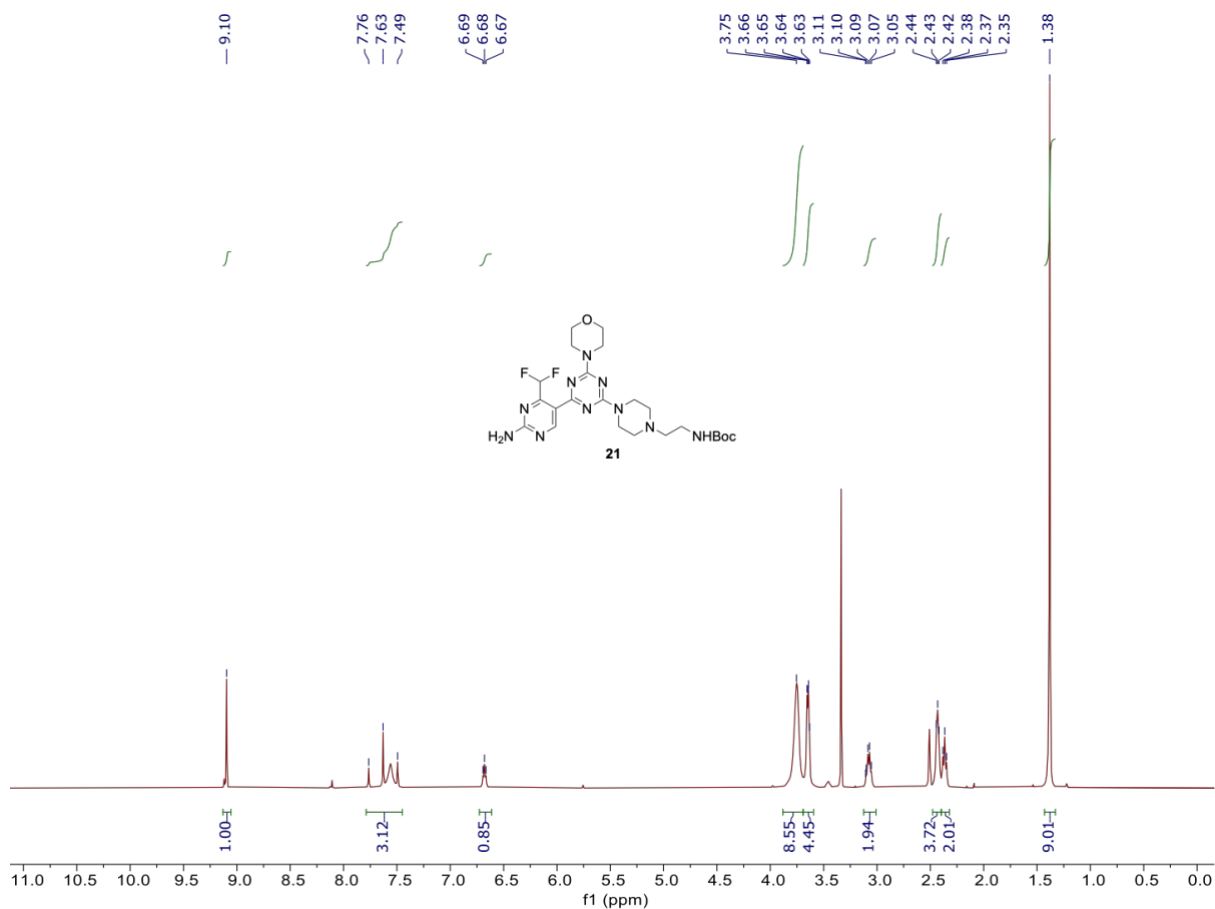

**Figure S29.**  $^1\text{H-NMR}$  of compound **21** (400 MHz) in  $\text{DMSO-}d_6$ .

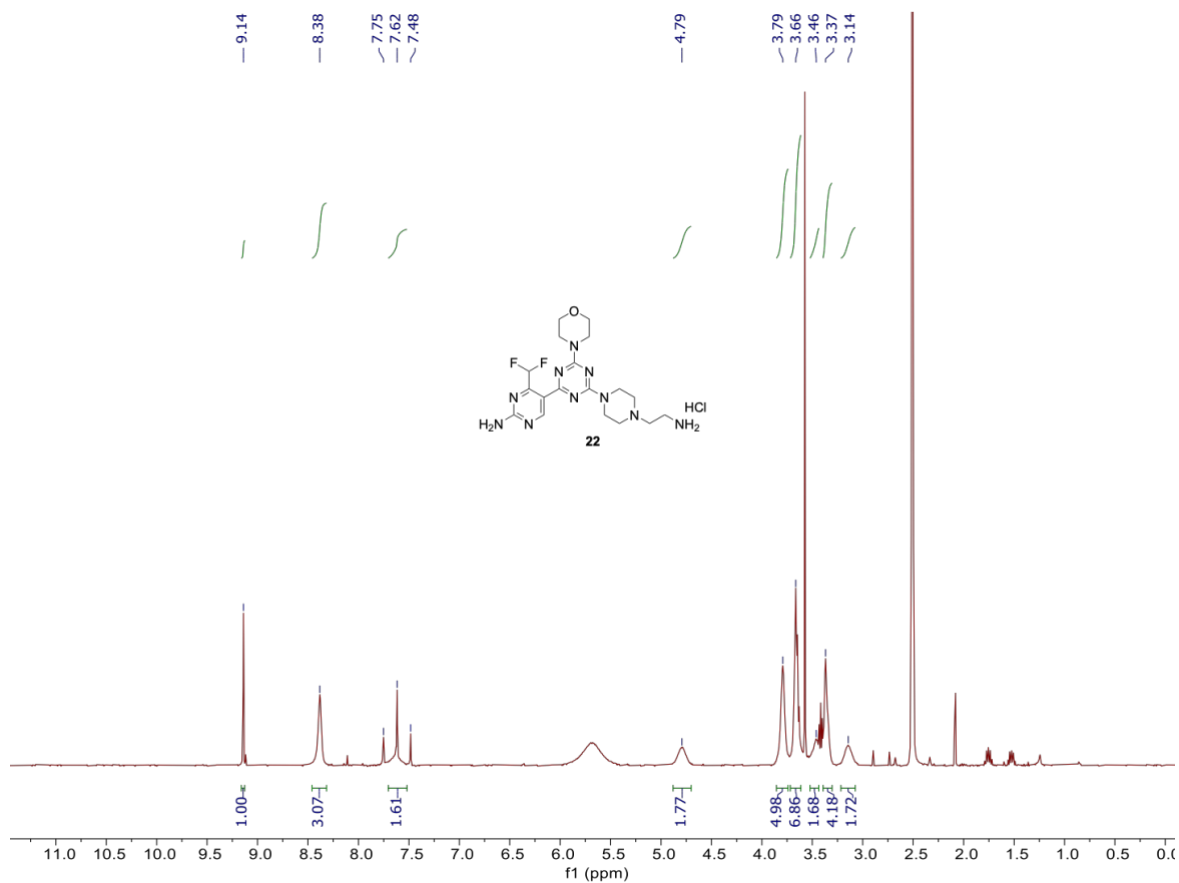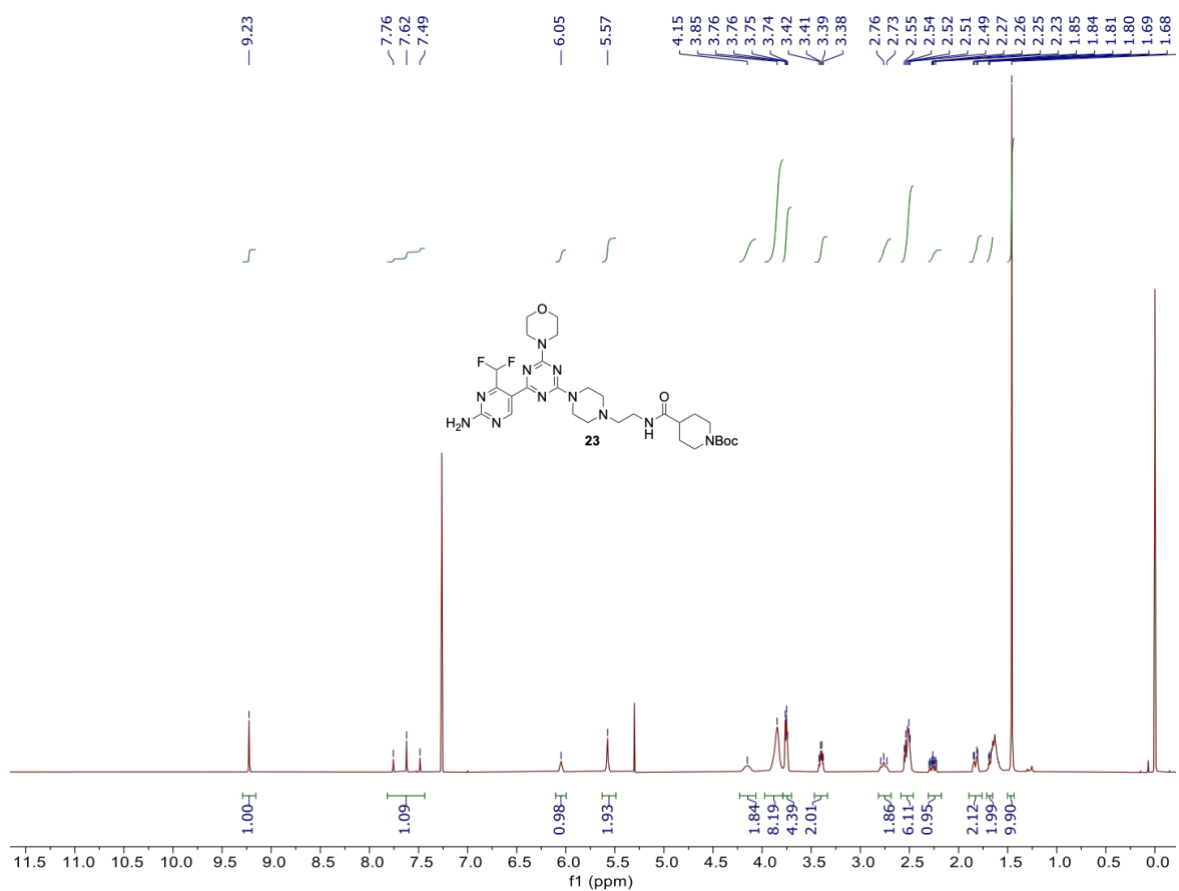

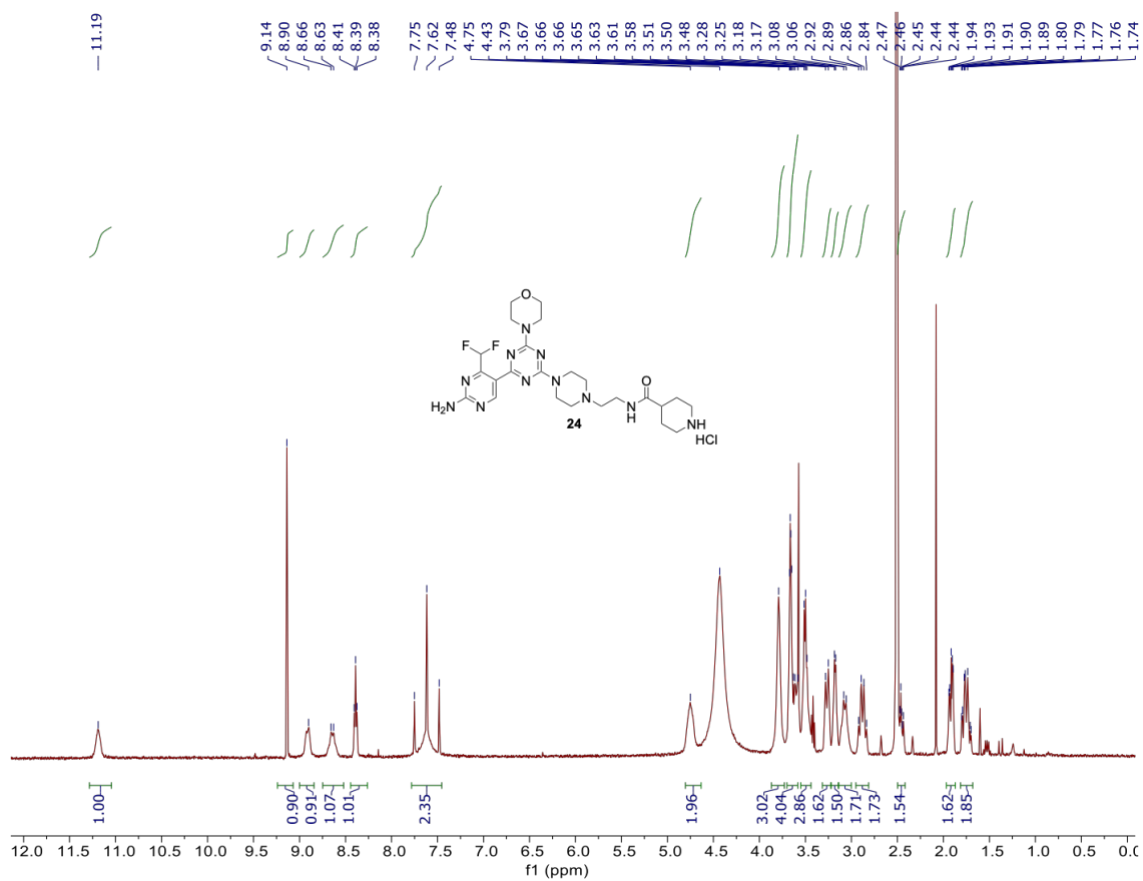

Figure S32. <sup>1</sup>H-NMR of compound 24 (400 MHz) in DMSO-d<sub>6</sub>.

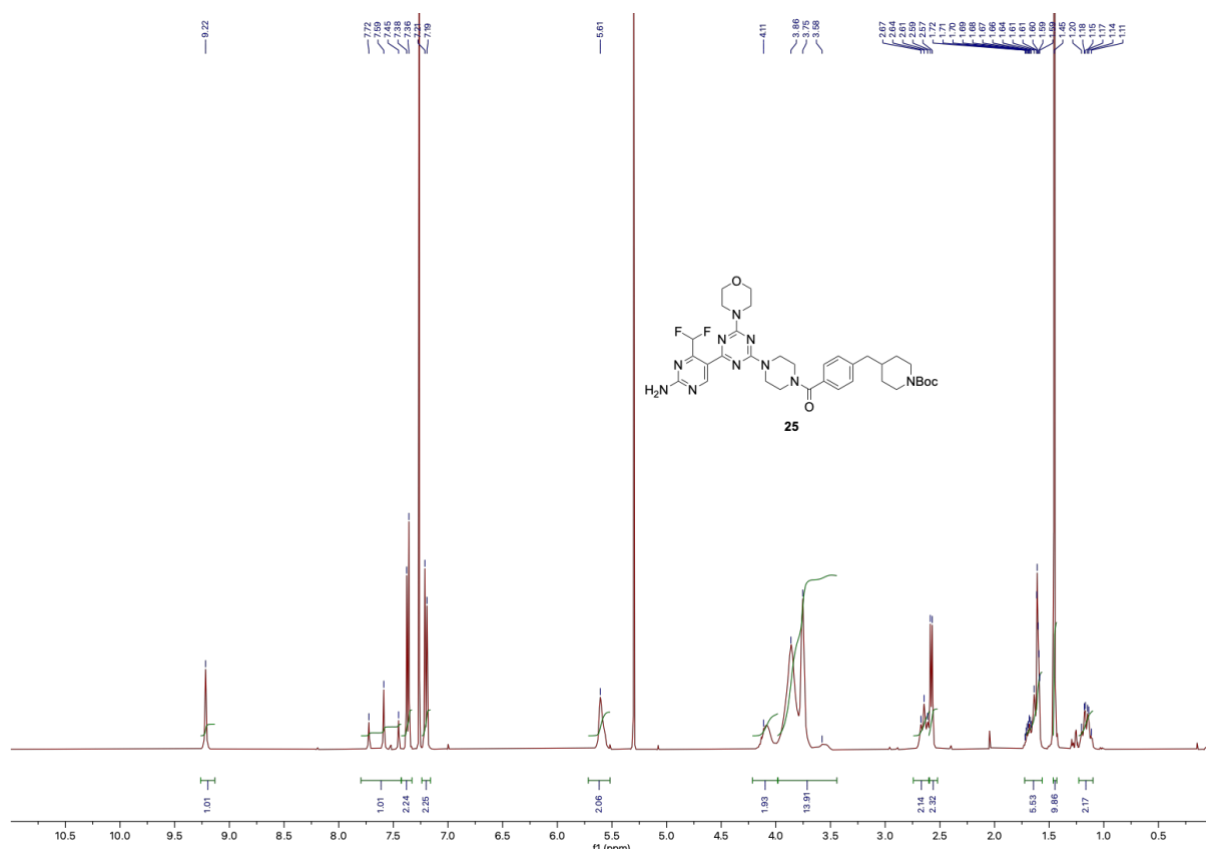

Figure S33. <sup>1</sup>H-NMR of compound 25 (400 MHz) in CDCl<sub>3</sub>.

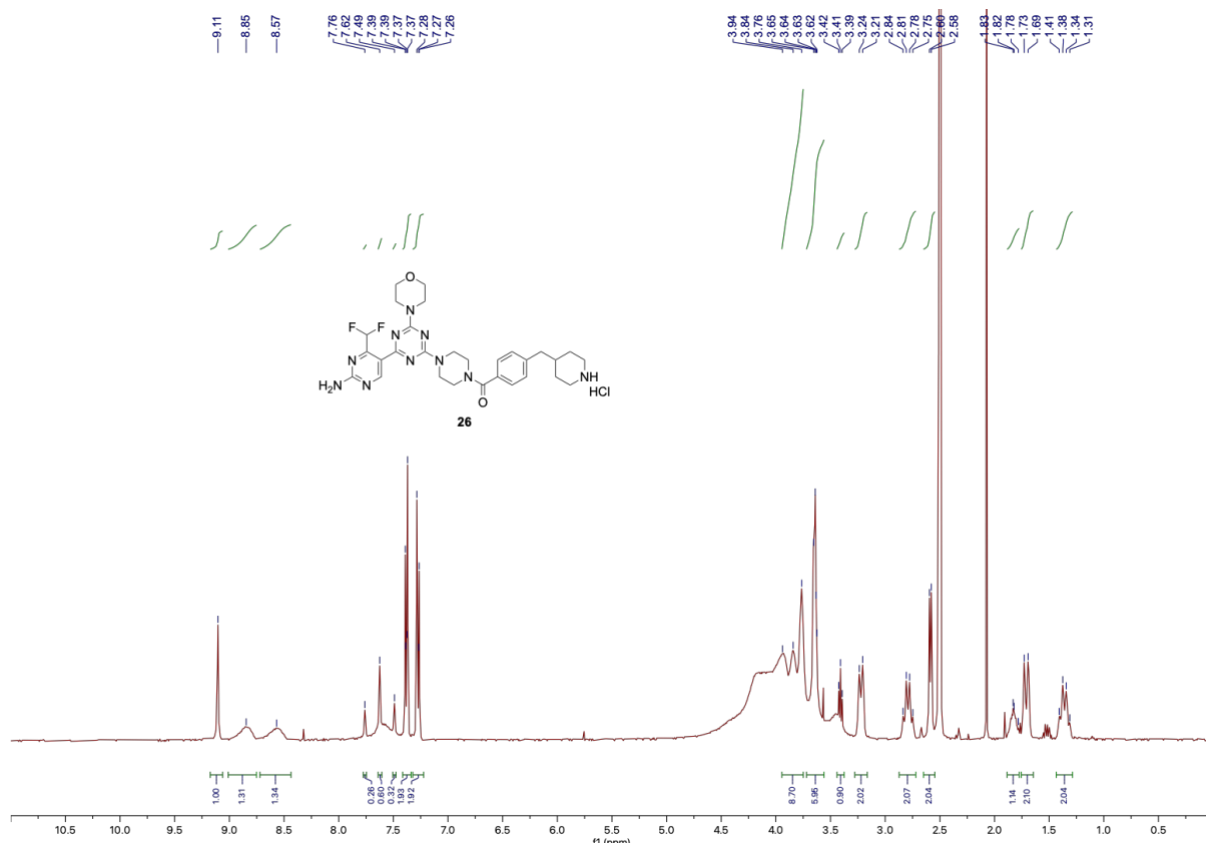

Figure S34. <sup>1</sup>H-NMR of compound 26 (400 MHz) in DMSO-d<sub>6</sub>.

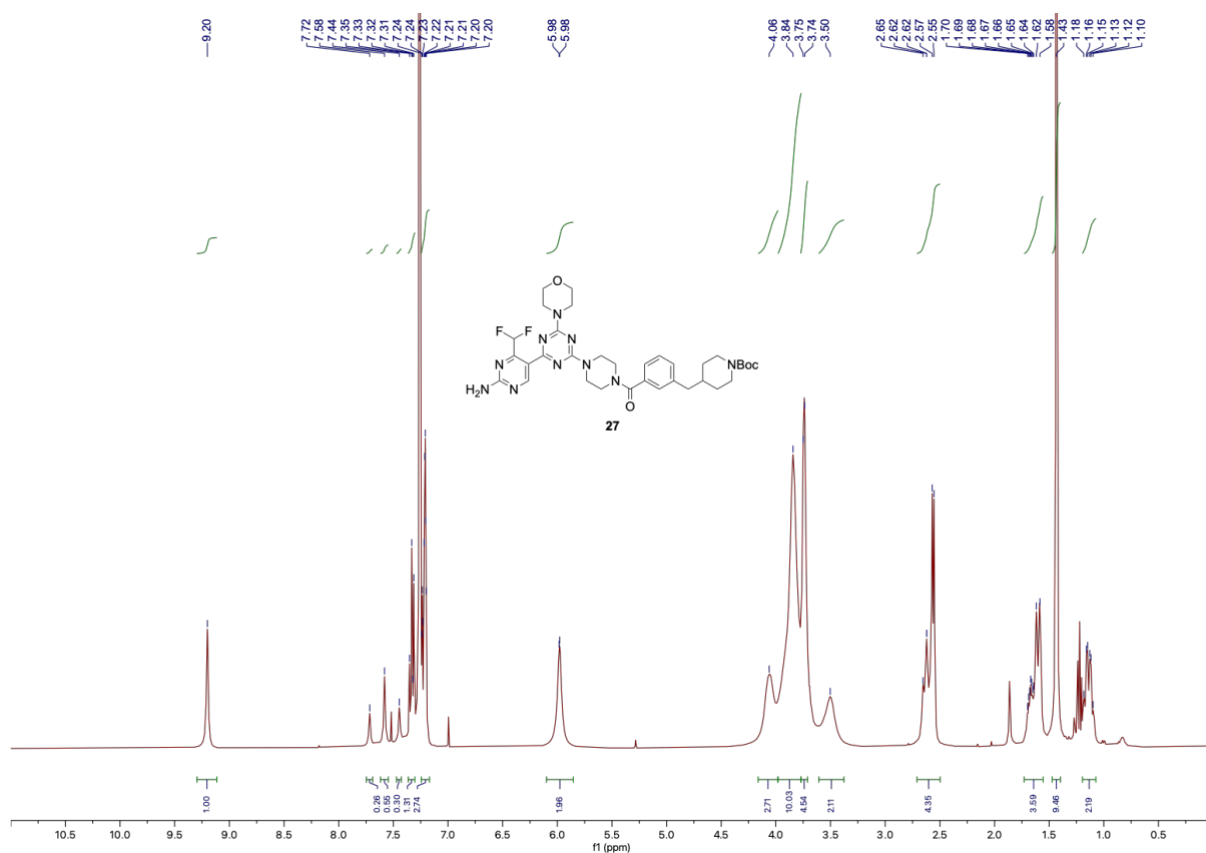

Figure S35. <sup>1</sup>H-NMR of compound 27 (400 MHz) in CDCl<sub>3</sub>.

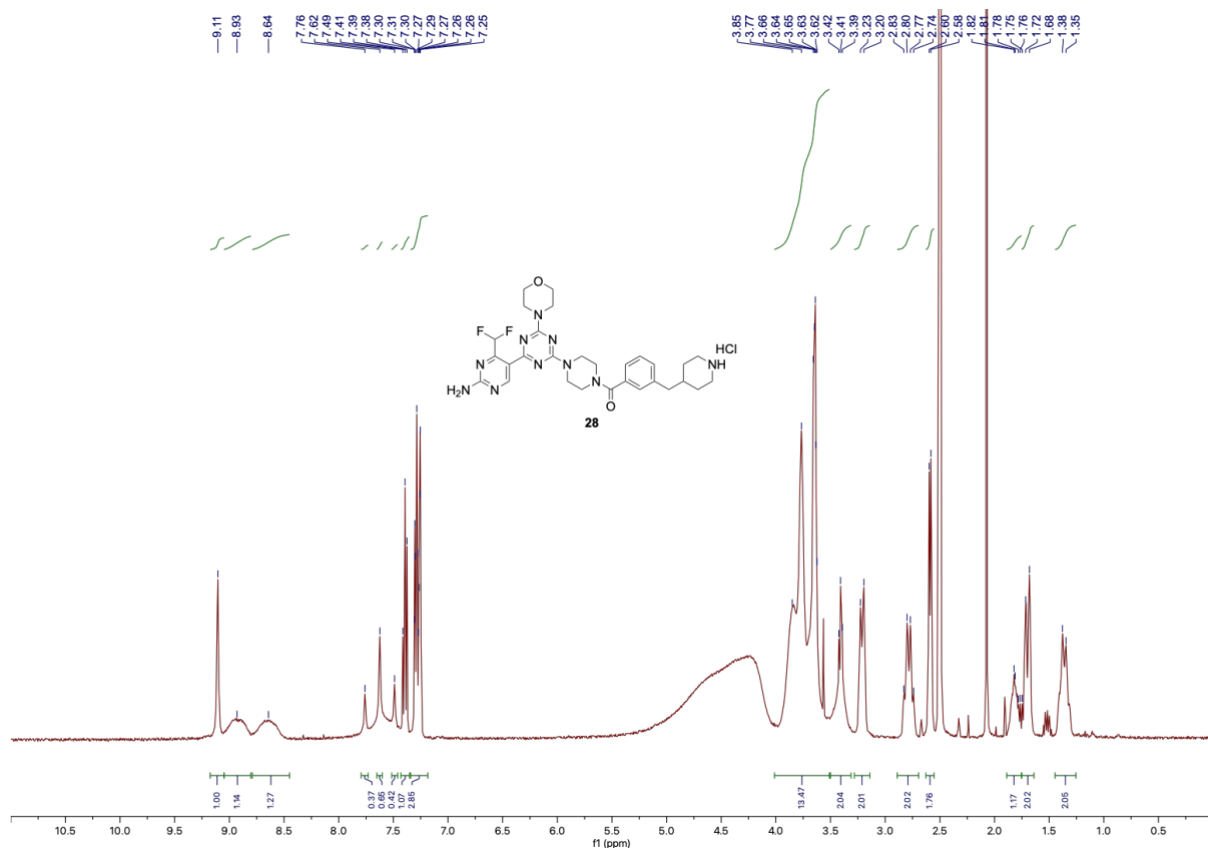

Figure S36.  $^1\text{H-NMR}$  of compound 28 (400 MHz) in  $\text{DMSO-d}_6$ .

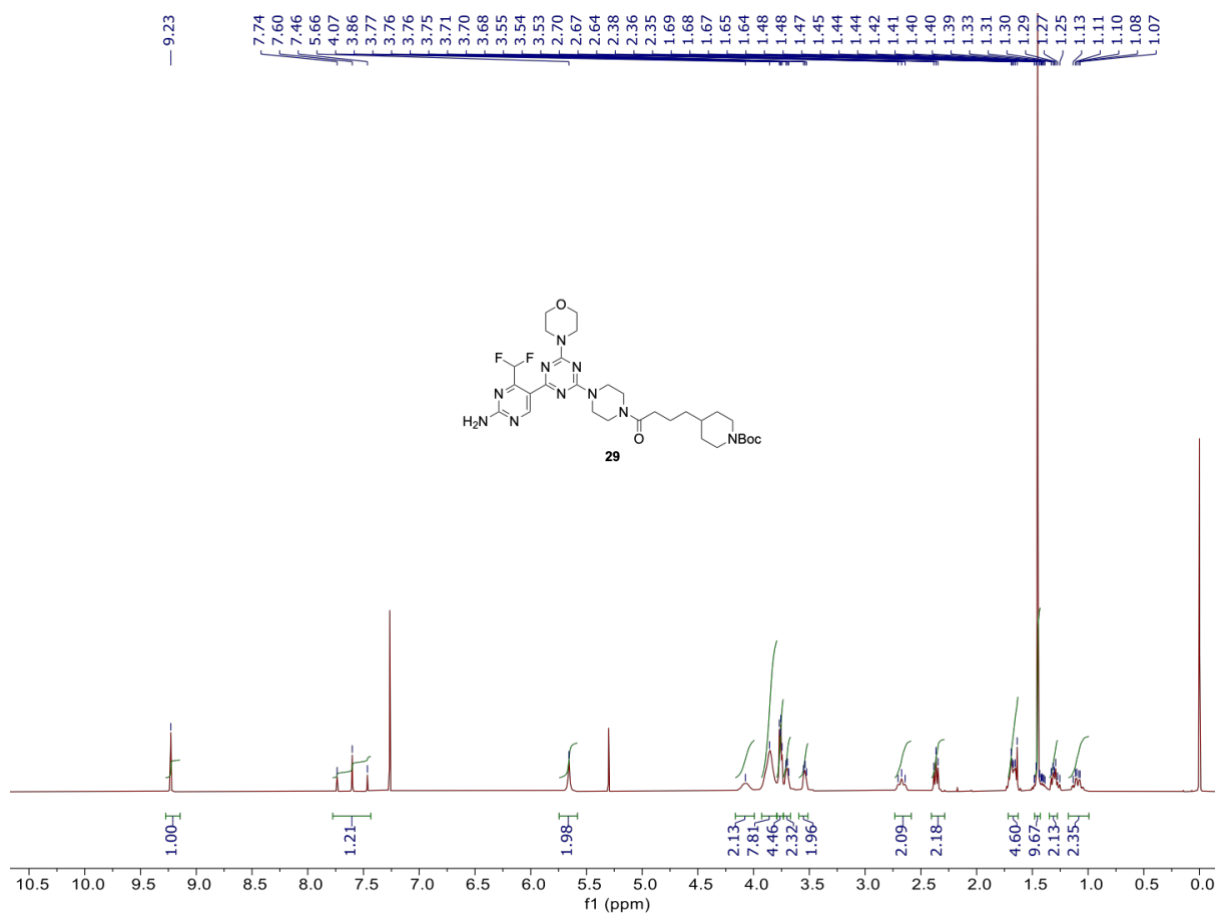

Figure S37.  $^1\text{H-NMR}$  of compound 29 (400 MHz) in  $\text{CDCl}_3$ .



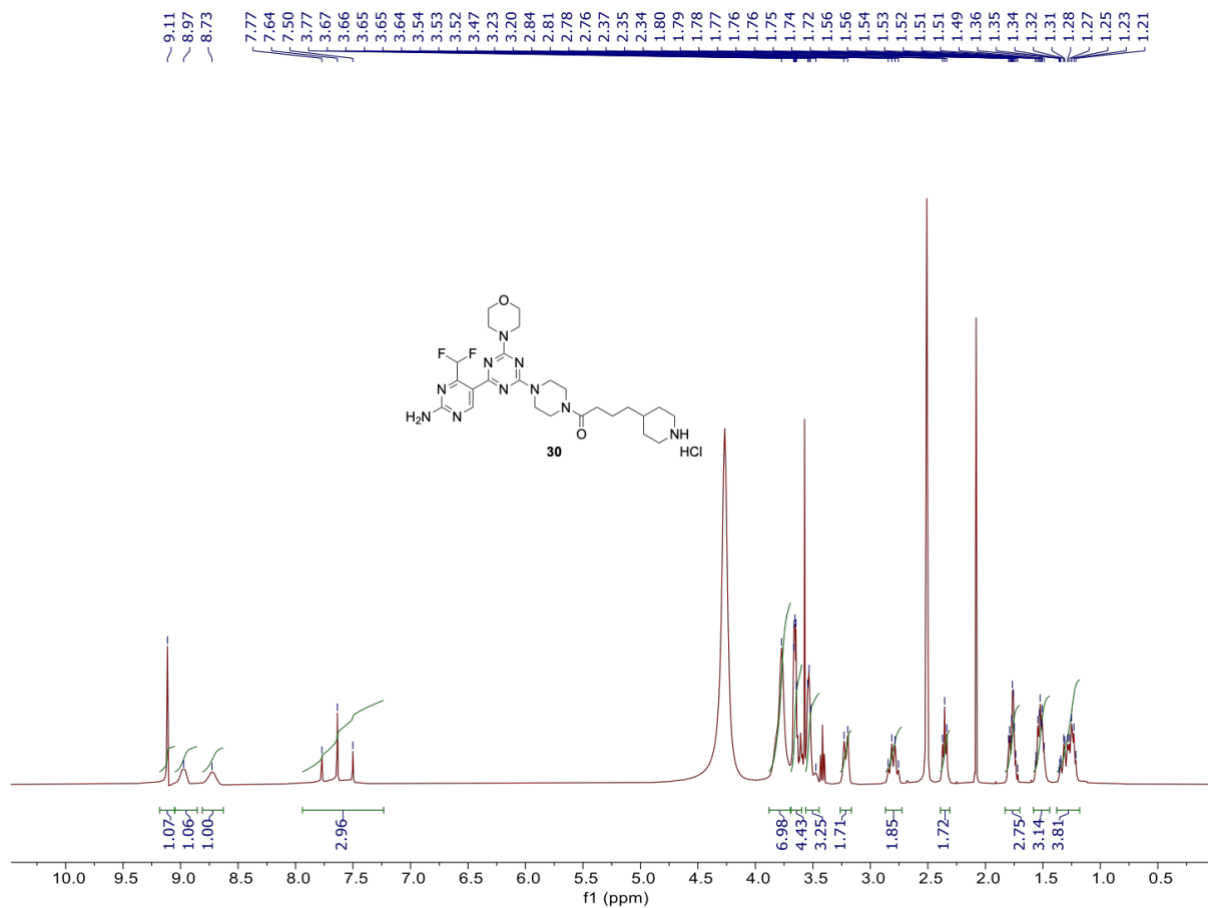

Figure S38. <sup>1</sup>H-NMR of compound 30 (400 MHz) in DMSO-*d*<sub>6</sub>.

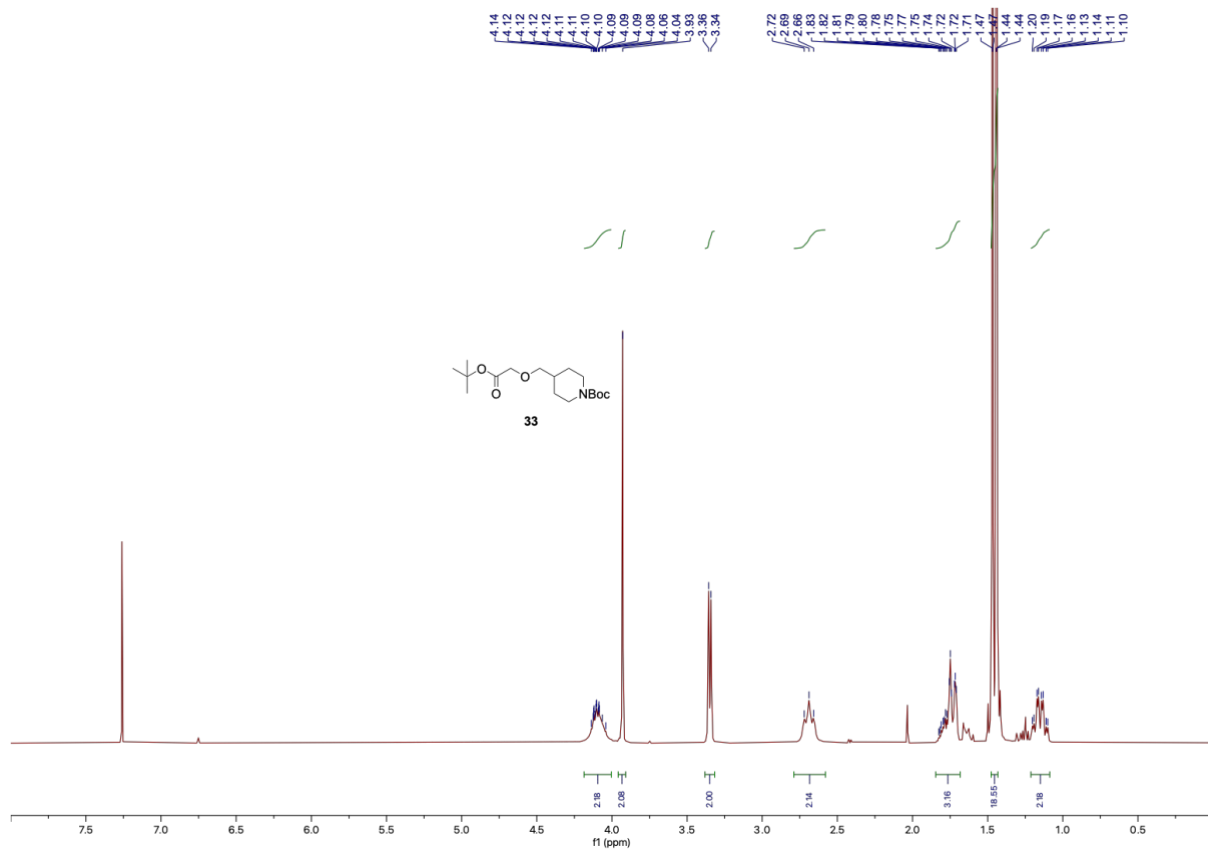

Figure S39. <sup>1</sup>H-NMR of compound 33 (400 MHz) in CDCl<sub>3</sub>.

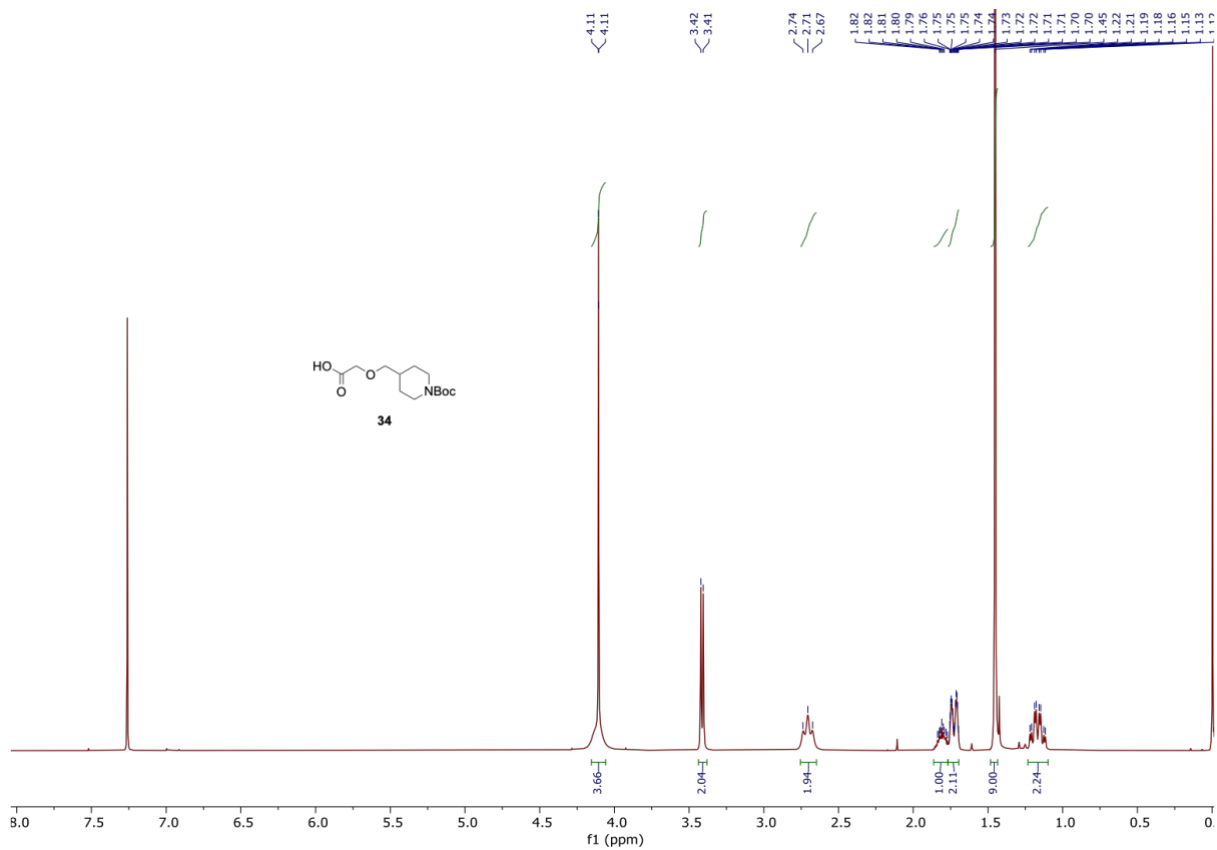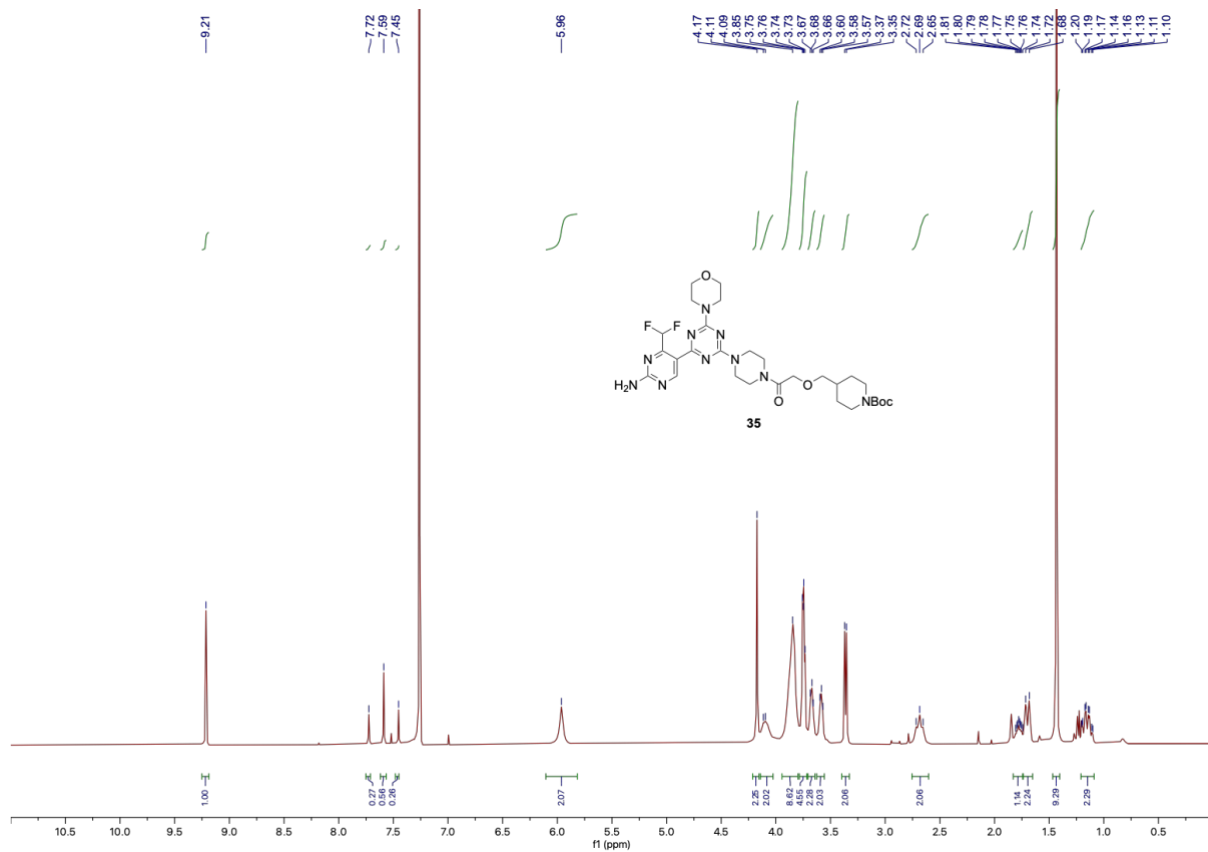

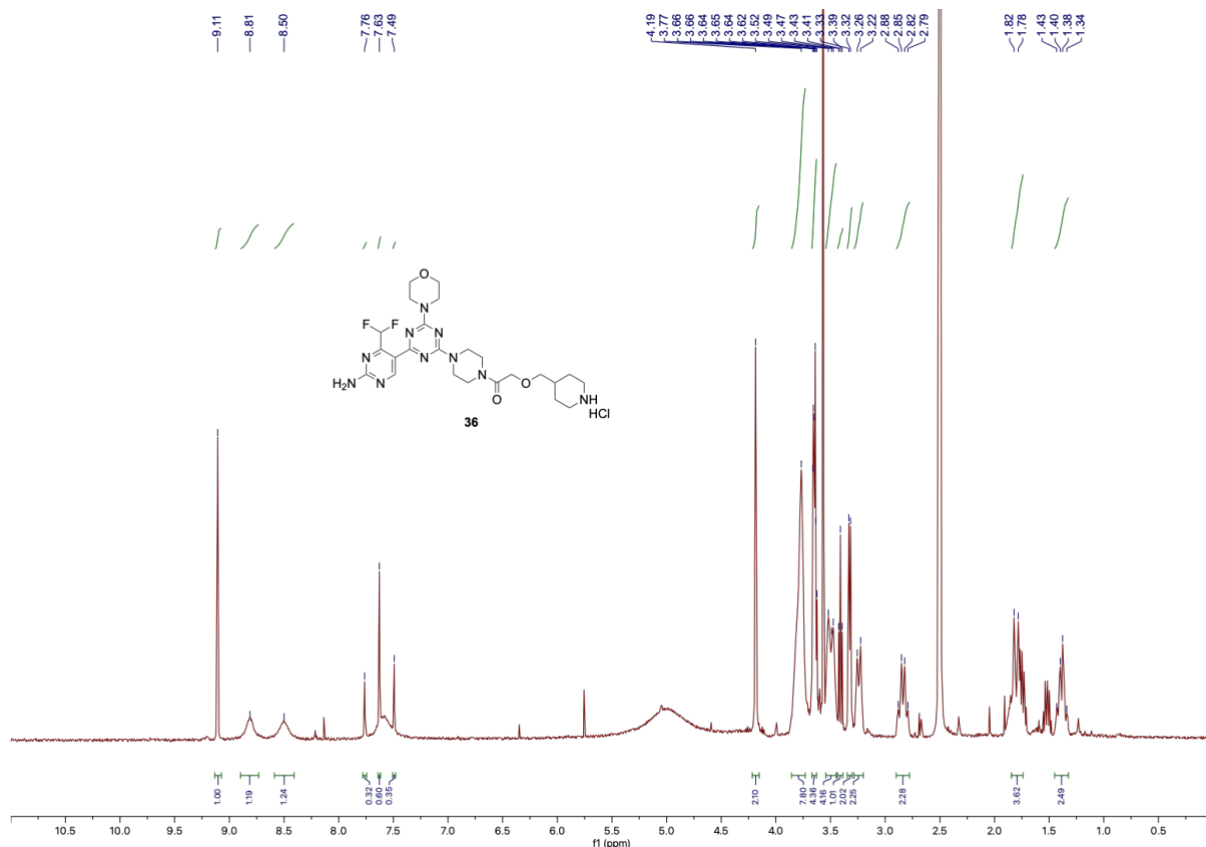

Figure S42. <sup>1</sup>H-NMR of compound 36 (400 MHz) in DMSO-*d*<sub>6</sub>.

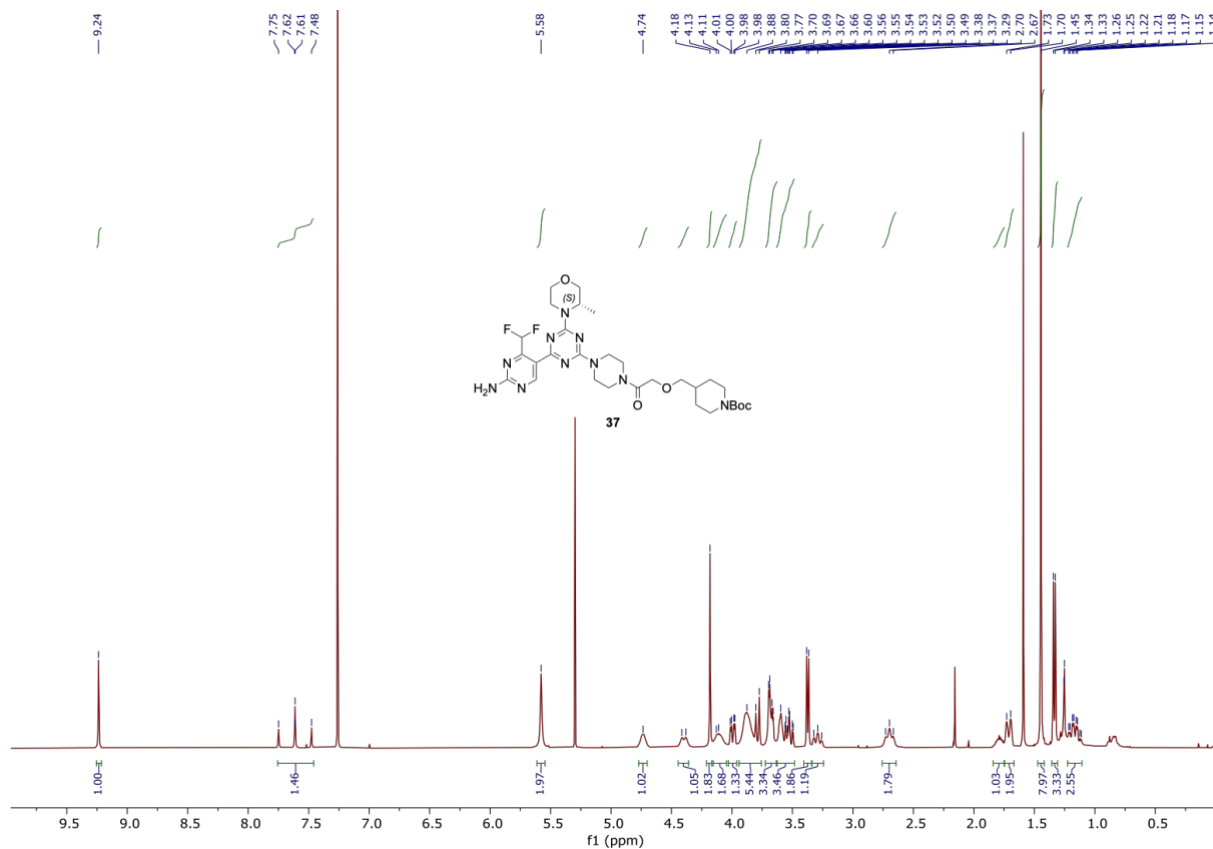

Figure S43. <sup>1</sup>H-NMR of compound 37 (400 MHz) in CDCl<sub>3</sub>.



# <sup>13</sup>C-NMR spectra

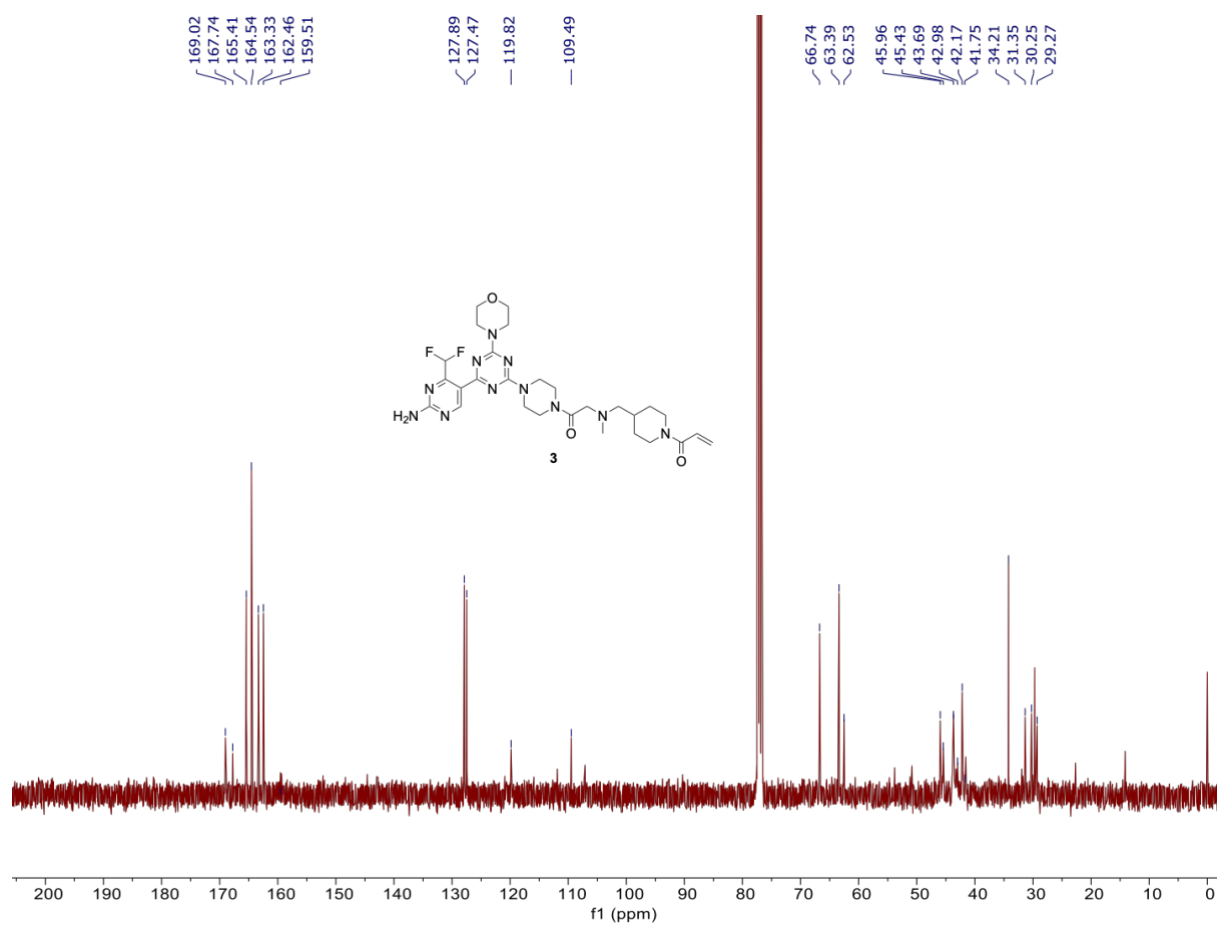

Figure S45. <sup>13</sup>C-NMR of compound 3 (101 MHz) in CDCl<sub>3</sub>.

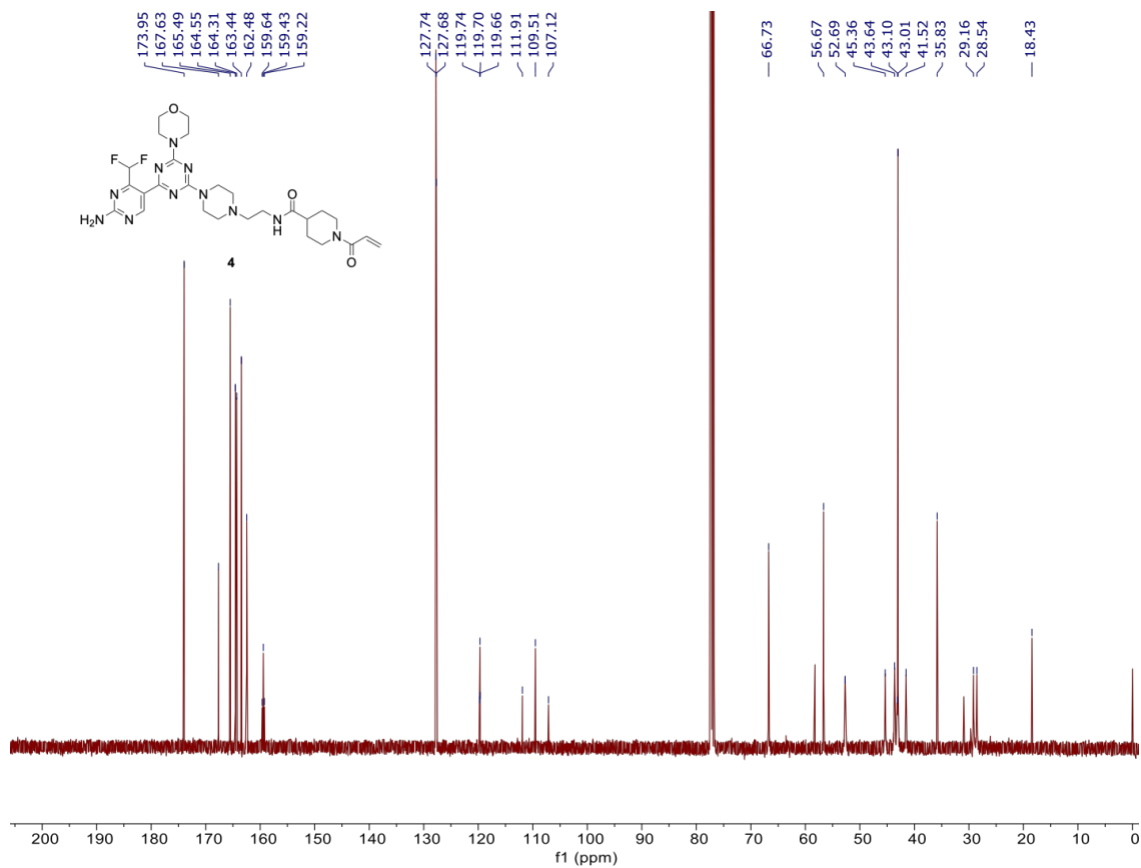

Figure S46. <sup>13</sup>C-NMR of compound **4** (101 MHz) in CDCl<sub>3</sub>.

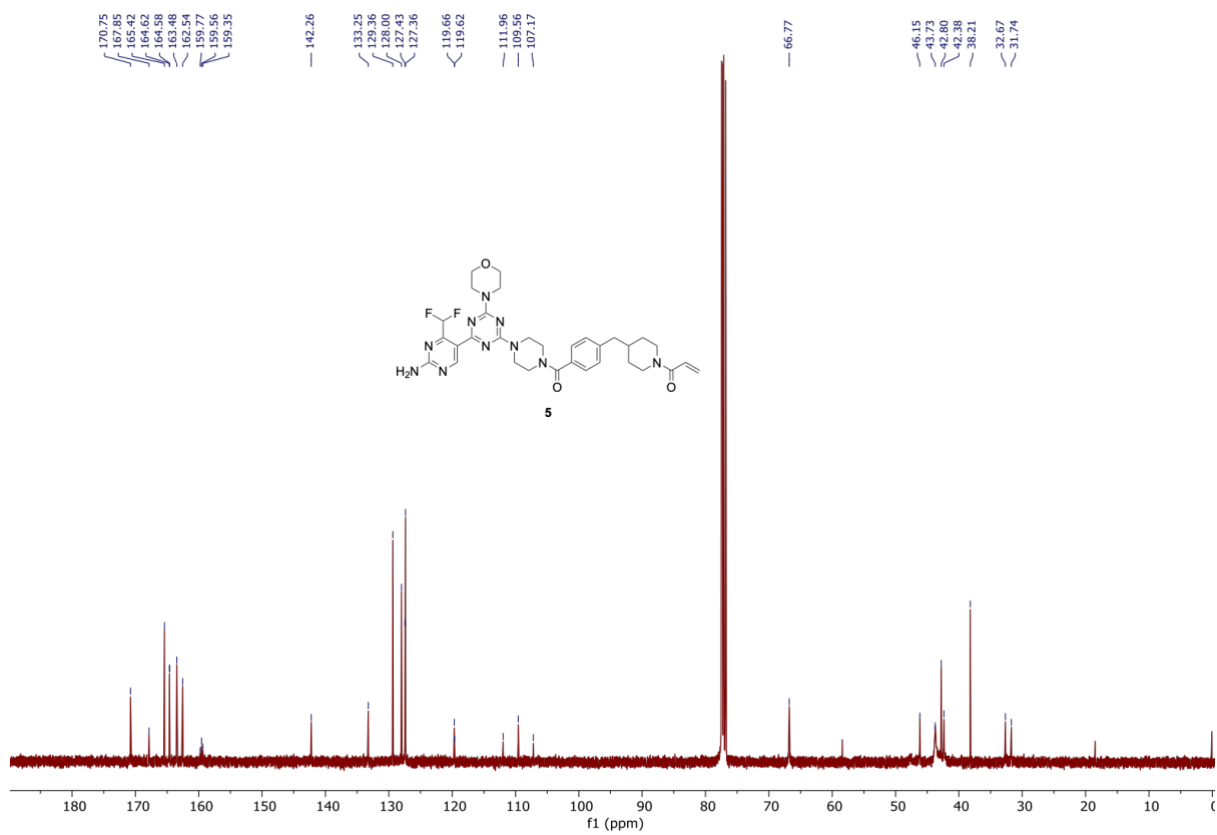

Figure S47. <sup>13</sup>C-NMR of compound **5** (101 MHz) in CDCl<sub>3</sub>.

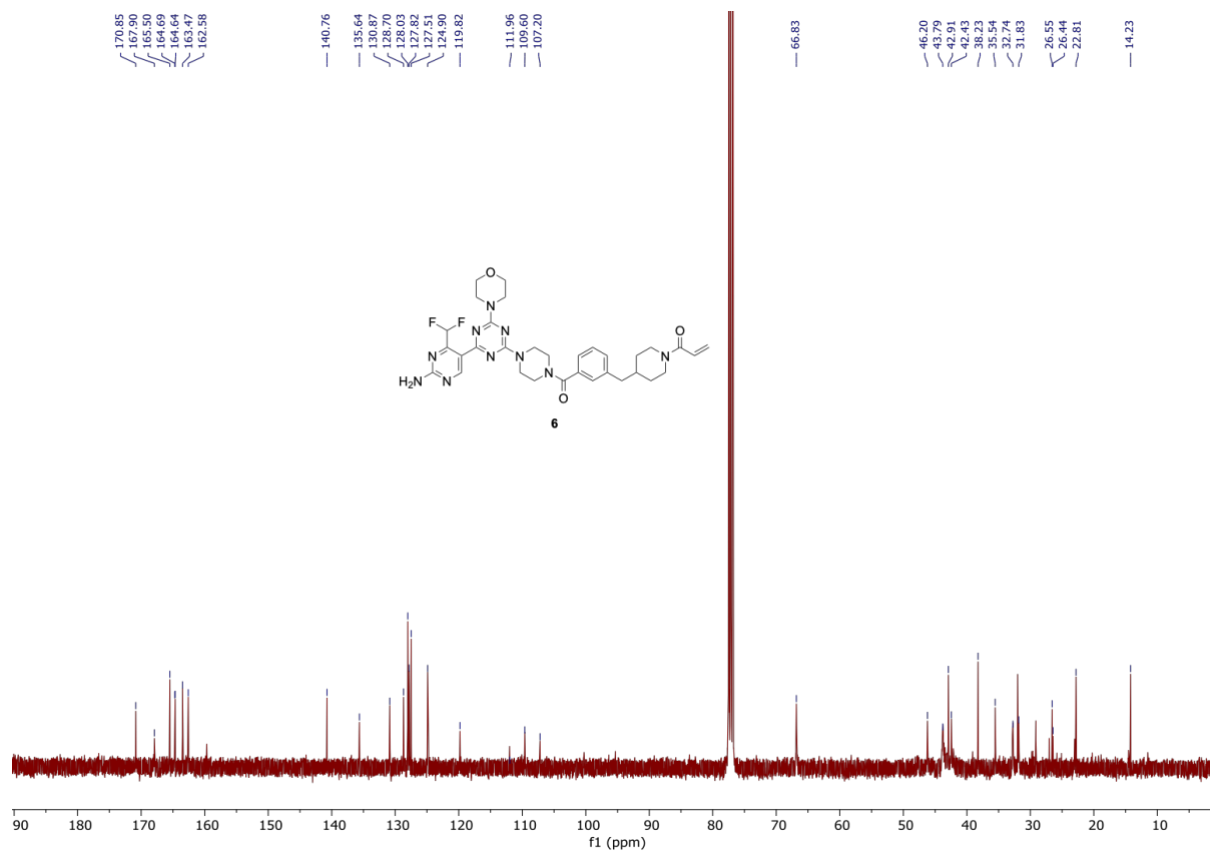

**Figure S48.** <sup>13</sup>C-NMR of compound **6** (101 MHz) in CDCl<sub>3</sub>.

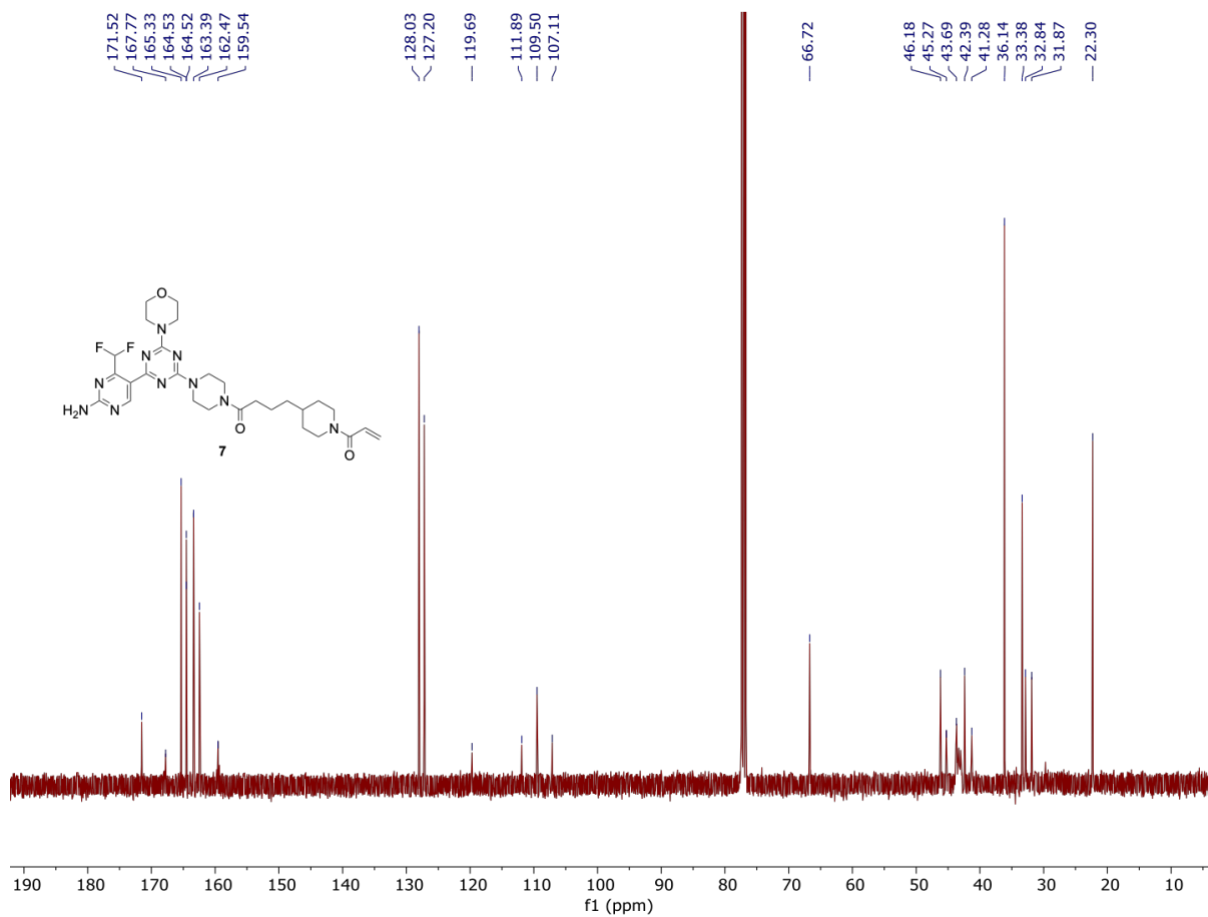

Figure S49. <sup>13</sup>C-NMR of compound 7 (101 MHz) in CDCl<sub>3</sub>.

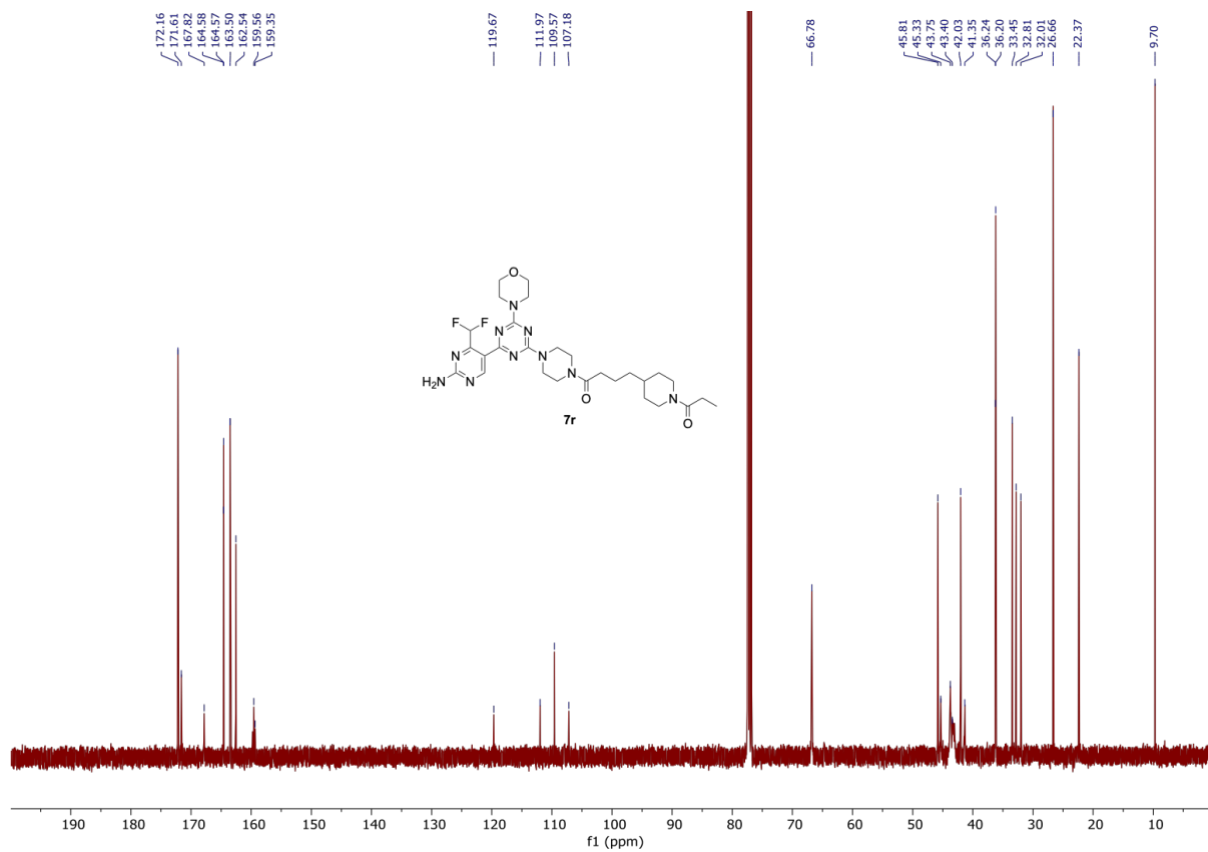

Figure S50. <sup>13</sup>C-NMR of compound 7r (101 MHz) in CDCl<sub>3</sub>.



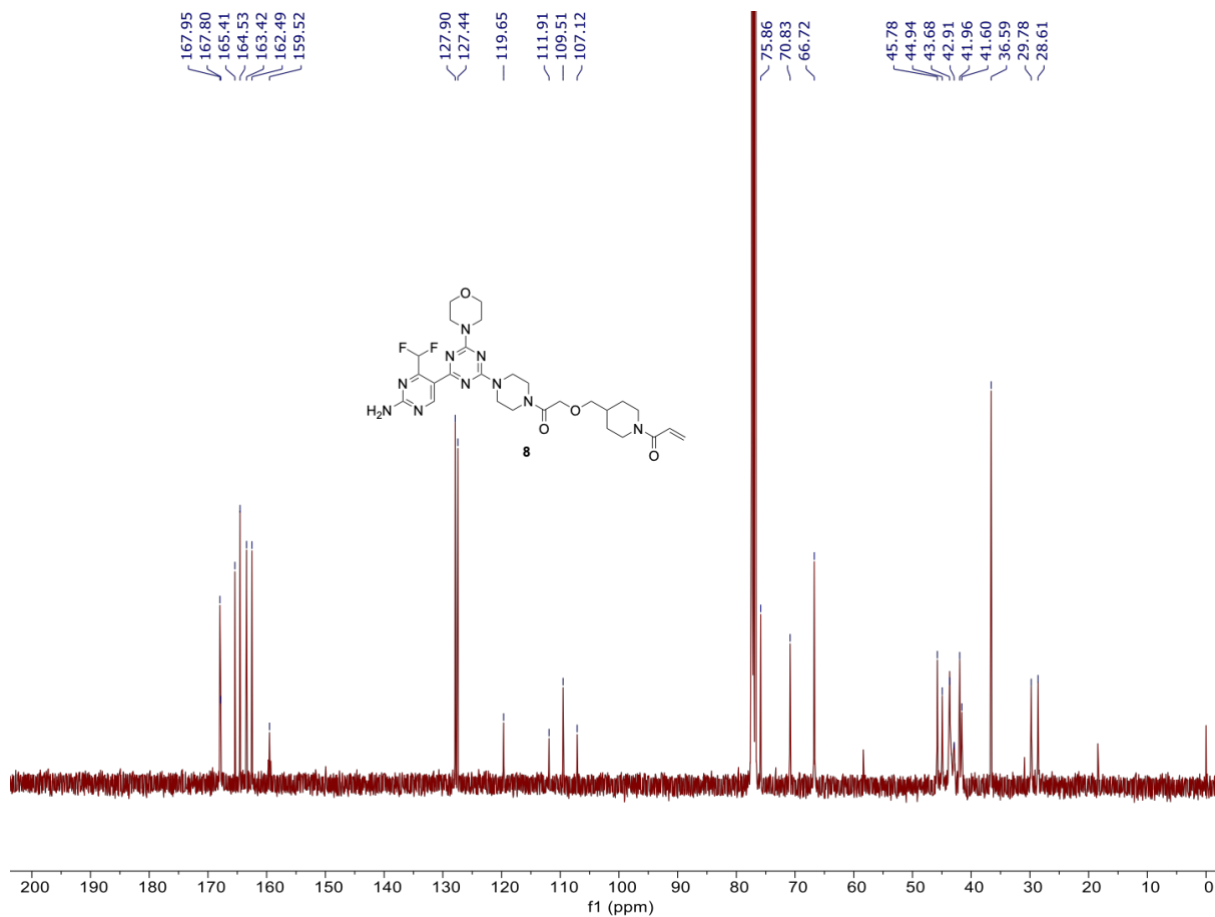

Figure S51. <sup>13</sup>C-NMR of compound **8** (101 MHz) in CDCl<sub>3</sub>.

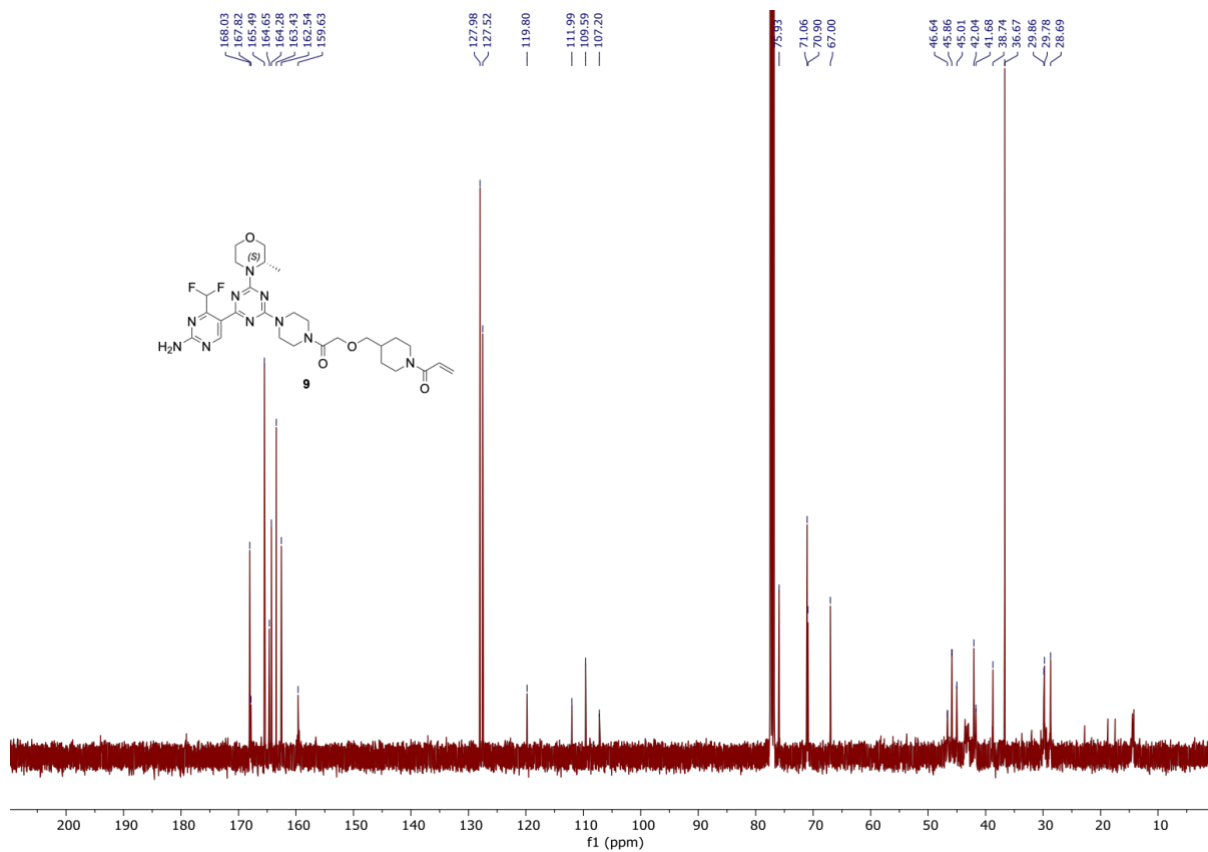

Figure S52. <sup>13</sup>C-NMR of compound **9** (101 MHz) in CDCl<sub>3</sub>.

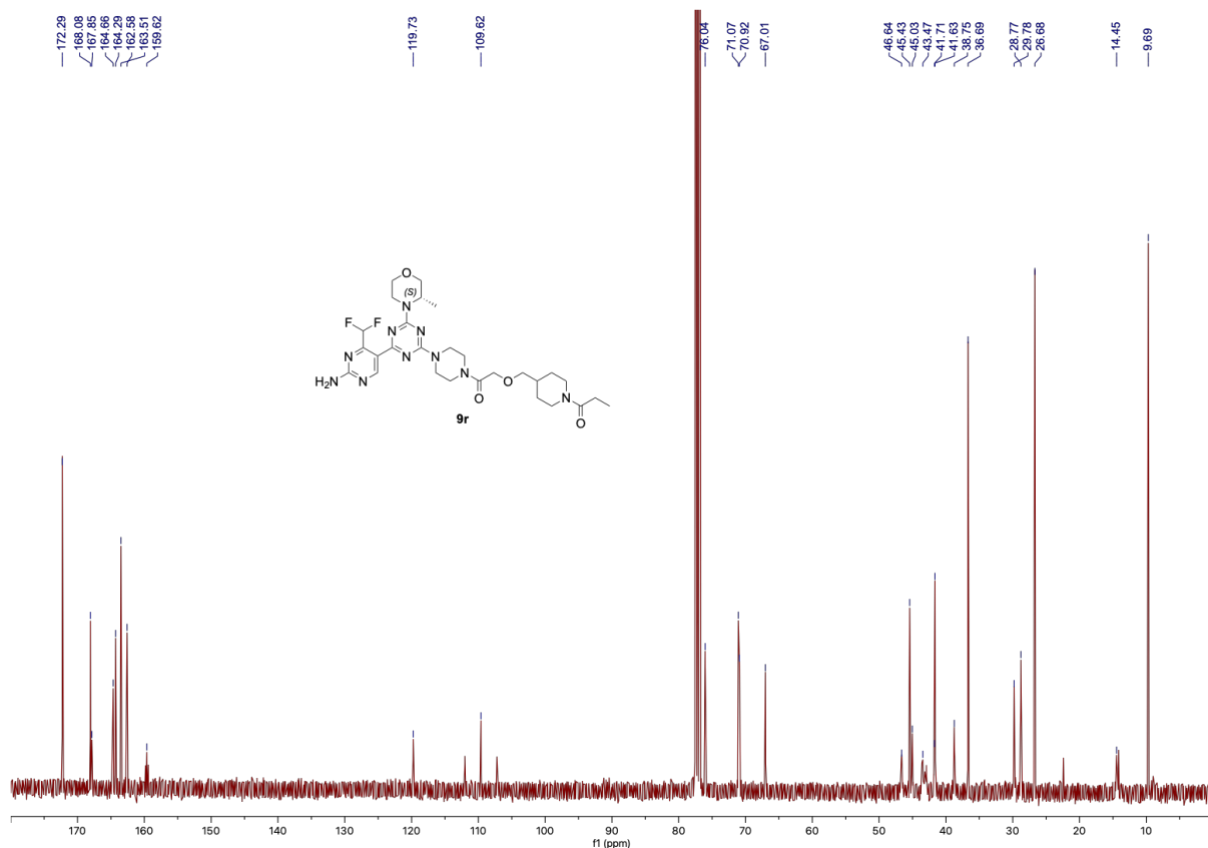

Figure S53.  $^{13}\text{C}$ -NMR of compound **9r** (101 MHz) in  $\text{CDCl}_3$ .

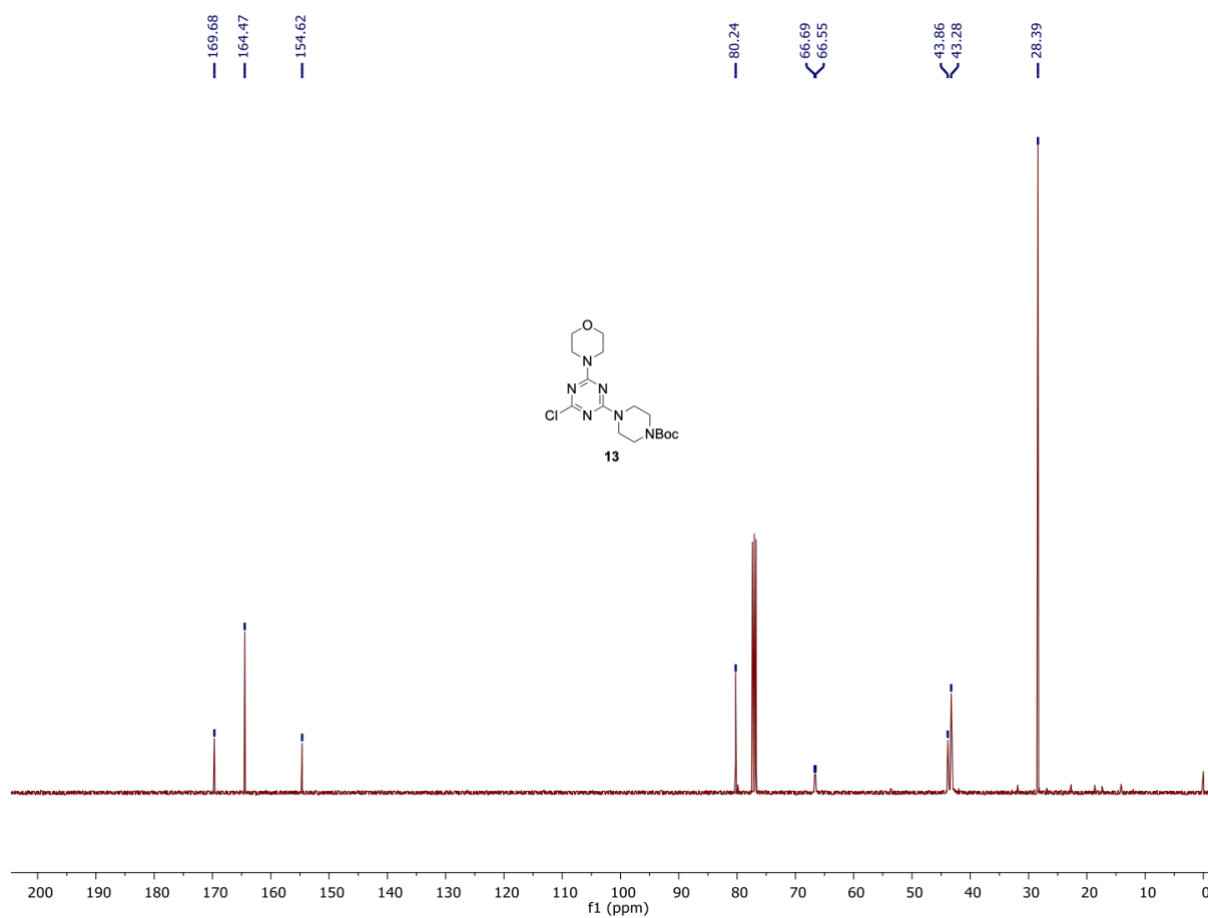

Figure S54.  $^{13}\text{C}$ -NMR of compound **13** (101 MHz) in  $\text{CDCl}_3$ .

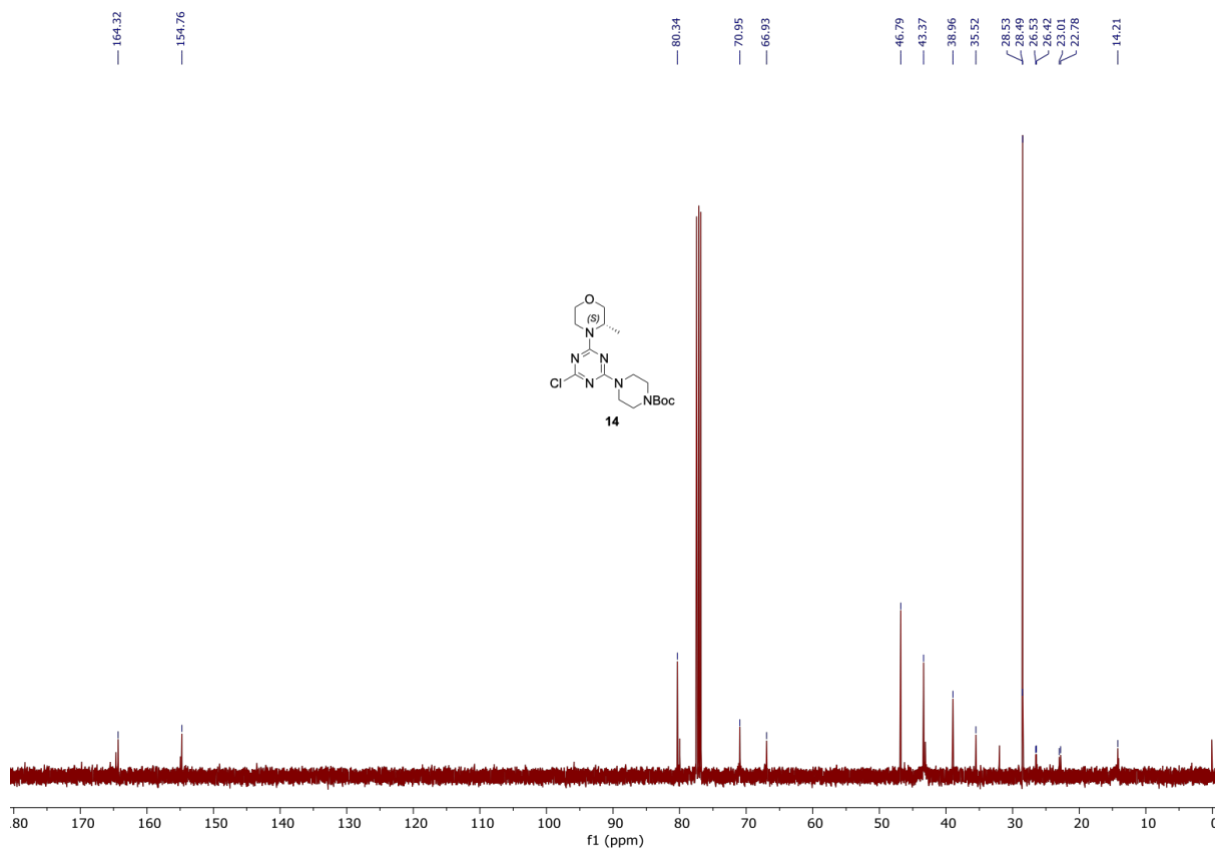

Figure S55. <sup>13</sup>C-NMR of compound **14** (101 MHz) in CDCl<sub>3</sub>.

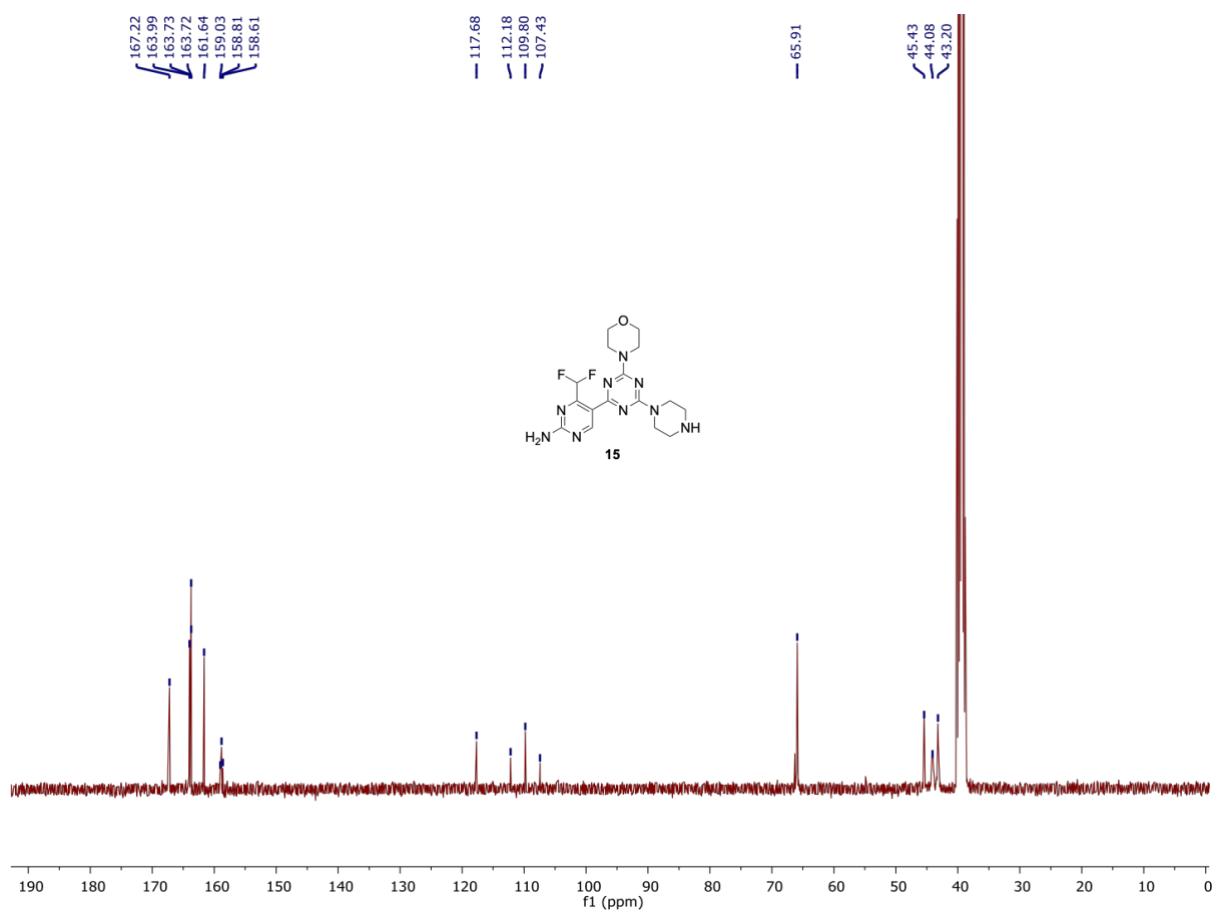

Figure S56. <sup>13</sup>C-NMR of compound **15** (101 MHz) in DMSO-*d*<sub>6</sub>.

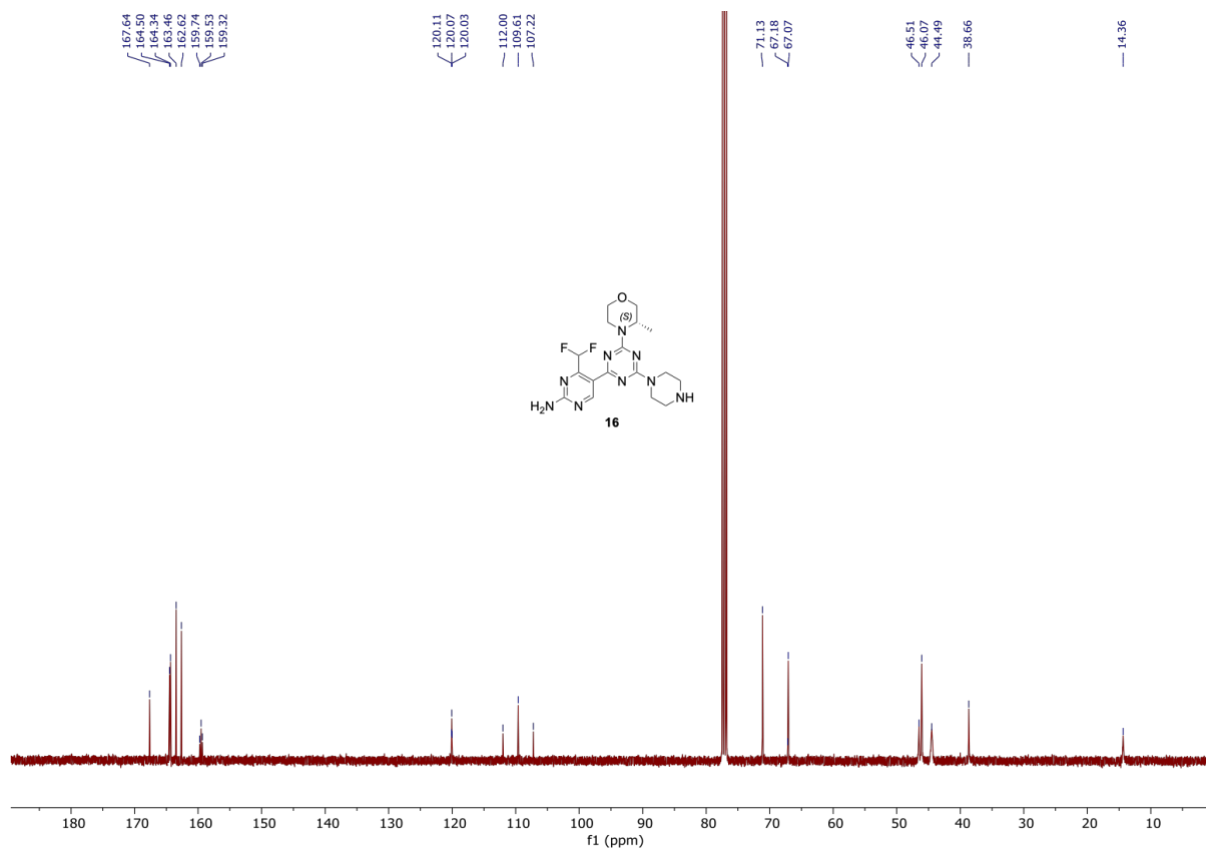

Figure S57. <sup>13</sup>C-NMR of compound **16** (101 MHz) in CDCl<sub>3</sub>.

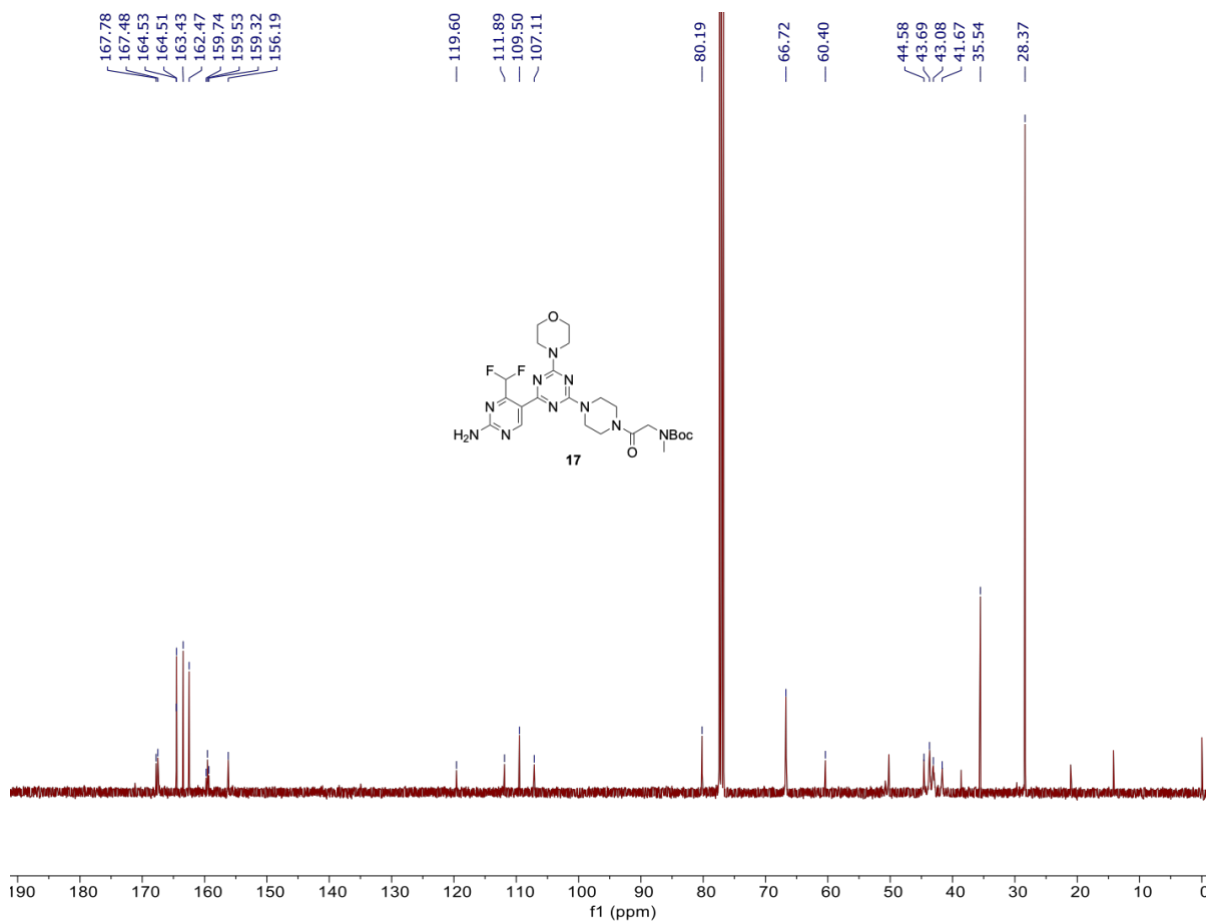

Figure S58. <sup>13</sup>C-NMR of compound **17** (101 MHz) in CDCl<sub>3</sub>.

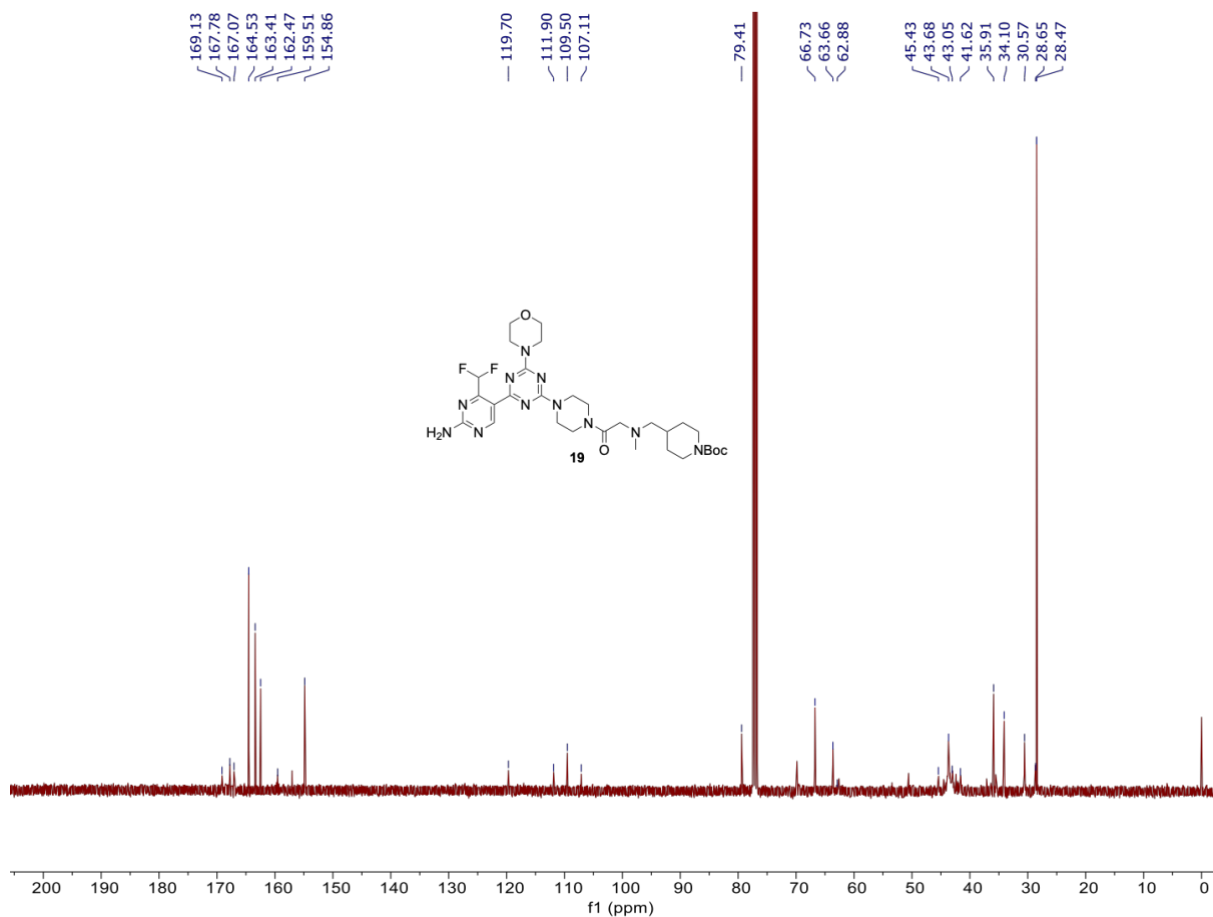

Figure S59. <sup>13</sup>C-NMR of compound **19** (101 MHz) in CDCl<sub>3</sub>.

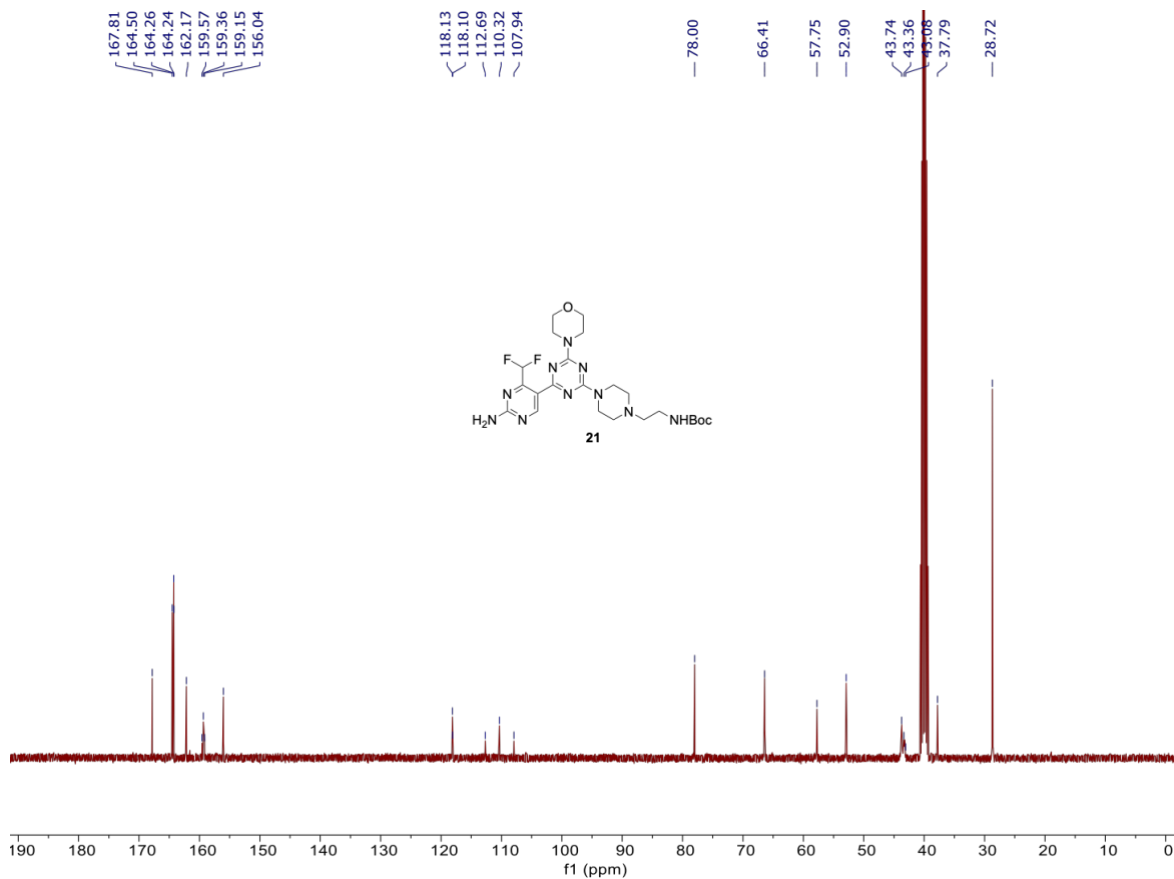

Figure S60. <sup>13</sup>C-NMR of compound **21** (101 MHz) in CDCl<sub>3</sub>.

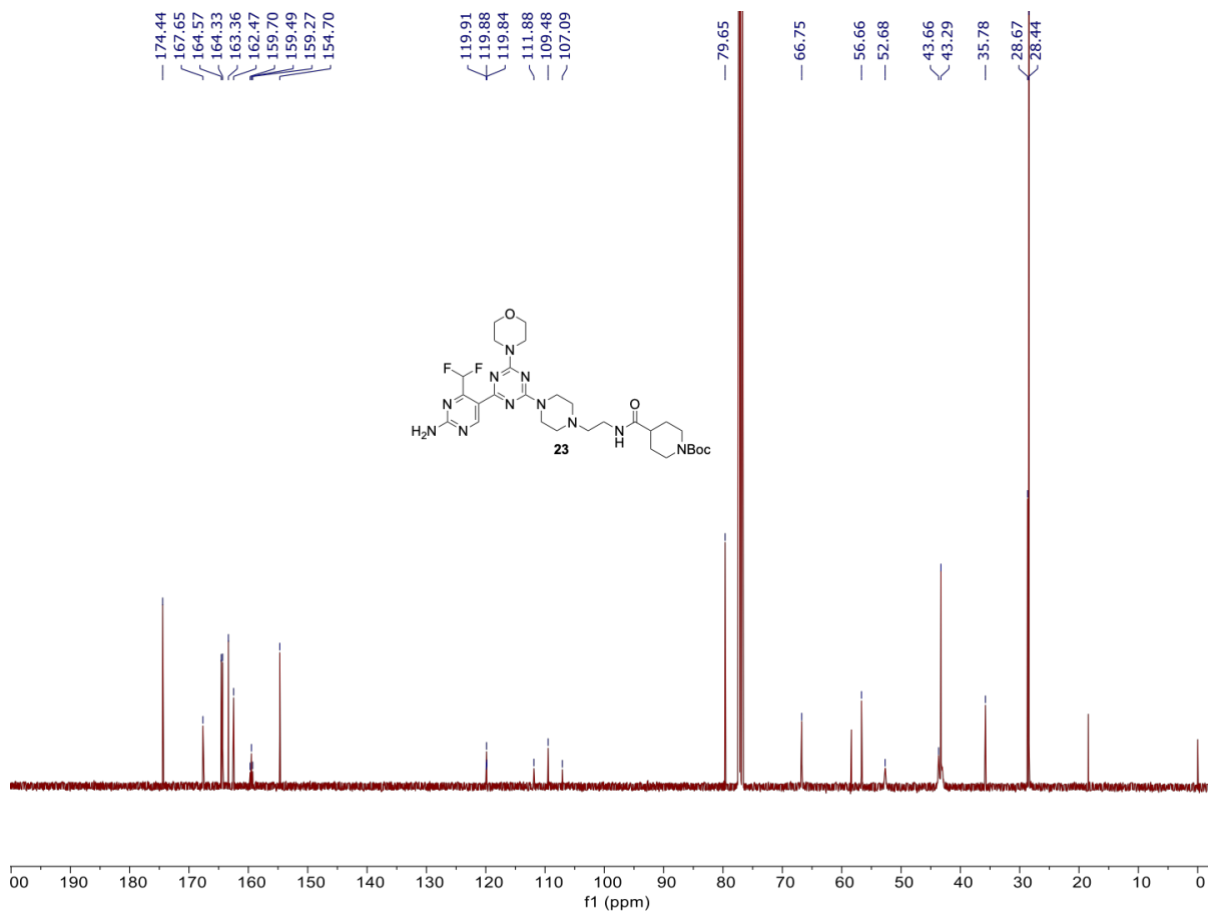

Figure S61. <sup>13</sup>C-NMR of compound **23** (101 MHz) in CDCl<sub>3</sub>.

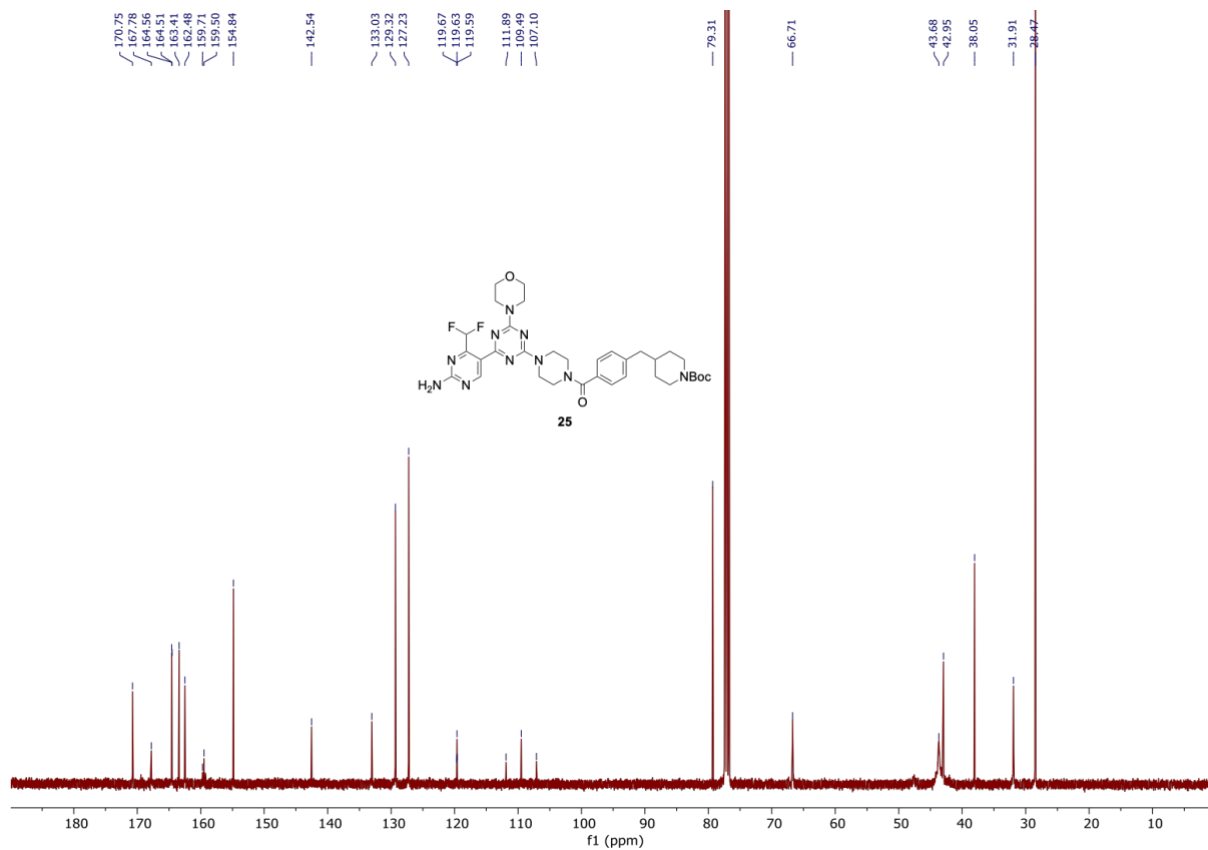

Figure S62. <sup>13</sup>C-NMR of compound **25** (101 MHz) in CDCl<sub>3</sub>.

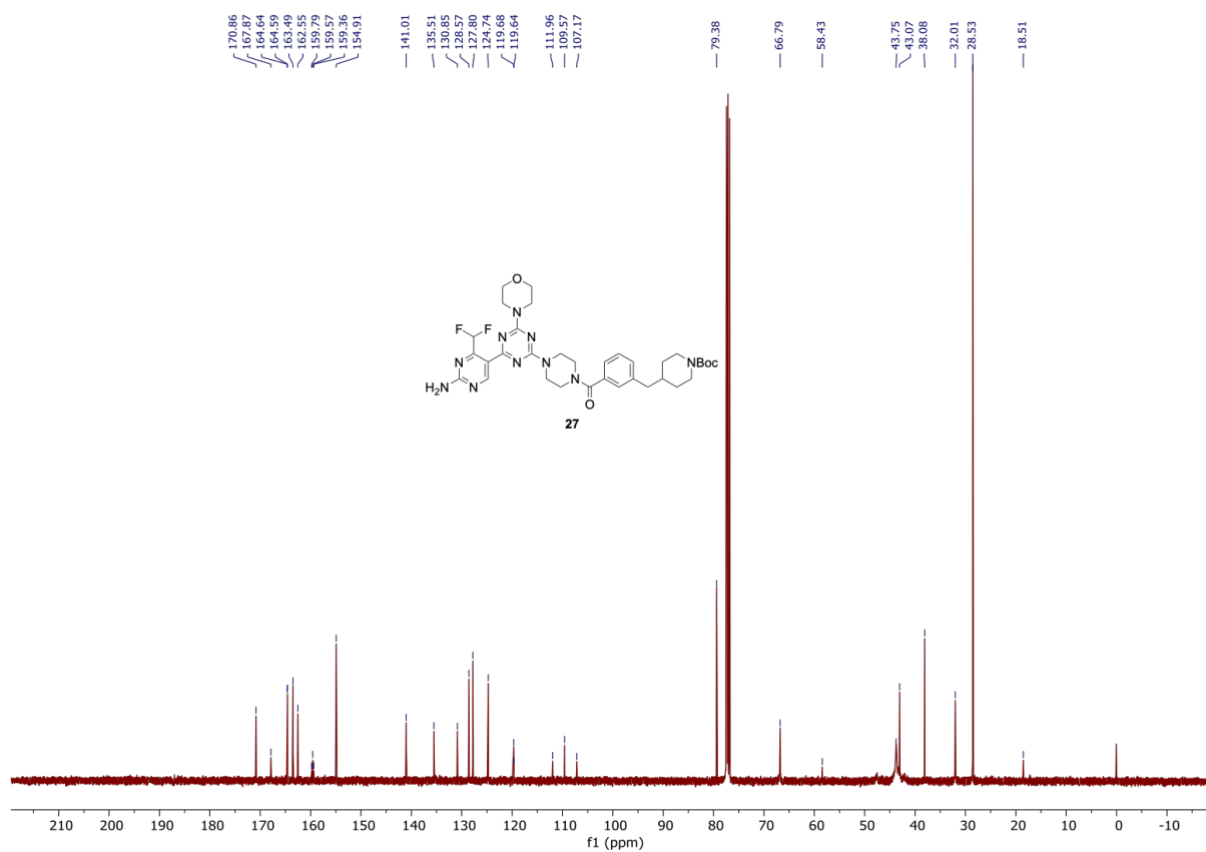

Figure S63. <sup>13</sup>C-NMR of compound **27** (101 MHz) in CDCl<sub>3</sub>.

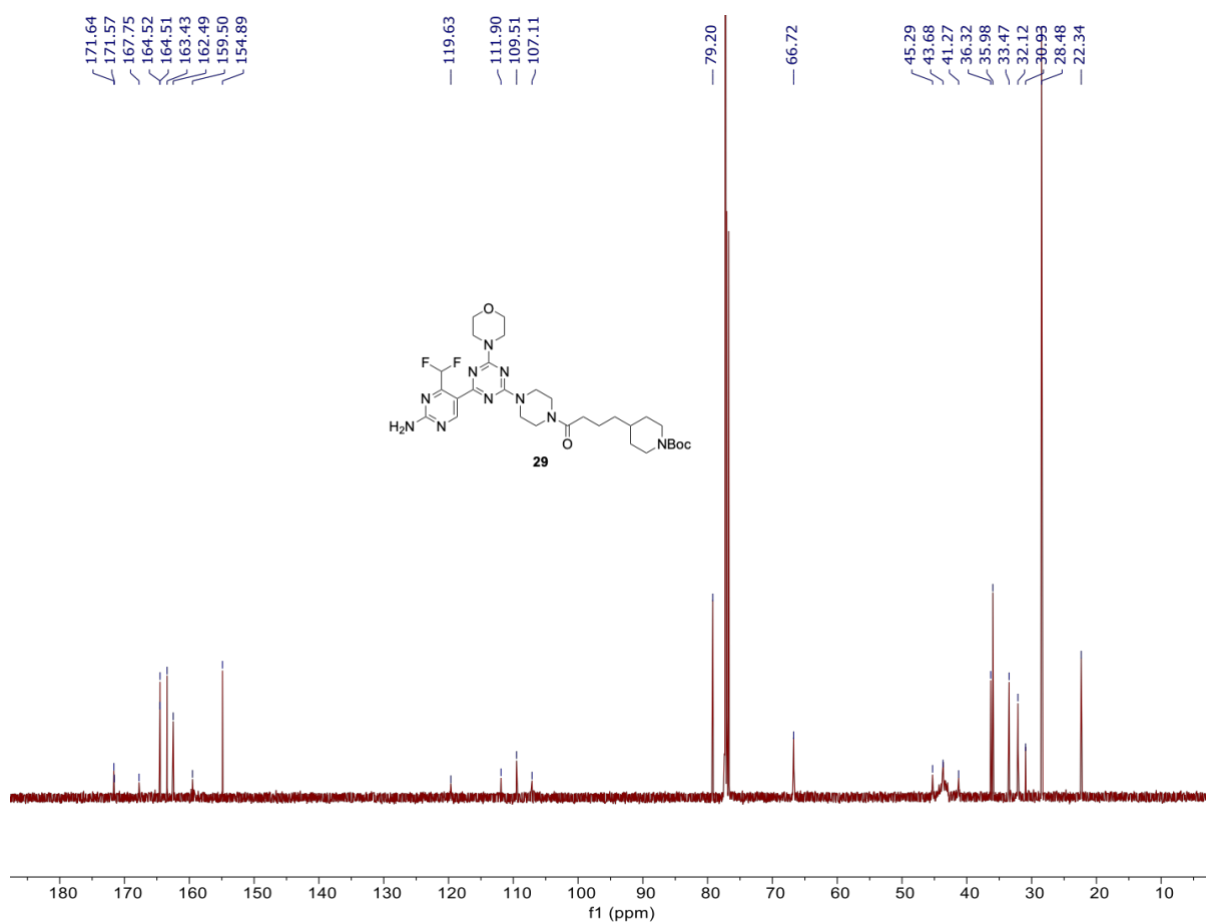

Figure S64. <sup>13</sup>C-NMR of compound **29** (101 MHz) in CDCl<sub>3</sub>.

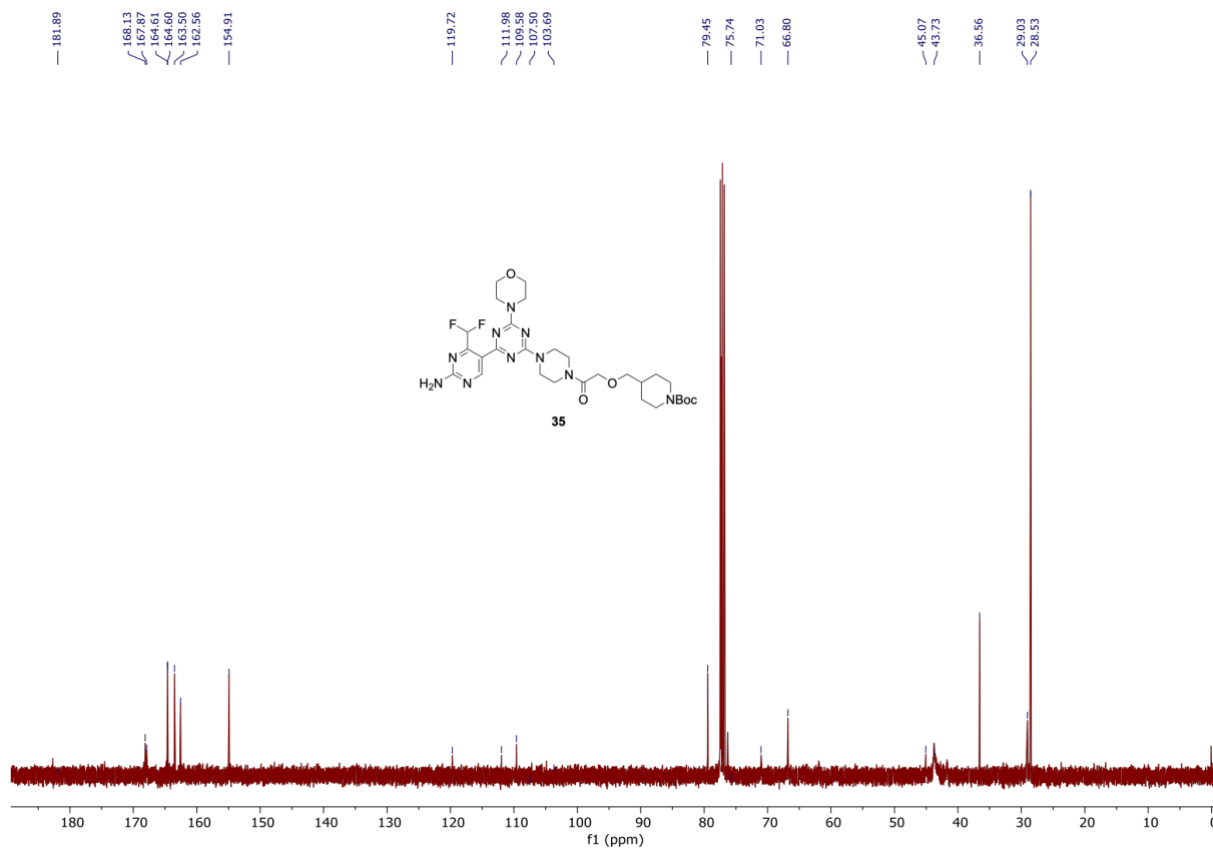

Figure S65.  $^{13}\text{C}$ -NMR of compound **35** (101 MHz) in  $\text{CDCl}_3$ .

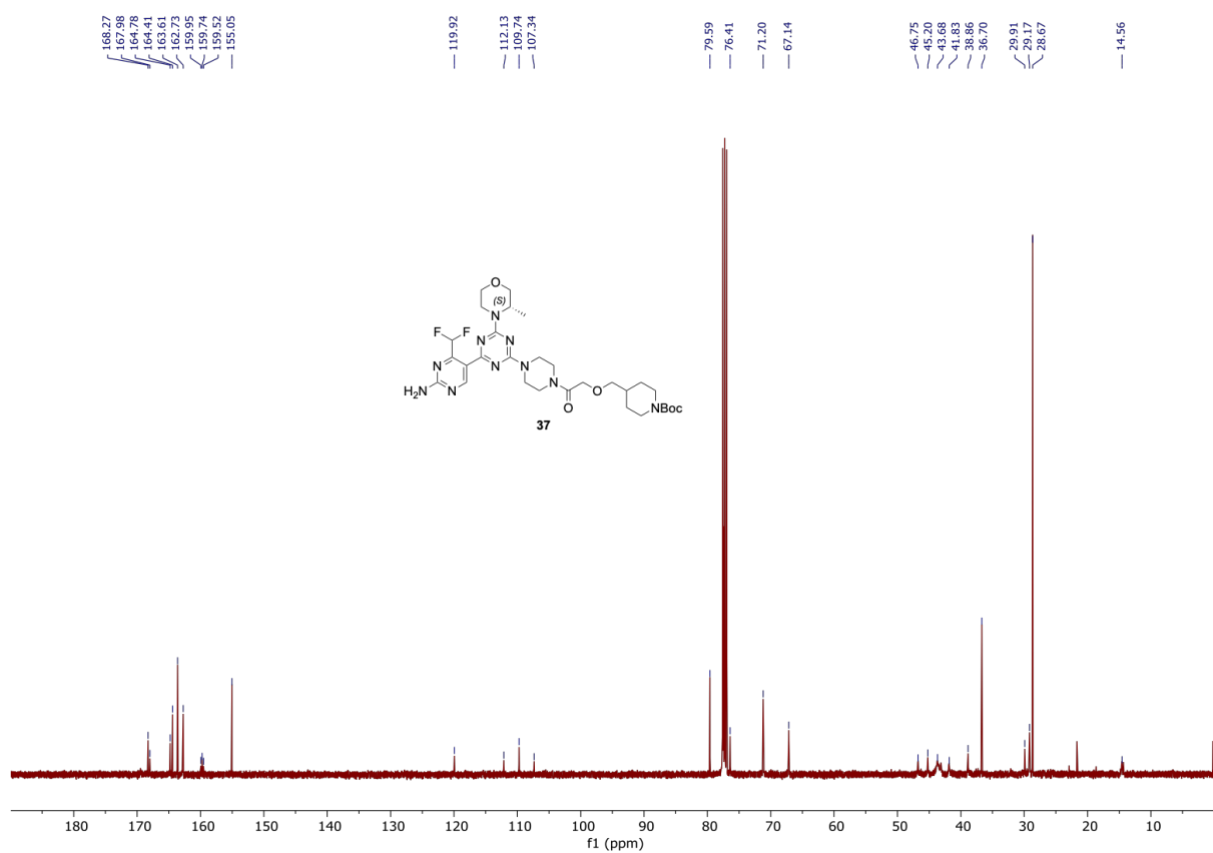

Figure S66.  $^{13}\text{C}$ -NMR of compound **37** (101 MHz) in  $\text{CDCl}_3$ .



## MS data

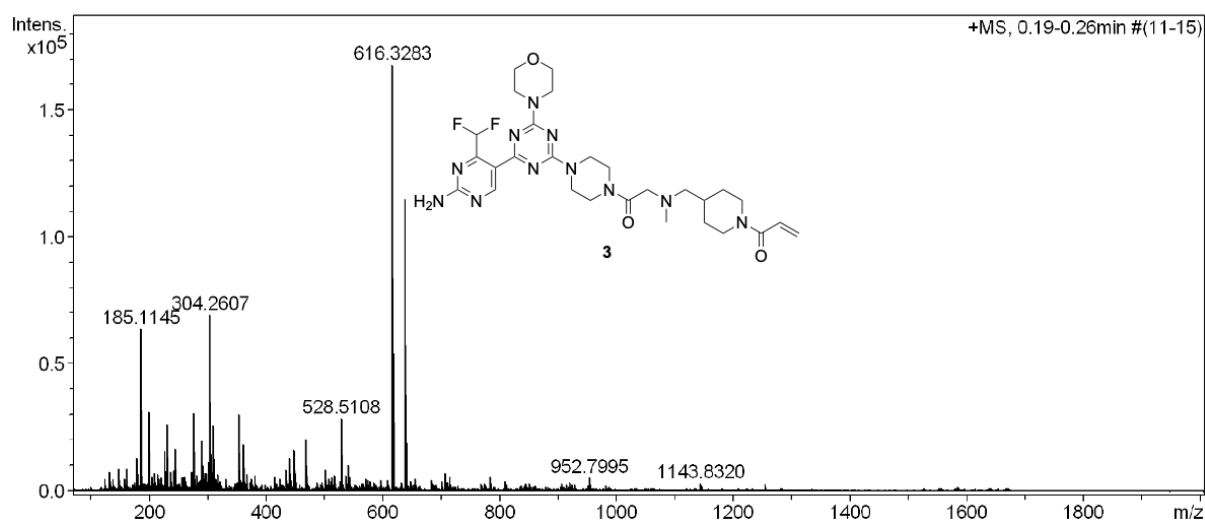

Figure S67. HRMS of compound 3.

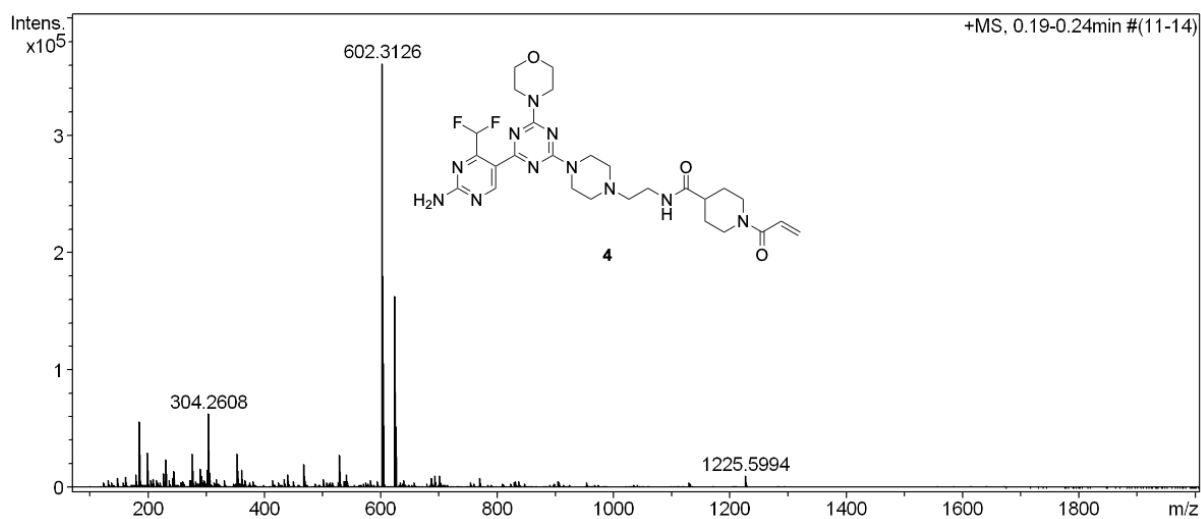

Figure S68. HRMS of compound 4.

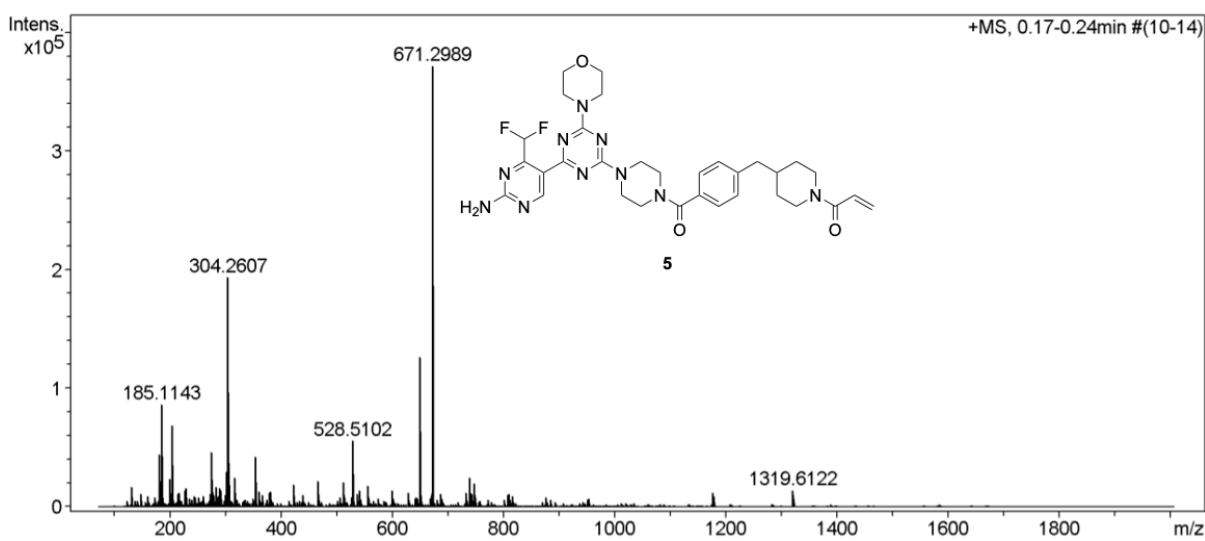

Figure S69. HRMS of compound 5.

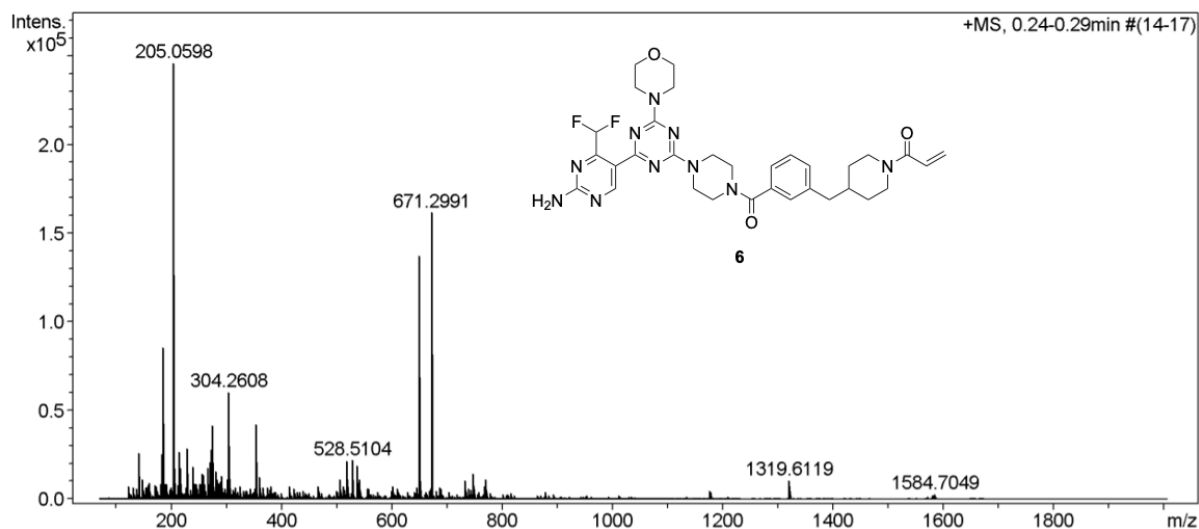

Figure S70. HRMS of compound **6**.

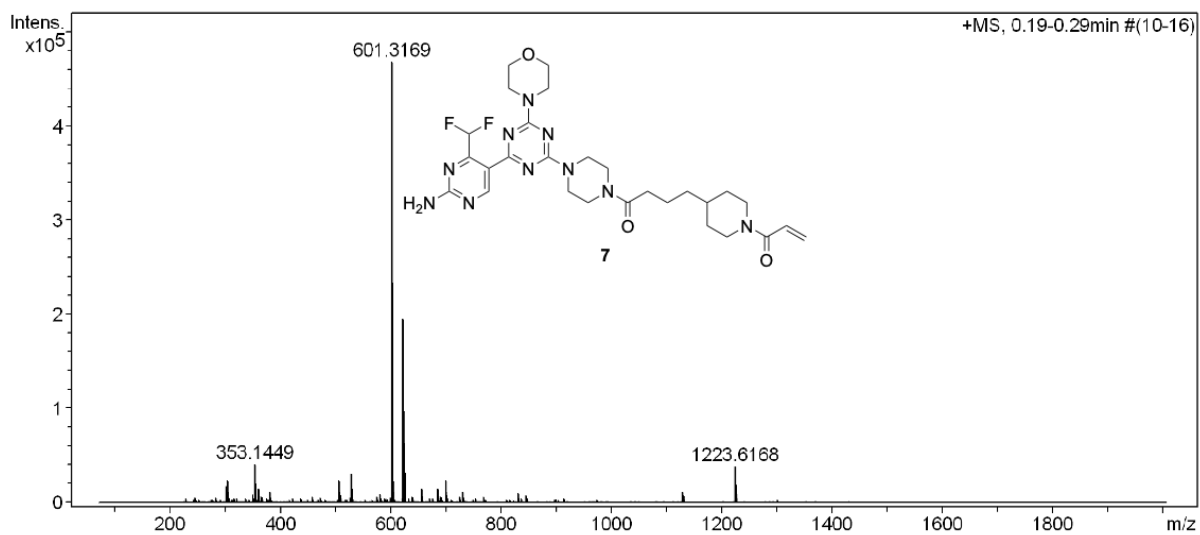

Figure S71. HRMS of compound **7**.

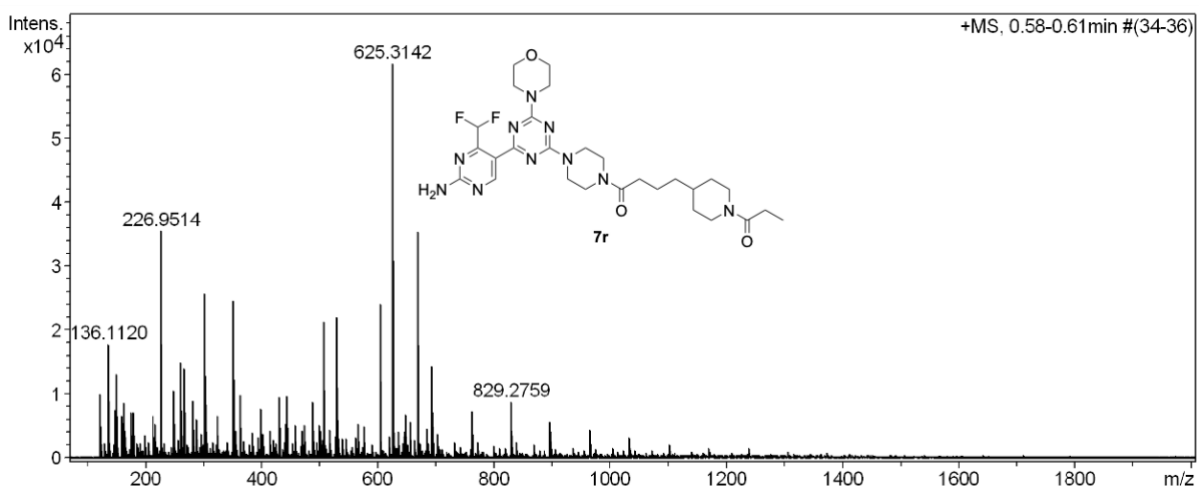

Figure S72. HRMS of compound **7r**.

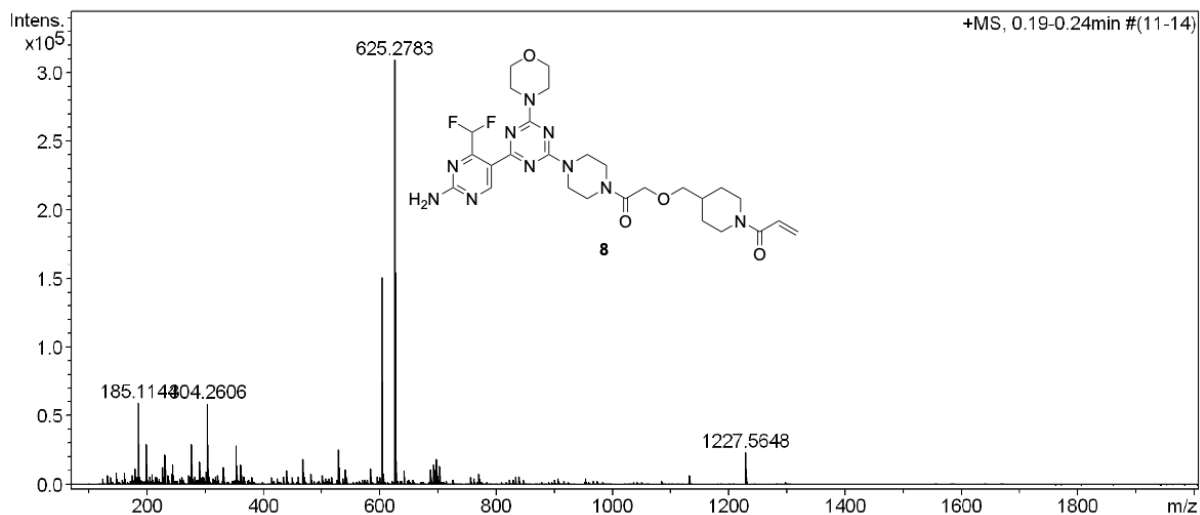

Figure S73. HRMS of compound **8**.

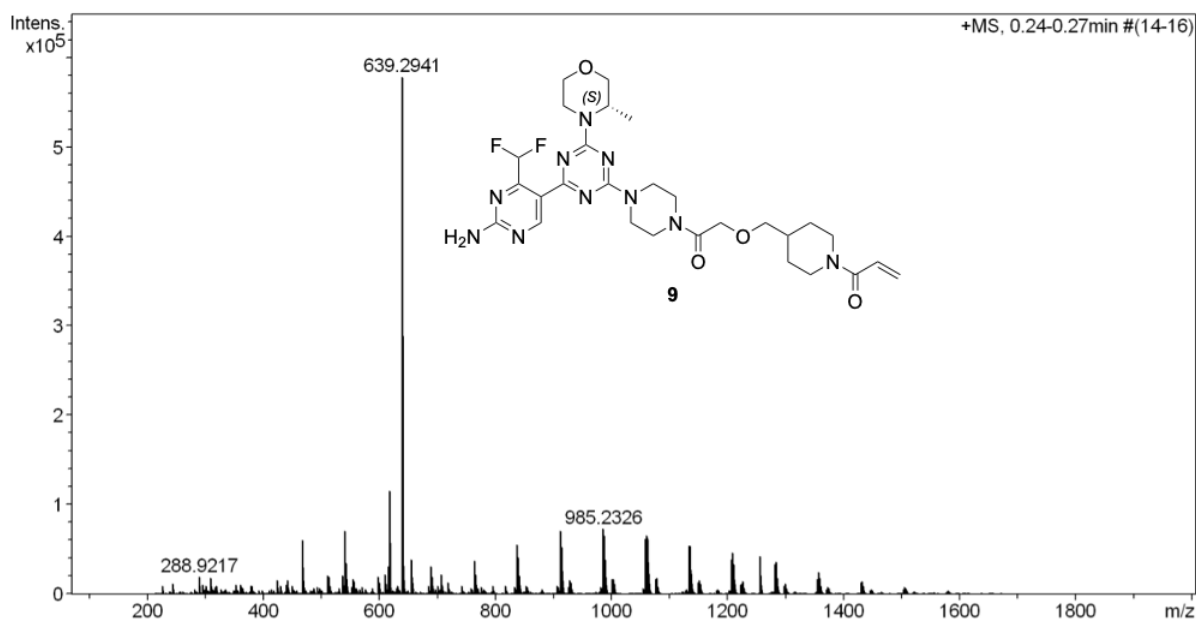

Figure S74. HRMS of compound **9**.

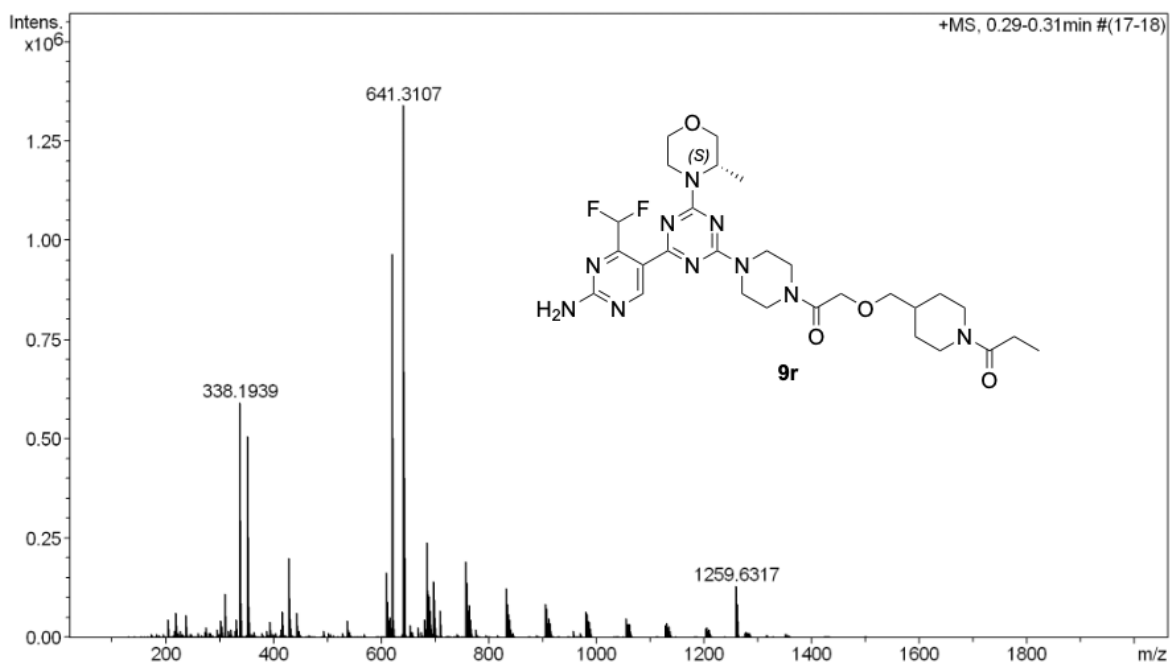

Figure S75. HRMS of compound **9r**.

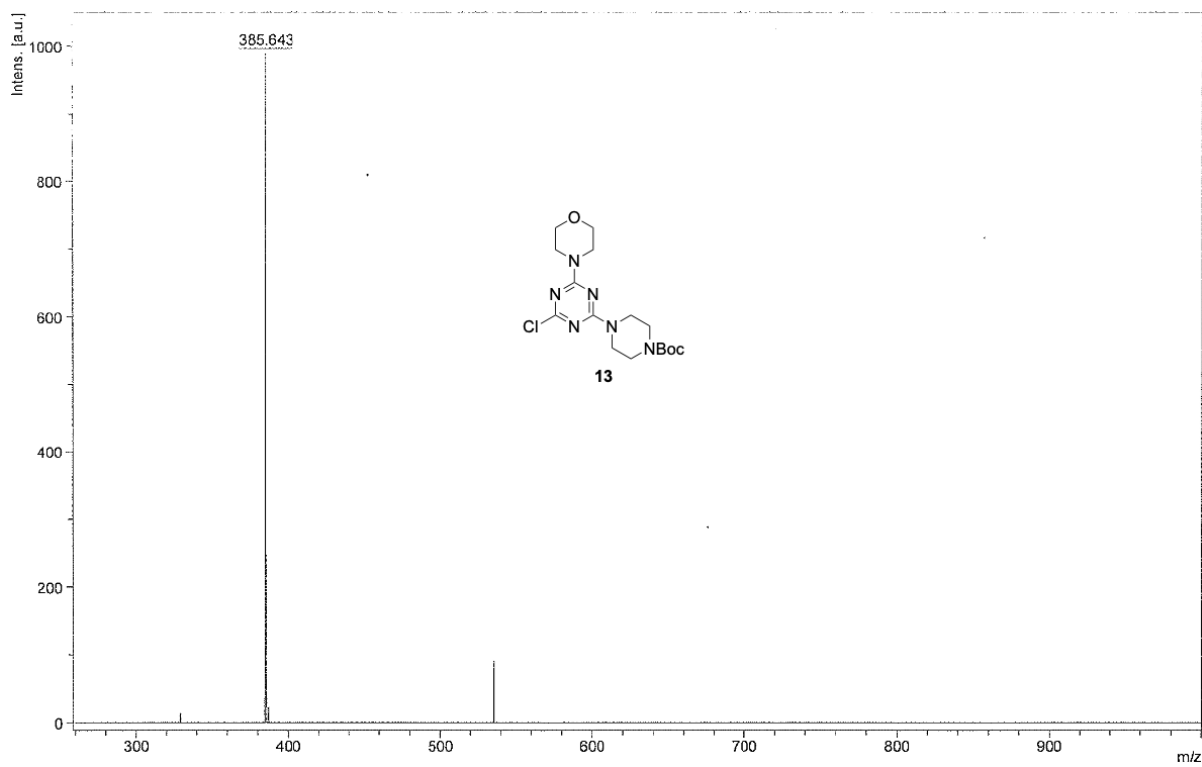

Figure S76. MALDI-MS of compound **13**.

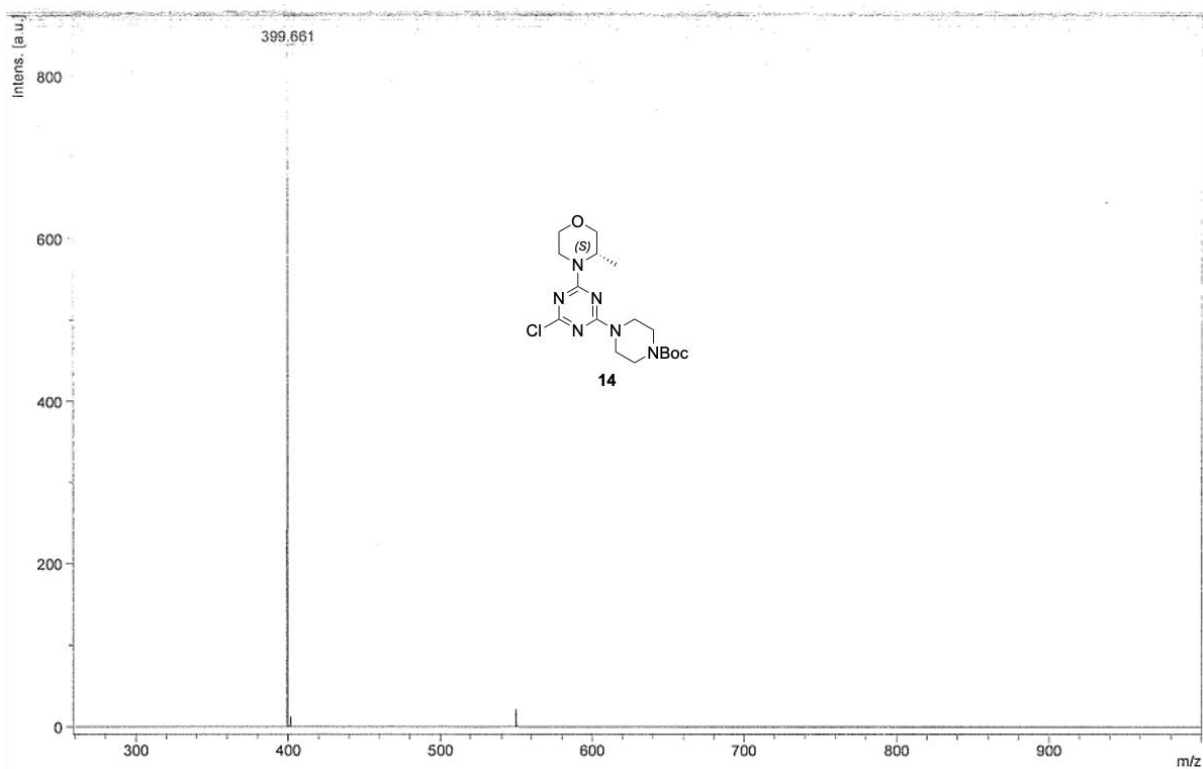

Figure S77. MALDI-MS of compound 14.

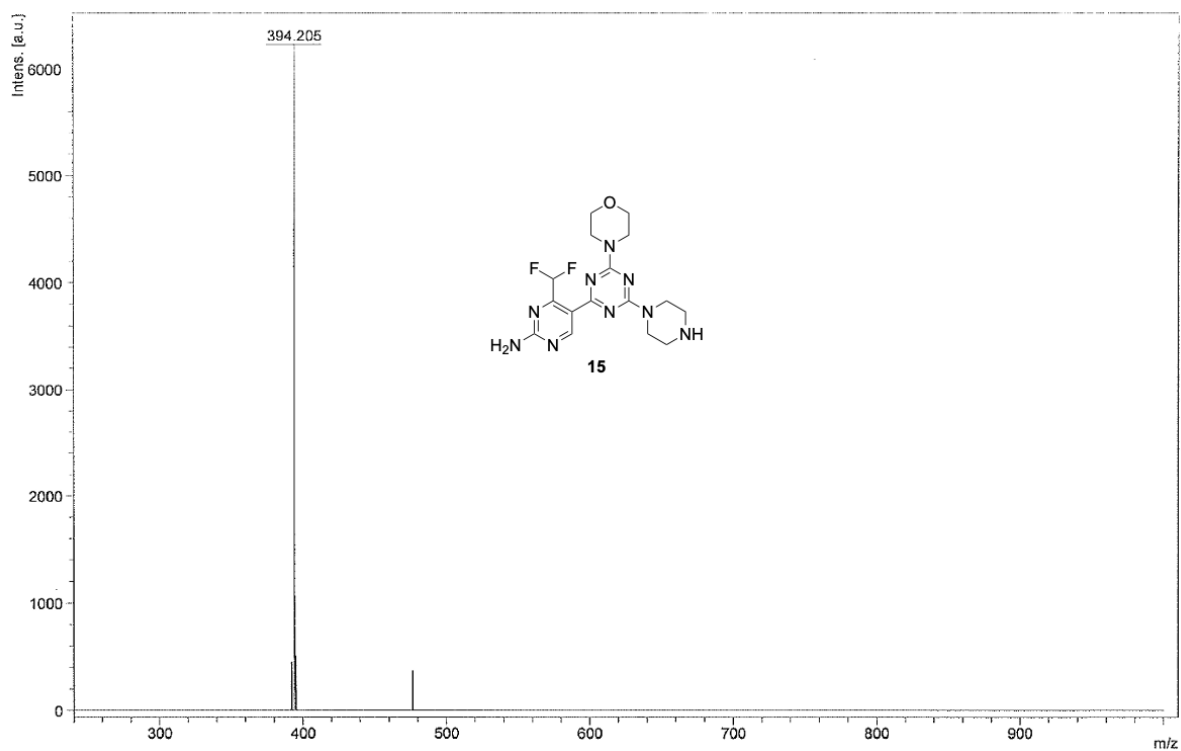

Figure S78. MALDI-MS of compound 15.

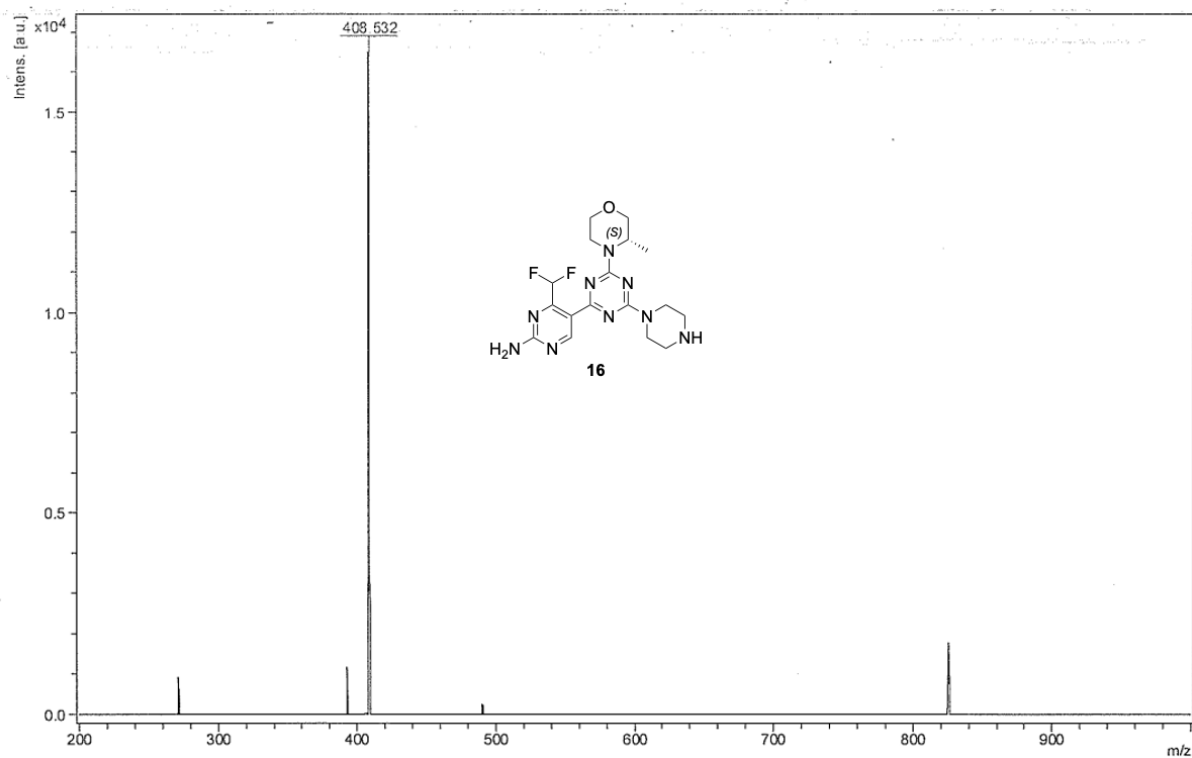

Figure S79. MALDI-MS of compound **16**.

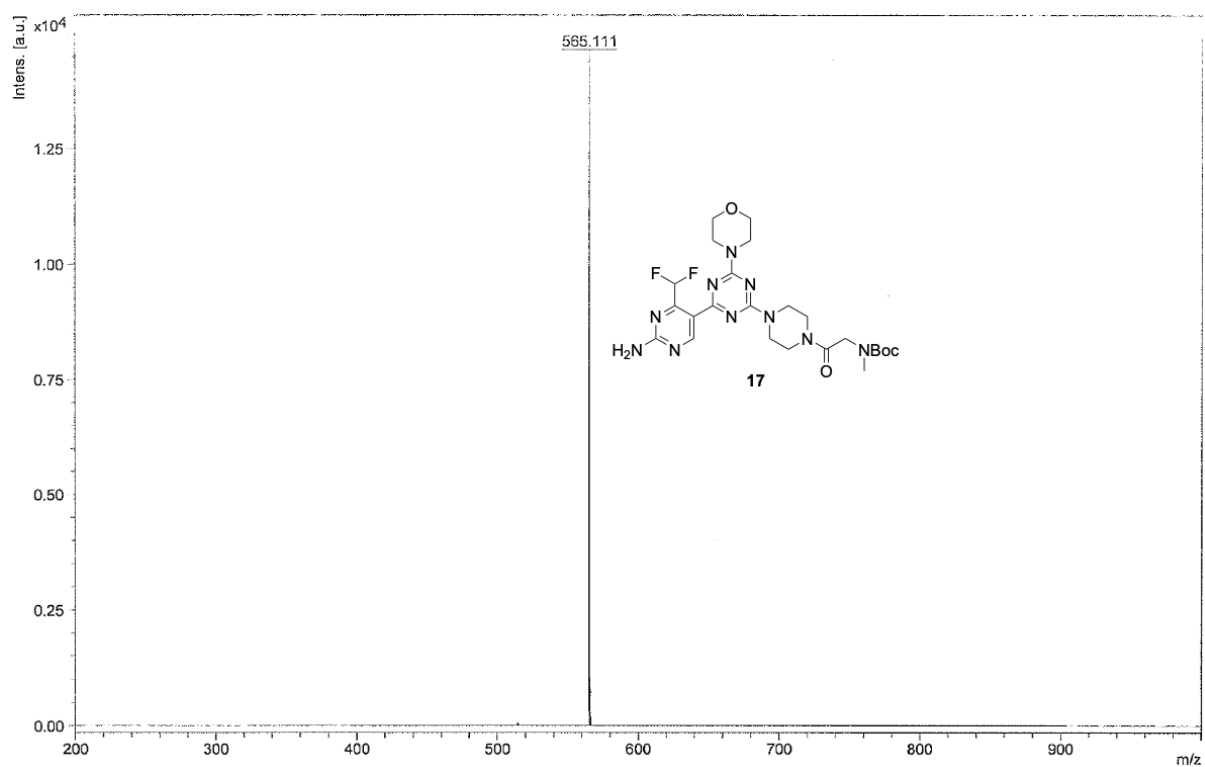

Figure S80. MALDI-MS of compound **17**.

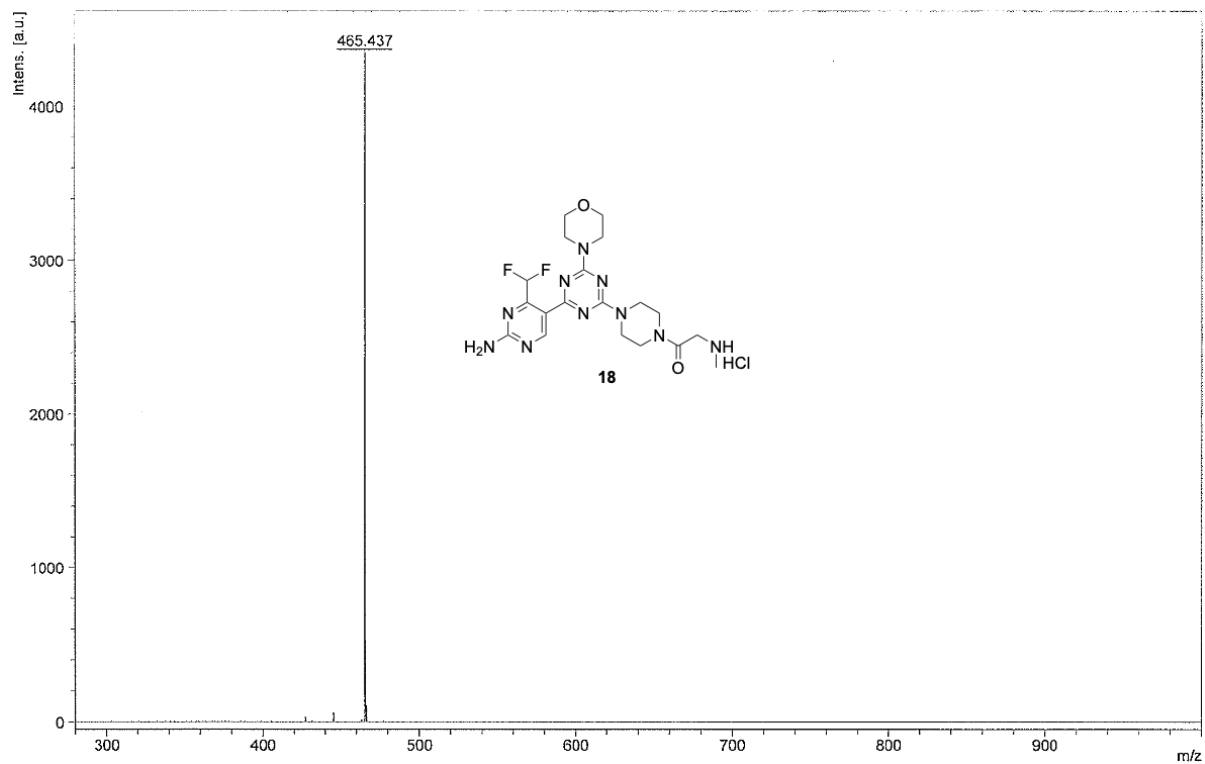

Figure S81. MALDI-MS of compound 18.

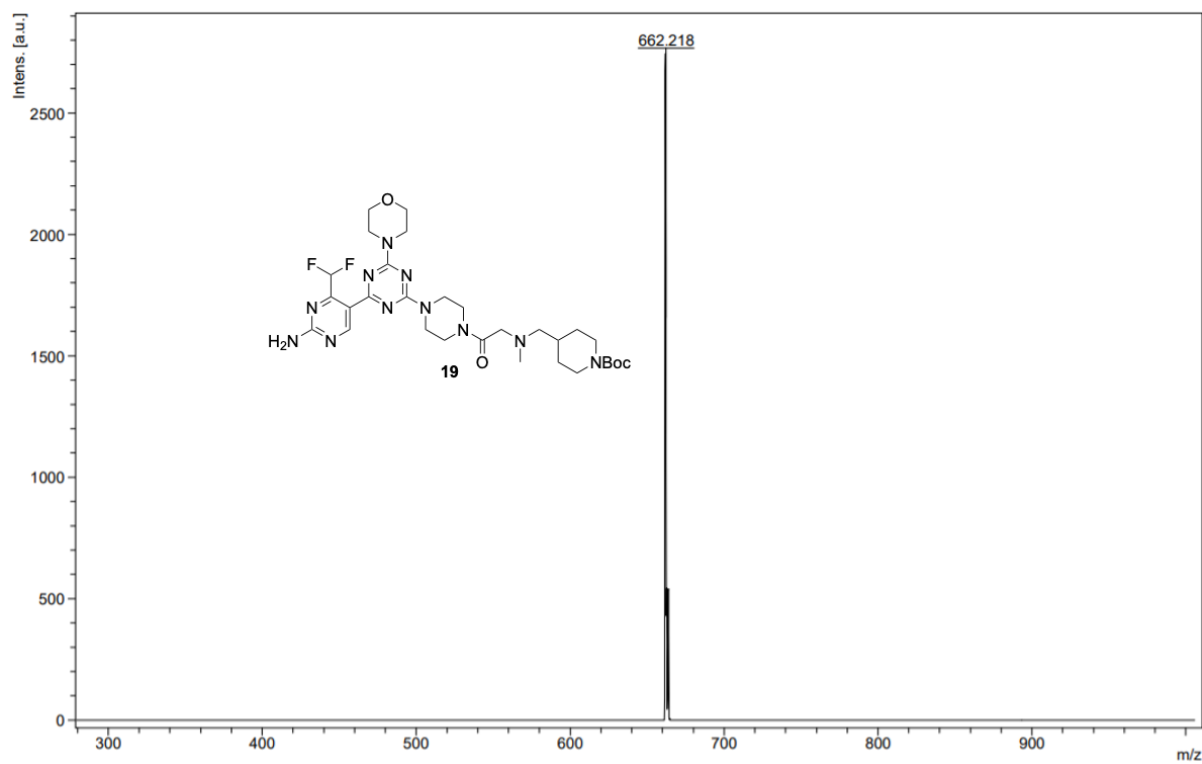

Figure S82. MALDI-MS of compound 19.

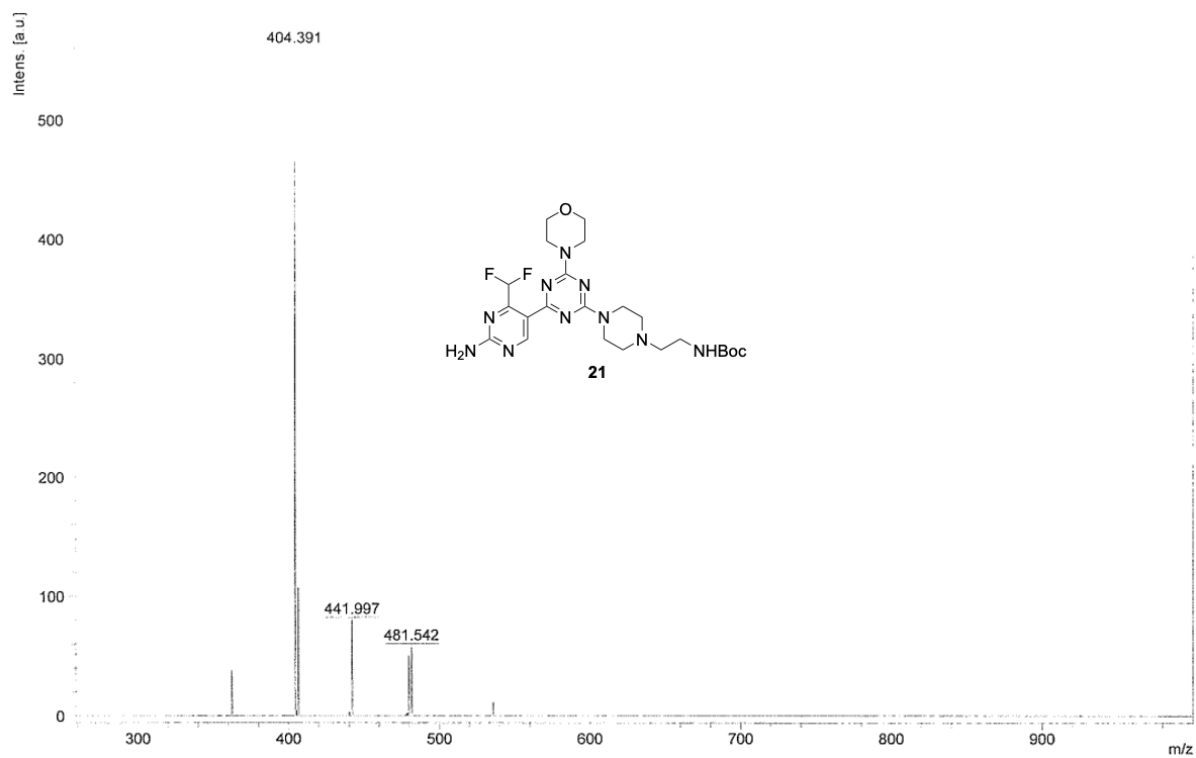

Figure S83. MALDI-MS of compound **21**.

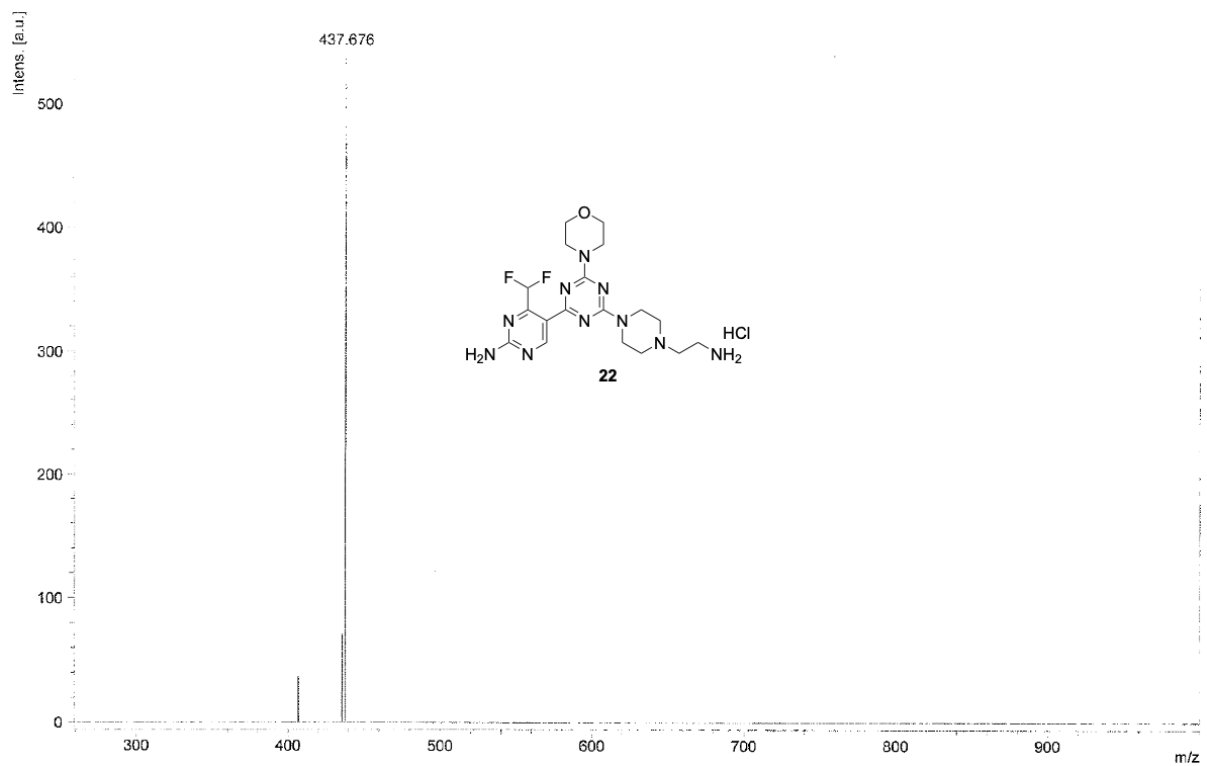

Figure S84. MALDI-MS of compound **22**.



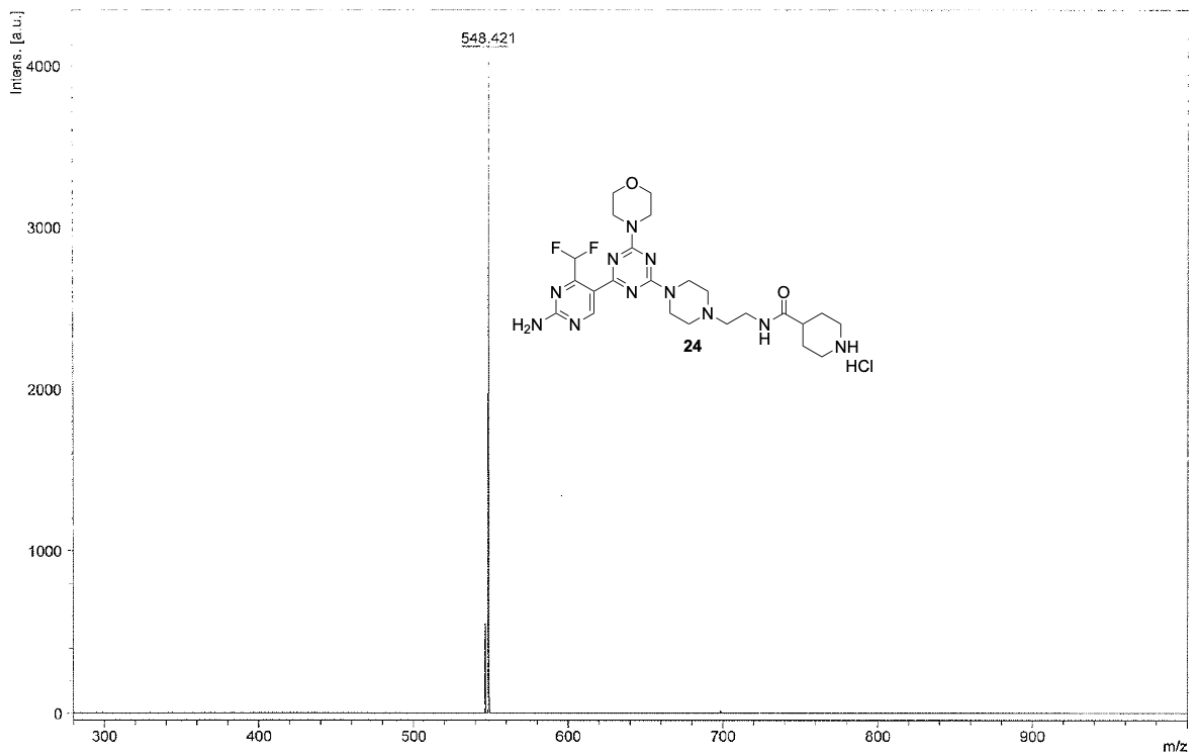

Figure S85. MALDI-MS of compound **24**.

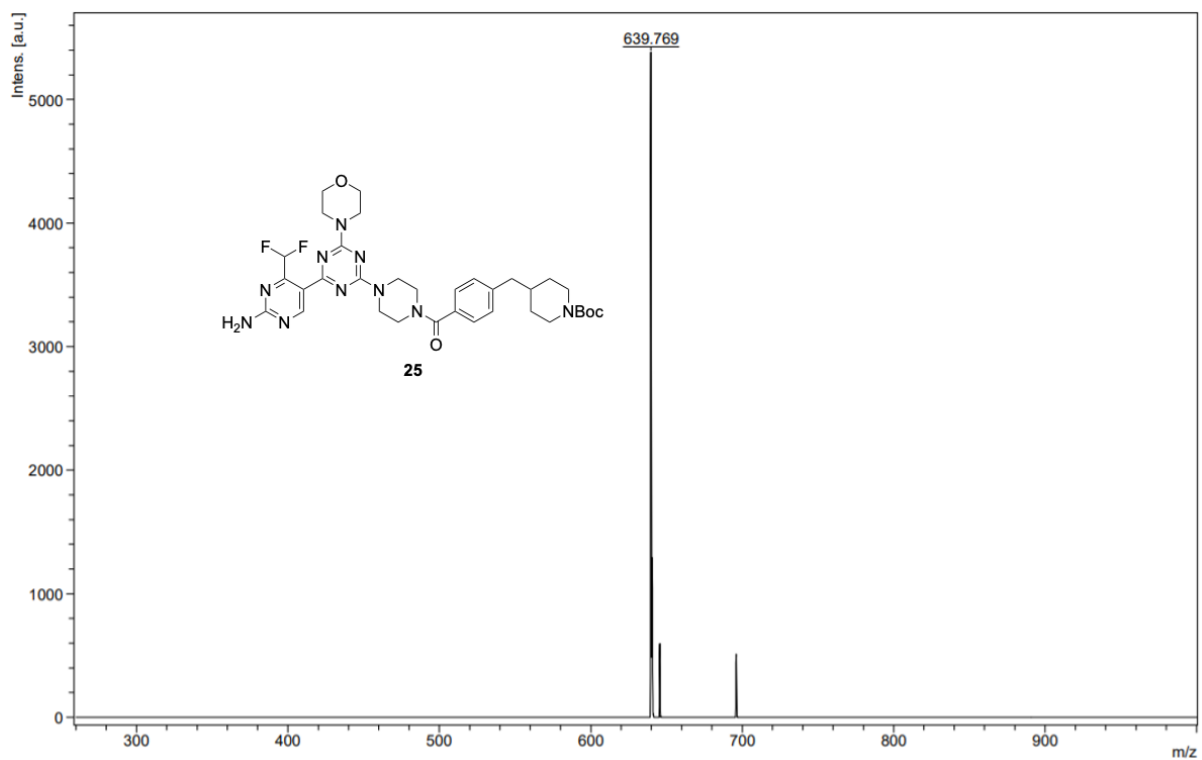

Figure S86. MALDI-MS of compound **25**.

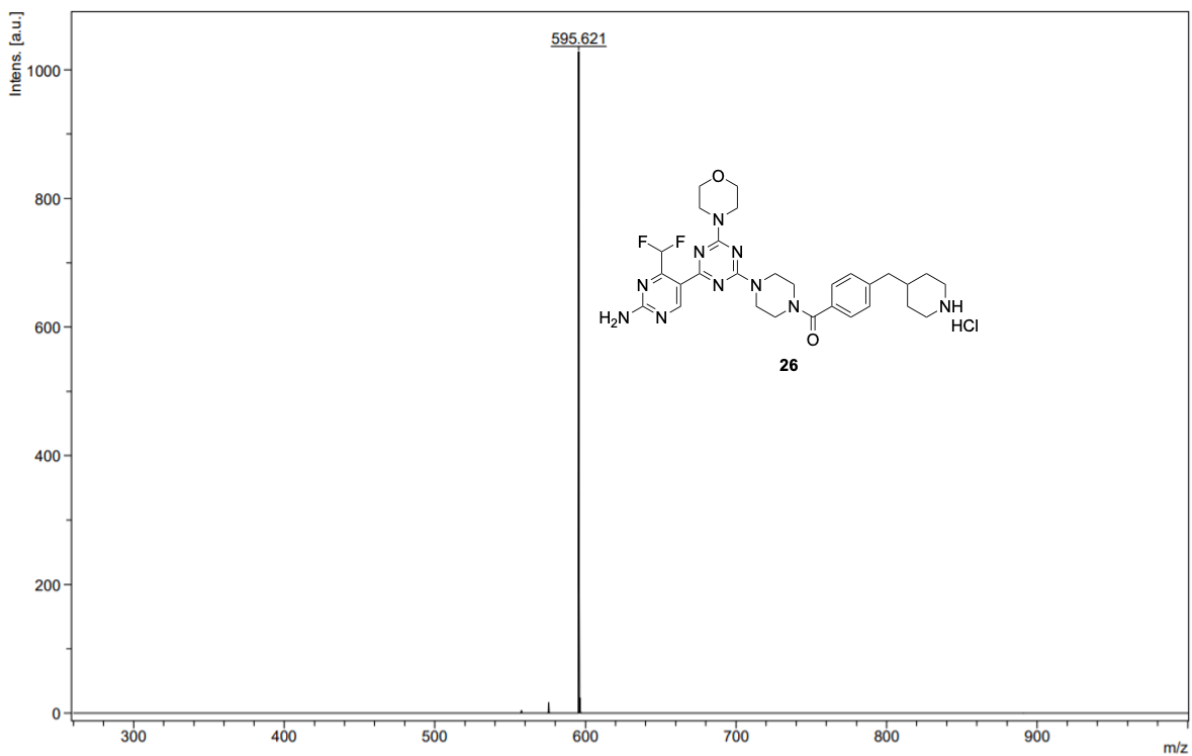

Figure S87. MALDI-MS of compound 26.

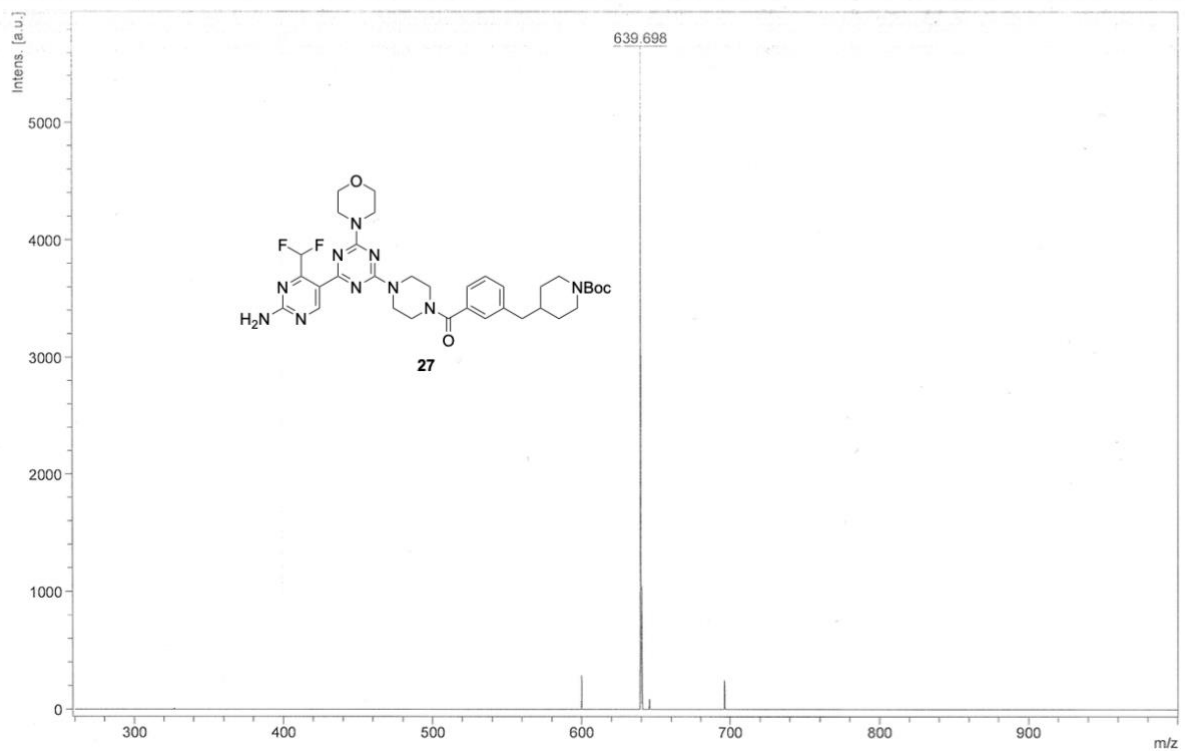

Figure S88. MALDI-MS of compound 27.

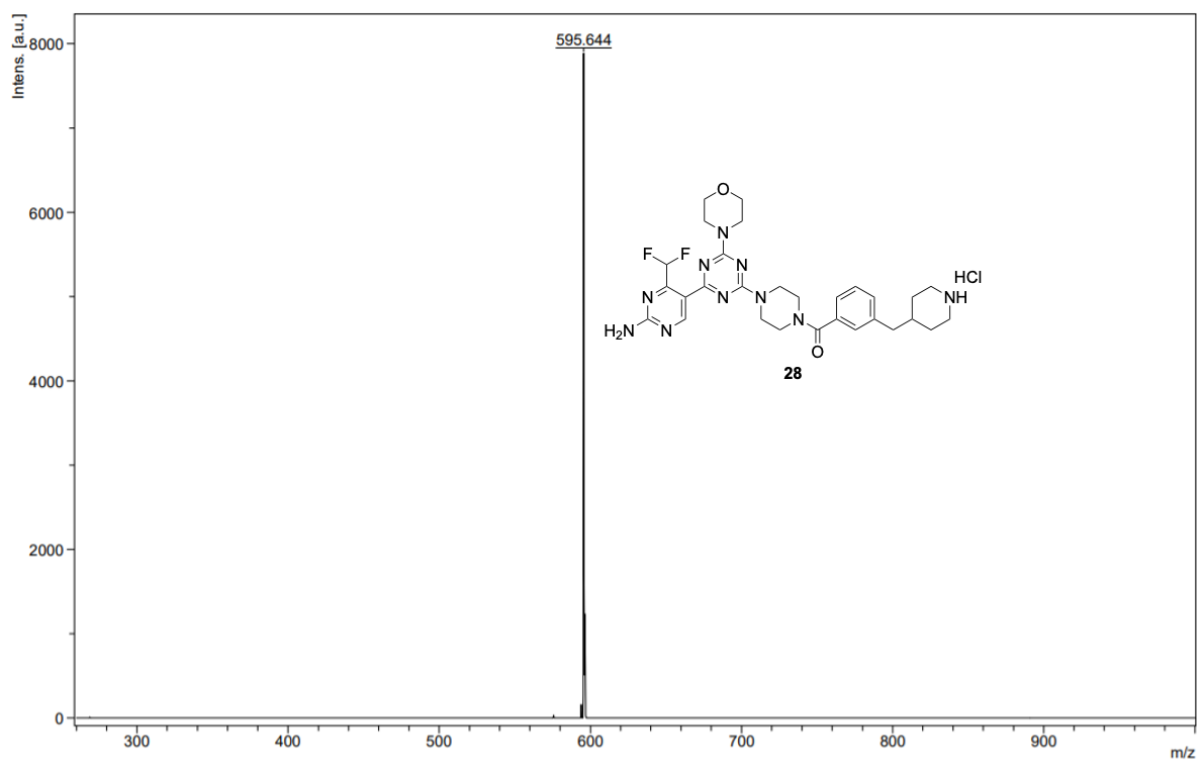

Figure S89. MALDI-MS of compound **28**.

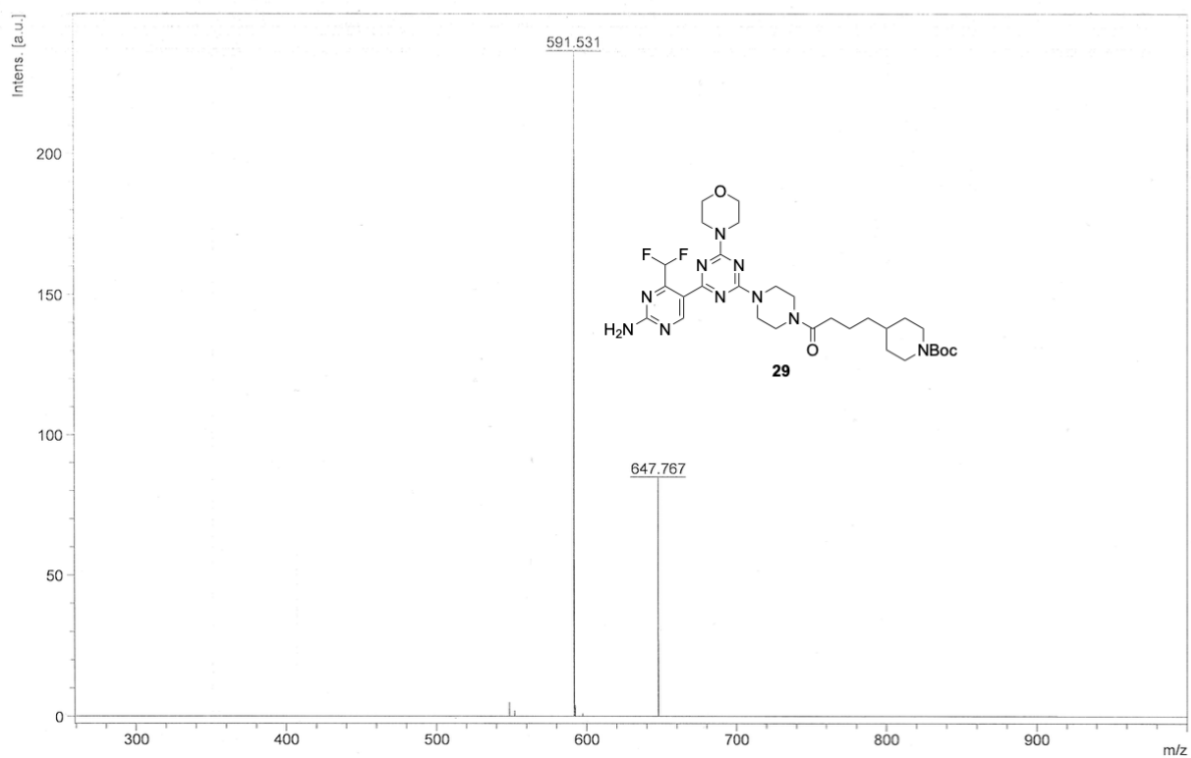

Figure S90. MALDI-MS of compound **29**.

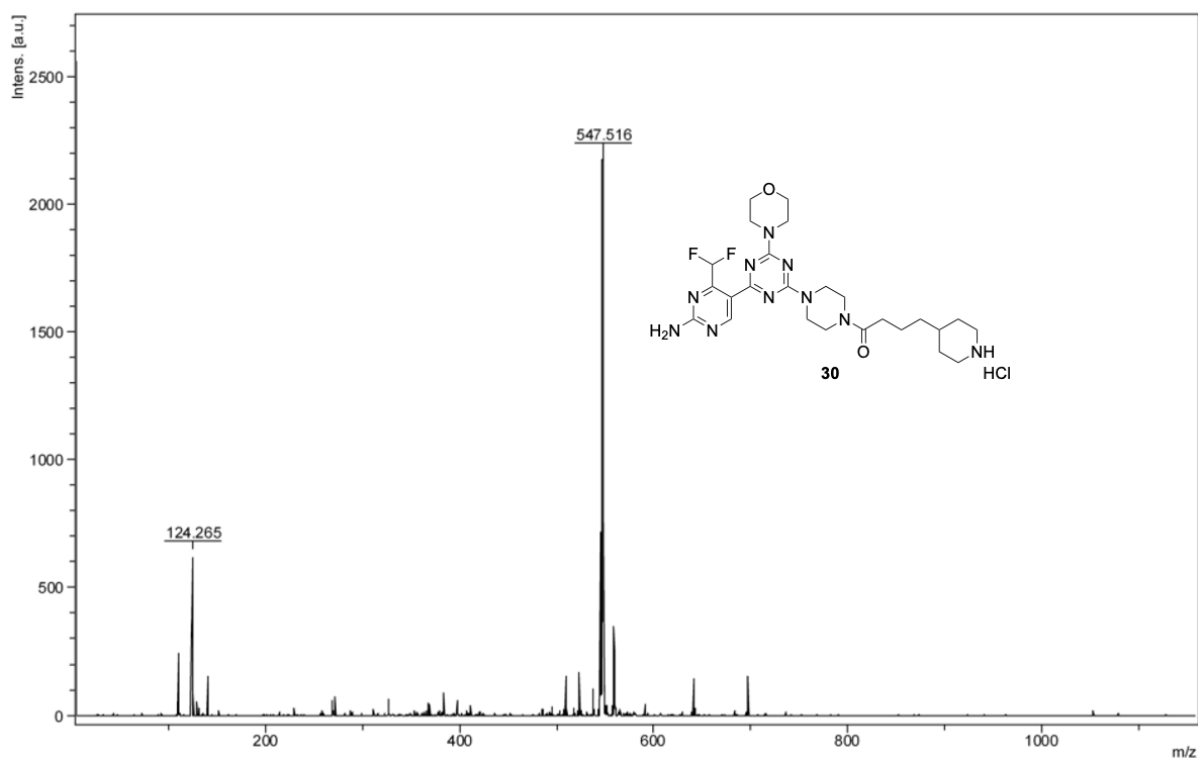

Figure S91. MALDI-MS of compound **30**.

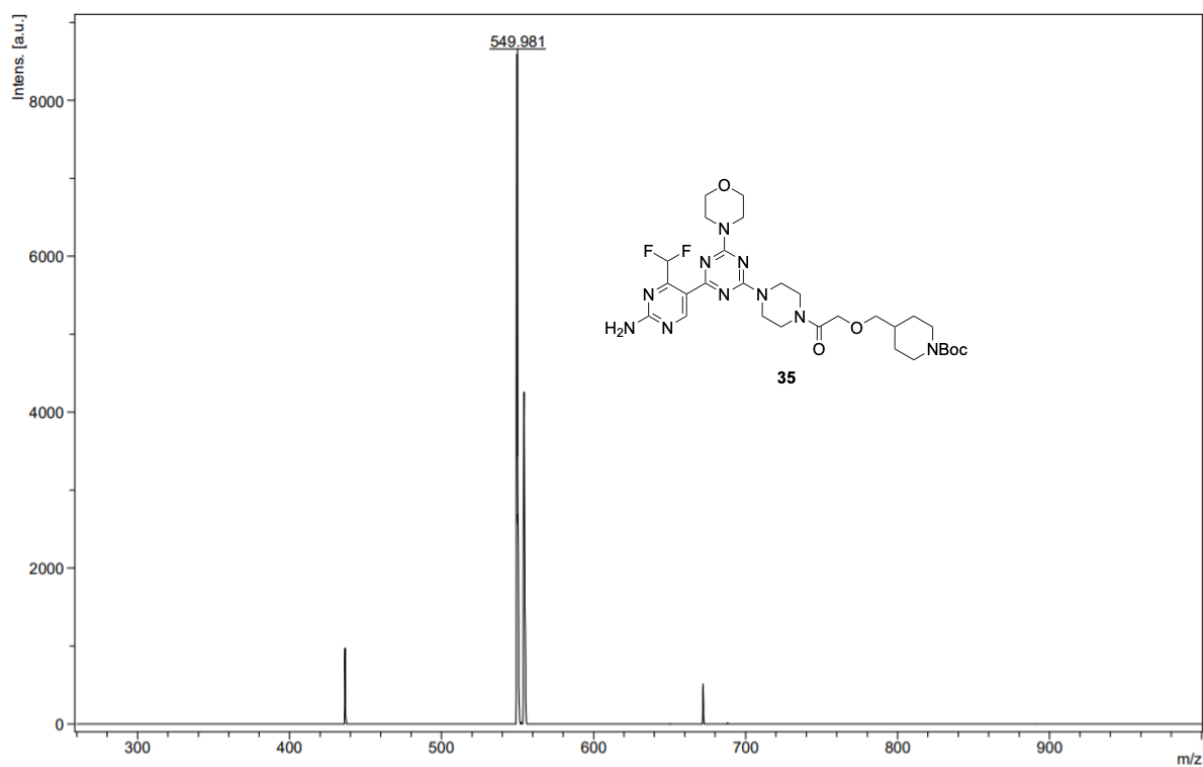

Figure S92. MALDI-MS of compound **35**.

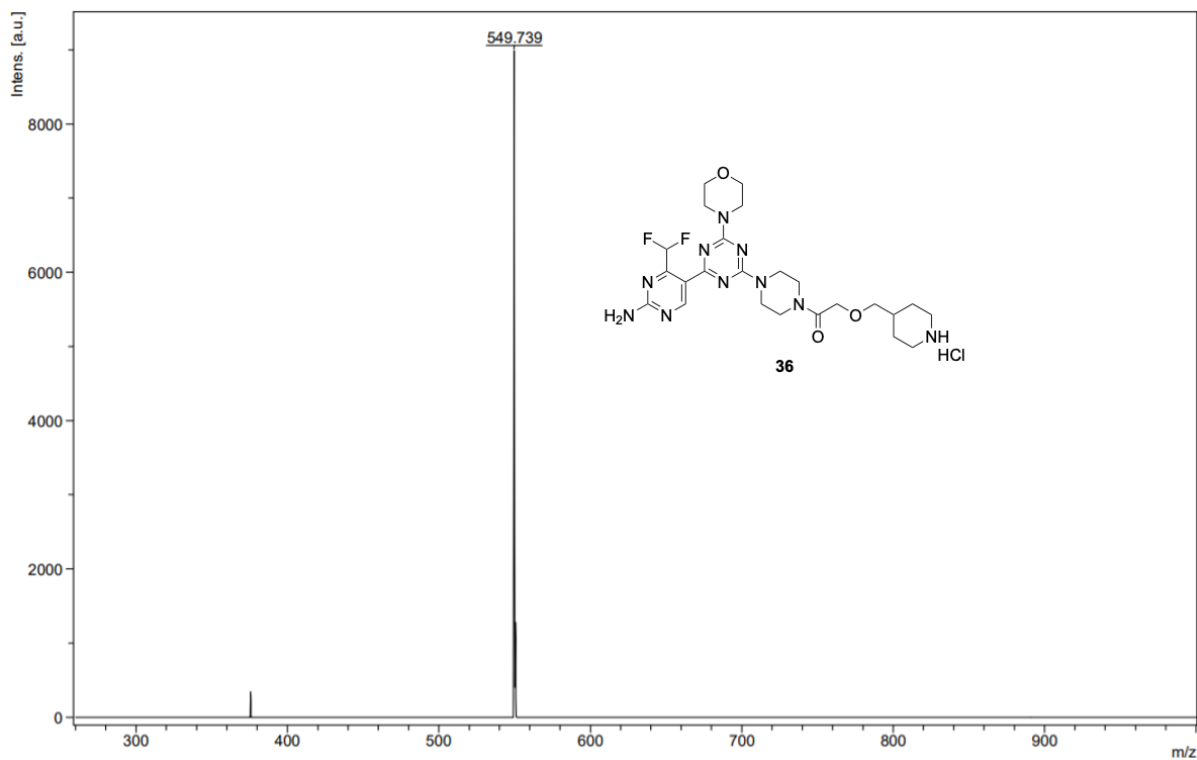

Figure S93. MALDI-MS of compound **36**.

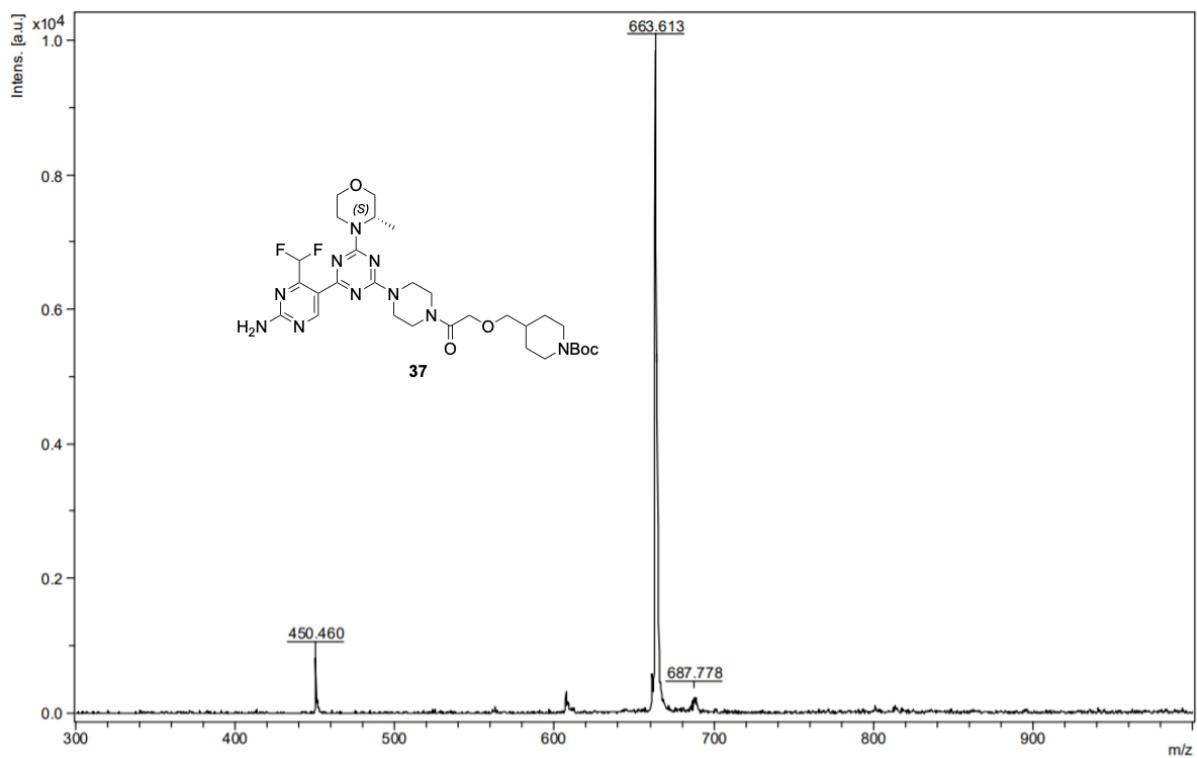

Figure S94. MALDI-MS of compound **37**.

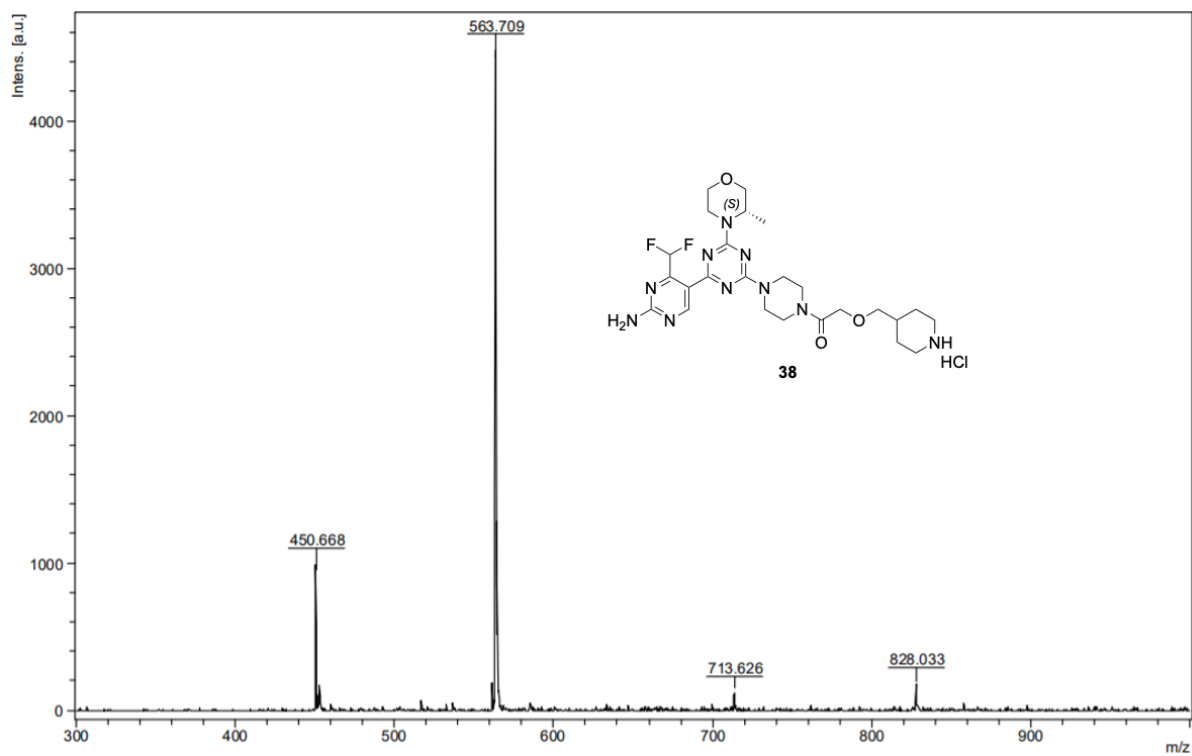

Figure S95. MALDI-MS of compound 38.

## HPLC data

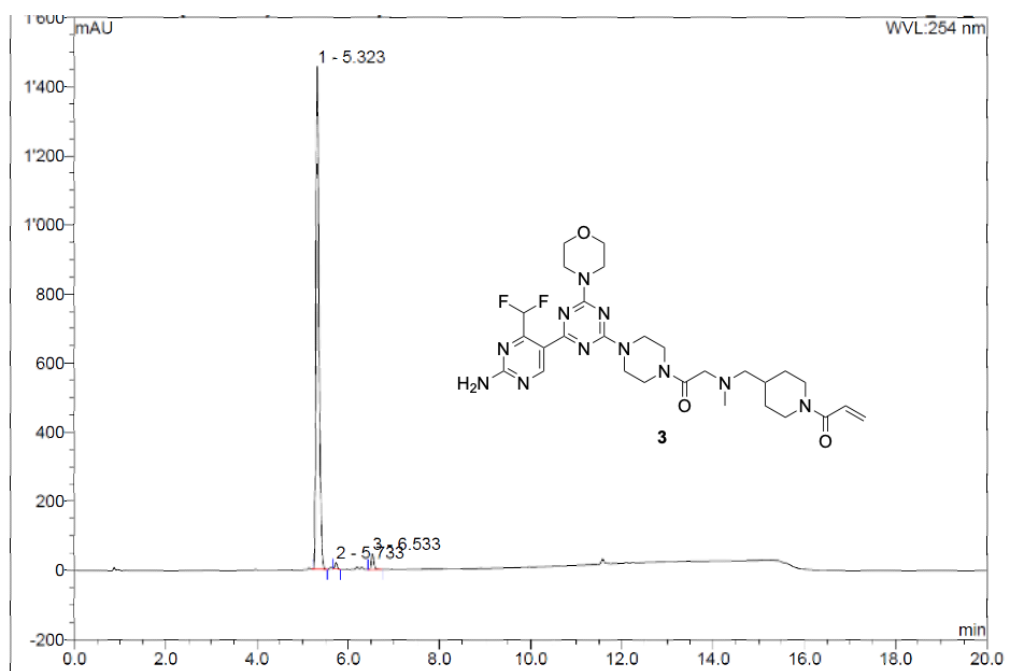

| No.           | Ret.Time<br>min | Peak Name | Height<br>mAU | Area<br>mAU*min | Rel.Area<br>% | Amount | Type |
|---------------|-----------------|-----------|---------------|-----------------|---------------|--------|------|
| 1             | 5.32            | n.a.      | 1455.338      | 112.192         | 96.59         | n.a.   | BMB  |
| 2             | 5.73            | n.a.      | 18.819        | 1.068           | 0.92          | n.a.   | BMB  |
| 3             | 6.53            | n.a.      | 45.217        | 2.895           | 2.49          | n.a.   | BMB  |
| <b>Total:</b> |                 |           | 1519.375      | 116.155         | 100.00        | 0.000  |      |

Figure S96. HPLC chromatogram of compound 3.

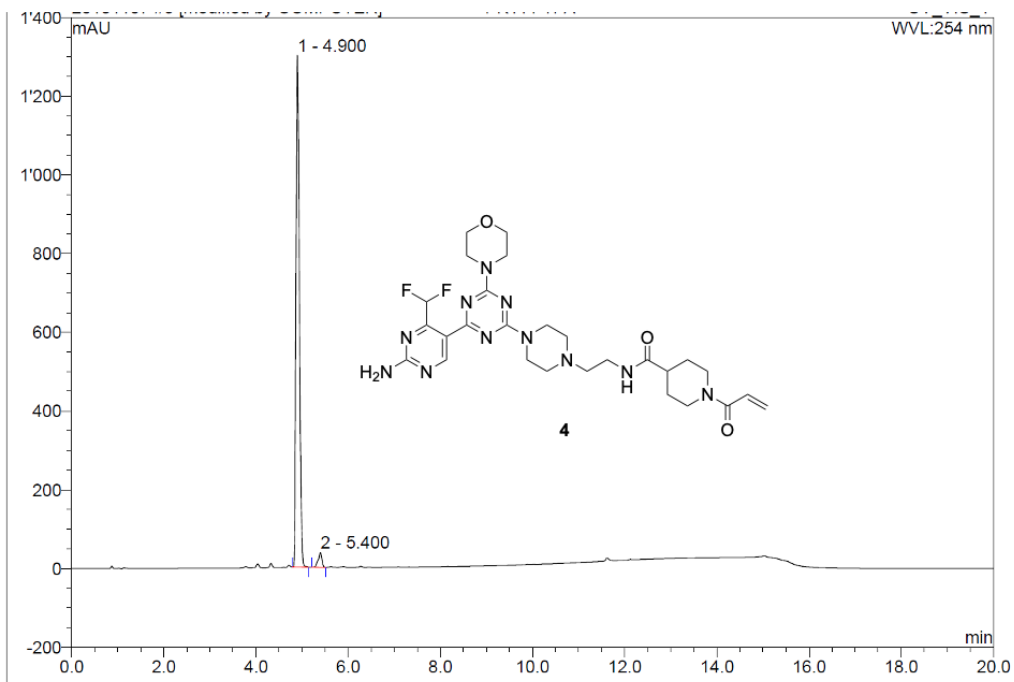

| No.           | Ret.Time<br>min | Peak Name | Height<br>mAU | Area<br>mAU*min | Rel.Area<br>% | Amount | Type |
|---------------|-----------------|-----------|---------------|-----------------|---------------|--------|------|
| 1             | 4.90            | n.a.      | 1300.933      | 111.610         | 96.99         | n.a.   | BMB  |
| 2             | 5.40            | n.a.      | 37.542        | 3.459           | 3.01          | n.a.   | BMB  |
| <b>Total:</b> |                 |           | 1338.475      | 115.069         | 100.00        | 0.000  |      |

Figure S97. HPLC chromatogram of compound 4.

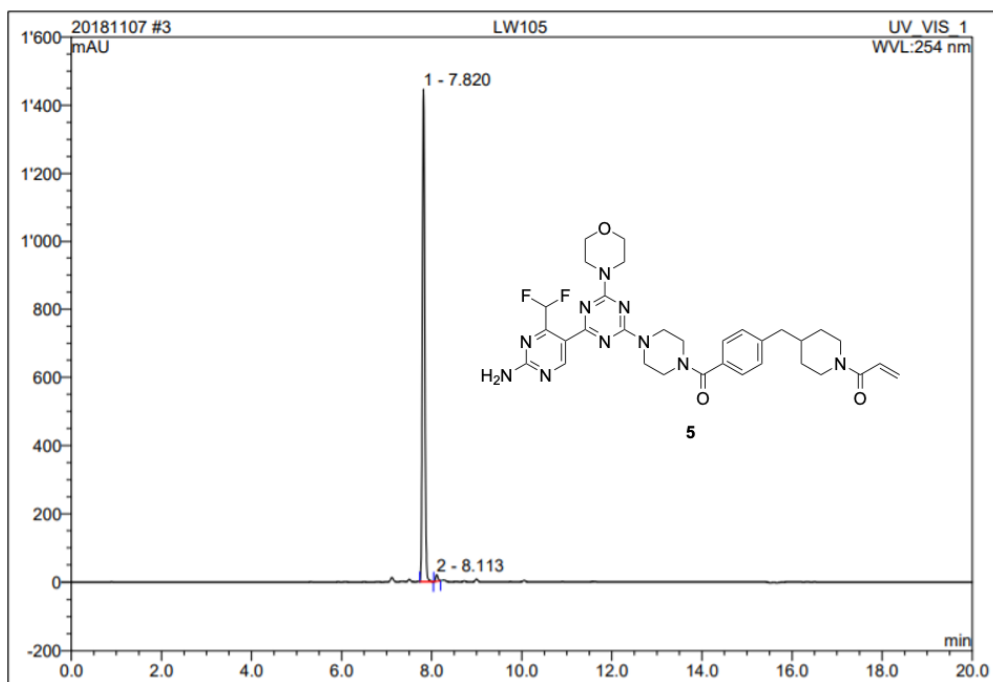

| No.           | Ret.Time<br>min | Peak Name | Height<br>mAU | Area<br>mAU*min | Rel.Area<br>% | Amount | Type |
|---------------|-----------------|-----------|---------------|-----------------|---------------|--------|------|
| 1             | 7.82            | n.a.      | 1444.747      | 89.697          | 98.86         | n.a.   | BMB  |
| 2             | 8.11            | n.a.      | 17.817        | 1.037           | 1.14          | n.a.   | BMB  |
| <b>Total:</b> |                 |           | 1462.564      | 90.735          | 100.00        | 0.000  |      |

Figure S98. HPLC chromatogram of compound 5.



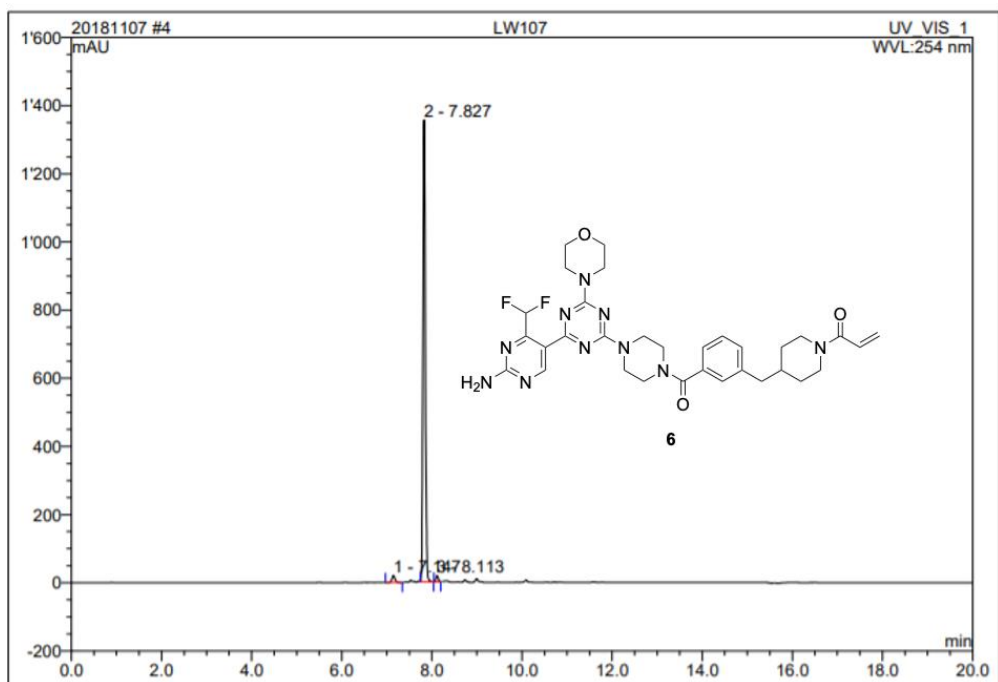

| No.           | Ret.Time<br>min | Peak Name | Height<br>mAU | Area<br>mAU*min | Rel.Area<br>% | Amount | Type |
|---------------|-----------------|-----------|---------------|-----------------|---------------|--------|------|
| 1             | 7.15            | n.a.      | 20.929        | 1.632           | 1.87          | n.a.   | BMB  |
| 2             | 7.83            | n.a.      | 1355.258      | 84.388          | 96.85         | n.a.   | BMB  |
| 3             | 8.11            | n.a.      | 18.402        | 1.110           | 1.27          | n.a.   | BMB  |
| <b>Total:</b> |                 |           | 1394.589      | 87.130          | 100.00        | 0.000  |      |

Figure S99. HPLC chromatogram of compound 6.

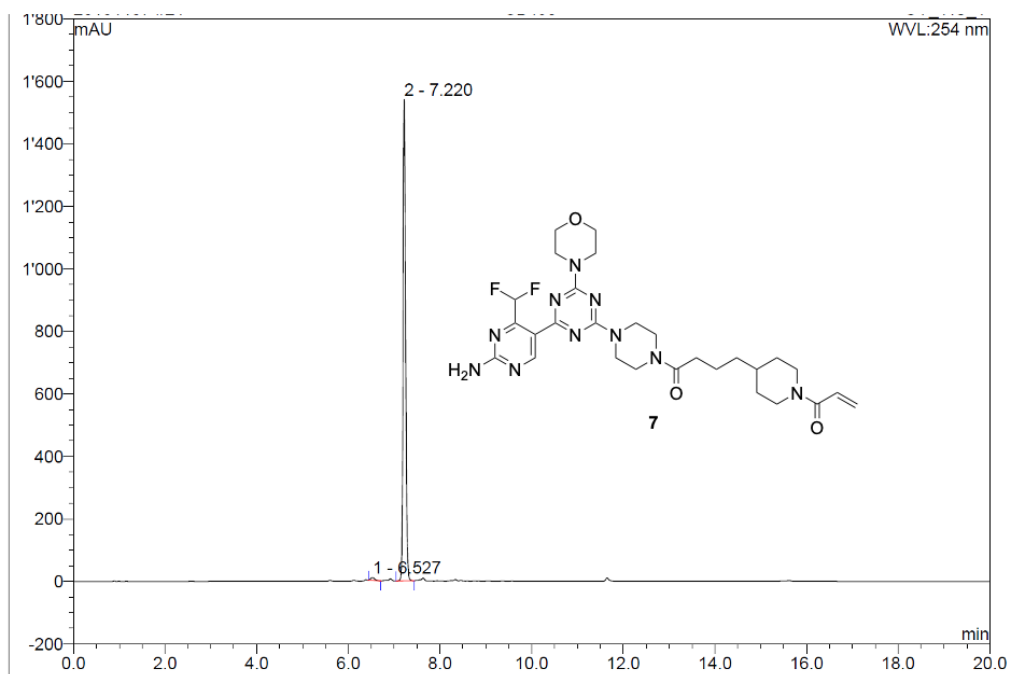

| No.           | Ret.Time<br>min | Peak Name | Height<br>mAU | Area<br>mAU*min | Rel.Area<br>% | Amount | Type |
|---------------|-----------------|-----------|---------------|-----------------|---------------|--------|------|
| 1             | 6.53            | n.a.      | 9.940         | 1.057           | 1.05          | n.a.   | BMB  |
| 2             | 7.22            | n.a.      | 1541.039      | 100.054         | 98.95         | n.a.   | BMB  |
| <b>Total:</b> |                 |           | 1550.979      | 101.111         | 100.00        | 0.000  |      |

Figure S100. HPLC chromatogram of compound 7.

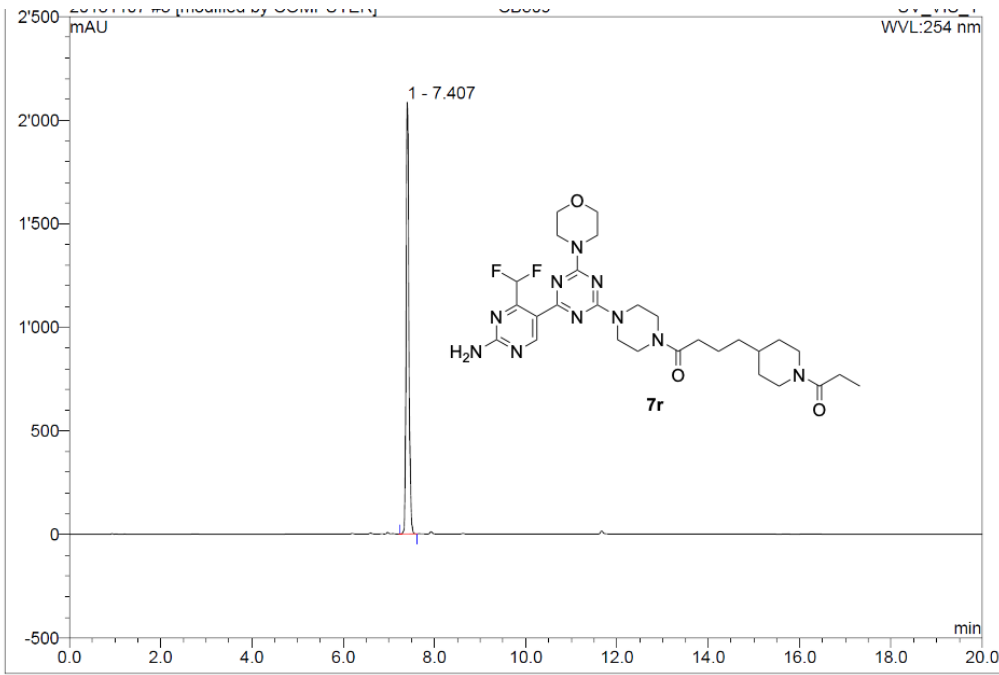

| No.           | Ret.Time<br>min | Peak Name | Height<br>mAU | Area<br>mAU*min | Rel.Area<br>% | Amount | Type |
|---------------|-----------------|-----------|---------------|-----------------|---------------|--------|------|
| 1             | 7.41            | n.a.      | 2084.821      | 145.824         | 100.00        | n.a.   | BMB  |
| <b>Total:</b> |                 |           | 2084.821      | 145.824         | 100.00        | 0.000  |      |

Figure S101. HPLC chromatogram of compound 7r.

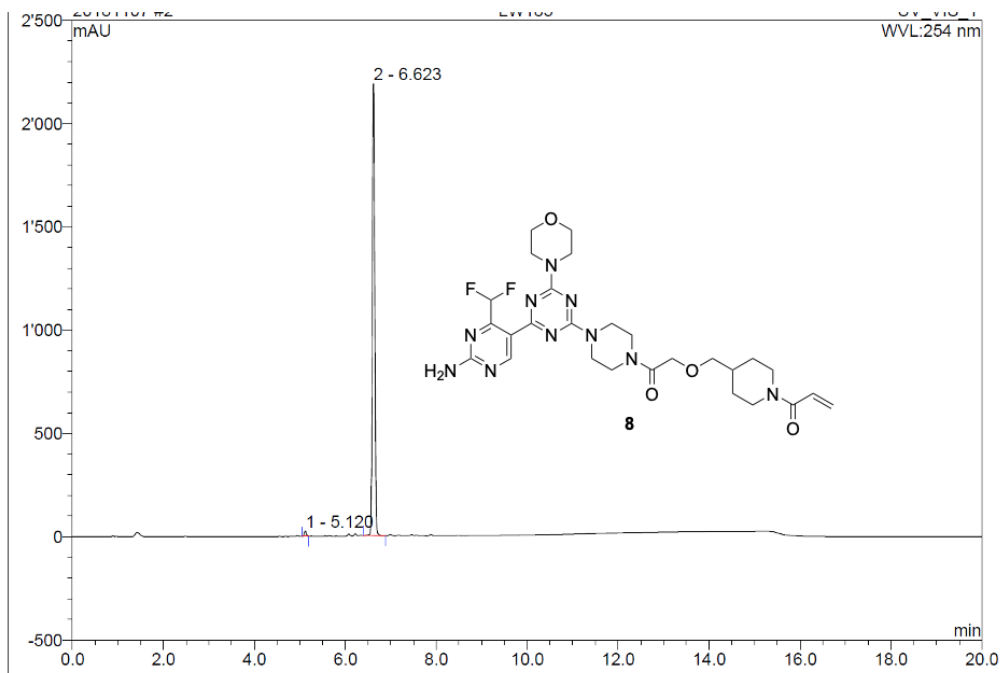

| No.           | Ret.Time min | Peak Name | Height mAU | Area mAU*min | Rel.Area % | Amount | Type |
|---------------|--------------|-----------|------------|--------------|------------|--------|------|
| 1             | 5.12         | n.a.      | 26.542     | 1.423        | 1.05       | n.a.   | BMB  |
| 2             | 6.62         | n.a.      | 2189.550   | 134.364      | 98.95      | n.a.   | BMB  |
| <b>Total:</b> |              |           | 2216.093   | 135.787      | 100.00     | 0.000  |      |

Figure S102. HPLC chromatogram of compound 8.

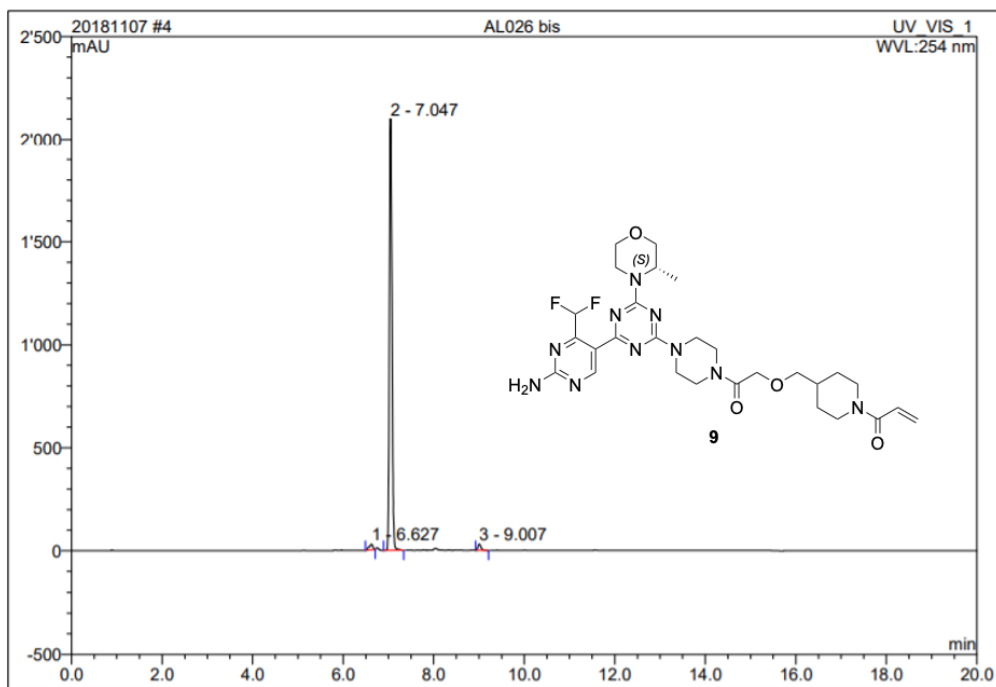

| No.           | Ret.Time min | Peak Name | Height mAU | Area mAU*min | Rel.Area % | Amount | Type |
|---------------|--------------|-----------|------------|--------------|------------|--------|------|
| 1             | 6.63         | n.a.      | 27.318     | 2.629        | 1.77       | n.a.   | BMB  |
| 2             | 7.05         | n.a.      | 2098.256   | 143.182      | 96.62      | n.a.   | BMB  |
| 3             | 9.01         | n.a.      | 30.708     | 2.387        | 1.61       | n.a.   | BMB  |
| <b>Total:</b> |              |           | 2156.282   | 148.198      | 100.00     | 0.000  |      |

Figure S103. HPLC chromatogram of compound 9.

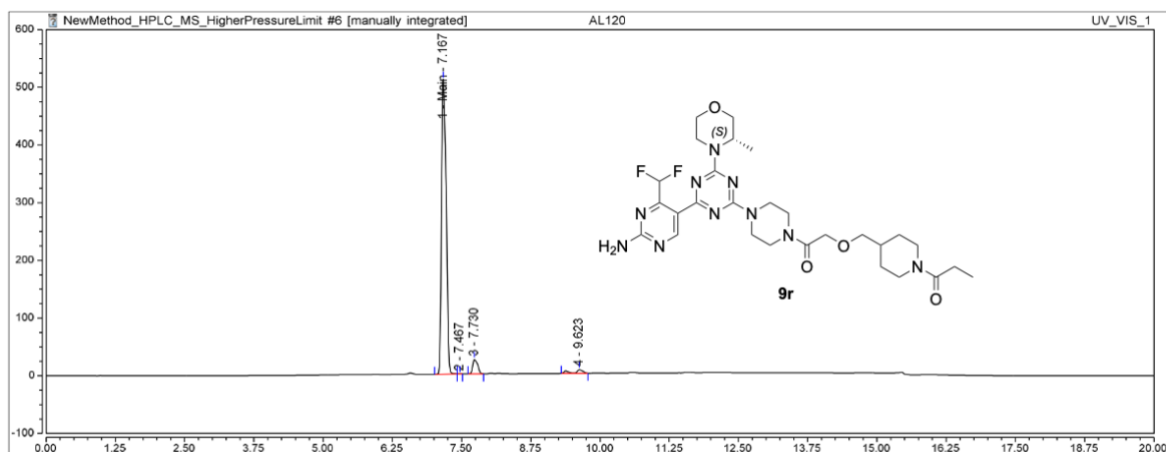

| No.           | Peak Name | Retention Time<br>min | Height<br>mAU  | Area<br>mAU*min | Relative Area<br>% | Abs. Max. at<br>nm | Sig.Max.<br>mAU |
|---------------|-----------|-----------------------|----------------|-----------------|--------------------|--------------------|-----------------|
| 1             | Main      | 7.167                 | 511.068        | 49.370          | 92.94              | 235.5              | 804.600         |
| 2             |           | 7.467                 | 0.166          | 0.012           | 0.02               | 200.0              | 30.261          |
| 3             |           | 7.730                 | 25.045         | 2.571           | 4.84               | 200.0              | 51.983          |
| 4             |           | 9.623                 | 6.451          | 1.169           | 2.20               | 200.0              | 59.907          |
| <b>Total:</b> |           |                       | <b>542.729</b> | <b>53.123</b>   | <b>100.00</b>      | <b>835.55</b>      |                 |

Figure S104. HPLC chromatogram of compound 9r.

## MALD-MS spectra of $\beta$ -mercaptoethanol ( $\beta$ -ME) adducts

1-(4-(((2-(4-(4-(2-amino-4-(difluoromethyl)pyrimidin-5-yl)-6-morpholino-1,3,5-triazin-2-yl)piperazin-1-yl)-2-oxoethyl)(methyl)amino)methyl)piperidin-1-yl)-3-((2-hydroxyethyl)thio)propan-1-one

(adduct with mercaptoethanol)

HPLC  $t_R$  = 5.25 min. MALDI-MS:  $m/z$  = 694.851 [M + H]<sup>+</sup>.

Starting compound: **3**, (HPLC  $t_R$  = 5.35 min).

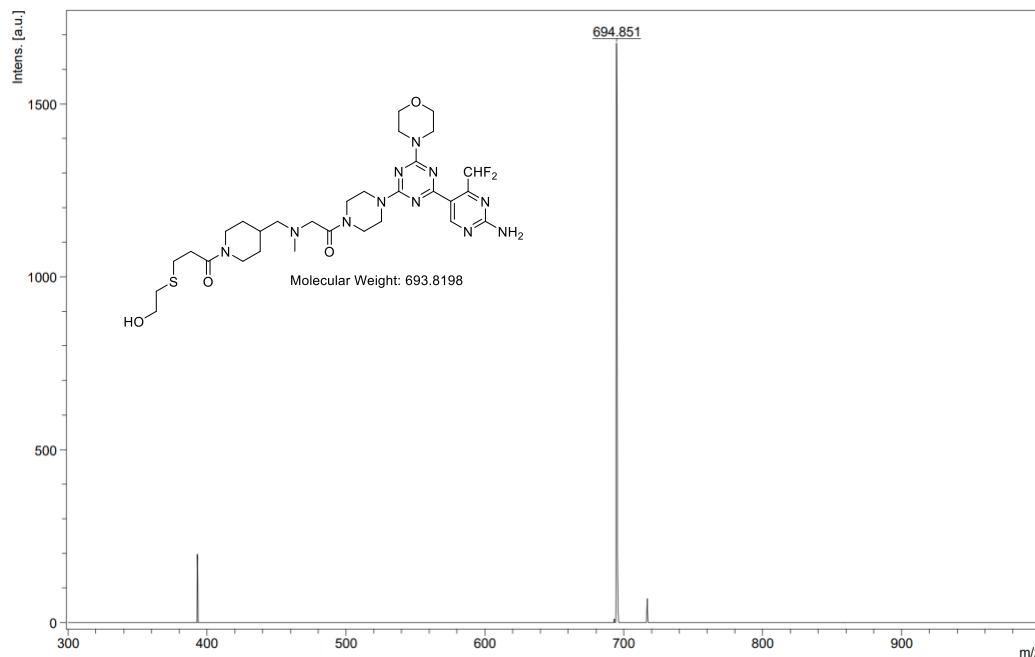

**Figure S105.** MALDI-MS of  $\beta$ -ME adduct of compound **3**.

1-(4-(4-(4-(4-(2-amino-4-(difluoromethyl)pyrimidin-5-yl)-6-morpholino-1,3,5-triazin-2-yl)piperazine-1-carbonyl)benzyl)piperidin-1-yl)-3-((2-hydroxyethyl)thio)propan-1-one

(adduct with mercaptoethanol)

HPLC  $t_R$  = 7.51 min. MALDI-MS:  $m/z$  = 728.118 [M + H]<sup>+</sup>.

Starting compound: **5** (HPLC  $t_R$  = 7.87 min).

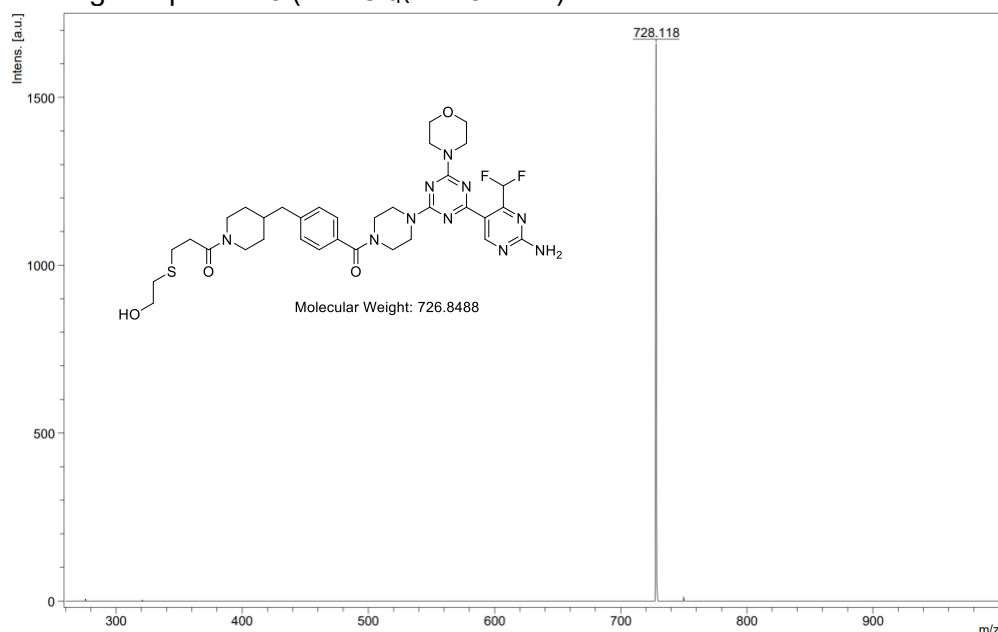

**Figure S106.** MALDI-MS of  $\beta$ -ME adduct of compound **5**.

1-(4-(3-(4-(4-(2-amino-4-(difluoromethyl)pyrimidin-5-yl)-6-morpholino-1,3,5-triazin-2-yl)piperazine-1-carbonyl)benzyl)piperidin-1-yl)-3-((2-hydroxyethyl)thio)propan-1-one (adduct with mercaptoethanol)  
HPLC  $t_R$  = 7.54 min. MALDI-MS:  $m/z$  = 727.966  $[M + H]^+$ ;  $m/z$  = 749.909  $[M + Na]^+$ .  
Starting compound: **6** (HPLC  $t_R$  = 7.88 min).

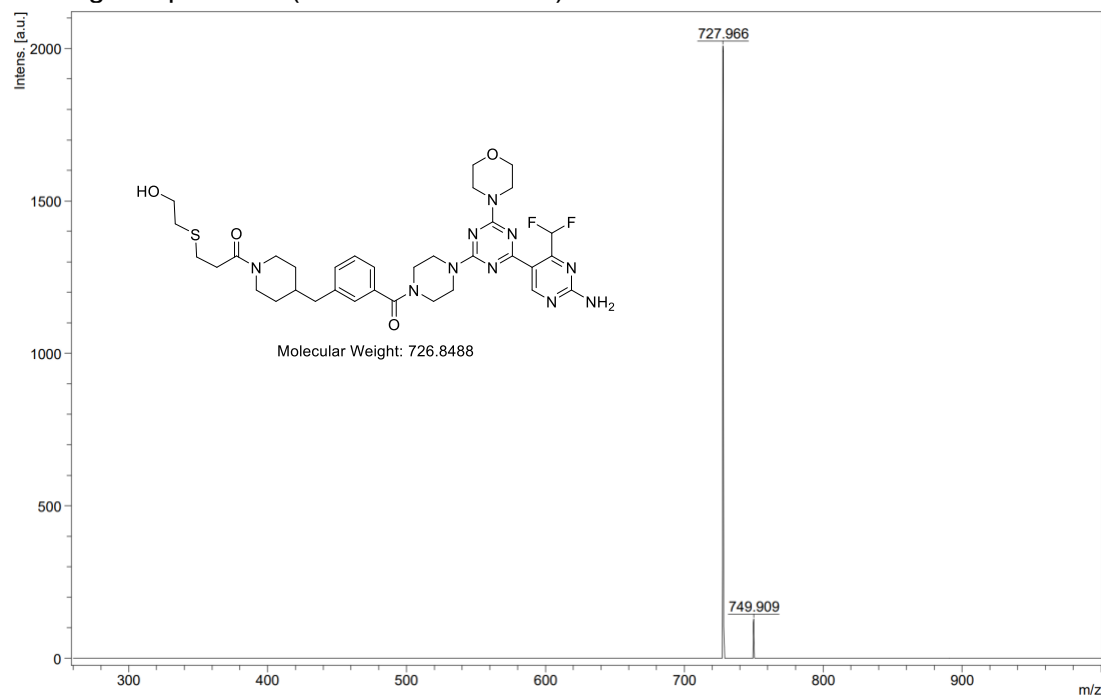

**Figure S107.** MALDI-MS of  $\beta$ -ME adduct of compound **5**.

1-(4-(4-(2-amino-4-(difluoromethyl)pyrimidin-5-yl)-6-morpholino-1,3,5-triazin-2-yl)piperazin-1-yl)-4-(1-(3-((2-hydroxyethyl)thio)propanoyl)piperidin-4-yl)butan-1-one (adduct with mercaptoethanol)  
HPLC  $t_R$  = 6.90 min. MALDI-MS:  $m/z$  = 679.868  $[M + H]^+$ .  
Starting compound: **7**, (HPLC  $t_R$  = 7.20 min).

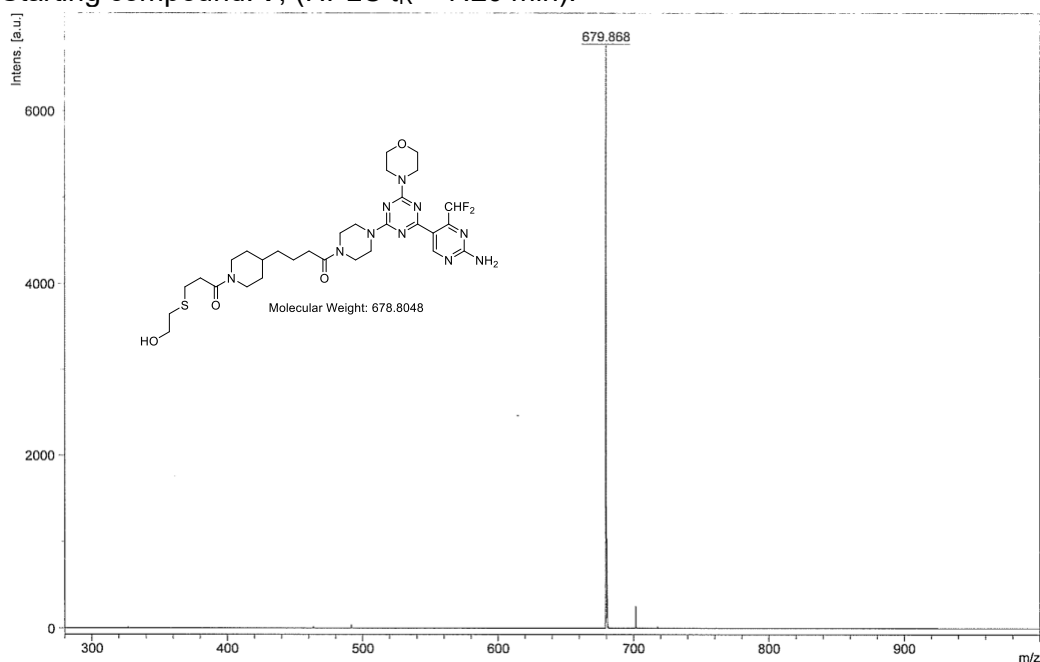

**Figure S108.** MALDI-MS of  $\beta$ -ME adduct of compound **7**.

1-(4-((2-(4-(4-(2-amino-4-(difluoromethyl)pyrimidin-5-yl)-6-morpholino-1,3,5-triazin-2-yl)piperazin-1-yl)-2-oxoethoxy)methyl)piperidin-1-yl)prop-2-en-1-one  
 (adduct with mercaptoethanol)  
 HPLC  $t_R$  = 6.42 min. MALDI-MS:  $m/z$  = 681.925 [M + H]<sup>+</sup>;  $m/z$  = 703.910 [M + Na]<sup>+</sup>  
 Starting compound: **8** (HPLC  $t_R$  = 6.66 min).

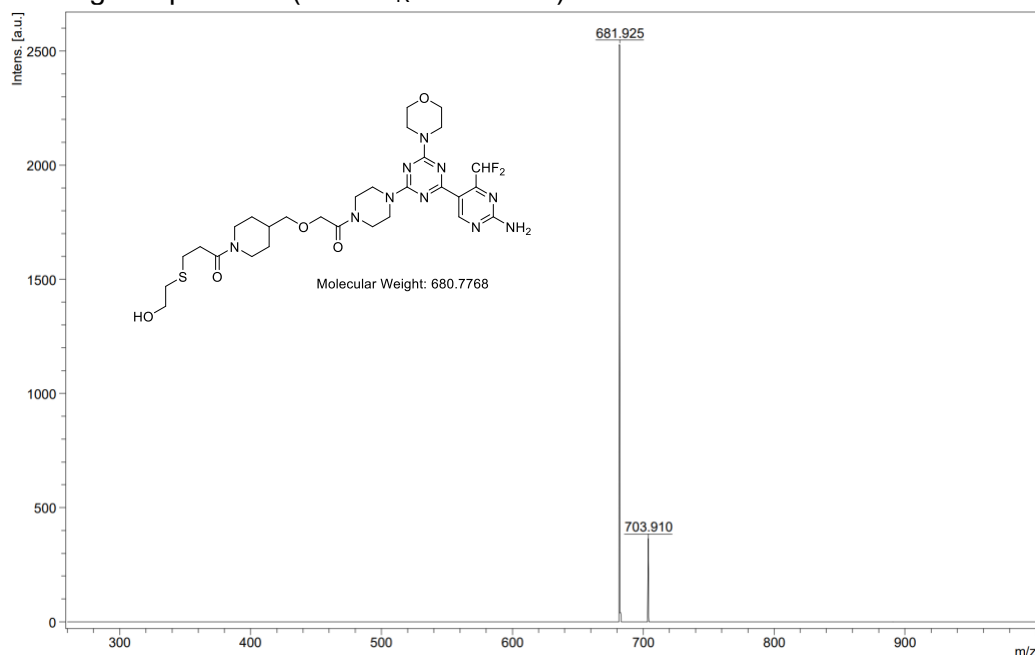

**Figure S109.** MALDI-MS of  $\beta$ -ME adduct of compound **8**.

(S)-1-(4-((2-(4-(4-(2-amino-4-(difluoromethyl)pyrimidin-5-yl)-6-(3-methylmorpholino)-1,3,5-triazin-2-yl)piperazin-1-yl)-2-oxoethoxy)methyl)piperidin-1-yl)-3-((2-hydroxyethyl)thio)propan-1-one  
 (adduct with mercaptoethanol)  
 HPLC  $t_R$  = 6.79 min. MALDI-MS:  $m/z$  = 695.3 [M + H]<sup>+</sup>;  $m/z$  = 717.3 [M + Na]<sup>+</sup>.  
 Starting compound: **9** (HPLC  $t_R$  = 7.05 min).

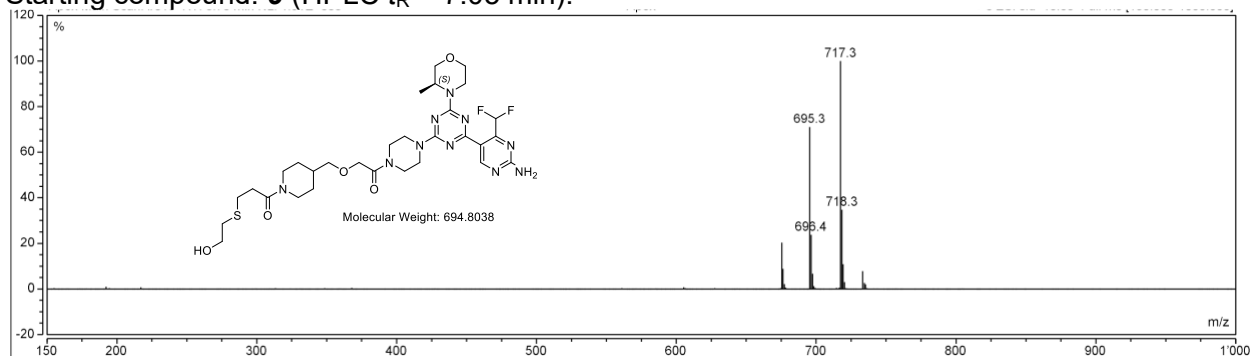

**Figure S110.** MALDI-MS of  $\beta$ -ME adduct of compound **9**.
